# Supplementary material for: Genome-Wide Host-Pathogen Interaction Unveiled by Transcriptomic Response of Diamondback Moth to Fungal Infection
Source: PubMed Central journal article supplement (PMC4820269; doi:10.1371/journal.pone.0152908), 2016-04-04
Supplement: pone.0152908.s001.pdf [file pone.0152908.s001.pdf]

## Genome-Wide Host-Pathogen Interaction Unveiled by Transcriptomic Response of Diamondback Moth to Fungal Infection

Zhen-Jian Chu<sup>1</sup>, Yu-Jun Wang<sup>2</sup>, Sheng-Hua Ying<sup>1</sup>, Xiao-Wei Wang<sup>2\*</sup> and Ming-Guang Feng<sup>1\*</sup>

<sup>1</sup>Institute of Microbiology, College of Life Sciences; <sup>2</sup>Institute of Insect Science, College of Agriculture and Biotechnology, Zhejiang University, Hangzhou 310058, China

\*Corresponding to: M.-G. Feng ([mgfeng@zju.edu.cn](mailto:mgfeng@zju.edu.cn)) or X.-W. Wang ([xwwang@zju.edu.cn](mailto:xwwang@zju.edu.cn))

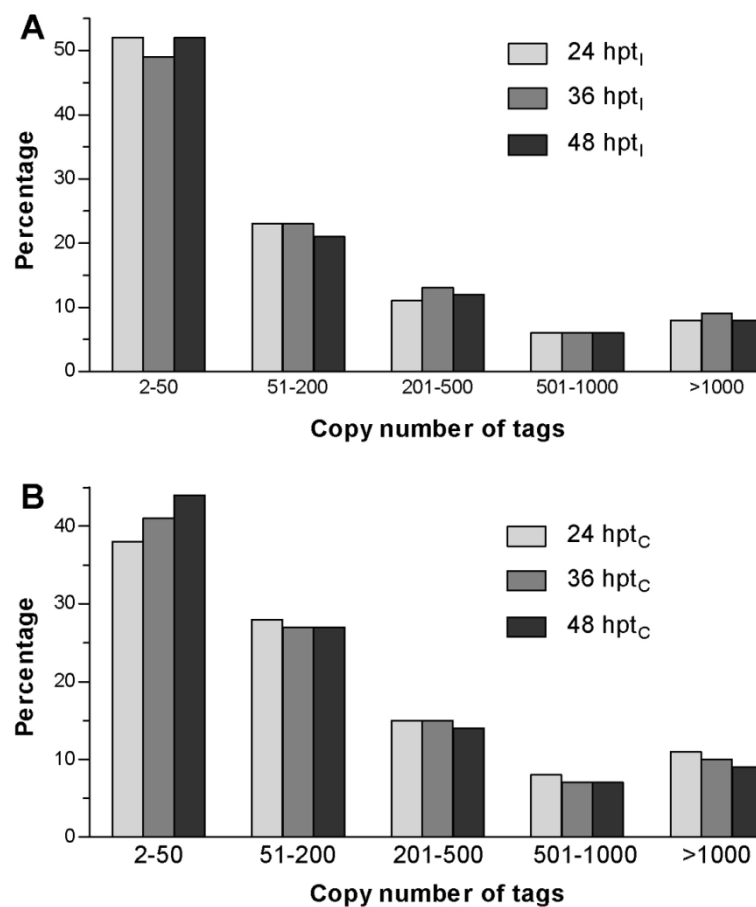

**Figure A.** Distribution of copy number of tags in the transcriptomes of third-instar larvae of *P. xylostella* at 24, 36 and 48 h post treatment of *B. bassiana* infection (A; hpt<sub>I</sub>) and control (B; hpt<sub>C</sub>).

**Table A.** Comparison of  $\log_2 R$  values for the genes randomly selected from the DGE libraries of *P. xylostella* and detected via qRT-PCR.

| Gene ID                                      | qPCR $\log_2 R$ | DGE $\log_2 R$ | Annotation                                                               |                                               |
|----------------------------------------------|-----------------|----------------|--------------------------------------------------------------------------|-----------------------------------------------|
| <b>24 hpt<sub>i</sub>/24 hpt<sub>c</sub></b> |                 |                |                                                                          |                                               |
| Px009419.1                                   | 3.70 ± 0.23     | 4.12           | Seminal fluid protein HACP044                                            | AGACTCACCGCCAGAATC / AATTGGTTATTGACAGTGTTCCT  |
| Px000119.2                                   | 3.23 ± 0.17     | 3.97           | Inositol hexakisphosphate and diphosphoinositol-pentakisphosphate kinase | TGTTATACCGCAGGAATACG / TTCTTCAGCAGTGGAGTG     |
| Px010113.1                                   | 4.80 ± 0.45     | 3.95           | Moricin-like peptide C4                                                  | GAAGGGCGGAAGAGTTAT / CGTGGTTGTACTTTCAT        |
| Px001312.1                                   | 4.76 ± 0.31     | 3.76           | Peptidoglycan-recognition protein LB                                     | CAACACATCGGCATCCAC / GAATCTCCAATCTCCAATAAGACA |
| Px012904.1                                   | -3.02 ± 0.43    | -1.92          | Serine/threonine-protein phosphatase 2A catalytic subunit alpha isoform  | TATGCCTCAGATATAGAC / ACCGATAAGGAATAAGAT       |
| Px009109.1                                   | -4.41 ± 0.86    | -1.90          | Cuticular protein CPG4                                                   | TTACAGTCACTACTCTCTC / GTTACCACCTTGTTCAC       |
| Px010053.1                                   | -1.32 ± 0.09    | -1.88          | Eukaryotic translation initiation factor 5                               | TGATGAGGAGGATGAAGAGGAT / TTGGACGGCTTGGTGTATG  |
| <b>36 hpt<sub>i</sub>/36 hpt<sub>c</sub></b> |                 |                |                                                                          |                                               |
| Px006831.1                                   | 2.49 ± 0.36     | 4.83           | Putative uncharacterized protein                                         | CACTGGAGATGGAATTAG / CGTGTGGTCTTCTATGA        |
| Px008276.1                                   | 0.41 ± 0.06     | 4.61           | Membrane alanyl aminopeptidase                                           | AATACTCAGATTGCCTTC / GGAGGAGATGTAGGATAA       |
| Px000995.2                                   | 2.48 ± 0.55     | 4.39           | Carboxypeptidase A4                                                      | CTATGGCAATGGAACACT / CTTCTTAACAGCATCAATGG     |
| Px004749.1                                   | 2.40 ± 0.24     | 4.25           | Lipoprotein lipase                                                       | CTTTACACCAGGAGGAAC / AAGTTGGAGTTGTTGATG       |
| Px001065.1                                   | -5.18 ± 0.97    | -3.91          | Cuticle protein                                                          | TACTCCTCTGGCTACTCT / TCAGTAGTATCCACCGTG       |
| Px008653.1                                   | -3.97 ± 0.28    | -3.33          | Cuticle protein                                                          | AGTATTCGCTCTCCTGGT / TCCGTATGAGAAGCTGTTG      |
| Px014536.1                                   | -2.59 ± 0.38    | -2.91          | Unknown function                                                         | ATACGCTGCCTCCTACAT / AGTATGAGTACGAGTACGAAGT   |
| <b>48 hpt<sub>i</sub>/48 hpt<sub>c</sub></b> |                 |                |                                                                          |                                               |
| Px008089.1                                   | 5.82 ± 1.05     | 3.92           | Pancreatic lipase-related protein 2                                      | TATGGTATCAATGGTGACGAAT / ACCGAAGCCAATATGTG    |
| Px010113.1                                   | 2.66 ± 0.66     | 3.38           | Moricin-like peptide C4                                                  | GAAGGGCGGAAGAGTTAT / CGTGGTTGTACTTTCAT        |
| Px013480.1                                   | 2.83 ± 0.21     | 3.04           | Hemolin                                                                  | AACTAACGATAAECTCACAAC / GCTTCACATCCATAATACC   |
| Px001312.1                                   | 4.73 ± 0.63     | 3.02           | Peptidoglycan-recognition protein LB                                     | CAACACATCGGCATCCAC / GAATCTCCAATCTCCAATAAGACA |
| Px017384.1                                   | -2.99 ± 0.35    | -3.62          | Putative cuticle protein                                                 | GGTCGGACGCACAGTAAG / TTGCTCAATACCTTATGGTAGACT |
| Px011723.1                                   | -0.06 ± 0.03    | -3.34          | Unknown function                                                         | GGTAATGTCAATCAGGATA / TTCACTCAGTTCTTCTTC      |
| Px010443.2                                   | -0.8 ± 0.26     | -3.20          | Putative uncharacterized protein                                         | AGTGGATTCAATGCTGATG / CCGTAGGAACCAAGTGTA      |
| Px008022.1                                   |                 |                | 60S ribosomal protein L32                                                | CAATCAGGCCAATTTACCGC / CTGGGTTTACGCCAGTTACG   |

**Table B.** A list of DEGs enriched in the pathways of *P. xylostella* 24 h post treatment of infection (hpt<sub>I</sub>) versus 24 h post treatment of control (hpt<sub>C</sub>).

| Gene ID                                             | log <sub>2</sub> R | P-value   | FDR       | Annotation                                                          |
|-----------------------------------------------------|--------------------|-----------|-----------|---------------------------------------------------------------------|
| <b>Involved in Protein digestion and absorption</b> |                    |           |           |                                                                     |
| Px015280.1                                          | 10.8687            | 2.87E-10  | 1.76E-09  | Trypsin CFT-1; similar with TRYP_CHOFU                              |
| Px007357.2                                          | 6.6517             | 0.00E+00  | 0.00E+00  | Serine proteinase stubble; similar with STUB_DROME                  |
| Px006254.1                                          | 4.4212             | 6.36E-06  | 2.52E-05  | Chymotrypsin-2; similar with CTR2_ANOGA                             |
| Px007620.1                                          | 3.6327             | 1.75E-08  | 9.13E-08  | Trypsin CFT-1; similar with TRYP_CHOFU                              |
| Px016055.1                                          | 3.2151             | 6.89E-29  | 1.03E-27  | Trypsin, alkaline C; similar with TRYC_MANSE                        |
| Px003546.1                                          | 3.1733             | 2.80E-04  | 8.56E-04  | Trypsin, alkaline C; similar with TRYC_MANSE                        |
| Px010386.1                                          | 2.6772             | 0.00E+00  | 0.00E+00  | Trypsin CFT-1; similar with TRYP_CHOFU                              |
| Px015277.1                                          | 2.5730             | 1.28E-54  | 3.19E-53  | Trypsin CFT-1; similar with TRYP_CHOFU                              |
| Px015276.1                                          | 2.5579             | 1.86E-30  | 2.90E-29  | Trypsin CFT-1; similar with TRYP_CHOFU                              |
| Px007619.2                                          | 2.3494             | 0.00E+00  | 0.00E+00  | Trypsin, alkaline A; similar with TRYA_MANSE                        |
| Px014769.1                                          | 2.3190             | 3.12E-54  | 7.70E-53  | Serine proteinase stubble; similar with STUB_DROME                  |
| Px005241.1                                          | 2.3004             | 9.73E-13  | 7.17E-12  | Trypsin CFT-1; similar with TRYP_CHOFU                              |
| Px009569.1                                          | 2.2896             | 2.53E-216 | 1.66E-214 | Trypsin CFT-1; similar with TRYP_CHOFU                              |
| Px010975.1                                          | 2.2277             | 1.85E-08  | 9.63E-08  | Trypsin, alkaline C; similar with TRYC_MANSE                        |
| Px014256.1                                          | 2.1988             | 9.73E-09  | 5.21E-08  | Unknown function                                                    |
| Px011887.1                                          | 2.1323             | 9.63E-147 | 4.78E-145 | Trypsin, alkaline C; similar with TRYC_MANSE                        |
| Px009488.1                                          | 2.0714             | 3.01E-06  | 1.24E-05  | Chymotrypsin-like serine proteinase                                 |
| Px009088.1                                          | 2.0671             | 8.40E-275 | 6.89E-273 | Mastin; similar with TRYM_CANFA                                     |
| Px007621.1                                          | 2.0663             | 1.43E-07  | 6.93E-07  | Trypsin CFT-1; similar with TRYP_CHOFU                              |
| Px003670.2                                          | 2.0614             | 0.00E+00  | 0.00E+00  | Serine protease easter; similar with EAST_DROME                     |
| Px002441.1                                          | 1.9871             | 4.10E-39  | 7.84E-38  | Trypsin, alkaline B; similar with TRYB_MANSE                        |
| Px006571.1                                          | 1.9668             | 0.00E+00  | 0.00E+00  | Trypsin, alkaline B; similar with TRYB_MANSE                        |
| Px008538.1                                          | 1.9379             | 5.30E-72  | 1.61E-70  | Trypsin, alkaline B; similar with TRYB_MANSE                        |
| Px011231.1                                          | 1.8761             | 1.79E-17  | 1.77E-16  | Protein unc-50 homolog; similar with UNC50_DROME                    |
| Px015278.1                                          | 1.8699             | 3.08E-11  | 2.04E-10  | Trypsin, alkaline A; similar with TRYA_MANSE                        |
| Px014830.1                                          | 1.8574             | 0.00E+00  | 0.00E+00  | Tryptase; similar with TRYB1_MOUSE                                  |
| Px009568.1                                          | 1.8431             | 6.70E-05  | 2.27E-04  | Trypsin, alkaline C; similar with TRYC_MANSE                        |
| Px001990.2                                          | 1.7922             | 1.40E-22  | 1.73E-21  | Carboxypeptidase B; similar with CBPB_ASTFL                         |
| Px011499.2                                          | 1.7910             | 6.11E-19  | 6.55E-18  | Serine protease persephone; similar with PSH_DROME                  |
| Px001833.1                                          | 1.7864             | 0.00E+00  | 0.00E+00  | Serine protease easter; similar with EAST_DROME                     |
| Px011737.1                                          | 1.7654             | 0.00E+00  | 0.00E+00  | Neurofilament heavy polypeptide; similar with NFH_MOUSE             |
| Px017515.1                                          | 1.7186             | 1.09E-80  | 3.60E-79  | Trypsin, alkaline C; similar with TRYC_MANSE                        |
| Px007598.1                                          | 1.6692             | 9.57E-31  | 1.50E-29  | Chymotrypsin-1; similar with CTR1_ANOGA                             |
| Px005240.1                                          | 1.6409             | 7.98E-17  | 7.63E-16  | Trypsin, alkaline A; similar with TRYA_MANSE                        |
| Px005242.1                                          | 1.6327             | 5.68E-10  | 3.38E-09  | Trypsin CFT-1; similar with TRYP_CHOFU                              |
| Px000107.1                                          | 1.5952             | 7.26E-250 | 5.34E-248 | Trypsin, alkaline C; similar with TRYC_MANSE                        |
| Px014882.1                                          | 1.5792             | 1.59E-27  | 2.28E-26  | Trypsin, alkaline C; similar with TRYC_MANSE                        |
| Px015275.1                                          | 1.5751             | 0.00E+00  | 0.00E+00  | Trypsin CFT-1; similar with TRYP_CHOFU                              |
| Px007616.1                                          | 1.5713             | 2.75E-83  | 9.34E-82  | Trypsin CFT-1; similar with TRYP_CHOFU                              |
| Px006572.1                                          | 1.5612             | 0.00E+00  | 0.00E+00  | Trypsin; similar with TRYP_PHACE                                    |
| Px013377.1                                          | 1.5480             | 1.88E-43  | 3.82E-42  | Trypsin; similar with TRYP_PHACE                                    |
| Px016057.1                                          | 1.5292             | 2.72E-23  | 3.45E-22  | Trypsin, alkaline B; similar with TRYB_MANSE                        |
| Px012048.1                                          | 1.5055             | 2.98E-12  | 2.12E-11  | Chymotrypsin BI; similar with CTRB1_LITVA                           |
| Px005936.2                                          | 1.5008             | 1.12E-40  | 2.19E-39  | Trypsin, alkaline C; similar with TRYC_MANSE                        |
| Px000996.2                                          | 1.4897             | 7.66E-31  | 1.21E-29  | Carboxypeptidase A2; similar with CBPA2_MOUSE                       |
| Px005243.1                                          | 1.4820             | 0.00E+00  | 0.00E+00  | Trypsin, alkaline A; similar with TRYA_MANSE                        |
| Px012568.1                                          | 1.4572             | 4.65E-123 | 2.06E-121 | Trypsin CFT-1; similar with TRYP_CHOFU                              |
| Px005765.1                                          | 1.4516             | 5.48E-18  | 5.59E-17  | Vitellin-degrading protease; similar with VDP_BOMMO                 |
| Px001649.1                                          | 1.4424             | 1.08E-21  | 1.30E-20  | MAM domain-containing glycosylphosphatidylinositol anchor protein 1 |

|            |         |           |           |                                                                   |
|------------|---------|-----------|-----------|-------------------------------------------------------------------|
| Px002440.1 | 1.4335  | 9.19E-09  | 4.93E-08  | Trypsin, alkaline B; similar with TRYB_MANSE                      |
| Px014534.1 | 1.4237  | 7.49E-32  | 1.21E-30  | Trypsin CFT-1; similar with TRYP_CHOFU                            |
| Px016058.1 | 1.3964  | 2.20E-207 | 1.39E-205 | Trypsin, alkaline C; similar with TRYC_MANSE                      |
| Px003671.1 | 1.3824  | 8.09E-185 | 4.69E-183 | Serine protease easter; similar with EAST_DROME                   |
| Px009638.1 | 1.3782  | 0.00E+00  | 0.00E+00  | Trypsin, alkaline B; similar with TRYB_MANSE                      |
| Px014831.2 | 1.3474  | 0.00E+00  | 0.00E+00  | Serine proteinase stubble; similar with STUB_DROME                |
| Px000991.6 | 1.3435  | 4.35E-64  | 1.21E-62  | Carboxypeptidase O; similar with CBPO_BOVIN                       |
| Px016054.1 | 1.3362  | 5.17E-08  | 2.60E-07  | Trypsin; similar with TRYP_PHACE                                  |
| Px015049.1 | 1.3171  | 5.14E-10  | 3.08E-09  | Venom dipeptidyl peptidase 4; similar with VDDP4_VESVU            |
| Px011428.1 | 1.2988  | 8.65E-06  | 3.36E-05  | Peptide transporter family 1; similar with PEPT1_DROME            |
| Px010627.1 | 1.2976  | 5.21E-112 | 2.15E-110 | Wing disc-specific protein; similar with Q8WPH2_BOMMO             |
| Px007900.1 | 1.2849  | 0.00E+00  | 0.00E+00  | Chymotrypsin BI; similar with CTRB1_LITVA                         |
| Px009639.1 | 1.2774  | 0.00E+00  | 0.00E+00  | Trypsin CFT-1; similar with TRYP_CHOFU                            |
| Px005328.1 | 1.2421  | 2.94E-22  | 3.60E-21  | Tubulin-specific chaperone cofactor E-like protein                |
| Px002588.1 | 1.2360  | 9.87E-07  | 4.33E-06  | Trypsin, alkaline C; similar with TRYC_MANSE                      |
| Px009395.1 | 1.1916  | 1.32E-05  | 5.00E-05  | Proclotting enzyme; similar with PCE_TACTR                        |
| Px011886.1 | 1.1422  | 3.65E-31  | 5.79E-30  | Trypsin CFT-1; similar with TRYP_CHOFU                            |
| Px016056.1 | 1.1375  | 0.00E+00  | 0.00E+00  | Trypsin, alkaline A; similar with TRYA_MANSE                      |
| Px013299.1 | 1.1172  | 3.69E-82  | 1.25E-80  | Serine proteinase stubble; similar with STUB_DROME                |
| Px000402.2 | 1.1008  | 8.17E-19  | 8.68E-18  | Serine protease persephone; similar with PSH_DROME                |
| Px012329.1 | 1.0969  | 2.64E-32  | 4.31E-31  | Serine protease persephone; similar with PSH_DROME                |
| Px007599.1 | 1.0927  | 0.00E+00  | 0.00E+00  | Chymotrypsin-1; similar with CTR1_ANOGA                           |
| Px000993.1 | 1.0428  | 2.30E-209 | 1.47E-207 | Carboxypeptidase A2; similar with CBPA2_RAT                       |
| Px007600.1 | 1.0192  | 1.33E-52  | 3.21E-51  | Chymotrypsin-1; similar with CTR1_ANOGA                           |
| Px012191.1 | 1.0108  | 5.91E-126 | 2.65E-124 | Sodium/potassium-transporting ATPase subunit alpha-1              |
| Px013146.1 | -9.6079 | 4.14E-05  | 1.46E-04  | Trypsin; similar with TRYP_PHACE                                  |
| Px012497.1 | -9.3373 | 1.47E-04  | 4.73E-04  | Trypsin-4; similar with TRY4_ANOGA                                |
| Px010996.1 | -9.2004 | 6.17E-06  | 2.46E-05  | Excitatory amino acid transporter; similar with EAA1_CAEEL        |
| Px017492.1 | -8.9602 | 3.86E-08  | 1.96E-07  | Trypsin CFT-1; similar with TRYP_CHOFU                            |
| Px000188.1 | -8.4578 | 1.16E-05  | 4.44E-05  | Inactive dipeptidyl peptidase 10; similar with DPP10_HUMAN        |
| Px000082.7 | -3.4897 | 4.66E-08  | 2.35E-07  | Collagen alpha-1(XVIII) chain; similar with COIA1_MOUSE           |
| Px008406.1 | -2.8856 | 5.90E-05  | 2.02E-04  | Serine proteinase stubble; similar with STUB_DROME                |
| Px013802.1 | -2.8624 | 2.15E-07  | 1.03E-06  | Sodium/potassium-transporting ATPase subunit alpha-2              |
| Px009218.1 | -2.2069 | 4.12E-21  | 4.84E-20  | Protein BCL9 homolog; similar with BCL9_DROME                     |
| Px013807.1 | -2.1804 | 2.38E-06  | 1.00E-05  | Proton-coupled amino acid transporter 4; similar with S36A4_XENLA |
| Px011954.1 | -2.1036 | 5.94E-08  | 2.97E-07  | Sodium/hydrogen exchanger 3; similar with SL9A3_HUMAN             |
| Px011754.1 | -2.0240 | 6.17E-28  | 9.02E-27  | Proton-coupled amino acid transporter 1; similar with S36A1_HUMAN |
| Px013747.1 | -1.9944 | 1.35E-32  | 2.23E-31  | Proton-coupled amino acid transporter 1; similar with S36A1_HUMAN |
| Px011097.1 | -1.8357 | 1.53E-15  | 1.35E-14  | Serine proteinase stubble; similar with STUB_DROME                |
| Px005208.1 | -1.6792 | 2.19E-06  | 9.23E-06  | Inactive dipeptidyl peptidase 10; similar with DPP10_HUMAN        |
| Px015790.1 | -1.6407 | 8.72E-18  | 8.82E-17  | Sodium/potassium-transporting ATPase subunit beta-2               |
| Px005341.1 | -1.4819 | 1.93E-101 | 7.46E-100 | Collagenase; similar with COGS_HYPLI                              |
| Px012129.1 | -1.2904 | 2.16E-19  | 2.36E-18  | Lysosomal Pro-X carboxypeptidase; similar with PCP_PONAB          |
| Px008897.1 | -1.2522 | 5.06E-13  | 3.79E-12  | B(0,+)-type amino acid transporter 1; similar with BAT1_HUMAN     |
| Px004622.1 | -1.2131 | 1.22E-41  | 2.45E-40  | Proton-coupled amino acid transporter 4; similar with S36A4_XENLA |
| Px011827.1 | -1.2043 | 3.63E-15  | 3.15E-14  | Proton-coupled amino acid transporter 4; similar with S36A4_XENLA |
| Px008960.1 | -1.1092 | 1.75E-41  | 3.49E-40  | Peptide transporter family 1; similar with PEPT1_DROME            |
| Px003113.1 | -1.0084 | 1.25E-04  | 4.04E-04  | Collagen alpha-1(XV) chain; similar with COFA1_HUMAN              |
| Px001239.1 | -1.0036 | 9.68E-09  | 5.19E-08  | Serine protease P162; similar with D2A5Y8_TRICA                   |

#### Involved in influenza A

|            |         |          |          |                                                    |
|------------|---------|----------|----------|----------------------------------------------------|
| Px015280.1 | 10.8687 | 2.87E-10 | 1.76E-09 | Trypsin CFT-1; similar with TRYP_CHOFU             |
| Px007357.2 | 6.6517  | 0.00E+00 | 0.00E+00 | Serine proteinase stubble; similar with STUB_DROME |
| Px006254.1 | 4.4212  | 6.36E-06 | 2.52E-05 | Chymotrypsin-2; similar with CTR2_ANOGA            |

|            |        |           |           |                                                                      |
|------------|--------|-----------|-----------|----------------------------------------------------------------------|
| Px007620.1 | 3.6327 | 1.75E-08  | 9.13E-08  | Trypsin CFT-1; similar with TRYP_CHOFU                               |
| Px016055.1 | 3.2151 | 6.89E-29  | 1.03E-27  | Trypsin, alkaline C; similar with TRYC_MANSE                         |
| Px003546.1 | 3.1733 | 2.80E-04  | 8.56E-04  | Trypsin, alkaline C; similar with TRYC_MANSE                         |
| Px010386.1 | 2.6772 | 0.00E+00  | 0.00E+00  | Trypsin CFT-1; similar with TRYP_CHOFU                               |
| Px015277.1 | 2.5730 | 1.28E-54  | 3.19E-53  | Trypsin CFT-1; similar with TRYP_CHOFU                               |
| Px015276.1 | 2.5579 | 1.86E-30  | 2.90E-29  | Trypsin CFT-1; similar with TRYP_CHOFU                               |
| Px015514.1 | 2.3827 | 1.35E-06  | 5.80E-06  | Serine/threonine-protein kinase pelle; similar with KPEL_DROME       |
| Px007619.2 | 2.3494 | 0.00E+00  | 0.00E+00  | Trypsin, alkaline A; similar with TRYA_MANSE                         |
| Px014769.1 | 2.3190 | 3.12E-54  | 7.70E-53  | Serine proteinase stubble; similar with STUB_DROME                   |
| Px005241.1 | 2.3004 | 9.73E-13  | 7.17E-12  | Trypsin CFT-1; similar with TRYP_CHOFU                               |
| Px009569.1 | 2.2896 | 2.53E-216 | 1.66E-214 | Trypsin CFT-1; similar with TRYP_CHOFU                               |
| Px010975.1 | 2.2277 | 1.85E-08  | 9.63E-08  | Trypsin, alkaline C; similar with TRYC_MANSE                         |
| Px011887.1 | 2.1323 | 9.63E-147 | 4.78E-145 | Trypsin, alkaline C; similar with TRYC_MANSE                         |
| Px009488.1 | 2.0714 | 3.01E-06  | 1.24E-05  | Chymotrypsin-like serine proteinase; similar with CTRL_HALRU         |
| Px009088.1 | 2.0671 | 8.40E-275 | 6.89E-273 | Mastin; similar with TRYM_CANFA                                      |
| Px007621.1 | 2.0663 | 1.43E-07  | 6.93E-07  | Trypsin CFT-1; similar with TRYP_CHOFU                               |
| Px003670.2 | 2.0614 | 0.00E+00  | 0.00E+00  | Serine protease easter; similar with EAST_DROME                      |
| Px002441.1 | 1.9871 | 4.10E-39  | 7.84E-38  | Trypsin, alkaline B; similar with TRYB_MANSE                         |
| Px006571.1 | 1.9668 | 0.00E+00  | 0.00E+00  | Trypsin, alkaline B; similar with TRYB_MANSE                         |
| Px008538.1 | 1.9379 | 5.30E-72  | 1.61E-70  | Trypsin, alkaline B; similar with TRYB_MANSE                         |
| Px011231.1 | 1.8761 | 1.79E-17  | 1.77E-16  | Protein unc-50 homolog; similar with UNC50_DROME                     |
| Px015278.1 | 1.8699 | 3.08E-11  | 2.04E-10  | Trypsin, alkaline A; similar with TRYA_MANSE                         |
| Px014830.1 | 1.8574 | 0.00E+00  | 0.00E+00  | Tryptase; similar with TRYB1_MOUSE                                   |
| Px015420.2 | 1.8484 | 1.34E-11  | 9.04E-11  | Putative uncharacterized protein; similar with Q171T2_AEDAE          |
| Px009568.1 | 1.8431 | 6.70E-05  | 2.27E-04  | Trypsin, alkaline C; similar with TRYC_MANSE                         |
| Px011499.2 | 1.7910 | 6.11E-19  | 6.55E-18  | Serine protease persephone; similar with PSH_DROME                   |
| Px001833.1 | 1.7864 | 0.00E+00  | 0.00E+00  | Serine protease easter; similar with EAST_DROME                      |
| Px017515.1 | 1.7186 | 1.09E-80  | 3.60E-79  | Trypsin, alkaline C; similar with TRYC_MANSE                         |
| Px007598.1 | 1.6692 | 9.57E-31  | 1.50E-29  | Chymotrypsin-1; similar with CTR1_ANOGA                              |
| Px002457.1 | 1.6591 | 3.55E-58  | 9.23E-57  | Protein dpy-19 homolog 1; similar with D19L1_HUMAN                   |
| Px005240.1 | 1.6409 | 7.98E-17  | 7.63E-16  | Trypsin, alkaline A; similar with TRYA_MANSE                         |
| Px005242.1 | 1.6327 | 5.68E-10  | 3.38E-09  | Trypsin CFT-1; similar with TRYP_CHOFU                               |
| Px000107.1 | 1.5952 | 7.26E-250 | 5.34E-248 | Trypsin, alkaline C; similar with TRYC_MANSE                         |
| Px014882.1 | 1.5792 | 1.59E-27  | 2.28E-26  | Trypsin, alkaline C; similar with TRYC_MANSE                         |
| Px015275.1 | 1.5751 | 0.00E+00  | 0.00E+00  | Trypsin CFT-1; similar with TRYP_CHOFU                               |
| Px007616.1 | 1.5713 | 2.75E-83  | 9.34E-82  | Trypsin CFT-1; similar with TRYP_CHOFU                               |
| Px006837.1 | 1.5701 | 7.52E-08  | 3.72E-07  | Serine/threonine-protein kinase pelle; similar with KPEL_DROME       |
| Px006572.1 | 1.5612 | 0.00E+00  | 0.00E+00  | Trypsin; similar with TRYP_PHACE                                     |
| Px013377.1 | 1.5480 | 1.88E-43  | 3.82E-42  | Trypsin; similar with TRYP_PHACE                                     |
| Px016057.1 | 1.5292 | 2.72E-23  | 3.45E-22  | Trypsin, alkaline B; similar with TRYB_MANSE                         |
| Px005936.2 | 1.5008 | 1.12E-40  | 2.19E-39  | Trypsin, alkaline C; similar with TRYC_MANSE                         |
| Px005243.1 | 1.4820 | 0.00E+00  | 0.00E+00  | Trypsin, alkaline A; similar with TRYA_MANSE                         |
| Px012568.1 | 1.4572 | 4.65E-123 | 2.06E-121 | Trypsin CFT-1; similar with TRYP_CHOFU                               |
| Px005765.1 | 1.4516 | 5.48E-18  | 5.59E-17  | Vitellin-degrading protease; similar with VDP_BOMMO                  |
| Px002440.1 | 1.4335 | 9.19E-09  | 4.93E-08  | Trypsin, alkaline B; similar with TRYB_MANSE                         |
| Px010499.1 | 1.4285 | 6.21E-12  | 4.30E-11  | Serine/threonine-protein kinase pelle; similar with KPEL_DROME       |
| Px014534.1 | 1.4237 | 7.49E-32  | 1.21E-30  | Trypsin CFT-1; similar with TRYP_CHOFU                               |
| Px016058.1 | 1.3964 | 2.20E-207 | 1.39E-205 | Trypsin, alkaline C; similar with TRYC_MANSE                         |
| Px003671.1 | 1.3824 | 8.09E-185 | 4.69E-183 | Serine protease easter; similar with EAST_DROME                      |
| Px009638.1 | 1.3782 | 0.00E+00  | 0.00E+00  | Trypsin, alkaline B; similar with TRYB_MANSE                         |
| Px014831.2 | 1.3474 | 0.00E+00  | 0.00E+00  | Serine proteinase stubble; similar with STUB_DROME                   |
| Px016054.1 | 1.3362 | 5.17E-08  | 2.60E-07  | Trypsin; similar with TRYP_PHACE                                     |
| Px003725.1 | 1.3049 | 1.92E-25  | 2.59E-24  | Interleukin-1 receptor-associated kinase 4; similar with IRAK4_BOVIN |
| Px009639.1 | 1.2774 | 0.00E+00  | 0.00E+00  | Trypsin CFT-1; similar with TRYP_CHOFU                               |

|            |         |           |           |                                                                               |
|------------|---------|-----------|-----------|-------------------------------------------------------------------------------|
| Px002588.1 | 1.2360  | 9.87E-07  | 4.33E-06  | Trypsin, alkaline C; similar with TRYC_MANSE                                  |
| Px010215.1 | 1.1967  | 4.17E-08  | 2.11E-07  | GK12675; similar with B4N3B5_DROWI                                            |
| Px009395.1 | 1.1916  | 1.32E-05  | 5.00E-05  | Proclotting enzyme; similar with PCE_TACTR                                    |
| Px011886.1 | 1.1422  | 3.65E-31  | 5.79E-30  | Trypsin CFT-1; similar with TRYP_CHOFU                                        |
| Px016056.1 | 1.1375  | 0.00E+00  | 0.00E+00  | Trypsin, alkaline A; similar with TRYA_MANSE                                  |
| Px007552.1 | 1.1328  | 6.14E-24  | 7.92E-23  | Paramyosin, putative; similar with E0VGP7_PEDHC                               |
| Px013299.1 | 1.1172  | 3.69E-82  | 1.25E-80  | Serine proteinase stubble; similar with STUB_DROME                            |
| Px011525.1 | 1.1167  | 5.60E-05  | 1.93E-04  | Programmed cell death protein 4; similar with PDCD4_CHICK                     |
| Px000402.2 | 1.1008  | 8.17E-19  | 8.68E-18  | Serine protease persephone; similar with PSH_DROME                            |
| Px012329.1 | 1.0969  | 2.64E-32  | 4.31E-31  | Serine protease persephone; similar with PSH_DROME                            |
| Px007599.1 | 1.0927  | 0.00E+00  | 0.00E+00  | Chymotrypsin-1; similar with CTR1_ANOGA                                       |
| Px008682.1 | 1.0369  | 3.84E-06  | 1.57E-05  | Coagulation factor XI; similar with FA11_HUMAN                                |
| Px007600.1 | 1.0192  | 1.33E-52  | 3.21E-51  | Chymotrypsin-1; similar with CTR1_ANOGA                                       |
| Px013146.1 | -9.6079 | 4.14E-05  | 1.46E-04  | Trypsin; similar with TRYP_PHACE                                              |
| Px012497.1 | -9.3373 | 1.47E-04  | 4.73E-04  | Trypsin-4; similar with TRY4_ANOGA                                            |
| Px006973.1 | -9.2055 | 1.16E-05  | 4.44E-05  | N-chimaerin; similar with CHIN_MOUSE                                          |
| Px017492.1 | -8.9602 | 3.86E-08  | 1.96E-07  | Trypsin CFT-1; similar with TRYP_CHOFU                                        |
| Px001873.1 | -3.7809 | 4.04E-07  | 1.86E-06  | Probable palmitoyltransferase ZDHHC8; similar with ZDHC8_MOUSE                |
| Px008406.1 | -2.8856 | 5.90E-05  | 2.02E-04  | Serine proteinase stubble; similar with STUB_DROME                            |
| Px016566.1 | -2.8663 | 2.04E-12  | 1.47E-11  | Stress-activated protein kinase JNK; similar with JNK_DROME                   |
| Px017197.1 | -2.4334 | 9.91E-10  | 5.78E-09  | Importin subunit alpha-2; similar with IMA2_XENLA                             |
| Px006373.1 | -2.0343 | 3.88E-11  | 2.54E-10  | Exportin-6; similar with XPO6_HUMAN                                           |
| Px008253.1 | -2.0121 | 2.22E-15  | 1.95E-14  | Dual specificity mitogen-activated protein kinase kinase                      |
| Px016551.1 | -1.9820 | 6.52E-11  | 4.20E-10  | ADP,ATP carrier protein; similar with ADT_DROME                               |
| Px007415.2 | -1.9501 | 8.10E-19  | 8.60E-18  | Furin-like protease 1, isoforms 1/1-X/2; similar with FUR11_DROME             |
| Px015661.1 | -1.8624 | 5.93E-05  | 2.03E-04  | Putative uncharacterized protein; similar with D6WEM6_TRICA                   |
| Px011097.1 | -1.8357 | 1.53E-15  | 1.35E-14  | Serine proteinase stubble; similar with STUB_DROME                            |
| Px009586.1 | -1.6809 | 2.27E-12  | 1.63E-11  | Phosphatidylinositol 3-kinase regulatory subunit gamma                        |
| Px008563.1 | -1.6326 | 5.35E-37  | 9.82E-36  | Interferon-inducible double stranded RNA-dependent protein kinase activator A |
| Px005341.1 | -1.4819 | 1.93E-101 | 7.46E-100 | Collagenase; similar with COGS_HYPLI                                          |
| Px007700.1 | -1.4344 | 2.81E-13  | 2.14E-12  | Nuclear RNA export factor 1; similar with NXF1_DROME                          |
| Px008372.1 | -1.4221 | 6.98E-10  | 4.12E-09  | Phosphatidylinositol-4,5-bisphosphate 3-kinase catalytic subunit beta isoform |
| Px011968.1 | -1.3855 | 8.91E-08  | 4.39E-07  | Serine/threonine-protein kinase gcn2; similar with GCN2_SCHPO                 |
| Px014044.1 | -1.2823 | 1.15E-58  | 3.02E-57  | Putative uncharacterized protein; similar with C4JWW1_UNCRE                   |
| Px016832.3 | -1.2819 | 2.88E-10  | 1.77E-09  | Stress-activated protein kinase JNK; similar with JNK_DROME                   |
| Px008701.1 | -1.2418 | 6.12E-09  | 3.33E-08  | Nuclear RNA export factor 1; similar with NXF1_BOVIN                          |
| Px017224.1 | -1.2107 | 1.29E-11  | 8.76E-11  | Chaoptin; similar with CHAO_DROME                                             |
| Px001125.2 | -1.2097 | 1.33E-10  | 8.38E-10  |                                                                               |
| Px007910.1 | -1.1600 | 6.95E-41  | 1.37E-39  | Glycogen synthase kinase-3 beta; similar with GSK3B_MOUSE                     |
| Px005271.1 | -1.0149 | 8.65E-23  | 1.08E-21  | Putative cuticle protein; similar with C0H6P8_BOMMO                           |
| Px001239.1 | -1.0036 | 9.68E-09  | 5.19E-08  | Serine protease P162; similar with D2A5Y8_TRICA                               |
| Px001973.2 | -1.0031 | 2.49E-05  | 9.07E-05  | Tetratricopeptide repeat protein 5; similar with TTC5_HUMAN                   |

### Involved in pancreatic secretion

|            |         |          |          |                                                    |
|------------|---------|----------|----------|----------------------------------------------------|
| Px015280.1 | 10.8687 | 2.87E-10 | 1.76E-09 | Trypsin CFT-1; similar with TRYP_CHOFU             |
| Px007357.2 | 6.6517  | 0.00E+00 | 0.00E+00 | Serine proteinase stubble; similar with STUB_DROME |
| Px006254.1 | 4.4212  | 6.36E-06 | 2.52E-05 | Chymotrypsin-2; similar with CTR2_ANOGA            |
| Px007620.1 | 3.6327  | 1.75E-08 | 9.13E-08 | Trypsin CFT-1; similar with TRYP_CHOFU             |
| Px016055.1 | 3.2151  | 6.89E-29 | 1.03E-27 | Trypsin, alkaline C; similar with TRYC_MANSE       |
| Px003546.1 | 3.1733  | 2.80E-04 | 8.56E-04 | Trypsin, alkaline C; similar with TRYC_MANSE       |
| Px005387.1 | 2.8362  | 1.64E-04 | 5.24E-04 | 85 kDa calcium-independent phospholipase A2        |
| Px010386.1 | 2.6772  | 0.00E+00 | 0.00E+00 | Trypsin CFT-1; similar with TRYP_CHOFU             |
| Px015277.1 | 2.5730  | 1.28E-54 | 3.19E-53 | Trypsin CFT-1; similar with TRYP_CHOFU             |
| Px015276.1 | 2.5579  | 1.86E-30 | 2.90E-29 | Trypsin CFT-1; similar with TRYP_CHOFU             |

|            |        |           |           |                                                               |
|------------|--------|-----------|-----------|---------------------------------------------------------------|
| Px006441.1 | 2.4123 | 0.00E+00  | 0.00E+00  | Lipase member H; similar with LIPH_RAT                        |
| Px007619.2 | 2.3494 | 0.00E+00  | 0.00E+00  | Trypsin, alkaline A; similar with TRYA_MANSE                  |
| Px014769.1 | 2.3190 | 3.12E-54  | 7.70E-53  | Serine proteinase stubble; similar with STUB_DROME            |
| Px005241.1 | 2.3004 | 9.73E-13  | 7.17E-12  | Trypsin CFT-1; similar with TRYP_CHOFU                        |
| Px009569.1 | 2.2896 | 2.53E-216 | 1.66E-214 | Trypsin CFT-1; similar with TRYP_CHOFU                        |
| Px010975.1 | 2.2277 | 1.85E-08  | 9.63E-08  | Trypsin, alkaline C; similar with TRYC_MANSE                  |
| Px011887.1 | 2.1323 | 9.63E-147 | 4.78E-145 | Trypsin, alkaline C; similar with TRYC_MANSE                  |
| Px009488.1 | 2.0714 | 3.01E-06  | 1.24E-05  | Chymotrypsin-like serine proteinase; similar with CTRL_HALRU  |
| Px009088.1 | 2.0671 | 8.40E-275 | 6.89E-273 | Mastin; similar with TRYM_CANFA                               |
| Px007621.1 | 2.0663 | 1.43E-07  | 6.93E-07  | Trypsin CFT-1; similar with TRYP_CHOFU                        |
| Px003670.2 | 2.0614 | 0.00E+00  | 0.00E+00  | Serine protease easter; similar with EAST_DROME               |
| Px002441.1 | 1.9871 | 4.10E-39  | 7.84E-38  | Trypsin, alkaline B; similar with TRYB_MANSE                  |
| Px006571.1 | 1.9668 | 0.00E+00  | 0.00E+00  | Trypsin, alkaline B; similar with TRYB_MANSE                  |
| Px008538.1 | 1.9379 | 5.30E-72  | 1.61E-70  | Trypsin, alkaline B; similar with TRYB_MANSE                  |
| Px011231.1 | 1.8761 | 1.79E-17  | 1.77E-16  | Protein unc-50 homolog; similar with UNC50_DROME              |
| Px015278.1 | 1.8699 | 3.08E-11  | 2.04E-10  | Trypsin, alkaline A; similar with TRYA_MANSE                  |
| Px014830.1 | 1.8574 | 0.00E+00  | 0.00E+00  | Tryptase; similar with TRYB1_MOUSE                            |
| Px009568.1 | 1.8431 | 6.70E-05  | 2.27E-04  | Trypsin, alkaline C; similar with TRYC_MANSE                  |
| Px012011.2 | 1.8280 | 7.99E-205 | 5.04E-203 | Pancreatic triacylglycerol lipase; similar with LIPP_MYOCO    |
| Px001990.2 | 1.7922 | 1.40E-22  | 1.73E-21  | Carboxypeptidase B; similar with CBPB_ASTFL                   |
| Px011499.2 | 1.7910 | 6.11E-19  | 6.55E-18  | Serine protease persephone; similar with PSH_DROME            |
| Px001833.1 | 1.7864 | 0.00E+00  | 0.00E+00  | Serine protease easter; similar with EAST_DROME               |
| Px017515.1 | 1.7186 | 1.09E-80  | 3.60E-79  | Trypsin, alkaline C; similar with TRYC_MANSE                  |
| Px007598.1 | 1.6692 | 9.57E-31  | 1.50E-29  | Chymotrypsin-1; similar with CTR1_ANOGA                       |
| Px005240.1 | 1.6409 | 7.98E-17  | 7.63E-16  | Trypsin, alkaline A; similar with TRYA_MANSE                  |
| Px005242.1 | 1.6327 | 5.68E-10  | 3.38E-09  | Trypsin CFT-1; similar with TRYP_CHOFU                        |
| Px000107.1 | 1.5952 | 7.26E-250 | 5.34E-248 | Trypsin, alkaline C; similar with TRYC_MANSE                  |
| Px000104.1 | 1.5842 | 4.20E-11  | 2.75E-10  | Pancreatic lipase-related protein 2; similar with LIPR2_CAVPO |
| Px014882.1 | 1.5792 | 1.59E-27  | 2.28E-26  | Trypsin, alkaline C; similar with TRYC_MANSE                  |
| Px015275.1 | 1.5751 | 0.00E+00  | 0.00E+00  | Trypsin CFT-1; similar with TRYP_CHOFU                        |
| Px007616.1 | 1.5713 | 2.75E-83  | 9.34E-82  | Trypsin CFT-1; similar with TRYP_CHOFU                        |
| Px006572.1 | 1.5612 | 0.00E+00  | 0.00E+00  | Trypsin; similar with TRYP_PHACE                              |
| Px013377.1 | 1.5480 | 1.88E-43  | 3.82E-42  | Trypsin; similar with TRYP_PHACE                              |
| Px016057.1 | 1.5292 | 2.72E-23  | 3.45E-22  | Trypsin, alkaline B; similar with TRYB_MANSE                  |
| Px012048.1 | 1.5055 | 2.98E-12  | 2.12E-11  | Chymotrypsin BI; similar with CTRB1_LITVA                     |
| Px005936.2 | 1.5008 | 1.12E-40  | 2.19E-39  | Trypsin, alkaline C; similar with TRYC_MANSE                  |
| Px000996.2 | 1.4897 | 7.66E-31  | 1.21E-29  | Carboxypeptidase A2; similar with CBPA2_MOUSE                 |
| Px005243.1 | 1.4820 | 0.00E+00  | 0.00E+00  | Trypsin, alkaline A; similar with TRYA_MANSE                  |
| Px012568.1 | 1.4572 | 4.65E-123 | 2.06E-121 | Trypsin CFT-1; similar with TRYP_CHOFU                        |
| Px005765.1 | 1.4516 | 5.48E-18  | 5.59E-17  | Vitellin-degrading protease; similar with VDP_BOMMO           |
| Px002440.1 | 1.4335 | 9.19E-09  | 4.93E-08  | Trypsin, alkaline B; similar with TRYB_MANSE                  |
| Px014534.1 | 1.4237 | 7.49E-32  | 1.21E-30  | Trypsin CFT-1; similar with TRYP_CHOFU                        |
| Px016058.1 | 1.3964 | 2.20E-207 | 1.39E-205 | Trypsin, alkaline C; similar with TRYC_MANSE                  |
| Px003671.1 | 1.3824 | 8.09E-185 | 4.69E-183 | Serine protease easter; similar with EAST_DROME               |
| Px009638.1 | 1.3782 | 0.00E+00  | 0.00E+00  | Trypsin, alkaline B; similar with TRYB_MANSE                  |
| Px014831.2 | 1.3474 | 0.00E+00  | 0.00E+00  | Serine proteinase stubble; similar with STUB_DROME            |
| Px000991.6 | 1.3435 | 4.35E-64  | 1.21E-62  | Carboxypeptidase O; similar with CBPO_BOVIN                   |
| Px016054.1 | 1.3362 | 5.17E-08  | 2.60E-07  | Trypsin; similar with TRYP_PHACE                              |
| Px007900.1 | 1.2849 | 0.00E+00  | 0.00E+00  | Chymotrypsin BI; similar with CTRB1_LITVA                     |
| Px009639.1 | 1.2774 | 0.00E+00  | 0.00E+00  | Trypsin CFT-1; similar with TRYP_CHOFU                        |
| Px002588.1 | 1.2360 | 9.87E-07  | 4.33E-06  | Trypsin, alkaline C; similar with TRYC_MANSE                  |
| Px006190.1 | 1.2352 | 0.00E+00  | 0.00E+00  | Lipase member H-A; similar with LIPHA_XENLA                   |
| Px004751.1 | 1.2094 | 5.26E-200 | 3.23E-198 | Pancreatic triacylglycerol lipase; similar with LIPP_HUMAN    |
| Px004750.1 | 1.2088 | 0.00E+00  | 0.00E+00  | Pancreatic lipase-related protein 2; similar with LIPR2_RAT   |

|            |         |           |           |                                                                      |
|------------|---------|-----------|-----------|----------------------------------------------------------------------|
| Px009395.1 | 1.1916  | 1.32E-05  | 5.00E-05  | Proclotting enzyme; similar with PCE_TACTR                           |
| Px003352.1 | 1.1571  | 6.22E-06  | 2.47E-05  | Venom carboxylesterase-6; similar with EST6_APIME                    |
| Px011886.1 | 1.1422  | 3.65E-31  | 5.79E-30  | Trypsin CFT-1; similar with TRYP_CHOFU                               |
| Px016056.1 | 1.1375  | 0.00E+00  | 0.00E+00  | Trypsin, alkaline A; similar with TRYA_MANSE                         |
| Px007013.1 | 1.1364  | 1.76E-22  | 2.18E-21  | Group XIIA secretory phospholipase A2; similar with PG12A_MOUSE      |
| Px013299.1 | 1.1172  | 3.69E-82  | 1.25E-80  | Serine proteinase stubble; similar with STUB_DROME                   |
| Px000402.2 | 1.1008  | 8.17E-19  | 8.68E-18  | Serine protease persephone; similar with PSH_DROME                   |
| Px012329.1 | 1.0969  | 2.64E-32  | 4.31E-31  | Serine protease persephone; similar with PSH_DROME                   |
| Px007599.1 | 1.0927  | 0.00E+00  | 0.00E+00  | Chymotrypsin-1; similar with CTR1_ANOGA                              |
| Px004815.1 | 1.0516  | 7.04E-07  | 3.16E-06  | Gut esterase 1; similar with EST1_CAEEL                              |
| Px000993.1 | 1.0428  | 2.30E-209 | 1.47E-207 | Carboxypeptidase A2; similar with CBPA2_RAT                          |
| Px012176.1 | 1.0278  | 5.64E-07  | 2.56E-06  | JmjC domain-containing protein 7; similar with JMJD7_MOUSE           |
| Px007600.1 | 1.0192  | 1.33E-52  | 3.21E-51  | Chymotrypsin-1; similar with CTR1_ANOGA                              |
| Px012191.1 | 1.0108  | 5.91E-126 | 2.65E-124 | Sodium/potassium-transporting ATPase subunit alpha-                  |
| Px013146.1 | -9.6079 | 4.14E-05  | 1.46E-04  | Trypsin; similar with TRYP_PHACE                                     |
| Px012497.1 | -9.3373 | 1.47E-04  | 4.73E-04  | Trypsin-4; similar with TRY4_ANOGA                                   |
| Px017492.1 | -8.9602 | 3.86E-08  | 1.96E-07  | Trypsin CFT-1; similar with TRYP_CHOFU                               |
| Px008406.1 | -2.8856 | 5.90E-05  | 2.02E-04  | Serine proteinase stubble; similar with STUB_DROME                   |
| Px013802.1 | -2.8624 | 2.15E-07  | 1.03E-06  | Sodium/potassium-transporting ATPase subunit alpha-                  |
| Px003127.1 | -2.3413 | 4.59E-06  | 1.86E-05  | Adenylate cyclase type 3; similar with ADCY3_HUMAN                   |
| Px002439.1 | -2.2418 | 7.00E-05  | 2.37E-04  | 85 kDa calcium-independent phospholipase                             |
| Px004992.1 | -1.9311 | 2.49E-05  | 9.07E-05  | Bumetanide-sensitive sodium-(potassium)-chloride cotransporte        |
| Px003969.1 | -1.8898 | 4.45E-12  | 3.12E-11  | Plasma membrane calcium-transporting ATPase                          |
| Px005825.1 | -1.8565 | 1.12E-05  | 4.31E-05  | 1-phosphatidylinositol-4,5-bisphosphate phosphodiesteras             |
| Px011097.1 | -1.8357 | 1.53E-15  | 1.35E-14  | Serine proteinase stubble; similar with STUB_DROME                   |
| Px005762.1 | -1.7861 | 3.28E-16  | 3.03E-15  | Guanine nucleotide-binding protein G(q) subunit alph                 |
| Px010907.1 | -1.7829 | 6.97E-137 | 3.29E-135 | Putative uncharacterized protein; similar with D6WJ01_TRICA          |
| Px015790.1 | -1.6407 | 8.72E-18  | 8.82E-17  | Sodium/potassium-transporting ATPase subunit beta-                   |
| Px003776.1 | -1.4897 | 2.57E-06  | 1.07E-05  | TBC1 domain family member 30; similar with TBC30_XENTR               |
| Px005341.1 | -1.4819 | 1.93E-101 | 7.46E-100 | Collagenase; similar with COGS_HYPLI                                 |
| Px003970.1 | -1.4540 | 0.00E+00  | 0.00E+00  | Plasma membrane calcium-transporting ATPase                          |
| Px001942.1 | -1.3215 | 3.99E-50  | 9.31E-49  | Carbonic anhydrase 2; similar with CAH2_MOUSE                        |
| Px000263.1 | -1.2220 | 3.11E-07  | 1.45E-06  | Ras-related protein Rac1; similar with RAC1_DROME                    |
| Px016332.1 | -1.2199 | 0.00E+00  | 0.00E+00  | Calcium-transporting ATPase sarcoplasmic/endoplasmic reticulum typ   |
| Px011757.1 | -1.1422 | 5.15E-16  | 4.70E-15  | Esterase FE4; similar with ESTF_MYZPE                                |
| Px005612.4 | -1.1210 | 6.66E-20  | 7.47E-19  | Calcium-activated potassium channel slowpoke; similar with SLO_DROME |
| Px004044.1 | -1.0654 | 5.33E-21  | 6.26E-20  | Juvenile hormone esterase; similar with ESTJ_HELVI                   |
| Px001239.1 | -1.0036 | 9.68E-09  | 5.19E-08  | Serine protease P162; similar with D2A5Y8_TRICA                      |

### Involved in neuroactive ligand-receptor interaction

|            |         |          |          |                                                             |
|------------|---------|----------|----------|-------------------------------------------------------------|
| Px015280.1 | 10.8687 | 2.87E-10 | 1.76E-09 | Trypsin CFT-1; similar with TRYP_CHOFU                      |
| Px014235.1 | 8.8173  | 2.67E-08 | 1.37E-07 | Putative chemosensory ionotropic receptor IR41a             |
| Px007357.2 | 6.6517  | 0.00E+00 | 0.00E+00 | Serine proteinase stubble; similar with STUB_DROME          |
| Px006831.1 | 6.1494  | 0.00E+00 | 0.00E+00 | Putative uncharacterized protein; similar with D6X0U7_TRICA |
| Px006254.1 | 4.4212  | 6.36E-06 | 2.52E-05 | Chymotrypsin-2; similar with CTR2_ANOGA                     |
| Px008696.1 | 4.2465  | 3.05E-26 | 4.22E-25 | Osiris 9; similar with B6DXB0_BOMMO                         |
| Px007620.1 | 3.6327  | 1.75E-08 | 9.13E-08 | Trypsin CFT-1; similar with TRYP_CHOFU                      |
| Px016055.1 | 3.2151  | 6.89E-29 | 1.03E-27 | Trypsin, alkaline C; similar with TRYC_MANSE                |
| Px003546.1 | 3.1733  | 2.80E-04 | 8.56E-04 | Trypsin, alkaline C; similar with TRYC_MANSE                |
| Px000336.1 | 2.9575  | 1.37E-12 | 9.98E-12 | Osiris 20; similar with B6DXA7_BOMMO                        |
| Px010386.1 | 2.6772  | 0.00E+00 | 0.00E+00 | Trypsin CFT-1; similar with TRYP_CHOFU                      |
| Px006629.1 | 2.6327  | 9.17E-05 | 3.04E-04 | Retrotransposable element Tf2 155 kDa protein type 3        |
| Px015277.1 | 2.5730  | 1.28E-54 | 3.19E-53 | Trypsin CFT-1; similar with TRYP_CHOFU                      |
| Px015276.1 | 2.5579  | 1.86E-30 | 2.90E-29 | Trypsin CFT-1; similar with TRYP_CHOFU                      |



|            |        |           |           |                                                                   |
|------------|--------|-----------|-----------|-------------------------------------------------------------------|
| Px008529.1 | 2.4352 | 3.69E-39  | 7.07E-38  | Thyrotropin-releasing hormone receptor; similar with TRFR_CHICK   |
| Px011101.1 | 2.3787 | 5.60E-77  | 1.78E-75  | Coagulation factor X; similar with FA10_RAT                       |
| Px007619.2 | 2.3494 | 0.00E+00  | 0.00E+00  | Trypsin, alkaline A; similar with TRYA_MANSE                      |
| Px014769.1 | 2.3190 | 3.12E-54  | 7.70E-53  | Serine proteinase stubble; similar with STUB_DROME                |
| Px005241.1 | 2.3004 | 9.73E-13  | 7.17E-12  | Trypsin CFT-1; similar with TRYP_CHOFU                            |
| Px009569.1 | 2.2896 | 2.53E-216 | 1.66E-214 | Trypsin CFT-1; similar with TRYP_CHOFU                            |
| Px010975.1 | 2.2277 | 1.85E-08  | 9.63E-08  | Trypsin, alkaline C; similar with TRYC_MANSE                      |
| Px016100.1 | 2.1921 | 3.26E-21  | 3.85E-20  | Coagulation factor IX; similar with FA9_RABIT                     |
| Px011887.1 | 2.1323 | 9.63E-147 | 4.78E-145 | Trypsin, alkaline C; similar with TRYC_MANSE                      |
| Px009488.1 | 2.0714 | 3.01E-06  | 1.24E-05  | Chymotrypsin-like serine proteinase; similar with CTRL_HALRU      |
| Px009088.1 | 2.0671 | 8.40E-275 | 6.89E-273 | Mastin; similar with TRYM_CANFA                                   |
| Px007621.1 | 2.0663 | 1.43E-07  | 6.93E-07  | Trypsin CFT-1; similar with TRYP_CHOFU                            |
| Px003670.2 | 2.0614 | 0.00E+00  | 0.00E+00  | Serine protease easter; similar with EAST_DROME                   |
| Px002441.1 | 1.9871 | 4.10E-39  | 7.84E-38  | Trypsin, alkaline B; similar with TRYB_MANSE                      |
| Px006571.1 | 1.9668 | 0.00E+00  | 0.00E+00  | Trypsin, alkaline B; similar with TRYB_MANSE                      |
| Px008538.1 | 1.9379 | 5.30E-72  | 1.61E-70  | Trypsin, alkaline B; similar with TRYB_MANSE                      |
| Px011231.1 | 1.8761 | 1.79E-17  | 1.77E-16  | Protein unc-50 homolog; similar with UNC50_DROME                  |
| Px015278.1 | 1.8699 | 3.08E-11  | 2.04E-10  | Trypsin, alkaline A; similar with TRYA_MANSE                      |
| Px014830.1 | 1.8574 | 0.00E+00  | 0.00E+00  | Tryptase; similar with TRYB1_MOUSE                                |
| Px009568.1 | 1.8431 | 6.70E-05  | 2.27E-04  | Trypsin, alkaline C; similar with TRYC_MANSE                      |
| Px011499.2 | 1.7910 | 6.11E-19  | 6.55E-18  | Serine protease persephone; similar with PSH_DROME                |
| Px001833.1 | 1.7864 | 0.00E+00  | 0.00E+00  | Serine protease easter; similar with EAST_DROME                   |
| Px007383.1 | 1.7582 | 1.80E-04  | 5.69E-04  | PDF receptor; similar with PDFR_DROME                             |
| Px017515.1 | 1.7186 | 1.09E-80  | 3.60E-79  | Trypsin, alkaline C; similar with TRYC_MANSE                      |
| Px007598.1 | 1.6692 | 9.57E-31  | 1.50E-29  | Chymotrypsin-1; similar with CTR1_ANOGA                           |
| Px005240.1 | 1.6409 | 7.98E-17  | 7.63E-16  | Trypsin, alkaline A; similar with TRYA_MANSE                      |
| Px005242.1 | 1.6327 | 5.68E-10  | 3.38E-09  | Trypsin CFT-1; similar with TRYP_CHOFU                            |
| Px000107.1 | 1.5952 | 7.26E-250 | 5.34E-248 | Trypsin, alkaline C; similar with TRYC_MANSE                      |
| Px014882.1 | 1.5792 | 1.59E-27  | 2.28E-26  | Trypsin, alkaline C; similar with TRYC_MANSE                      |
| Px015275.1 | 1.5751 | 0.00E+00  | 0.00E+00  | Trypsin CFT-1; similar with TRYP_CHOFU                            |
| Px007616.1 | 1.5713 | 2.75E-83  | 9.34E-82  | Trypsin CFT-1; similar with TRYP_CHOFU                            |
| Px006572.1 | 1.5612 | 0.00E+00  | 0.00E+00  | Trypsin; similar with TRYP_PHACE                                  |
| Px013377.1 | 1.5480 | 1.88E-43  | 3.82E-42  | Trypsin; similar with TRYP_PHACE                                  |
| Px016057.1 | 1.5292 | 2.72E-23  | 3.45E-22  | Trypsin, alkaline B; similar with TRYB_MANSE                      |
| Px005936.2 | 1.5008 | 1.12E-40  | 2.19E-39  | Trypsin, alkaline C; similar with TRYC_MANSE                      |
| Px005243.1 | 1.4820 | 0.00E+00  | 0.00E+00  | Trypsin, alkaline A; similar with TRYA_MANSE                      |
| Px012568.1 | 1.4572 | 4.65E-123 | 2.06E-121 | Trypsin CFT-1; similar with TRYP_CHOFU                            |
| Px005765.1 | 1.4516 | 5.48E-18  | 5.59E-17  | Vitellin-degrading protease; similar with VDP_BOMMO               |
| Px002440.1 | 1.4335 | 9.19E-09  | 4.93E-08  | Trypsin, alkaline B; similar with TRYB_MANSE                      |
| Px000584.1 | 1.4237 | 7.49E-32  | 1.21E-30  | Coagulation factor X; similar with FA10_RAT                       |
| Px014534.1 | 1.4237 | 7.49E-32  | 1.21E-30  | Trypsin CFT-1; similar with TRYP_CHOFU                            |
| Px016058.1 | 1.3964 | 2.20E-207 | 1.39E-205 | Trypsin, alkaline C; similar with TRYC_MANSE                      |
| Px003671.1 | 1.3824 | 8.09E-185 | 4.69E-183 | Serine protease easter; similar with EAST_DROME                   |
| Px009638.1 | 1.3782 | 0.00E+00  | 0.00E+00  | Trypsin, alkaline B; similar with TRYB_MANSE                      |
| Px014831.2 | 1.3474 | 0.00E+00  | 0.00E+00  | Serine proteinase stubble; similar with STUB_DROME                |
| Px016054.1 | 1.3362 | 5.17E-08  | 2.60E-07  | Trypsin; similar with TRYP_PHACE                                  |
| Px008729.3 | 1.3325 | 1.21E-05  | 4.60E-05  | Retrotransposable element Tf2 155 kDa protein type                |
| Px009639.1 | 1.2774 | 0.00E+00  | 0.00E+00  | Trypsin CFT-1; similar with TRYP_CHOFU                            |
| Px005349.1 | 1.2454 | 7.44E-11  | 4.78E-10  | G-protein coupled receptor moody; similar with MOODY_DROME        |
| Px002588.1 | 1.2360 | 9.87E-07  | 4.33E-06  | Trypsin, alkaline C; similar with TRYC_MANSE                      |
| Px005447.1 | 1.2327 | 3.07E-47  | 6.74E-46  | Gonadotropin-releasing hormone receptor; similar with GNRHR_OCTVU |
| Px009395.1 | 1.1916 | 1.32E-05  | 5.00E-05  | Proclotting enzyme; similar with PCE_TACTR                        |
| Px011886.1 | 1.1422 | 3.65E-31  | 5.79E-30  | Trypsin CFT-1; similar with TRYP_CHOFU                            |
| Px016056.1 | 1.1375 | 0.00E+00  | 0.00E+00  | Trypsin, alkaline A; similar with TRYA_MANSE                      |

|            |         |           |           |                                                                      |
|------------|---------|-----------|-----------|----------------------------------------------------------------------|
| Px013299.1 | 1.1172  | 3.69E-82  | 1.25E-80  | Serine proteinase stubble; similar with STUB_DROME                   |
| Px000402.2 | 1.1008  | 8.17E-19  | 8.68E-18  | Serine protease persephone; similar with PSH_DROME                   |
| Px012329.1 | 1.0969  | 2.64E-32  | 4.31E-31  | Serine protease persephone; similar with PSH_DROME                   |
| Px007599.1 | 1.0927  | 0.00E+00  | 0.00E+00  | Chymotrypsin-1; similar with CTR1_ANOGA                              |
| Px007600.1 | 1.0192  | 1.33E-52  | 3.21E-51  | Chymotrypsin-1; similar with CTR1_ANOGA                              |
| Px013146.1 | -9.6079 | 4.14E-05  | 1.46E-04  | Trypsin; similar with TRYP_PHACE                                     |
| Px012497.1 | -9.3373 | 1.47E-04  | 4.73E-04  | Trypsin-4; similar with TRY4_ANOGA                                   |
| Px017492.1 | -8.9602 | 3.86E-08  | 1.96E-07  | Trypsin CFT-1; similar with TRYP_CHOFU                               |
| Px007162.1 | -8.7968 | 1.16E-05  | 4.44E-05  | 5-hydroxytryptamine receptor 2B; similar with 5HT2B_TETFL            |
| Px011547.1 | -3.3292 | 4.37E-07  | 2.00E-06  | Putative uncharacterized protein; similar with D6X0T4_TRICA          |
| Px008406.1 | -2.8856 | 5.90E-05  | 2.02E-04  | Serine proteinase stubble; similar with STUB_DROME                   |
| Px014294.1 | -2.8267 | 3.64E-07  | 1.69E-06  | FMRFamide receptor; similar with FMAR_DROME                          |
| Px015638.2 | -2.7012 | 2.86E-04  | 8.73E-04  | Transposon Ty3-I Gag-Pol polyprotein; similar with YI31B_YEAST       |
| Px002356.2 | -2.5272 | 1.32E-04  | 4.25E-04  | Glutamate receptor, ionotropic kainate 2; similar with GRIK2_MOUSE   |
| Px003831.1 | -2.5272 | 1.32E-04  | 4.25E-04  | Transposon Ty3-G Gag-Pol polyprotein; similar with YG31B_YEAST       |
| Px011383.1 | -2.5148 | 7.29E-09  | 3.95E-08  | Glutamate receptor, ionotropic kainate 3; similar with GRIK3_HUMAN   |
| Px002244.1 | -2.4897 | 2.31E-23  | 2.93E-22  | Transposon Ty3-I Gag-Pol polyprotein; similar with YI31B_YEAST       |
| Px006189.1 | -2.4203 | 2.06E-22  | 2.53E-21  | 5-hydroxytryptamine receptor 1; similar with 5HT1R_DROME             |
| Px008288.1 | -1.9967 | 3.27E-10  | 1.99E-09  | Glutamate [NMDA] receptor subunit 3A; similar with NMD3A_HUMAN       |
| Px011097.1 | -1.8357 | 1.53E-15  | 1.35E-14  | Serine proteinase stubble; similar with STUB_DROME                   |
| Px000929.1 | -1.6126 | 1.03E-08  | 5.48E-08  | Octopamine receptor beta-2R; similar with OCTB2_DROME                |
| Px011491.5 | -1.5234 | 4.16E-14  | 3.35E-13  | Rhodopsin, GQ-coupled; similar with OPSD1_MIZYE                      |
| Px005341.1 | -1.4819 | 1.93E-101 | 7.46E-100 | Collagenase; similar with COGS_HYPLI                                 |
| Px004913.1 | -1.3923 | 3.26E-212 | 2.11E-210 | Putative uncharacterized protein; similar with D6W9I4_TRICA          |
| Px003827.2 | -1.3590 | 4.00E-12  | 2.81E-11  | Cell surface glycoprotein 1; similar with SLAP1_CLOTH                |
| Px001307.1 | -1.3337 | 2.77E-04  | 8.50E-04  | Dehydrogenase/reductase SDR family member 1                          |
| Px010138.1 | -1.3242 | 6.26E-12  | 4.33E-11  | Probable G-protein coupled receptor B0563.6; similar with YT66_CAEEL |
| Px010923.3 | -1.3232 | 1.15E-05  | 4.41E-05  | Putative uncharacterized protein; similar with Q17GL6_AEDAE          |
| Px002306.1 | -1.2862 | 1.81E-09  | 1.03E-08  | Calcitonin receptor; similar with CALCR_RABIT                        |
| Px009076.2 | -1.1289 | 1.13E-10  | 7.15E-10  | Exportin-7; similar with XPO7_CHICK                                  |
| Px004308.1 | -1.1024 | 4.07E-05  | 1.43E-04  | Uncharacterized protein K02A2.6; similar with YRD6_CAEEL             |
| Px016265.1 | -1.0491 | 1.67E-04  | 5.31E-04  | Glutamate receptor, ionotropic kainate 3; similar with GRIK3_MACFA   |
| Px015204.1 | -1.0183 | 0.00E+00  | 0.00E+00  | Transposon Ty3-I Gag-Pol polyprotein; similar with YI31B_YEAST       |
| Px001239.1 | -1.0036 | 9.68E-09  | 5.19E-08  | Serine protease P162; similar with D2A5Y8_TRICA                      |

**Table C.** A list of DEGs enriched in the *P. xylostella* pathways at 36 hpt<sub>I</sub> versus 36 hpt<sub>C</sub>.

| Gene ID                                 | log <sub>2</sub> R | P-value   | FDR       | Annotation                                                   |
|-----------------------------------------|--------------------|-----------|-----------|--------------------------------------------------------------|
| <b>Involved in Pancreatic secretion</b> |                    |           |           |                                                              |
| Px000644.1                              | 12.4260            | 4.78E-37  | 4.70E-36  | Pancreatic triacylglycerol lipase; similar with LIPP_MOUSE   |
| Px012560.1                              | 10.5968            | 1.26E-07  | 4.83E-07  | Lipase member H-B; similar with LIPHB_XENLA                  |
| Px007620.1                              | 10.3950            | 8.15E-10  | 3.63E-09  | Trypsin CFT-1; similar with TRYP_CHOFU                       |
| Px002495.1                              | 10.1815            | 7.08E-09  | 2.96E-08  | Carbonic anhydrase 5A, mitochondrial; similar with CAH5A_RAT |
| Px006069.1                              | 10.0136            | 2.26E-06  | 7.79E-06  | Trypsin CFT-1; similar with TRYP_CHOFU                       |
| Px013802.1                              | 8.5527             | 1.46E-08  | 5.93E-08  | Sodium/potassium-transporting ATPase subunit alpha-2         |
| Px008830.1                              | 6.6433             | 1.43E-111 | 2.90E-110 | Trypsin, alkaline C; similar with TRYC_MANSE                 |
| Px001804.1                              | 6.5119             | 2.83E-51  | 3.39E-50  | Trypsin, alkaline B; similar with TRYB_MANSE                 |
| Px007670.1                              | 6.2472             | 5.75E-63  | 7.92E-62  | Proclotting enzyme; similar with PCE_TACTR                   |
| Px007357.2                              | 5.3379             | 0.00E+00  | 0.00E+00  | Serine proteinase stubble; similar with STUB_DROME           |
| Px010971.1                              | 5.2472             | 1.05E-10  | 4.92E-10  | Trypsin CFT-1; similar with TRYP_CHOFU                       |
| Px005240.1                              | 5.1310             | 8.24E-124 | 1.79E-122 | Trypsin, alkaline A; similar with TRYA_MANSE                 |
| Px014882.1                              | 4.8506             | 4.25E-162 | 1.13E-160 | Trypsin, alkaline C; similar with TRYC_MANSE                 |
| Px005554.1                              | 4.6008             | 8.20E-07  | 2.93E-06  | Chymotrypsin-1; similar with CTR1_ANOGA                      |
| Px016055.1                              | 4.5497             | 4.52E-56  | 5.70E-55  | Trypsin, alkaline C; similar with TRYC_MANSE                 |
| Px002864.1                              | 4.5298             | 1.55E-103 | 3.01E-102 | Trypsin, alkaline B; similar with TRYB_MANSE                 |
| Px000995.2                              | 4.3915             | 0.00E+00  | 0.00E+00  | Carboxypeptidase A4; similar with CBPA4_HUMAN                |
| Px005241.1                              | 4.3794             | 1.43E-53  | 1.74E-52  | Trypsin CFT-1; similar with TRYP_CHOFU                       |
| Px007598.1                              | 4.3759             | 1.54E-119 | 3.27E-118 | Chymotrypsin-1; similar with CTR1_ANOGA                      |
| Px016053.1                              | 4.2124             | 5.01E-59  | 6.53E-58  | Trypsin; similar with TRYP_PHACE                             |
| Px011791.1                              | 4.1145             | 0.00E+00  | 0.00E+00  | Lipase member H; similar with LIPH_XENTR                     |
| Px009637.1                              | 4.1028             | 1.35E-27  | 1.13E-26  | Trypsin CFT-1; similar with TRYP_CHOFU                       |
| Px012011.2                              | 4.0620             | 0.00E+00  | 0.00E+00  | Pancreatic triacylglycerol lipase; similar with LIPP_MYOCO   |
| Px002586.1                              | 4.0373             | 5.30E-58  | 6.84E-57  | Trypsin CFT-1; similar with TRYP_CHOFU                       |
| Px013377.1                              | 4.0330             | 2.06E-219 | 6.86E-218 | Trypsin; similar with TRYP_PHACE                             |
| Px015276.1                              | 4.0315             | 9.55E-65  | 1.33E-63  | Trypsin CFT-1; similar with TRYP_CHOFU                       |
| Px005243.1                              | 3.9876             | 0.00E+00  | 0.00E+00  | Trypsin, alkaline A; similar with TRYA_MANSE                 |
| Px015277.1                              | 3.9698             | 7.98E-158 | 2.09E-156 | Trypsin CFT-1; similar with TRYP_CHOFU                       |
| Px004815.1                              | 3.9017             | 3.38E-20  | 2.32E-19  | Gut esterase 1; similar with EST1_CAEEL                      |
| Px007180.1                              | 3.8846             | 2.52E-32  | 2.29E-31  | Juvenile hormone esterase; similar with ESTJ_HELVI           |
| Px010313.2                              | 3.7896             | 2.43E-106 | 4.78E-105 | Serine proteinase stubble; similar with STUB_DROME           |
| Px006571.1                              | 3.7885             | 0.00E+00  | 0.00E+00  | Trypsin, alkaline B; similar with TRYB_MANSE                 |
| Px012813.1                              | 3.6622             | 2.98E-06  | 1.02E-05  | Serine proteinase stubble; similar with STUB_DROME           |
| Px005239.1                              | 3.6181             | 0.00E+00  | 0.00E+00  | Trypsin, alkaline A; similar with TRYA_MANSE                 |
| Px014201.1                              | 3.6008             | 7.33E-11  | 3.48E-10  | Sodium/potassium-transporting ATPase subunit alpha-2         |
| Px000992.1                              | 3.6006             | 0.00E+00  | 0.00E+00  | Carboxypeptidase A1; similar with CBPA1_BOVIN                |
| Px007617.1                              | 3.5958             | 0.00E+00  | 0.00E+00  | Trypsin CFT-1; similar with TRYP_CHOFU                       |
| Px006572.1                              | 3.4867             | 0.00E+00  | 0.00E+00  | Trypsin; similar with TRYP_PHACE                             |
| Px005765.1                              | 3.4325             | 1.33E-62  | 1.82E-61  | Vitellin-degrading protease; similar with VDP_BOMMO          |
| Px016056.1                              | 3.4297             | 0.00E+00  | 0.00E+00  | Trypsin, alkaline A; similar with TRYA_MANSE                 |
| Px009940.2                              | 3.4221             | 6.33E-52  | 7.64E-51  | Acetylcholinesterase; similar with ACES_CULPI                |
| Px008538.1                              | 3.4202             | 3.15E-138 | 7.39E-137 | Trypsin, alkaline B; similar with TRYB_MANSE                 |
| Px012048.1                              | 3.3901             | 4.29E-64  | 5.96E-63  | Chymotrypsin BI; similar with CTRB1_LITVA                    |
| Px007621.1                              | 3.3847             | 6.61E-21  | 4.65E-20  | Trypsin CFT-1; similar with TRYP_CHOFU                       |
| Px014592.1                              | 3.3707             | 9.04E-90  | 1.58E-88  | Trypsin CFT-1; similar with TRYP_CHOFU                       |
| Px005238.1                              | 3.3700             | 4.57E-59  | 5.96E-58  | Trypsin, alkaline B; similar with TRYB_MANSE                 |
| Px009046.1                              | 3.3378             | 8.69E-24  | 6.54E-23  | Carbonic anhydrase 7; similar with CAH7_MOUSE                |
| Px009569.1                              | 3.3179             | 0.00E+00  | 0.00E+00  | Trypsin CFT-1; similar with TRYP_CHOFU                       |
| Px007901.1                              | 3.2912             | 0.00E+00  | 0.00E+00  | Chymotrypsin BI; similar with CTRB1_LITVA                    |
| Px001998.2                              | 3.2879             | 2.48E-118 | 5.21E-117 | Carboxypeptidase B; similar with CBPB_ASTFL                  |

|            |        |           |           |                                                               |
|------------|--------|-----------|-----------|---------------------------------------------------------------|
| Px000993.1 | 3.2755 | 0.00E+00  | 0.00E+00  | Carboxypeptidase A2; similar with CBPA2_RAT                   |
| Px000991.6 | 3.2679 | 0.00E+00  | 0.00E+00  | Carboxypeptidase O; similar with CBPO_BOVIN                   |
| Px007599.1 | 3.2567 | 0.00E+00  | 0.00E+00  | Chymotrypsin-1; similar with CTR1_ANOGA                       |
| Px006767.1 | 3.2472 | 1.38E-04  | 3.92E-04  | Chymotrypsin-1; similar with E2BNV4_9HYME                     |
| Px015279.1 | 3.2472 | 1.79E-18  | 1.17E-17  | Trypsin, alkaline A; similar with TRYA_MANSE                  |
| Px004168.1 | 3.2472 | 2.59E-13  | 1.38E-12  | Plasma kallikrein; similar with KLKB1_HUMAN                   |
| Px012568.1 | 3.2398 | 0.00E+00  | 0.00E+00  | Trypsin CFT-1; similar with TRYP_CHOFU                        |
| Px007900.1 | 3.2235 | 0.00E+00  | 0.00E+00  | Chymotrypsin BI; similar with CTRB1_LITVA                     |
| Px015278.1 | 3.1962 | 2.10E-27  | 1.75E-26  | Trypsin, alkaline A; similar with TRYA_MANSE                  |
| Px003352.1 | 3.1927 | 1.50E-30  | 1.32E-29  | Venom carboxylesterase-6; similar with EST6_APIME             |
| Px010386.1 | 3.1714 | 0.00E+00  | 0.00E+00  | Trypsin CFT-1; similar with TRYP_CHOFU                        |
| Px016054.1 | 3.1536 | 3.24E-37  | 3.20E-36  | Trypsin; similar with TRYP_PHACE                              |
| Px007619.2 | 3.0951 | 0.00E+00  | 0.00E+00  | Trypsin, alkaline A; similar with TRYA_MANSE                  |
| Px002861.1 | 3.0431 | 0.00E+00  | 0.00E+00  | Trypsin, alkaline C; similar with TRYC_MANSE                  |
| Px009639.1 | 3.0376 | 0.00E+00  | 0.00E+00  | Trypsin CFT-1; similar with TRYP_CHOFU                        |
| Px001997.1 | 3.0350 | 2.53E-37  | 2.50E-36  | Carboxypeptidase B; similar with CBPB_ASTFL                   |
| Px007903.1 | 2.9954 | 0.00E+00  | 0.00E+00  | Collagenase; similar with COGS_HYPLI                          |
| Px005244.1 | 2.9796 | 7.91E-29  | 6.74E-28  | Trypsin CFT-1; similar with TRYP_CHOFU                        |
| Px004847.1 | 2.9467 | 8.27E-18  | 5.24E-17  | Putative carbonic anhydrase 5; similar with CAH5_CAEEL        |
| Px011683.2 | 2.9306 | 0.00E+00  | 0.00E+00  | Venom carboxylesterase-6; similar with EST6_APIME             |
| Px015280.1 | 2.9138 | 7.05E-10  | 3.15E-09  | Trypsin CFT-1; similar with TRYP_CHOFU                        |
| Px006570.1 | 2.8972 | 0.00E+00  | 0.00E+00  | Trypsin, alkaline B; similar with TRYB_MANSE                  |
| Px000996.2 | 2.8881 | 3.06E-71  | 4.53E-70  | Carboxypeptidase A2; similar with CBPA2_MOUSE                 |
| Px008089.1 | 2.8762 | 0.00E+00  | 0.00E+00  | Pancreatic lipase-related protein 2; similar with LIPR2_CAVPO |
| Px006190.1 | 2.8647 | 0.00E+00  | 0.00E+00  | Lipase member H-A; similar with LIPHA_XENLA                   |
| Px000994.1 | 2.8631 | 0.00E+00  | 0.00E+00  | Zinc carboxypeptidase A 1; similar with CBPA1_DROPS           |
| Px016057.1 | 2.8626 | 2.00E-77  | 3.18E-76  | Trypsin, alkaline B; similar with TRYB_MANSE                  |
| Px009638.1 | 2.8523 | 0.00E+00  | 0.00E+00  | Trypsin, alkaline B; similar with TRYB_MANSE                  |
| Px011788.2 | 2.8400 | 3.24E-222 | 1.09E-220 | Pancreatic lipase-related protein 2; similar with LIPR2_BOVIN |
| Px002587.1 | 2.7903 | 0.00E+00  | 0.00E+00  | Trypsin CFT-1; similar with TRYP_CHOFU                        |
| Px005373.1 | 2.7565 | 1.52E-39  | 1.56E-38  | Carboxypeptidase B; similar with CBPB_ASTFL                   |
| Px017996.1 | 2.7512 | 1.00E-177 | 2.87E-176 | Acetylcholinesterase; similar with ACES_HUMAN                 |
| Px000107.1 | 2.7335 | 0.00E+00  | 0.00E+00  | Trypsin, alkaline C; similar with TRYC_MANSE                  |
| Px007618.1 | 2.7222 | 1.13E-272 | 4.41E-271 | Trypsin CFT-1; similar with TRYP_CHOFU                        |
| Px011887.1 | 2.7196 | 0.00E+00  | 0.00E+00  | Trypsin, alkaline C; similar with TRYC_MANSE                  |
| Px009286.1 | 2.7141 | 0.00E+00  | 0.00E+00  | Trypsin, alkaline C; similar with TRYC_MANSE                  |
| Px005936.2 | 2.7085 | 3.12E-86  | 5.29E-85  | Trypsin, alkaline C; similar with TRYC_MANSE                  |
| Px000089.1 | 2.6887 | 2.89E-87  | 4.95E-86  | Acetylcholinesterase; similar with ACES_FELCA                 |
| Px002442.1 | 2.6772 | 1.51E-16  | 9.17E-16  | Trypsin, alkaline C; similar with TRYC_MANSE                  |
| Px002865.1 | 2.6726 | 0.00E+00  | 0.00E+00  | Trypsin 5G1; similar with TRY5_AEDAE                          |
| Px007902.1 | 2.6449 | 5.66E-27  | 4.65E-26  | Collagenase; similar with COGS_HYPLI                          |
| Px002441.1 | 2.6127 | 4.36E-75  | 6.75E-74  | Trypsin, alkaline B; similar with TRYB_MANSE                  |
| Px018074.1 | 2.6056 | 3.91E-24  | 2.97E-23  | Chymotrypsin-like elastase family member 2A                   |
| Px002735.1 | 2.6010 | 1.66E-257 | 6.15E-256 | Esterase FE4; similar with ESTF_MYZPE                         |
| Px000395.1 | 2.6001 | 0.00E+00  | 0.00E+00  | Alpha-amylase 4N; similar with AM4N_DROAN                     |
| Px005193.2 | 2.5958 | 2.33E-141 | 5.61E-140 | Pancreatic lipase-related protein 2; similar with LIPR2_MYOCO |
| Px011889.1 | 2.5691 | 1.52E-21  | 1.09E-20  | Achelase-1; similar with ACH1_LONAC                           |
| Px007600.1 | 2.5619 | 1.13E-226 | 3.92E-225 | Chymotrypsin-1; similar with CTR1_ANOGA                       |
| Px007674.2 | 2.5239 | 0.00E+00  | 0.00E+00  | Collagenase; similar with COGS_HYPLI                          |
| Px007675.1 | 2.5233 | 0.00E+00  | 0.00E+00  | Collagenase; similar with COGS_HYPLI                          |
| Px006345.1 | 2.5102 | 0.00E+00  | 0.00E+00  | Pancreatic lipase-related protein 2; similar with LIPR2_MYOCO |
| Px002860.1 | 2.5102 | 4.25E-17  | 2.64E-16  | Achelase-1; similar with ACH1_LONAC                           |
| Px011049.1 | 2.5090 | 4.88E-35  | 4.62E-34  | Acetylcholinesterase; similar with ACES_FELCA                 |
| Px004750.1 | 2.4896 | 0.00E+00  | 0.00E+00  | Pancreatic lipase-related protein 2; similar with LIPR2_RAT   |

|            |        |           |           |                                                               |
|------------|--------|-----------|-----------|---------------------------------------------------------------|
| Px002736.1 | 2.4868 | 0.00E+00  | 0.00E+00  | Venom carboxylesterase-6; similar with EST6_APIME             |
| Px007677.1 | 2.4787 | 0.00E+00  | 0.00E+00  | Trypsin-7; similar with TRY7_ANOGA                            |
| Px012582.1 | 2.4724 | 2.13E-127 | 4.68E-126 | Collagenase; similar with COGS_HYPLI                          |
| Px009488.1 | 2.4558 | 6.08E-05  | 1.81E-04  | Chymotrypsin-like serine proteinase; similar with CTRL_HALRU  |
| Px016058.1 | 2.4185 | 0.00E+00  | 0.00E+00  | Trypsin, alkaline C; similar with TRYC_MANSE                  |
| Px002588.1 | 2.4151 | 4.81E-14  | 2.66E-13  | Trypsin, alkaline C; similar with TRYC_MANSE                  |
| Px010489.1 | 2.4085 | 6.89E-66  | 9.73E-65  | Trypsin, alkaline C; similar with TRYC_MANSE                  |
| Px006430.1 | 2.4038 | 1.48E-302 | 6.22E-301 | Esterase FE4; similar with ESTF_MYZPE                         |
| Px009287.1 | 2.4027 | 1.27E-279 | 5.09E-278 | Trypsin CFT-1; similar with TRYP_CHOFU                        |
| Px009395.1 | 2.3871 | 1.03E-17  | 6.47E-17  | Proclotting enzyme; similar with PCE_TACTR                    |
| Px007616.1 | 2.3746 | 1.09E-158 | 2.87E-157 | Trypsin CFT-1; similar with TRYP_CHOFU                        |
| Px005242.1 | 2.3668 | 2.59E-19  | 1.73E-18  | Trypsin CFT-1; similar with TRYP_CHOFU                        |
| Px004752.1 | 2.3527 | 0.00E+00  | 0.00E+00  | Pancreatic lipase-related protein 2; similar with LIPR2_BOVIN |
| Px002589.1 | 2.3435 | 3.45E-96  | 6.29E-95  | Trypsin, alkaline A; similar with TRYA_MANSE                  |
| Px004753.1 | 2.3410 | 9.82E-208 | 3.12E-206 | Pancreatic lipase-related protein 2; similar with LIPR2_MYOCO |
| Px015275.1 | 2.3286 | 0.00E+00  | 0.00E+00  | Trypsin CFT-1; similar with TRYP_CHOFU                        |
| Px006441.1 | 2.3113 | 0.00E+00  | 0.00E+00  | Lipase member H; similar with LIPH_RAT                        |
| Px007601.1 | 2.2954 | 3.63E-31  | 3.23E-30  | Chymotrypsin-1; similar with CTR1_ANOGA                       |
| Px012592.1 | 2.2775 | 0.00E+00  | 0.00E+00  | Juvenile hormone esterase; similar with ESTJ_HELVI            |
| Px017515.1 | 2.2558 | 2.50E-108 | 4.98E-107 | Trypsin, alkaline C; similar with TRYC_MANSE                  |
| Px009567.1 | 2.2552 | 3.00E-104 | 5.83E-103 | Trypsin, alkaline B; similar with TRYB_MANSE                  |
| Px001990.2 | 2.2289 | 2.92E-104 | 5.69E-103 | Carboxypeptidase B; similar with CBPB_ASTFL                   |
| Px009566.1 | 2.2251 | 1.29E-259 | 4.84E-258 | Trypsin, alkaline C; similar with TRYC_MANSE                  |
| Px000771.1 | 2.1857 | 1.04E-117 | 2.18E-116 | Trypsin CFT-1; similar with TRYP_CHOFU                        |
| Px011886.1 | 2.1750 | 1.89E-125 | 4.14E-124 | Trypsin CFT-1; similar with TRYP_CHOFU                        |
| Px001239.1 | 2.1600 | 2.79E-38  | 2.80E-37  | Serine protease P162; similar with D2A5Y8_TRICA               |
| Px002296.1 | 2.1474 | 1.41E-169 | 3.92E-168 | Pancreatic triacylglycerol lipase; similar with LIPP_HUMAN    |
| Px003649.1 | 2.1363 | 0.00E+00  | 0.00E+00  | Esterase FE4; similar with ESTF_MYZPE                         |
| Px003776.1 | 2.1246 | 9.72E-09  | 4.02E-08  | TBC1 domain family member 30; similar with TBC30_XENTR        |
| Px003273.1 | 2.1129 | 6.40E-16  | 3.82E-15  | Pancreatic lipase-related protein 2; similar with LIPR2_CAVPO |
| Px000744.1 | 2.0773 | 1.67E-04  | 4.72E-04  | Lipase member H-A; similar with LIPHA_XENLA                   |
| Px001833.1 | 2.0603 | 0.00E+00  | 0.00E+00  | Serine protease easter; similar with EAST_DROME               |
| Px004167.1 | 2.0469 | 1.15E-06  | 4.06E-06  | Plasma kallikrein; similar with KLKB1_MOUSE                   |
| Px012569.1 | 2.0285 | 0.00E+00  | 0.00E+00  | Trypsin, alkaline C; similar with TRYC_MANSE                  |
| Px002440.1 | 2.0145 | 2.30E-21  | 1.64E-20  | Trypsin, alkaline B; similar with TRYB_MANSE                  |
| Px000515.1 | 1.9774 | 1.03E-98  | 1.91E-97  | Esterase FE4; similar with ESTF_MYZPE                         |
| Px012570.1 | 1.9654 | 0.00E+00  | 0.00E+00  | Trypsin CFT-1; similar with TRYP_CHOFU                        |
| Px009775.1 | 1.9517 | 8.35E-05  | 2.44E-04  | Two pore calcium channel protein 1; similar with TPC1_RAT     |
| Px011097.1 | 1.9460 | 2.65E-10  | 1.22E-09  | Serine proteinase stubble; similar with STUB_DROME            |
| Px004751.1 | 1.9293 | 0.00E+00  | 0.00E+00  | Pancreatic triacylglycerol lipase; similar with LIPP_HUMAN    |
| Px002512.1 | 1.9231 | 4.29E-29  | 3.68E-28  | Brachyurin; similar with COGS_UCAPU                           |
| Px010975.1 | 1.8944 | 5.90E-09  | 2.48E-08  | Trypsin, alkaline C; similar with TRYC_MANSE                  |
| Px000394.1 | 1.8666 | 1.72E-210 | 5.53E-209 | Alpha-amylase 4N; similar with AM4N_DROAN                     |
| Px002866.1 | 1.8658 | 5.28E-09  | 2.23E-08  | Trypsin, alkaline A; similar with TRYA_MANSE                  |
| Px008406.1 | 1.8639 | 2.77E-08  | 1.10E-07  | Serine proteinase stubble; similar with STUB_DROME            |
| Px006640.1 | 1.8615 | 2.23E-04  | 6.15E-04  | Putative carbonic anhydrase 5; similar with CAH5_CAEEEL       |
| Px013665.3 | 1.8475 | 2.46E-37  | 2.43E-36  | Collagenase; similar with COGS_HYPLI                          |
| Px012329.1 | 1.7693 | 5.39E-84  | 8.95E-83  | Serine protease persephone; similar with PSH_DROME            |
| Px002295.1 | 1.7684 | 0.00E+00  | 0.00E+00  | Pancreatic lipase-related protein 2; similar with LIPR2_BOVIN |
| Px011231.1 | 1.7453 | 1.76E-27  | 1.46E-26  | Protein unc-50 homolog; similar with UNC50_DROME              |
| Px010017.1 | 1.7418 | 0.00E+00  | 0.00E+00  | Carboxypeptidase B; similar with CBPB_ASTFL                   |
| Px011755.1 | 1.7284 | 1.92E-39  | 1.96E-38  | Antennal esterase CXE4; similar with D3GDL5_SPOLI             |
| Px004235.2 | 1.7053 | 1.90E-19  | 1.28E-18  | Putative uncharacterized protein; similar with Q178N6_AEDAE   |
| Px000402.2 | 1.6821 | 5.77E-83  | 9.50E-82  | Serine protease persephone; similar with PSH_DROME            |

|            |         |           |           |                                                                |
|------------|---------|-----------|-----------|----------------------------------------------------------------|
| Px009088.1 | 1.6795  | 5.48E-174 | 1.55E-172 | Mastin; similar with TRYM_CANFA                                |
| Px003712.1 | 1.6490  | 1.05E-19  | 7.17E-19  | Acetylcholinesterase; similar with ACES_CULPI                  |
| Px005342.1 | 1.6408  | 3.80E-156 | 9.82E-155 | Collagenase; similar with COGS_HYPLI                           |
| Px003251.1 | 1.6237  | 1.02E-19  | 6.98E-19  | Putative cuticle protein; similar with C0H6E8_BOMMO            |
| Px017997.1 | 1.6216  | 3.59E-04  | 9.62E-04  | Esterase FE4; similar with ESTF_MYZPE                          |
| Px007904.1 | 1.6124  | 0.00E+00  | 0.00E+00  | Collagenase; similar with COGS_HYPLI                           |
| Px001556.1 | 1.6061  | 8.94E-117 | 1.85E-115 | Serine protease easter; similar with EAST_DROME                |
| Px013162.1 | 1.5740  | 7.41E-151 | 1.88E-149 | Serine protease snake; similar with SNAK_DROME                 |
| Px005340.1 | 1.5499  | 1.24E-139 | 2.94E-138 | Collagenase; similar with COGS_HYPLI                           |
| Px004846.1 | 1.5437  | 4.25E-52  | 5.15E-51  | Putative carbonic anhydrase 5; similar with CAH5_CAEEL         |
| Px007772.1 | 1.5076  | 2.80E-66  | 3.96E-65  | Esterase B1; similar with EST1_CULPI                           |
| Px014702.1 | 1.5035  | 1.75E-04  | 4.92E-04  | Lysine-specific demethylase 8; similar with KDM8_RAT           |
| Px014831.2 | 1.4467  | 0.00E+00  | 0.00E+00  | Serine proteinase stubble; similar with STUB_DROME             |
| Px012191.1 | 1.4028  | 2.38E-208 | 7.61E-207 | Sodium/potassium-transporting ATPase subunit alpha-1           |
| Px009568.1 | 1.3992  | 1.23E-04  | 3.53E-04  | Trypsin, alkaline C; similar with TRYC_MANSE                   |
| Px005341.1 | 1.3783  | 1.92E-45  | 2.13E-44  | Collagenase; similar with COGS_HYPLI                           |
| Px005947.1 | 1.3627  | 2.45E-06  | 8.39E-06  | Serine proteinase stubble; similar with STUB_DROME             |
| Px000146.1 | 1.3503  | 5.61E-05  | 1.68E-04  | Adenylate cyclase type 9; similar with ADCY9_HUMAN             |
| Px007906.2 | 1.3236  | 0.00E+00  | 0.00E+00  | Collagenase; similar with COGS_HYPLI                           |
| Px012207.1 | 1.2928  | 3.22E-34  | 3.02E-33  | Transmembrane protein 205; similar with TM205_MOUSE            |
| Px011499.2 | 1.1964  | 1.89E-18  | 1.23E-17  | Serine protease persephone; similar with PSH_DROME             |
| Px011153.3 | 1.1683  | 1.07E-26  | 8.76E-26  | Complement factor I; similar with CFAI_RAT                     |
| Px011888.1 | 1.1647  | 3.48E-08  | 1.38E-07  | Chymotrypsin-like elastase family member 2B                    |
| Px014830.1 | 1.1646  | 9.91E-167 | 2.71E-165 | Tryptase; similar with TRYB1_MOUSE                             |
| Px003670.2 | 1.1636  | 0.00E+00  | 0.00E+00  | Serine protease easter; similar with EAST_DROME                |
| Px004131.5 | 1.1474  | 6.20E-26  | 4.92E-25  | Calcium-independent phospholipase A2-gamma                     |
| Px010855.1 | 1.1350  | 3.54E-11  | 1.72E-10  | Trypsin, alkaline A; similar with TRYA_MANSE                   |
| Px012098.2 | 1.0475  | 2.15E-05  | 6.71E-05  | Lipase member I; similar with LIPI_HUMAN                       |
| Px011757.1 | 1.0401  | 5.69E-11  | 2.72E-10  | Esterase FE4; similar with ESTF_MYZPE                          |
| Px016983.3 | 1.0379  | 6.64E-09  | 2.78E-08  | Serine proteinase stubble; similar with STUB_DROME             |
| Px003126.1 | -3.3822 | 3.42E-05  | 1.05E-04  | Adenylate cyclase type 3; similar with ADCY3_MOUSE             |
| Px014636.1 | -1.5417 | 2.28E-04  | 6.26E-04  | Trypsin-1; similar with TRY1_ANOGA                             |
| Px016332.1 | -1.5166 | 0.00E+00  | 0.00E+00  | Calcium-transporting ATPase sarcoplasmic/endoplasmic reticulum |
| Px000220.2 | -1.1220 | 7.78E-07  | 2.79E-06  | Bumetanide-sensitive sodium-(potassium)-chloride cotransporter |
| Px012289.1 | -1.0288 | 3.16E-06  | 1.07E-05  | Liver carboxylesterase; similar with EST1_MESAU                |

### **Involved in protein digestion and absorption**

|            |         |           |           |                                                      |
|------------|---------|-----------|-----------|------------------------------------------------------|
| Px007620.1 | 10.3950 | 8.15E-10  | 3.63E-09  | Trypsin CFT-1; similar with TRYP_CHOFU               |
| Px006069.1 | 10.0136 | 2.26E-06  | 7.79E-06  | Trypsin CFT-1; similar with TRYP_CHOFU               |
| Px013802.1 | 8.5527  | 1.46E-08  | 5.93E-08  | Sodium/potassium-transporting ATPase subunit alpha-2 |
| Px008830.1 | 6.6433  | 1.43E-111 | 2.90E-110 | Trypsin, alkaline C; similar with TRYC_MANSE         |
| Px001804.1 | 6.5119  | 2.83E-51  | 3.39E-50  | Trypsin, alkaline B; similar with TRYB_MANSE         |
| Px007670.1 | 6.2472  | 5.75E-63  | 7.92E-62  | Proclotting enzyme; similar with PCE_TACTR           |
| Px007357.2 | 5.3379  | 0.00E+00  | 0.00E+00  | Serine proteinase stubble; similar with STUB_DROME   |
| Px010971.1 | 5.2472  | 1.05E-10  | 4.92E-10  | Trypsin CFT-1; similar with TRYP_CHOFU               |
| Px005240.1 | 5.1310  | 8.24E-124 | 1.79E-122 | Trypsin, alkaline A; similar with TRYA_MANSE         |
| Px014256.1 | 4.9352  | 1.34E-08  | 5.46E-08  | Unknown functio                                      |
| Px014882.1 | 4.8506  | 4.25E-162 | 1.13E-160 | Trypsin, alkaline C; similar with TRYC_MANSE         |
| Px005554.1 | 4.6008  | 8.20E-07  | 2.93E-06  | Chymotrypsin-1; similar with CTR1_ANOGA              |
| Px016055.1 | 4.5497  | 4.52E-56  | 5.70E-55  | Trypsin, alkaline C; similar with TRYC_MANSE         |
| Px002864.1 | 4.5298  | 1.55E-103 | 3.01E-102 | Trypsin, alkaline B; similar with TRYB_MANSE         |
| Px000995.2 | 4.3915  | 0.00E+00  | 0.00E+00  | Carboxypeptidase A4; similar with CBPA4_HUMAN        |
| Px005241.1 | 4.3794  | 1.43E-53  | 1.74E-52  | Trypsin CFT-1; similar with TRYP_CHOFU               |
| Px007598.1 | 4.3759  | 1.54E-119 | 3.27E-118 | Chymotrypsin-1; similar with CTR1_ANOGA              |

|            |        |           |           |                                                                     |
|------------|--------|-----------|-----------|---------------------------------------------------------------------|
| Px016053.1 | 4.2124 | 5.01E-59  | 6.53E-58  | Trypsin; similar with TRYP_PHACE                                    |
| Px009637.1 | 4.1028 | 1.35E-27  | 1.13E-26  | Trypsin CFT-1; similar with TRYP_CHOFU                              |
| Px002586.1 | 4.0373 | 5.30E-58  | 6.84E-57  | Trypsin CFT-1; similar with TRYP_CHOFU                              |
| Px013377.1 | 4.0330 | 2.06E-219 | 6.86E-218 | Trypsin; similar with TRYP_PHACE                                    |
| Px015276.1 | 4.0315 | 9.55E-65  | 1.33E-63  | Trypsin CFT-1; similar with TRYP_CHOFU                              |
| Px005243.1 | 3.9876 | 0.00E+00  | 0.00E+00  | Trypsin, alkaline A; similar with TRYA_MANSE                        |
| Px015277.1 | 3.9698 | 7.98E-158 | 2.09E-156 | Trypsin CFT-1; similar with TRYP_CHOFU                              |
| Px010313.2 | 3.7896 | 2.43E-106 | 4.78E-105 | Serine proteinase stubble; similar with STUB_DROME                  |
| Px006571.1 | 3.7885 | 0.00E+00  | 0.00E+00  | Trypsin, alkaline B; similar with TRYB_MANSE                        |
| Px012813.1 | 3.6622 | 2.98E-06  | 1.02E-05  | Serine proteinase stubble; similar with STUB_DROME                  |
| Px001649.1 | 3.6353 | 5.51E-68  | 7.90E-67  | MAM domain-containing glycosylphosphatidylinositol anchor protein 1 |
| Px005239.1 | 3.6181 | 0.00E+00  | 0.00E+00  | Trypsin, alkaline A; similar with TRYA_MANSE                        |
| Px014201.1 | 3.6008 | 7.33E-11  | 3.48E-10  | Sodium/potassium-transporting ATPase subunit alpha-2                |
| Px000992.1 | 3.6006 | 0.00E+00  | 0.00E+00  | Carboxypeptidase A1; similar with CBPA1_BOVIN                       |
| Px007617.1 | 3.5958 | 0.00E+00  | 0.00E+00  | Trypsin CFT-1; similar with TRYP_CHOFU                              |
| Px006572.1 | 3.4867 | 0.00E+00  | 0.00E+00  | Trypsin; similar with TRYP_PHACE                                    |
| Px005765.1 | 3.4325 | 1.33E-62  | 1.82E-61  | Vitellin-degrading protease; similar with VDP_BOMMO                 |
| Px016056.1 | 3.4297 | 0.00E+00  | 0.00E+00  | Trypsin, alkaline A; similar with TRYA_MANSE                        |
| Px008538.1 | 3.4202 | 3.15E-138 | 7.39E-137 | Trypsin, alkaline B; similar with TRYB_MANSE                        |
| Px011428.1 | 3.4151 | 1.82E-19  | 1.23E-18  | Peptide transporter family 1; similar with PEPT1_DROME              |
| Px012048.1 | 3.3901 | 4.29E-64  | 5.96E-63  | Chymotrypsin BI; similar with CTRB1_LITVA                           |
| Px007621.1 | 3.3847 | 6.61E-21  | 4.65E-20  | Trypsin CFT-1; similar with TRYP_CHOFU                              |
| Px014592.1 | 3.3707 | 9.04E-90  | 1.58E-88  | Trypsin CFT-1; similar with TRYP_CHOFU                              |
| Px005238.1 | 3.3700 | 4.57E-59  | 5.96E-58  | Trypsin, alkaline B; similar with TRYB_MANSE                        |
| Px009569.1 | 3.3179 | 0.00E+00  | 0.00E+00  | Trypsin CFT-1; similar with TRYP_CHOFU                              |
| Px007901.1 | 3.2912 | 0.00E+00  | 0.00E+00  | Chymotrypsin BI; similar with CTRB1_LITVA                           |
| Px001998.2 | 3.2879 | 2.48E-118 | 5.21E-117 | Carboxypeptidase B; similar with CBPB_ASTFL                         |
| Px013646.1 | 3.2808 | 1.40E-59  | 1.84E-58  | Proton-coupled amino acid transporter 4                             |
| Px000993.1 | 3.2755 | 0.00E+00  | 0.00E+00  | Carboxypeptidase A2; similar with CBPA2_RAT                         |
| Px000991.6 | 3.2679 | 0.00E+00  | 0.00E+00  | Carboxypeptidase O; similar with CBPO_BOVIN                         |
| Px007599.1 | 3.2567 | 0.00E+00  | 0.00E+00  | Chymotrypsin-1; similar with CTR1_ANOGA                             |
| Px006767.1 | 3.2472 | 1.38E-04  | 3.92E-04  | Chymotrypsin-1; similar with E2BNV4_9HYME                           |
| Px015279.1 | 3.2472 | 1.79E-18  | 1.17E-17  | Trypsin, alkaline A; similar with TRYA_MANSE                        |
| Px004168.1 | 3.2472 | 2.59E-13  | 1.38E-12  | Plasma kallikrein; similar with KLKB1_HUMAN                         |
| Px002648.1 | 3.2472 | 2.32E-06  | 7.97E-06  | Tachykinins; similar with TACHY_APIME                               |
| Px012568.1 | 3.2398 | 0.00E+00  | 0.00E+00  | Trypsin CFT-1; similar with TRYP_CHOFU                              |
| Px007900.1 | 3.2235 | 0.00E+00  | 0.00E+00  | Chymotrypsin BI; similar with CTRB1_LITVA                           |
| Px015278.1 | 3.1962 | 2.10E-27  | 1.75E-26  | Trypsin, alkaline A; similar with TRYA_MANSE                        |
| Px010386.1 | 3.1714 | 0.00E+00  | 0.00E+00  | Trypsin CFT-1; similar with TRYP_CHOFU                              |
| Px016054.1 | 3.1536 | 3.24E-37  | 3.20E-36  | Trypsin; similar with TRYP_PHACE                                    |
| Px007619.2 | 3.0951 | 0.00E+00  | 0.00E+00  | Trypsin, alkaline A; similar with TRYA_MANSE                        |
| Px002861.1 | 3.0431 | 0.00E+00  | 0.00E+00  | Trypsin, alkaline C; similar with TRYC_MANSE                        |
| Px009639.1 | 3.0376 | 0.00E+00  | 0.00E+00  | Trypsin CFT-1; similar with TRYP_CHOFU                              |
| Px001997.1 | 3.0350 | 2.53E-37  | 2.50E-36  | Carboxypeptidase B; similar with CBPB_ASTFL                         |
| Px007903.1 | 2.9954 | 0.00E+00  | 0.00E+00  | Collagenase; similar with COGS_HYPLI                                |
| Px014424.1 | 2.9841 | 1.63E-06  | 5.68E-06  | Proton-coupled amino acid transporter 4                             |
| Px005244.1 | 2.9796 | 7.91E-29  | 6.74E-28  | Trypsin CFT-1; similar with TRYP_CHOFU                              |
| Px015049.1 | 2.9693 | 5.52E-35  | 5.22E-34  | Venom dipeptidyl peptidase 4; similar with VDDP4_VESVU              |
| Px015280.1 | 2.9138 | 7.05E-10  | 3.15E-09  | Trypsin CFT-1; similar with TRYP_CHOFU                              |
| Px006570.1 | 2.8972 | 0.00E+00  | 0.00E+00  | Trypsin, alkaline B; similar with TRYB_MANSE                        |
| Px000996.2 | 2.8881 | 3.06E-71  | 4.53E-70  | Carboxypeptidase A2; similar with CBPA2_MOUSE                       |
| Px000994.1 | 2.8631 | 0.00E+00  | 0.00E+00  | Zinc carboxypeptidase A 1; similar with CBPA1_DRUPS                 |
| Px016057.1 | 2.8626 | 2.00E-77  | 3.18E-76  | Trypsin, alkaline B; similar with TRYB_MANSE                        |
| Px009638.1 | 2.8523 | 0.00E+00  | 0.00E+00  | Trypsin, alkaline B; similar with TRYB_MANSE                        |

|            |        |           |           |                                                              |
|------------|--------|-----------|-----------|--------------------------------------------------------------|
| Px002587.1 | 2.7903 | 0.00E+00  | 0.00E+00  | Trypsin CFT-1; similar with TRYP_CHOFU                       |
| Px002993.1 | 2.7717 | 0.00E+00  | 0.00E+00  | Zinc metalloproteinase nas-4; similar with NAS4_CAEEL        |
| Px005373.1 | 2.7565 | 1.52E-39  | 1.56E-38  | Carboxypeptidase B; similar with CBPB_ASTFL                  |
| Px000107.1 | 2.7335 | 0.00E+00  | 0.00E+00  | Trypsin, alkaline C; similar with TRYC_MANSE                 |
| Px007618.1 | 2.7222 | 1.13E-272 | 4.41E-271 | Trypsin CFT-1; similar with TRYP_CHOFU                       |
| Px011887.1 | 2.7196 | 0.00E+00  | 0.00E+00  | Trypsin, alkaline C; similar with TRYC_MANSE                 |
| Px009286.1 | 2.7141 | 0.00E+00  | 0.00E+00  | Trypsin, alkaline C; similar with TRYC_MANSE                 |
| Px005936.2 | 2.7085 | 3.12E-86  | 5.29E-85  | Trypsin, alkaline C; similar with TRYC_MANSE                 |
| Px002442.1 | 2.6772 | 1.51E-16  | 9.17E-16  | Trypsin, alkaline C; similar with TRYC_MANSE                 |
| Px002865.1 | 2.6726 | 0.00E+00  | 0.00E+00  | Trypsin 5G1; similar with TRY5_AEDAE                         |
| Px007902.1 | 2.6449 | 5.66E-27  | 4.65E-26  | Collagenase; similar with COGS_HYPLI                         |
| Px004330.1 | 2.6327 | 2.73E-97  | 5.00E-96  | Proton-coupled amino acid transporter 1                      |
| Px002441.1 | 2.6127 | 4.36E-75  | 6.75E-74  | Trypsin, alkaline B; similar with TRYB_MANSE                 |
| Px018074.1 | 2.6056 | 3.91E-24  | 2.97E-23  | Chymotrypsin-like elastase family member 2A                  |
| Px011889.1 | 2.5691 | 1.52E-21  | 1.09E-20  | Achelase-1; similar with ACH1_LONAC                          |
| Px007600.1 | 2.5619 | 1.13E-226 | 3.92E-225 | Chymotrypsin-1; similar with CTR1_ANOGA                      |
| Px007674.2 | 2.5239 | 0.00E+00  | 0.00E+00  | Collagenase; similar with COGS_HYPLI                         |
| Px007675.1 | 2.5233 | 0.00E+00  | 0.00E+00  | Collagenase; similar with COGS_HYPLI                         |
| Px002860.1 | 2.5102 | 4.25E-17  | 2.64E-16  | Achelase-1; similar with ACH1_LONAC                          |
| Px009766.1 | 2.4923 | 6.69E-06  | 2.20E-05  | Lysosomal Pro-X carboxypeptidase; similar with PCP_PONAB     |
| Px007677.1 | 2.4787 | 0.00E+00  | 0.00E+00  | Trypsin-7; similar with TRY7_ANOGA                           |
| Px012582.1 | 2.4724 | 2.13E-127 | 4.68E-126 | Collagenase; similar with COGS_HYPLI                         |
| Px009488.1 | 2.4558 | 6.08E-05  | 1.81E-04  | Chymotrypsin-like serine proteinase; similar with CTRL_HALRU |
| Px016058.1 | 2.4185 | 0.00E+00  | 0.00E+00  | Trypsin, alkaline C; similar with TRYC_MANSE                 |
| Px002588.1 | 2.4151 | 4.81E-14  | 2.66E-13  | Trypsin, alkaline C; similar with TRYC_MANSE                 |
| Px010489.1 | 2.4085 | 6.89E-66  | 9.73E-65  | Trypsin, alkaline C; similar with TRYC_MANSE                 |
| Px009287.1 | 2.4027 | 1.27E-279 | 5.09E-278 | Trypsin CFT-1; similar with TRYP_CHOFU                       |
| Px009395.1 | 2.3871 | 1.03E-17  | 6.47E-17  | Proclotting enzyme; similar with PCE_TACTR                   |
| Px013212.4 | 2.3763 | 4.42E-145 | 1.09E-143 | Inactive dipeptidyl peptidase 10; similar with DPP10_HUMAN   |
| Px007616.1 | 2.3746 | 1.09E-158 | 2.87E-157 | Trypsin CFT-1; similar with TRYP_CHOFU                       |
| Px005242.1 | 2.3668 | 2.59E-19  | 1.73E-18  | Trypsin CFT-1; similar with TRYP_CHOFU                       |
| Px002589.1 | 2.3435 | 3.45E-96  | 6.29E-95  | Trypsin, alkaline A; similar with TRYA_MANSE                 |
| Px015275.1 | 2.3286 | 0.00E+00  | 0.00E+00  | Trypsin CFT-1; similar with TRYP_CHOFU                       |
| Px007601.1 | 2.2954 | 3.63E-31  | 3.23E-30  | Chymotrypsin-1; similar with CTR1_ANOGA                      |
| Px017515.1 | 2.2558 | 2.50E-108 | 4.98E-107 | Trypsin, alkaline C; similar with TRYC_MANSE                 |
| Px009567.1 | 2.2552 | 3.00E-104 | 5.83E-103 | Trypsin, alkaline B; similar with TRYB_MANSE                 |
| Px001990.2 | 2.2289 | 2.92E-104 | 5.69E-103 | Carboxypeptidase B; similar with CBPB_ASTFL                  |
| Px009566.1 | 2.2251 | 1.29E-259 | 4.84E-258 | Trypsin, alkaline C; similar with TRYC_MANSE                 |
| Px000771.1 | 2.1857 | 1.04E-117 | 2.18E-116 | Trypsin CFT-1; similar with TRYP_CHOFU                       |
| Px001878.1 | 2.1781 | 2.23E-21  | 1.59E-20  | Lysosomal Pro-X carboxypeptidase; similar with PCP_PONAB     |
| Px011886.1 | 2.1750 | 1.89E-125 | 4.14E-124 | Trypsin CFT-1; similar with TRYP_CHOFU                       |
| Px001239.1 | 2.1600 | 2.79E-38  | 2.80E-37  | Serine protease P162; similar with D2A5Y8_TRICA              |
| Px001833.1 | 2.0603 | 0.00E+00  | 0.00E+00  | Serine protease easter; similar with EAST_DROME              |
| Px004167.1 | 2.0469 | 1.15E-06  | 4.06E-06  | Plasma kallikrein; similar with KLKB1_MOUSE                  |
| Px012569.1 | 2.0285 | 0.00E+00  | 0.00E+00  | Trypsin, alkaline C; similar with TRYC_MANSE                 |
| Px002440.1 | 2.0145 | 2.30E-21  | 1.64E-20  | Trypsin, alkaline B; similar with TRYB_MANSE                 |
| Px012570.1 | 1.9654 | 0.00E+00  | 0.00E+00  | Trypsin CFT-1; similar with TRYP_CHOFU                       |
| Px011097.1 | 1.9460 | 2.65E-10  | 1.22E-09  | Serine proteinase stubble; similar with STUB_DROME           |
| Px002512.1 | 1.9231 | 4.29E-29  | 3.68E-28  | Bradyurin; similar with COGS_UCAPU                           |
| Px010975.1 | 1.8944 | 5.90E-09  | 2.48E-08  | Trypsin, alkaline C; similar with TRYC_MANSE                 |
| Px002866.1 | 1.8658 | 5.28E-09  | 2.23E-08  | Trypsin, alkaline A; similar with TRYA_MANSE                 |
| Px008406.1 | 1.8639 | 2.77E-08  | 1.10E-07  | Serine proteinase stubble; similar with STUB_DROME           |
| Px013665.3 | 1.8475 | 2.46E-37  | 2.43E-36  | Collagenase; similar with COGS_HYPLI                         |
| Px012329.1 | 1.7693 | 5.39E-84  | 8.95E-83  | Serine protease persephone; similar with PSH_DROME           |



|            |         |           |           |                                                                   |
|------------|---------|-----------|-----------|-------------------------------------------------------------------|
| Px011231.1 | 1.7453  | 1.76E-27  | 1.46E-26  | Protein unc-50 homolog; similar with UNC50_DROME                  |
| Px010017.1 | 1.7418  | 0.00E+00  | 0.00E+00  | Carboxypeptidase B; similar with CBPB_ASTFL                       |
| Px000402.2 | 1.6821  | 5.77E-83  | 9.50E-82  | Serine protease persephone; similar with PSH_DROME                |
| Px009088.1 | 1.6795  | 5.48E-174 | 1.55E-172 | Mastin; similar with TRYM_CANFA                                   |
| Px005342.1 | 1.6408  | 3.80E-156 | 9.82E-155 | Collagenase; similar with COGS_HYPLI                              |
| Px007904.1 | 1.6124  | 0.00E+00  | 0.00E+00  | Collagenase; similar with COGS_HYPLI                              |
| Px001556.1 | 1.6061  | 8.94E-117 | 1.85E-115 | Serine protease easter; similar with EAST_DROME                   |
| Px013162.1 | 1.5740  | 7.41E-151 | 1.88E-149 | Serine protease snake; similar with SNAK_DROME                    |
| Px011754.1 | 1.5564  | 1.54E-08  | 6.25E-08  | Proton-coupled amino acid transporter 1                           |
| Px005340.1 | 1.5499  | 1.24E-139 | 2.94E-138 | Collagenase; similar with COGS_HYPLI                              |
| Px005328.1 | 1.5414  | 2.32E-48  | 2.68E-47  | Tubulin-specific chaperone cofactor E-like protein                |
| Px002809.2 | 1.5031  | 7.52E-18  | 4.78E-17  | WD repeat domain phosphoinositide-interacting protein 4           |
| Px012067.1 | 1.4726  | 4.54E-10  | 2.06E-09  | Proton-coupled amino acid transporter 4; similar with S36A4_XENLA |
| Px014831.2 | 1.4467  | 0.00E+00  | 0.00E+00  | Serine proteinase stubble; similar with STUB_DROME                |
| Px000703.2 | 1.4219  | 2.78E-12  | 1.41E-11  | Y+L amino acid transporter 2; similar with YLAT2_MOUSE            |
| Px010627.1 | 1.4167  | 1.53E-153 | 3.89E-152 | Wing disc-specific protein; similar with Q8WPH2_BOMMO             |
| Px007681.2 | 1.4129  | 6.79E-05  | 2.01E-04  | Monocarboxylate transporter 2; similar with MOT2_RAT              |
| Px012191.1 | 1.4028  | 2.38E-208 | 7.61E-207 | Sodium/potassium-transporting ATPase subunit alpha-1              |
| Px009568.1 | 1.3992  | 1.23E-04  | 3.53E-04  | Trypsin, alkaline C; similar with TRYC_MANSE                      |
| Px005341.1 | 1.3783  | 1.92E-45  | 2.13E-44  | Collagenase; similar with COGS_HYPLI                              |
| Px005947.1 | 1.3627  | 2.45E-06  | 8.39E-06  | Serine proteinase stubble; similar with STUB_DROME                |
| Px011737.1 | 1.3544  | 0.00E+00  | 0.00E+00  | Neurofilament heavy polypeptide; similar with NFH_MOUSE           |
| Px007906.2 | 1.3236  | 0.00E+00  | 0.00E+00  | Collagenase; similar with COGS_HYPLI                              |
| Px008882.1 | 1.2542  | 1.19E-128 | 2.65E-127 | Unknown functio                                                   |
| Px011499.2 | 1.1964  | 1.89E-18  | 1.23E-17  | Serine protease persephone; similar with PSH_DROME                |
| Px011153.3 | 1.1683  | 1.07E-26  | 8.76E-26  | Complement factor I; similar with CFAL_RAT                        |
| Px011888.1 | 1.1647  | 3.48E-08  | 1.38E-07  | Chymotrypsin-like elastase family member 2B                       |
| Px014830.1 | 1.1646  | 9.91E-167 | 2.71E-165 | Tryptase; similar with TRYB1_MOUSE                                |
| Px003670.2 | 1.1636  | 0.00E+00  | 0.00E+00  | Serine protease easter; similar with EAST_DROME                   |
| Px013919.1 | 1.1490  | 0.00E+00  | 0.00E+00  | Collagen alpha-4(VI) chain; similar with CO6A4_MOUSE              |
| Px010855.1 | 1.1350  | 3.54E-11  | 1.72E-10  | Trypsin, alkaline A; similar with TRYA_MANSE                      |
| Px002792.1 | 1.0827  | 4.51E-25  | 3.50E-24  | Unknown functio                                                   |
| Px008960.1 | 1.0459  | 7.21E-30  | 6.29E-29  | Peptide transporter family 1; similar with PEPT1_DROME            |
| Px016983.3 | 1.0379  | 6.64E-09  | 2.78E-08  | Serine proteinase stubble; similar with STUB_DROME                |
| Px005604.1 | 1.0184  | 4.78E-11  | 2.29E-10  | Monocarboxylate transporter 10; similar with MOT10_MOUSE          |
| Px011876.1 | -8.7166 | 3.46E-04  | 9.33E-04  | Armadillo repeat-containing protein 2; similar with ARMC2_HUMAN   |
| Px015142.1 | -1.8073 | 1.28E-05  | 4.08E-05  | Proton-coupled amino acid transporter 1; similar with S36A1_HUMAN |
| Px014636.1 | -1.5417 | 2.28E-04  | 6.26E-04  | Trypsin-1; similar with TRY1_ANOGA                                |
| Px005208.1 | -1.3118 | 2.13E-04  | 5.89E-04  | Inactive dipeptidyl peptidase 10; similar with DPP10_HUMAN        |
| Px012129.1 | -1.2949 | 1.78E-33  | 1.64E-32  | Lysosomal Pro-X carboxypeptidase; similar with PCP_PONAB          |
| Px009791.1 | -1.1980 | 0.00E+00  | 0.00E+00  | Cuticle collagen bli-1; similar with BLI1_CAEEL                   |

### Involved in Influenza A

|            |         |           |           |                                                                                |
|------------|---------|-----------|-----------|--------------------------------------------------------------------------------|
| Px008374.1 | 10.7904 | 2.99E-08  | 1.19E-07  | Phosphatidylinositol-4,5-bisphosphate 3-kinase catalytic subunit delta isoform |
| Px007620.1 | 10.3950 | 8.15E-10  | 3.63E-09  | Trypsin CFT-1; similar with TRYP_CHOFU                                         |
| Px006069.1 | 10.0136 | 2.26E-06  | 7.79E-06  | Trypsin CFT-1; similar with TRYP_CHOFU                                         |
| Px008830.1 | 6.6433  | 1.43E-111 | 2.90E-110 | Trypsin, alkaline C; similar with TRYC_MANSE                                   |
| Px001804.1 | 6.5119  | 2.83E-51  | 3.39E-50  | Trypsin, alkaline B; similar with TRYB_MANSE                                   |
| Px007670.1 | 6.2472  | 5.75E-63  | 7.92E-62  | Proclotting enzyme; similar with PCE_TACTR                                     |
| Px007357.2 | 5.3379  | 0.00E+00  | 0.00E+00  | Serine proteinase stubble; similar with STUB_DROME                             |
| Px010971.1 | 5.2472  | 1.05E-10  | 4.92E-10  | Trypsin CFT-1; similar with TRYP_CHOFU                                         |
| Px005240.1 | 5.1310  | 8.24E-124 | 1.79E-122 | Trypsin, alkaline A; similar with TRYA_MANSE                                   |
| Px014882.1 | 4.8506  | 4.25E-162 | 1.13E-160 | Trypsin, alkaline C; similar with TRYC_MANSE                                   |
| Px005554.1 | 4.6008  | 8.20E-07  | 2.93E-06  | Chymotrypsin-1; similar with CTR1_ANOGA                                        |

|            |        |           |           |                                                                |
|------------|--------|-----------|-----------|----------------------------------------------------------------|
| Px016055.1 | 4.5497 | 4.52E-56  | 5.70E-55  | Trypsin, alkaline C; similar with TRYC_MANSE                   |
| Px002864.1 | 4.5298 | 1.55E-103 | 3.01E-102 | Trypsin, alkaline B; similar with TRYB_MANSE                   |
| Px005241.1 | 4.3794 | 1.43E-53  | 1.74E-52  | Trypsin CFT-1; similar with TRYP_CHOFU                         |
| Px007598.1 | 4.3759 | 1.54E-119 | 3.27E-118 | Chymotrypsin-1; similar with CTR1_ANOGA                        |
| Px015514.1 | 4.2671 | 1.44E-18  | 9.38E-18  | Serine/threonine-protein kinase pelle; similar with KPEL_DROME |
| Px016053.1 | 4.2124 | 5.01E-59  | 6.53E-58  | Trypsin; similar with TRYP_PHACE                               |
| Px009637.1 | 4.1028 | 1.35E-27  | 1.13E-26  | Trypsin CFT-1; similar with TRYP_CHOFU                         |
| Px002586.1 | 4.0373 | 5.30E-58  | 6.84E-57  | Trypsin CFT-1; similar with TRYP_CHOFU                         |
| Px013377.1 | 4.0330 | 2.06E-219 | 6.86E-218 | Trypsin; similar with TRYP_PHACE                               |
| Px015276.1 | 4.0315 | 9.55E-65  | 1.33E-63  | Trypsin CFT-1; similar with TRYP_CHOFU                         |
| Px005243.1 | 3.9876 | 0.00E+00  | 0.00E+00  | Trypsin, alkaline A; similar with TRYA_MANSE                   |
| Px015277.1 | 3.9698 | 7.98E-158 | 2.09E-156 | Trypsin CFT-1; similar with TRYP_CHOFU                         |
| Px010313.2 | 3.7896 | 2.43E-106 | 4.78E-105 | Serine proteinase stubble; similar with STUB_DROME             |
| Px006571.1 | 3.7885 | 0.00E+00  | 0.00E+00  | Trypsin, alkaline B; similar with TRYB_MANSE                   |
| Px004048.1 | 3.7053 | 2.38E-30  | 2.09E-29  | Toll-like receptor 6; similar with TLR6_BOVIN                  |
| Px012813.1 | 3.6622 | 2.98E-06  | 1.02E-05  | Serine proteinase stubble; similar with STUB_DROME             |
| Px005239.1 | 3.6181 | 0.00E+00  | 0.00E+00  | Trypsin, alkaline A; similar with TRYA_MANSE                   |
| Px007617.1 | 3.5958 | 0.00E+00  | 0.00E+00  | Trypsin CFT-1; similar with TRYP_CHOFU                         |
| Px006572.1 | 3.4867 | 0.00E+00  | 0.00E+00  | Trypsin; similar with TRYP_PHACE                               |
| Px005765.1 | 3.4325 | 1.33E-62  | 1.82E-61  | Vitellin-degrading protease; similar with VDP_BOMMO            |
| Px016056.1 | 3.4297 | 0.00E+00  | 0.00E+00  | Trypsin, alkaline A; similar with TRYA_MANSE                   |
| Px008538.1 | 3.4202 | 3.15E-138 | 7.39E-137 | Trypsin, alkaline B; similar with TRYB_MANSE                   |
| Px007621.1 | 3.3847 | 6.61E-21  | 4.65E-20  | Trypsin CFT-1; similar with TRYP_CHOFU                         |
| Px014592.1 | 3.3707 | 9.04E-90  | 1.58E-88  | Trypsin CFT-1; similar with TRYP_CHOFU                         |
| Px005238.1 | 3.3700 | 4.57E-59  | 5.96E-58  | Trypsin, alkaline B; similar with TRYB_MANSE                   |
| Px009569.1 | 3.3179 | 0.00E+00  | 0.00E+00  | Trypsin CFT-1; similar with TRYP_CHOFU                         |
| Px007901.1 | 3.2912 | 0.00E+00  | 0.00E+00  | Chymotrypsin BI; similar with CTRB1_LITVA                      |
| Px007599.1 | 3.2567 | 0.00E+00  | 0.00E+00  | Chymotrypsin-1; similar with CTR1_ANOGA                        |
| Px006767.1 | 3.2472 | 1.38E-04  | 3.92E-04  | Chymotrypsin-1; similar with E2BNV4_9HYME                      |
| Px015279.1 | 3.2472 | 1.79E-18  | 1.17E-17  | Trypsin, alkaline A; similar with TRYA_MANSE                   |
| Px012568.1 | 3.2398 | 0.00E+00  | 0.00E+00  | Trypsin CFT-1; similar with TRYP_CHOFU                         |
| Px015278.1 | 3.1962 | 2.10E-27  | 1.75E-26  | Trypsin, alkaline A; similar with TRYA_MANSE                   |
| Px010386.1 | 3.1714 | 0.00E+00  | 0.00E+00  | Trypsin CFT-1; similar with TRYP_CHOFU                         |
| Px016054.1 | 3.1536 | 3.24E-37  | 3.20E-36  | Trypsin; similar with TRYP_PHACE                               |
| Px007619.2 | 3.0951 | 0.00E+00  | 0.00E+00  | Trypsin, alkaline A; similar with TRYA_MANSE                   |
| Px002861.1 | 3.0431 | 0.00E+00  | 0.00E+00  | Trypsin, alkaline C; similar with TRYC_MANSE                   |
| Px009639.1 | 3.0376 | 0.00E+00  | 0.00E+00  | Trypsin CFT-1; similar with TRYP_CHOFU                         |
| Px002457.1 | 2.9802 | 1.14E-158 | 2.99E-157 | Protein dpy-19 homolog 1; similar with D19L1_HUMAN             |
| Px005244.1 | 2.9796 | 7.91E-29  | 6.74E-28  | Trypsin CFT-1; similar with TRYP_CHOFU                         |
| Px015280.1 | 2.9138 | 7.05E-10  | 3.15E-09  | Trypsin CFT-1; similar with TRYP_CHOFU                         |
| Px006570.1 | 2.8972 | 0.00E+00  | 0.00E+00  | Trypsin, alkaline B; similar with TRYB_MANSE                   |
| Px004108.2 | 2.8846 | 2.77E-66  | 3.92E-65  | Heat shock protein 68; similar with HSP68_DROME                |
| Px008604.1 | 2.8677 | 2.19E-157 | 5.71E-156 | AGAP011476-PA; similar with Q7Q343_ANOGA                       |
| Px016057.1 | 2.8626 | 2.00E-77  | 3.18E-76  | Trypsin, alkaline B; similar with TRYB_MANSE                   |
| Px009638.1 | 2.8523 | 0.00E+00  | 0.00E+00  | Trypsin, alkaline B; similar with TRYB_MANSE                   |
| Px002587.1 | 2.7903 | 0.00E+00  | 0.00E+00  | Trypsin CFT-1; similar with TRYP_CHOFU                         |
| Px000107.1 | 2.7335 | 0.00E+00  | 0.00E+00  | Trypsin, alkaline C; similar with TRYC_MANSE                   |
| Px007618.1 | 2.7222 | 1.13E-272 | 4.41E-271 | Trypsin CFT-1; similar with TRYP_CHOFU                         |
| Px011887.1 | 2.7196 | 0.00E+00  | 0.00E+00  | Trypsin, alkaline C; similar with TRYC_MANSE                   |
| Px009286.1 | 2.7141 | 0.00E+00  | 0.00E+00  | Trypsin, alkaline C; similar with TRYC_MANSE                   |
| Px005936.2 | 2.7085 | 3.12E-86  | 5.29E-85  | Trypsin, alkaline C; similar with TRYC_MANSE                   |
| Px002442.1 | 2.6772 | 1.51E-16  | 9.17E-16  | Trypsin, alkaline C; similar with TRYC_MANSE                   |
| Px002865.1 | 2.6726 | 0.00E+00  | 0.00E+00  | Trypsin 5G1; similar with TRY5_AEDAE                           |
| Px002441.1 | 2.6127 | 4.36E-75  | 6.75E-74  | Trypsin, alkaline B; similar with TRYB_MANSE                   |

|            |        |           |           |                                                                      |
|------------|--------|-----------|-----------|----------------------------------------------------------------------|
| Px011889.1 | 2.5691 | 1.52E-21  | 1.09E-20  | Achelase-1; similar with ACH1_LONAC                                  |
| Px007600.1 | 2.5619 | 1.13E-226 | 3.92E-225 | Chymotrypsin-1; similar with CTR1_ANOGA                              |
| Px007675.1 | 2.5233 | 0.00E+00  | 0.00E+00  | Collagenase; similar with COGS_HYPLI                                 |
| Px011248.1 | 2.5102 | 3.46E-05  | 1.06E-04  | Radial spoke head protein 4 homolog A; similar with RSH4A_HUMAN      |
| Px002860.1 | 2.5102 | 4.25E-17  | 2.64E-16  | Achelase-1; similar with ACH1_LONAC                                  |
| Px007677.1 | 2.4787 | 0.00E+00  | 0.00E+00  | Trypsin-7; similar with TRY7_ANOGA                                   |
| Px012582.1 | 2.4724 | 2.13E-127 | 4.68E-126 | Collagenase; similar with COGS_HYPLI                                 |
| Px007552.1 | 2.4696 | 1.06E-167 | 2.91E-166 | Paramyosin, putative; similar with E0VGP7_PEDHC                      |
| Px009488.1 | 2.4558 | 6.08E-05  | 1.81E-04  | Chymotrypsin-like serine proteinase; similar with CTRL_HALRU         |
| Px016058.1 | 2.4185 | 0.00E+00  | 0.00E+00  | Trypsin, alkaline C; similar with TRYC_MANSE                         |
| Px002588.1 | 2.4151 | 4.81E-14  | 2.66E-13  | Trypsin, alkaline C; similar with TRYC_MANSE                         |
| Px010489.1 | 2.4085 | 6.89E-66  | 9.73E-65  | Trypsin, alkaline C; similar with TRYC_MANSE                         |
| Px009287.1 | 2.4027 | 1.27E-279 | 5.09E-278 | Trypsin CFT-1; similar with TRYP_CHOFU                               |
| Px009395.1 | 2.3871 | 1.03E-17  | 6.47E-17  | Proclotting enzyme; similar with PCE_TACTR                           |
| Px007616.1 | 2.3746 | 1.09E-158 | 2.87E-157 | Trypsin CFT-1; similar with TRYP_CHOFU                               |
| Px005242.1 | 2.3668 | 2.59E-19  | 1.73E-18  | Trypsin CFT-1; similar with TRYP_CHOFU                               |
| Px002589.1 | 2.3435 | 3.45E-96  | 6.29E-95  | Trypsin, alkaline A; similar with TRYA_MANSE                         |
| Px015275.1 | 2.3286 | 0.00E+00  | 0.00E+00  | Trypsin CFT-1; similar with TRYP_CHOFU                               |
| Px010499.1 | 2.3073 | 3.86E-59  | 5.04E-58  | Serine/threonine-protein kinase pelle; similar with KPEL_DROME       |
| Px007601.1 | 2.2954 | 3.63E-31  | 3.23E-30  | Chymotrypsin-1; similar with CTR1_ANOGA                              |
| Px013205.1 | 2.2558 | 4.92E-55  | 6.10E-54  | Putative uncharacterized protein; similar with D6WHY1_TRICA          |
| Px017515.1 | 2.2558 | 2.50E-108 | 4.98E-107 | Trypsin, alkaline C; similar with TRYC_MANSE                         |
| Px009567.1 | 2.2552 | 3.00E-104 | 5.83E-103 | Trypsin, alkaline B; similar with TRYB_MANSE                         |
| Px009566.1 | 2.2251 | 1.29E-259 | 4.84E-258 | Trypsin, alkaline C; similar with TRYC_MANSE                         |
| Px000771.1 | 2.1857 | 1.04E-117 | 2.18E-116 | Trypsin CFT-1; similar with TRYP_CHOFU                               |
| Px011886.1 | 2.1750 | 1.89E-125 | 4.14E-124 | Trypsin CFT-1; similar with TRYP_CHOFU                               |
| Px001239.1 | 2.1600 | 2.79E-38  | 2.80E-37  | Serine protease P162; similar with D2A5Y8_TRICA                      |
| Px001833.1 | 2.0603 | 0.00E+00  | 0.00E+00  | Serine protease easter; similar with EAST_DROME                      |
| Px004167.1 | 2.0469 | 1.15E-06  | 4.06E-06  | Plasma kallikrein; similar with KLKB1_MOUSE                          |
| Px012569.1 | 2.0285 | 0.00E+00  | 0.00E+00  | Trypsin, alkaline C; similar with TRYC_MANSE                         |
| Px009870.1 | 2.0232 | 0.00E+00  | 0.00E+00  | Inter-alpha-trypsin inhibitor heavy chain H5-like protein            |
| Px002440.1 | 2.0145 | 2.30E-21  | 1.64E-20  | Trypsin, alkaline B; similar with TRYB_MANSE                         |
| Px006985.1 | 1.9682 | 0.00E+00  | 0.00E+00  | Putative uncharacterized protein; similar with B1NLD7_HELAM          |
| Px012570.1 | 1.9654 | 0.00E+00  | 0.00E+00  | Trypsin CFT-1; similar with TRYP_CHOFU                               |
| Px003725.1 | 1.9489 | 6.60E-74  | 1.01E-72  | Interleukin-1 receptor-associated kinase 4; similar with IRAK4_BOVIN |
| Px011097.1 | 1.9460 | 2.65E-10  | 1.22E-09  | Serine proteinase stubble; similar with STUB_DROME                   |
| Px007201.5 | 1.9364 | 7.77E-18  | 4.93E-17  | Tyrosine recombinase; similar with Q68SM2_TRICA                      |
| Px008682.1 | 1.9277 | 7.20E-14  | 3.94E-13  | Coagulation factor XI; similar with FA11_HUMAN                       |
| Px010975.1 | 1.8944 | 5.90E-09  | 2.48E-08  | Trypsin, alkaline C; similar with TRYC_MANSE                         |
| Px002866.1 | 1.8658 | 5.28E-09  | 2.23E-08  | Trypsin, alkaline A; similar with TRYA_MANSE                         |
| Px008406.1 | 1.8639 | 2.77E-08  | 1.10E-07  | Serine proteinase stubble; similar with STUB_DROME                   |
| Px013665.3 | 1.8475 | 2.46E-37  | 2.43E-36  | Collagenase; similar with COGS_HYPLI                                 |
| Px012329.1 | 1.7693 | 5.39E-84  | 8.95E-83  | Serine protease persephone; similar with PSH_DROME                   |
| Px015180.1 | 1.7466 | 2.09E-49  | 2.45E-48  | ADP,ATP carrier protein; similar with ADT_DROME                      |
| Px011231.1 | 1.7453 | 1.76E-27  | 1.46E-26  | Protein unc-50 homolog; similar with UNC50_DROME                     |
| Px000402.2 | 1.6821 | 5.77E-83  | 9.50E-82  | Serine protease persephone; similar with PSH_DROME                   |
| Px004977.1 | 1.6799 | 1.55E-260 | 5.85E-259 | Transcription factor AP-1; similar with JRA_DROME                    |
| Px009088.1 | 1.6795 | 5.48E-174 | 1.55E-172 | Mastin; similar with TRYM_CANFA                                      |
| Px013101.1 | 1.6622 | 3.21E-06  | 1.09E-05  | Nose resistant to fluoxetine protein 6; similar with NRF6_CAEEL      |
| Px005342.1 | 1.6408 | 3.80E-156 | 9.82E-155 | Collagenase; similar with COGS_HYPLI                                 |
| Px001556.1 | 1.6061 | 8.94E-117 | 1.85E-115 | Serine protease easter; similar with EAST_DROME                      |
| Px005490.1 | 1.5819 | 5.31E-62  | 7.19E-61  | Inhibitor of nuclear factor kappa-B kinase subunit beta              |
| Px005960.1 | 1.5748 | 5.55E-09  | 2.34E-08  | Putative uncharacterized protein; similar with D6W9B6_TRICA          |
| Px013162.1 | 1.5740 | 7.41E-151 | 1.88E-149 | Serine protease snake; similar with SNAK_DROME                       |

|            |         |           |           |                                                            |
|------------|---------|-----------|-----------|------------------------------------------------------------|
| Px005340.1 | 1.5499  | 1.24E-139 | 2.94E-138 | Collagenase; similar with COGS_HYPLI                       |
| Px014831.2 | 1.4467  | 0.00E+00  | 0.00E+00  | Serine proteinase stubble; similar with STUB_DROME         |
| Px009011.1 | 1.4129  | 6.79E-05  | 2.01E-04  | Tyrosine-protein kinase hopscotch; similar with JAK_DROME  |
| Px009568.1 | 1.3992  | 1.23E-04  | 3.53E-04  | Trypsin, alkaline C; similar with TRYC_MANSE               |
| Px005341.1 | 1.3783  | 1.92E-45  | 2.13E-44  | Collagenase; similar with COGS_HYPLI                       |
| Px004105.1 | 1.3645  | 1.30E-23  | 9.72E-23  | Heat shock protein 68; similar with HSP68_DROME            |
| Px005947.1 | 1.3627  | 2.45E-06  | 8.39E-06  | Serine proteinase stubble; similar with STUB_DROME         |
| Px015363.1 | 1.2365  | 5.17E-05  | 1.55E-04  | Slit homolog 3 protein; similar with SLIT3_MOUSE           |
| Px005175.1 | 1.2331  | 1.71E-19  | 1.16E-18  | Uncharacterized protein KIAA1109; similar with K1109_MOUSE |
| Px011499.2 | 1.1964  | 1.89E-18  | 1.23E-17  | Serine protease persephone; similar with PSH_DROME         |
| Px017224.1 | 1.1915  | 1.34E-11  | 6.59E-11  | Chaoptin; similar with CHAO_DROME                          |
| Px014830.1 | 1.1646  | 9.91E-167 | 2.71E-165 | Tryptase; similar with TRYB1_MOUSE                         |
| Px003670.2 | 1.1636  | 0.00E+00  | 0.00E+00  | Serine protease easter; similar with EAST_DROME            |
| Px010855.1 | 1.1350  | 3.54E-11  | 1.72E-10  | Trypsin, alkaline A; similar with TRYA_MANSE               |
| Px011525.1 | 1.0996  | 2.63E-07  | 9.80E-07  | Programmed cell death protein 4; similar with PDCD4_CHICK  |
| Px006234.1 | 1.0631  | 1.55E-14  | 8.69E-14  | Chaoptin; similar with CHAO_DROME                          |
| Px008341.1 | 1.0613  | 2.09E-24  | 1.59E-23  | Mitochondrial fission 1 protein; similar with FIS1_HUMAN   |
| Px001401.1 | 1.0591  | 1.02E-04  | 2.94E-04  | Apolipoporphins; similar with APLP_MANSE                   |
| Px016983.3 | 1.0379  | 6.64E-09  | 2.78E-08  | Serine proteinase stubble; similar with STUB_DROME         |
| Px001873.1 | -2.5077 | 3.78E-06  | 1.28E-05  | Probable palmitoyltransferase ZDHHC8                       |
| Px009322.1 | -1.8126 | 2.19E-185 | 6.48E-184 | Unknown functio                                            |
| Px014636.1 | -1.5417 | 2.28E-04  | 6.26E-04  | Trypsin-1; similar with TRY1_ANOGA                         |
| Px013456.1 | -1.4780 | 9.11E-21  | 6.38E-20  | Actin, clone 211; similar with ACT2_ARTSX                  |
| Px003076.1 | -1.3663 | 2.09E-05  | 6.52E-05  | Chaoptin; similar with CHAO_DROME                          |
| Px003840.1 | -1.3269 | 0.00E+00  | 0.00E+00  | Actin, muscle; similar with ACT_MANSE                      |
| Px014679.1 | -1.2335 | 5.49E-08  | 2.14E-07  | Neuromedin-B receptor; similar with NMBR_MOUSE             |
| Px009400.1 | -1.1378 | 3.13E-04  | 8.48E-04  | Protein IWS1 homolog; similar with IWS1_RAT                |
| Px012579.1 | -1.0801 | 1.12E-29  | 9.70E-29  | mRNA export factor; similar with RAEL1_PIG                 |
| Px003808.1 | -1.0231 | 0.00E+00  | 0.00E+00  | Actin, muscle; similar with ACT_MANSE                      |
| Px006532.1 | -1.0165 | 1.80E-78  | 2.87E-77  | Eukaryotic translation initiation factor 2 subunit 1       |

### Involved in neuroactive ligand-receptor interaction

|            |         |           |           |                                                             |
|------------|---------|-----------|-----------|-------------------------------------------------------------|
| Px007620.1 | 10.3950 | 8.15E-10  | 3.63E-09  | Trypsin CFT-1; similar with TRYP_CHOFU                      |
| Px006069.1 | 10.0136 | 2.26E-06  | 7.79E-06  | Trypsin CFT-1; similar with TRYP_CHOFU                      |
| Px008696.1 | 8.2447  | 0.00E+00  | 0.00E+00  | Osiris 9; similar with B6DXB0_BOMMO                         |
| Px006417.1 | 7.5446  | 3.51E-04  | 9.44E-04  | Glutamate receptor 1; similar with GLK1_DROME               |
| Px000336.1 | 6.9841  | 2.20E-107 | 4.36E-106 | Osiris 20; similar with B6DXA7_BOMMO                        |
| Px008830.1 | 6.6433  | 1.43E-111 | 2.90E-110 | Trypsin, alkaline C; similar with TRYC_MANSE                |
| Px001804.1 | 6.5119  | 2.83E-51  | 3.39E-50  | Trypsin, alkaline B; similar with TRYB_MANSE                |
| Px007670.1 | 6.2472  | 5.75E-63  | 7.92E-62  | Proclotting enzyme; similar with PCE_TACTR                  |
| Px007357.2 | 5.3379  | 0.00E+00  | 0.00E+00  | Serine proteinase stubble; similar with STUB_DROME          |
| Px010971.1 | 5.2472  | 1.05E-10  | 4.92E-10  | Trypsin CFT-1; similar with TRYP_CHOFU                      |
| Px012645.1 | 5.1711  | 0.00E+00  | 0.00E+00  | Neurofilament heavy polypeptide; similar with NFH_RAT       |
| Px005240.1 | 5.1310  | 8.24E-124 | 1.79E-122 | Trypsin, alkaline A; similar with TRYA_MANSE                |
| Px014882.1 | 4.8506  | 4.25E-162 | 1.13E-160 | Trypsin, alkaline C; similar with TRYC_MANSE                |
| Px006831.1 | 4.8288  | 0.00E+00  | 0.00E+00  | Putative uncharacterized protein; similar with D6X0U7_TRICA |
| Px008162.1 | 4.7017  | 7.16E-20  | 4.90E-19  | Putative uncharacterized protein; similar with Q16SC6_AEDAE |
| Px005554.1 | 4.6008  | 8.20E-07  | 2.93E-06  | Chymotrypsin-1; similar with CTR1_ANOGA                     |
| Px016100.1 | 4.5930  | 1.02E-46  | 1.15E-45  | Coagulation factor IX; similar with FA9_RABIT               |
| Px016055.1 | 4.5497  | 4.52E-56  | 5.70E-55  | Trypsin, alkaline C; similar with TRYC_MANSE                |
| Px002864.1 | 4.5298  | 1.55E-103 | 3.01E-102 | Trypsin, alkaline B; similar with TRYB_MANSE                |
| Px005241.1 | 4.3794  | 1.43E-53  | 1.74E-52  | Trypsin CFT-1; similar with TRYP_CHOFU                      |
| Px007598.1 | 4.3759  | 1.54E-119 | 3.27E-118 | Chymotrypsin-1; similar with CTR1_ANOGA                     |
| Px016053.1 | 4.2124  | 5.01E-59  | 6.53E-58  | Trypsin; similar with TRYP_PHACE                            |

|            |        |           |           |                                                                 |
|------------|--------|-----------|-----------|-----------------------------------------------------------------|
| Px009637.1 | 4.1028 | 1.35E-27  | 1.13E-26  | Trypsin CFT-1; similar with TRYP_CHOFU                          |
| Px002586.1 | 4.0373 | 5.30E-58  | 6.84E-57  | Trypsin CFT-1; similar with TRYP_CHOFU                          |
| Px013377.1 | 4.0330 | 2.06E-219 | 6.86E-218 | Trypsin; similar with TRYP_PHACE                                |
| Px015276.1 | 4.0315 | 9.55E-65  | 1.33E-63  | Trypsin CFT-1; similar with TRYP_CHOFU                          |
| Px005243.1 | 3.9876 | 0.00E+00  | 0.00E+00  | Trypsin, alkaline A; similar with TRYA_MANSE                    |
| Px015277.1 | 3.9698 | 7.98E-158 | 2.09E-156 | Trypsin CFT-1; similar with TRYP_CHOFU                          |
| Px010313.2 | 3.7896 | 2.43E-106 | 4.78E-105 | Serine proteinase stubble; similar with STUB_DROME              |
| Px006571.1 | 3.7885 | 0.00E+00  | 0.00E+00  | Trypsin, alkaline B; similar with TRYB_MANSE                    |
| Px012813.1 | 3.6622 | 2.98E-06  | 1.02E-05  | Serine proteinase stubble; similar with STUB_DROME              |
| Px005239.1 | 3.6181 | 0.00E+00  | 0.00E+00  | Trypsin, alkaline A; similar with TRYA_MANSE                    |
| Px007617.1 | 3.5958 | 0.00E+00  | 0.00E+00  | Trypsin CFT-1; similar with TRYP_CHOFU                          |
| Px006572.1 | 3.4867 | 0.00E+00  | 0.00E+00  | Trypsin; similar with TRYP_PHACE                                |
| Px004597.2 | 3.4696 | 2.05E-05  | 6.43E-05  | Thyrotropin-releasing hormone receptor; similar with TRFR_RAT   |
| Px005765.1 | 3.4325 | 1.33E-62  | 1.82E-61  | Vitellin-degrading protease; similar with VDP_BOMMO             |
| Px016056.1 | 3.4297 | 0.00E+00  | 0.00E+00  | Trypsin, alkaline A; similar with TRYA_MANSE                    |
| Px008538.1 | 3.4202 | 3.15E-138 | 7.39E-137 | Trypsin, alkaline B; similar with TRYB_MANSE                    |
| Px007621.1 | 3.3847 | 6.61E-21  | 4.65E-20  | Trypsin CFT-1; similar with TRYP_CHOFU                          |
| Px014592.1 | 3.3707 | 9.04E-90  | 1.58E-88  | Trypsin CFT-1; similar with TRYP_CHOFU                          |
| Px005238.1 | 3.3700 | 4.57E-59  | 5.96E-58  | Trypsin, alkaline B; similar with TRYB_MANSE                    |
| Px009569.1 | 3.3179 | 0.00E+00  | 0.00E+00  | Trypsin CFT-1; similar with TRYP_CHOFU                          |
| Px007901.1 | 3.2912 | 0.00E+00  | 0.00E+00  | Chymotrypsin BI; similar with CTRB1_LITVA                       |
| Px008319.1 | 3.2789 | 4.00E-10  | 1.82E-09  | Glutamate receptor 1; similar with GLR1_CAEEL                   |
| Px007599.1 | 3.2567 | 0.00E+00  | 0.00E+00  | Chymotrypsin-1; similar with CTR1_ANOGA                         |
| Px002306.1 | 3.2472 | 7.34E-34  | 6.82E-33  | Calcitonin receptor; similar with CALCR_RABIT                   |
| Px006767.1 | 3.2472 | 1.38E-04  | 3.92E-04  | Chymotrypsin-1; similar with E2BNV4_9HYME                       |
| Px015279.1 | 3.2472 | 1.79E-18  | 1.17E-17  | Trypsin, alkaline A; similar with TRYA_MANSE                    |
| Px012568.1 | 3.2398 | 0.00E+00  | 0.00E+00  | Trypsin CFT-1; similar with TRYP_CHOFU                          |
| Px015278.1 | 3.1962 | 2.10E-27  | 1.75E-26  | Trypsin, alkaline A; similar with TRYA_MANSE                    |
| Px010386.1 | 3.1714 | 0.00E+00  | 0.00E+00  | Trypsin CFT-1; similar with TRYP_CHOFU                          |
| Px016054.1 | 3.1536 | 3.24E-37  | 3.20E-36  | Trypsin; similar with TRYP_PHACE                                |
| Px007383.1 | 3.1028 | 1.03E-11  | 5.14E-11  | PDF receptor; similar with PDFR_DROME                           |
| Px007619.2 | 3.0951 | 0.00E+00  | 0.00E+00  | Trypsin, alkaline A; similar with TRYA_MANSE                    |
| Px012032.1 | 3.0773 | 4.83E-07  | 1.76E-06  | Transposon Ty3-G Gag-Pol polyprotein; similar with YG31B_YEAST  |
| Px002861.1 | 3.0431 | 0.00E+00  | 0.00E+00  | Trypsin, alkaline C; similar with TRYC_MANSE                    |
| Px009639.1 | 3.0376 | 0.00E+00  | 0.00E+00  | Trypsin CFT-1; similar with TRYP_CHOFU                          |
| Px006830.1 | 3.0315 | 8.88E-07  | 3.17E-06  | Putative uncharacterized protein; similar with Q16SC6_AEDAE     |
| Px005244.1 | 2.9796 | 7.91E-29  | 6.74E-28  | Trypsin CFT-1; similar with TRYP_CHOFU                          |
| Px015280.1 | 2.9138 | 7.05E-10  | 3.15E-09  | Trypsin CFT-1; similar with TRYP_CHOFU                          |
| Px006570.1 | 2.8972 | 0.00E+00  | 0.00E+00  | Trypsin, alkaline B; similar with TRYB_MANSE                    |
| Px016057.1 | 2.8626 | 2.00E-77  | 3.18E-76  | Trypsin, alkaline B; similar with TRYB_MANSE                    |
| Px009638.1 | 2.8523 | 0.00E+00  | 0.00E+00  | Trypsin, alkaline B; similar with TRYB_MANSE                    |
| Px002587.1 | 2.7903 | 0.00E+00  | 0.00E+00  | Trypsin CFT-1; similar with TRYP_CHOFU                          |
| Px010727.3 | 2.7386 | 4.24E-97  | 7.77E-96  | Transposon Ty3-I Gag-Pol polyprotein; similar with YI31B_YEAST  |
| Px000107.1 | 2.7335 | 0.00E+00  | 0.00E+00  | Trypsin, alkaline C; similar with TRYC_MANSE                    |
| Px007618.1 | 2.7222 | 1.13E-272 | 4.41E-271 | Trypsin CFT-1; similar with TRYP_CHOFU                          |
| Px011887.1 | 2.7196 | 0.00E+00  | 0.00E+00  | Trypsin, alkaline C; similar with TRYC_MANSE                    |
| Px009286.1 | 2.7141 | 0.00E+00  | 0.00E+00  | Trypsin, alkaline C; similar with TRYC_MANSE                    |
| Px005936.2 | 2.7085 | 3.12E-86  | 5.29E-85  | Trypsin, alkaline C; similar with TRYC_MANSE                    |
| Px002442.1 | 2.6772 | 1.51E-16  | 9.17E-16  | Trypsin, alkaline C; similar with TRYC_MANSE                    |
| Px002865.1 | 2.6726 | 0.00E+00  | 0.00E+00  | Trypsin 5G1; similar with TRY5_AEDAE                            |
| Px002441.1 | 2.6127 | 4.36E-75  | 6.75E-74  | Trypsin, alkaline B; similar with TRYB_MANSE                    |
| Px011889.1 | 2.5691 | 1.52E-21  | 1.09E-20  | Achelase-1; similar with ACH1_LONAC                             |
| Px007600.1 | 2.5619 | 1.13E-226 | 3.92E-225 | Chymotrypsin-1; similar with CTR1_ANOGA                         |
| Px008529.1 | 2.5323 | 1.56E-49  | 1.83E-48  | Thyrotropin-releasing hormone receptor; similar with TRFR_CHICK |

|            |        |           |           |                                                                |
|------------|--------|-----------|-----------|----------------------------------------------------------------|
| Px007675.1 | 2.5233 | 0.00E+00  | 0.00E+00  | Collagenase; similar with COGS_HYPLI                           |
| Px002860.1 | 2.5102 | 4.25E-17  | 2.64E-16  | Achelase-1; similar with ACH1_LONAC                            |
| Px007677.1 | 2.4787 | 0.00E+00  | 0.00E+00  | Trypsin-7; similar with TRY7_ANOGA                             |
| Px012582.1 | 2.4724 | 2.13E-127 | 4.68E-126 | Collagenase; similar with COGS_HYPLI                           |
| Px009488.1 | 2.4558 | 6.08E-05  | 1.81E-04  | Chymotrypsin-like serine proteinase; similar with CTRL_HALRU   |
| Px016058.1 | 2.4185 | 0.00E+00  | 0.00E+00  | Trypsin, alkaline C; similar with TRYC_MANSE                   |
| Px002588.1 | 2.4151 | 4.81E-14  | 2.66E-13  | Trypsin, alkaline C; similar with TRYC_MANSE                   |
| Px010489.1 | 2.4085 | 6.89E-66  | 9.73E-65  | Trypsin, alkaline C; similar with TRYC_MANSE                   |
| Px009287.1 | 2.4027 | 1.27E-279 | 5.09E-278 | Trypsin CFT-1; similar with TRYP_CHOFU                         |
| Px009395.1 | 2.3871 | 1.03E-17  | 6.47E-17  | Proclotting enzyme; similar with PCE_TACTR                     |
| Px007616.1 | 2.3746 | 1.09E-158 | 2.87E-157 | Trypsin CFT-1; similar with TRYP_CHOFU                         |
| Px005803.1 | 2.3700 | 5.55E-94  | 9.94E-93  | Allatostatin-A receptor; similar with AR_BOMMO                 |
| Px005242.1 | 2.3668 | 2.59E-19  | 1.73E-18  | Trypsin CFT-1; similar with TRYP_CHOFU                         |
| Px002589.1 | 2.3435 | 3.45E-96  | 6.29E-95  | Trypsin, alkaline A; similar with TRYA_MANSE                   |
| Px015275.1 | 2.3286 | 0.00E+00  | 0.00E+00  | Trypsin CFT-1; similar with TRYP_CHOFU                         |
| Px007601.1 | 2.2954 | 3.63E-31  | 3.23E-30  | Chymotrypsin-1; similar with CTR1_ANOGA                        |
| Px017515.1 | 2.2558 | 2.50E-108 | 4.98E-107 | Trypsin, alkaline C; similar with TRYC_MANSE                   |
| Px009567.1 | 2.2552 | 3.00E-104 | 5.83E-103 | Trypsin, alkaline B; similar with TRYB_MANSE                   |
| Px009566.1 | 2.2251 | 1.29E-259 | 4.84E-258 | Trypsin, alkaline C; similar with TRYC_MANSE                   |
| Px010612.1 | 2.1991 | 5.97E-76  | 9.32E-75  | Serine/arginine repetitive matrix protein 5                    |
| Px000584.1 | 2.1984 | 3.86E-96  | 7.02E-95  | Coagulation factor X; similar with FA10_RAT                    |
| Px000771.1 | 2.1857 | 1.04E-117 | 2.18E-116 | Trypsin CFT-1; similar with TRYP_CHOFU                         |
| Px011886.1 | 2.1750 | 1.89E-125 | 4.14E-124 | Trypsin CFT-1; similar with TRYP_CHOFU                         |
| Px001239.1 | 2.1600 | 2.79E-38  | 2.80E-37  | Serine protease P162; similar with D2A5Y8_TRICA                |
| Px010923.3 | 2.1086 | 9.06E-29  | 7.72E-28  | Putative uncharacterized protein; similar with Q17GL6_AEDAE    |
| Px004263.3 | 2.0773 | 1.72E-18  | 1.12E-17  | Retrotransposable element Tf2 155 kDa protein type 1           |
| Px001833.1 | 2.0603 | 0.00E+00  | 0.00E+00  | Serine protease easter; similar with EAST_DROME                |
| Px004167.1 | 2.0469 | 1.15E-06  | 4.06E-06  | Plasma kallikrein; similar with KLKB1_MOUSE                    |
| Px012569.1 | 2.0285 | 0.00E+00  | 0.00E+00  | Trypsin, alkaline C; similar with TRYC_MANSE                   |
| Px002440.1 | 2.0145 | 2.30E-21  | 1.64E-20  | Trypsin, alkaline B; similar with TRYB_MANSE                   |
| Px012570.1 | 1.9654 | 0.00E+00  | 0.00E+00  | Trypsin CFT-1; similar with TRYP_CHOFU                         |
| Px011097.1 | 1.9460 | 2.65E-10  | 1.22E-09  | Serine proteinase stubble; similar with STUB_DROME             |
| Px010975.1 | 1.8944 | 5.90E-09  | 2.48E-08  | Trypsin, alkaline C; similar with TRYC_MANSE                   |
| Px002866.1 | 1.8658 | 5.28E-09  | 2.23E-08  | Trypsin, alkaline A; similar with TRYA_MANSE                   |
| Px008406.1 | 1.8639 | 2.77E-08  | 1.10E-07  | Serine proteinase stubble; similar with STUB_DROME             |
| Px013665.3 | 1.8475 | 2.46E-37  | 2.43E-36  | Collagenase; similar with COGS_HYPLI                           |
| Px005124.5 | 1.8306 | 2.07E-24  | 1.58E-23  | Transposon Ty3-I Gag-Pol polyprotein; similar with YI31B_YEAST |
| Px012329.1 | 1.7693 | 5.39E-84  | 8.95E-83  | Serine protease persephone; similar with PSH_DROME             |
| Px011231.1 | 1.7453 | 1.76E-27  | 1.46E-26  | Protein unc-50 homolog; similar with UNC50_DROME               |
| Px014054.1 | 1.7402 | 9.14E-05  | 2.66E-04  | Retrovirus-related Pol polyprotein from transposon 297         |
| Px000402.2 | 1.6821 | 5.77E-83  | 9.50E-82  | Serine protease persephone; similar with PSH_DROME             |
| Px009088.1 | 1.6795 | 5.48E-174 | 1.55E-172 | Mastin; similar with TRYM_CANFA                                |
| Px008995.1 | 1.6622 | 2.29E-04  | 6.29E-04  | Uncharacterized protein K02A2.6; similar with YRD6_CAEEL       |
| Px005342.1 | 1.6408 | 3.80E-156 | 9.82E-155 | Collagenase; similar with COGS_HYPLI                           |
| Px001556.1 | 1.6061 | 8.94E-117 | 1.85E-115 | Serine protease easter; similar with EAST_DROME                |
| Px016723.1 | 1.5918 | 1.63E-04  | 4.61E-04  | Calcitonin receptor; similar with CALCR_CAVPO                  |
| Px013974.1 | 1.5808 | 3.97E-38  | 3.98E-37  | Leucine-rich repeat transmembrane neuronal protein 4           |
| Px013162.1 | 1.5740 | 7.41E-151 | 1.88E-149 | Serine protease snake; similar with SNAK_DROME                 |
| Px007239.2 | 1.5579 | 9.66E-11  | 4.55E-10  | Diuretic hormone receptor; similar with DIHR_MANSE             |
| Px005340.1 | 1.5499 | 1.24E-139 | 2.94E-138 | Collagenase; similar with COGS_HYPLI                           |
| Px014831.2 | 1.4467 | 0.00E+00  | 0.00E+00  | Serine proteinase stubble; similar with STUB_DROME             |
| Px009568.1 | 1.3992 | 1.23E-04  | 3.53E-04  | Trypsin, alkaline C; similar with TRYC_MANSE                   |
| Px005341.1 | 1.3783 | 1.92E-45  | 2.13E-44  | Collagenase; similar with COGS_HYPLI                           |
| Px005947.1 | 1.3627 | 2.45E-06  | 8.39E-06  | Serine proteinase stubble; similar with STUB_DROME             |

|            |         |           |           |                                                                    |
|------------|---------|-----------|-----------|--------------------------------------------------------------------|
| Px011101.1 | 1.3474  | 1.36E-56  | 1.73E-55  | Coagulation factor X; similar with FA10_RAT                        |
| Px013795.1 | 1.2837  | 8.08E-05  | 2.37E-04  | Putative neuropeptide Y receptor 11; similar with NPR11_CAEEL      |
| Px015363.1 | 1.2365  | 5.17E-05  | 1.55E-04  | Slit homolog 3 protein; similar with SLIT3_MOUSE                   |
| Px000103.2 | 1.2217  | 3.55E-133 | 8.06E-132 | Prothrombin; similar with THRB_MOUSE                               |
| Px012531.1 | 1.2148  | 7.44E-05  | 2.19E-04  | Transposon Ty3-I Gag-Pol polyprotein; similar with YI31B_YEAST     |
| Px011499.2 | 1.1964  | 1.89E-18  | 1.23E-17  | Serine protease persephone; similar with PSH_DROME                 |
| Px014830.1 | 1.1646  | 9.91E-167 | 2.71E-165 | Trypsin; similar with TRYB1_MOUSE                                  |
| Px003670.2 | 1.1636  | 0.00E+00  | 0.00E+00  | Serine protease easter; similar with EAST_DROME                    |
| Px010855.1 | 1.1350  | 3.54E-11  | 1.72E-10  | Trypsin, alkaline A; similar with TRYA_MANSE                       |
| Px009755.1 | 1.0920  | 5.93E-41  | 6.20E-40  | Seminal fluid protein HACP060; similar with D9HQ61_9NEOP           |
| Px016983.3 | 1.0379  | 6.64E-09  | 2.78E-08  | Serine proteinase stubble; similar with STUB_DROME                 |
| Px000816.1 | 1.0221  | 1.94E-04  | 5.41E-04  | Retrotransposable element Tf2 155 kDa protein type 1               |
| Px002244.1 | 1.0207  | 2.03E-06  | 7.05E-06  | Transposon Ty3-I Gag-Pol polyprotein; similar with YI31B_YEAST     |
| Px013175.1 | #####   | 1.24E-05  | 3.96E-05  | Alpha-2B adrenergic receptor; similar with ADA2B_DANRE             |
| Px001248.1 | -8.6456 | 1.78E-04  | 4.98E-04  | Orexin receptor type 2; similar with OX2R_CANFA                    |
| Px011383.1 | -2.1912 | 1.92E-07  | 7.25E-07  | Glutamate receptor, ionotropic kainate 3; similar with GRIK3_HUMAN |
| Px014636.1 | -1.5417 | 2.28E-04  | 6.26E-04  | Trypsin-1; similar with TRY1_ANOGA                                 |
| Px004913.1 | -1.4985 | 4.34E-286 | 1.75E-284 | Putative uncharacterized protein; similar with D6W9I4_TRICA        |
| Px002218.1 | -1.4791 | 3.99E-08  | 1.58E-07  | Beta-1 adrenergic receptor; similar with ADRB1_SHEEP               |
| Px014434.1 | -1.3509 | 4.77E-159 | 1.26E-157 | Retrotransposable element Tf2 155 kDa protein type 1               |
| Px008527.1 | -1.3308 | 2.46E-09  | 1.06E-08  | Retrotransposable element Tf2 155 kDa protein type 1               |
| Px014679.1 | -1.2335 | 5.49E-08  | 2.14E-07  | Neuromedin-B receptor; similar with NMBR_MOUSE                     |
| Px010171.1 | -1.2264 | 2.92E-19  | 1.95E-18  | Retrovirus-related Pol polyprotein from transposon opus            |
| Px002358.1 | -1.1094 | 9.76E-12  | 4.86E-11  | Glutamate receptor, ionotropic kainate 3; similar with GRIK3_HUMAN |
| Px000929.1 | -1.0927 | 2.38E-04  | 6.54E-04  | Octopamine receptor beta-2R; similar with OCTB2_DROME              |
| Px015204.1 | -1.0896 | 0.00E+00  | 0.00E+00  | Transposon Ty3-I Gag-Pol polyprotein; similar with YI31B_YEAST     |
| Px002507.1 | -1.0338 | 1.62E-05  | 5.14E-05  | Glutamate receptor, ionotropic kainate 2; similar with GRIK2_HUMAN |

### Involved in glycerolipid metabolism

|            |         |           |           |                                                               |
|------------|---------|-----------|-----------|---------------------------------------------------------------|
| Px000644.1 | 12.4260 | 4.78E-37  | 4.70E-36  | Pancreatic triacylglycerol lipase; similar with LIPP_MOUSE    |
| Px012560.1 | 10.5968 | 1.26E-07  | 4.83E-07  | Lipase member H-B; similar with LIPHB_XENLA                   |
| Px004749.1 | 4.2513  | 0.00E+00  | 0.00E+00  | Lipoprotein lipase; similar with LIPL_CAVPO                   |
| Px000948.1 | 4.2472  | 2.43E-05  | 7.55E-05  | Gastric triacylglycerol lipase; similar with LIPG_RAT         |
| Px012694.3 | 4.1304  | 9.29E-40  | 9.57E-39  | Lipase 1; similar with LIP1_DROME                             |
| Px011791.1 | 4.1145  | 0.00E+00  | 0.00E+00  | Lipase member H; similar with LIPH_XENTR                      |
| Px012011.2 | 4.0620  | 0.00E+00  | 0.00E+00  | Pancreatic triacylglycerol lipase; similar with LIPP_MYOCO    |
| Px004815.1 | 3.9017  | 3.38E-20  | 2.32E-19  | Gut esterase 1; similar with EST1_CAEEL                       |
| Px007180.1 | 3.8846  | 2.52E-32  | 2.29E-31  | Juvenile hormone esterase; similar with ESTJ_HELVI            |
| Px005805.1 | 3.8398  | 5.29E-43  | 5.67E-42  | Lipase 1; similar with LIP1_DROME                             |
| Px005804.1 | 3.4363  | 2.24E-142 | 5.42E-141 | Lipase 1; similar with LIP1_DROME                             |
| Px009940.2 | 3.4221  | 6.33E-52  | 7.64E-51  | Acetylcholinesterase; similar with ACES_CULPI                 |
| Px011477.2 | 3.1975  | 0.00E+00  | 0.00E+00  | Lipase 1; similar with LIP1_DROME                             |
| Px003352.1 | 3.1927  | 1.50E-30  | 1.32E-29  | Venom carboxylesterase-6; similar with EST6_APIME             |
| Px001526.1 | 3.1070  | 4.54E-37  | 4.47E-36  | Lipase 1; similar with LIP1_DROME                             |
| Px000371.1 | 3.0476  | 0.00E+00  | 0.00E+00  | Lipase 1; similar with LIP1_DROME                             |
| Px012695.1 | 2.9423  | 3.93E-150 | 9.92E-149 | Lipase 1; similar with LIP1_DROME                             |
| Px011683.2 | 2.9306  | 0.00E+00  | 0.00E+00  | Venom carboxylesterase-6; similar with EST6_APIME             |
| Px008089.1 | 2.8762  | 0.00E+00  | 0.00E+00  | Pancreatic lipase-related protein 2; similar with LIPR2_CAVPO |
| Px006190.1 | 2.8647  | 0.00E+00  | 0.00E+00  | Lipase member H-A; similar with LIPHA_XENLA                   |
| Px011788.2 | 2.8400  | 3.24E-222 | 1.09E-220 | Pancreatic lipase-related protein 2; similar with LIPR2_BOVIN |
| Px008088.2 | 2.8173  | 0.00E+00  | 0.00E+00  | Lipoprotein lipase; similar with LIPL_CAVPO                   |
| Px001527.1 | 2.7935  | 7.50E-09  | 3.13E-08  | Lipase 1; similar with LIP1_DROME                             |
| Px017996.1 | 2.7512  | 1.00E-177 | 2.87E-176 | Acetylcholinesterase; similar with ACES_HUMAN                 |
| Px000089.1 | 2.6887  | 2.89E-87  | 4.95E-86  | Acetylcholinesterase; similar with ACES_FELCA                 |

|            |         |           |           |                                                                  |
|------------|---------|-----------|-----------|------------------------------------------------------------------|
| Px002735.1 | 2.6010  | 1.66E-257 | 6.15E-256 | Esterase FE4; similar with ESTF_MYZPE                            |
| Px005193.2 | 2.5958  | 2.33E-141 | 5.61E-140 | Pancreatic lipase-related protein 2; similar with LIPR2_MYOCO    |
| Px009691.1 | 2.5676  | 5.36E-19  | 3.56E-18  | Lipase 1; similar with LIP1_DROME                                |
| Px006345.1 | 2.5102  | 0.00E+00  | 0.00E+00  | Pancreatic lipase-related protein 2; similar with LIPR2_MYOCO    |
| Px011049.1 | 2.5090  | 4.88E-35  | 4.62E-34  | Acetylcholinesterase; similar with ACES_FELCA                    |
| Px004750.1 | 2.4896  | 0.00E+00  | 0.00E+00  | Pancreatic lipase-related protein 2; similar with LIPR2_RAT      |
| Px002736.1 | 2.4868  | 0.00E+00  | 0.00E+00  | Venom carboxylesterase-6; similar with EST6_APIME                |
| Px001913.1 | 2.4737  | 1.20E-150 | 3.03E-149 | Gastric triacylglycerol lipase; similar with LIPG_RAT            |
| Px006430.1 | 2.4038  | 1.48E-302 | 6.22E-301 | Esterase FE4; similar with ESTF_MYZPE                            |
| Px011475.1 | 2.3683  | 0.00E+00  | 0.00E+00  | Lipase 3; similar with LIP3_DROME                                |
| Px004752.1 | 2.3527  | 0.00E+00  | 0.00E+00  | Pancreatic lipase-related protein 2; similar with LIPR2_BOVIN    |
| Px004753.1 | 2.3410  | 9.82E-208 | 3.12E-206 | Pancreatic lipase-related protein 2; similar with LIPR2_MYOCO    |
| Px006441.1 | 2.3113  | 0.00E+00  | 0.00E+00  | Lipase member H; similar with LIPH_RAT                           |
| Px005876.1 | 2.3107  | 8.18E-70  | 1.20E-68  | Patatin-like phospholipase domain-containing protein 2           |
| Px012592.1 | 2.2775  | 0.00E+00  | 0.00E+00  | Juvenile hormone esterase; similar with ESTJ_HELVI               |
| Px001456.1 | 2.2249  | 2.79E-169 | 7.74E-168 | Gastric triacylglycerol lipase; similar with LIPG_RAT            |
| Px002296.1 | 2.1474  | 1.41E-169 | 3.92E-168 | Pancreatic triacylglycerol lipase; similar with LIPP_HUMAN       |
| Px003649.1 | 2.1363  | 0.00E+00  | 0.00E+00  | Esterase FE4; similar with ESTF_MYZPE                            |
| Px002964.1 | 2.1362  | 2.49E-07  | 9.29E-07  | Putative uncharacterized protein; similar with E9H4D7_DAPPU      |
| Px003273.1 | 2.1129  | 6.40E-16  | 3.82E-15  | Pancreatic lipase-related protein 2; similar with LIPR2_CAVPO    |
| Px000744.1 | 2.0773  | 1.67E-04  | 4.72E-04  | Lipase member H-A; similar with LIPHA_XENLA                      |
| Px006440.1 | 2.0668  | 1.56E-48  | 1.81E-47  | Phospholipase A1 member A; similar with PLA1A_HUMAN              |
| Px004200.1 | 2.0610  | 1.11E-81  | 1.81E-80  | Putative phosphatidate phosphatase; similar with WUN_DROME       |
| Px012696.1 | 2.0159  | 2.21E-135 | 5.07E-134 | Lipase 3; similar with LIP3_DROME                                |
| Px000515.1 | 1.9774  | 1.03E-98  | 1.91E-97  | Esterase FE4; similar with ESTF_MYZPE                            |
| Px004751.1 | 1.9293  | 0.00E+00  | 0.00E+00  | Pancreatic triacylglycerol lipase; similar with LIPP_HUMAN       |
| Px016338.1 | 1.9089  | 9.52E-63  | 1.31E-61  | Lipase 1; similar with LIP1_DROME                                |
| Px011727.1 | 1.7734  | 6.73E-64  | 9.35E-63  | Protein GCY; similar with GCY_YEAST                              |
| Px002295.1 | 1.7684  | 0.00E+00  | 0.00E+00  | Pancreatic lipase-related protein 2; similar with LIPR2_BOVIN    |
| Px000123.1 | 1.7598  | 0.00E+00  | 0.00E+00  | Putative aldehyde dehydrogenase family 7 member A1 homolog       |
| Px010260.3 | 1.7301  | 6.29E-25  | 4.87E-24  | Alcohol dehydrogenase [NADP+] A; similar with A1A1A_DANRE        |
| Px011755.1 | 1.7284  | 1.92E-39  | 1.96E-38  | Antennal esterase CXE4; similar with D3GDL5_SPOLI                |
| Px011476.1 | 1.7230  | 8.10E-19  | 5.34E-18  | Lipase 3; similar with LIP3_DROME                                |
| Px003712.1 | 1.6490  | 1.05E-19  | 7.17E-19  | Acetylcholinesterase; similar with ACES_CULPI                    |
| Px017997.1 | 1.6216  | 3.59E-04  | 9.62E-04  | Esterase FE4; similar with ESTF_MYZPE                            |
| Px000132.1 | 1.5866  | 3.04E-79  | 4.87E-78  | FGGY carbohydrate kinase domain-containing protein               |
| Px007772.1 | 1.5076  | 2.80E-66  | 3.96E-65  | Esterase B1; similar with EST1_CULPI                             |
| Px016066.1 | 1.4923  | 1.12E-13  | 6.06E-13  | Lipase member M; similar with LIPM_MOUSE                         |
| Px011550.1 | 1.4749  | 3.05E-11  | 1.48E-10  | Glycerate kinase; similar with GLCTK_RAT                         |
| Px006720.1 | 1.4070  | 1.32E-07  | 5.02E-07  | Glycerol-3-phosphate acyltransferase 4; similar with GPAT4_PONAB |
| Px004571.1 | 1.3081  | 2.26E-185 | 6.68E-184 | Aldose reductase; similar with ALDR_BOVIN                        |
| Px001937.2 | 1.2673  | 3.55E-115 | 7.31E-114 | Phosphatidate phosphatase LPIN2; similar with LPIN2_MOUSE        |
| Px002733.2 | 1.2093  | 0.00E+00  | 0.00E+00  | Aldehyde dehydrogenase, dimeric NADP-preferring                  |
| Px000042.3 | 1.1085  | 4.45E-27  | 3.66E-26  | Alcohol dehydrogenase [NADP+]; similar with AK1A1_BOVIN          |
| Px016558.1 | 1.0773  | 3.20E-04  | 8.66E-04  | Putative glycerol kinase 5; similar with GLPK5_DANRE             |
| Px013239.1 | 1.0562  | 3.46E-07  | 1.28E-06  | Putative glycerol kinase 3; similar with GLPK3_HUMAN             |
| Px012098.2 | 1.0475  | 2.15E-05  | 6.71E-05  | Lipase member I; similar with LIPI_HUMAN                         |
| Px011757.1 | 1.0401  | 5.69E-11  | 2.72E-10  | Esterase FE4; similar with ESTF_MYZPE                            |
| Px015882.1 | 1.0071  | 2.32E-110 | 4.67E-109 | Alcohol dehydrogenase [NADP+] A; similar with A1A1A_DANRE        |
| Px012289.1 | -1.0288 | 3.16E-06  | 1.07E-05  | Liver carboxylesterase; similar with EST1_MESAU                  |
| Px004110.1 | -1.0281 | 8.36E-07  | 2.99E-06  | Aldose reductase; similar with ALDR_RABIT                        |

### Involved in fat digestion and absorption

|            |         |          |          |                                                            |
|------------|---------|----------|----------|------------------------------------------------------------|
| Px000644.1 | 12.4260 | 4.78E-37 | 4.70E-36 | Pancreatic triacylglycerol lipase; similar with LIPP_MOUSE |
|------------|---------|----------|----------|------------------------------------------------------------|



|            |         |           |           |                                                                     |
|------------|---------|-----------|-----------|---------------------------------------------------------------------|
| Px012560.1 | 10.5968 | 1.26E-07  | 4.83E-07  | Lipase member H-B; similar with LIPHB_XENLA                         |
| Px000948.1 | 4.2472  | 2.43E-05  | 7.55E-05  | Gastric triacylglycerol lipase; similar with LIPG_RAT               |
| Px012694.3 | 4.1304  | 9.29E-40  | 9.57E-39  | Lipase 1; similar with LIP1_DROME                                   |
| Px011791.1 | 4.1145  | 0.00E+00  | 0.00E+00  | Lipase member H; similar with LIPH_XENTR                            |
| Px012011.2 | 4.0620  | 0.00E+00  | 0.00E+00  | Pancreatic triacylglycerol lipase; similar with LIPP_MYOCO          |
| Px004815.1 | 3.9017  | 3.38E-20  | 2.32E-19  | Gut esterase 1; similar with EST1_CAEEL                             |
| Px007180.1 | 3.8846  | 2.52E-32  | 2.29E-31  | Juvenile hormone esterase; similar with ESTJ_HELVI                  |
| Px005805.1 | 3.8398  | 5.29E-43  | 5.67E-42  | Lipase 1; similar with LIP1_DROME                                   |
| Px008783.1 | 3.5367  | 1.08E-05  | 3.49E-05  | Long-chain fatty acid transport protein 1; similar with S27A1_MOUSE |
| Px009940.2 | 3.4221  | 6.33E-52  | 7.64E-51  | Acetylcholinesterase; similar with ACES_CULPI                       |
| Px003352.1 | 3.1927  | 1.50E-30  | 1.32E-29  | Venom carboxylesterase-6; similar with EST6_APIME                   |
| Px011683.2 | 2.9306  | 0.00E+00  | 0.00E+00  | Venom carboxylesterase-6; similar with EST6_APIME                   |
| Px008089.1 | 2.8762  | 0.00E+00  | 0.00E+00  | Pancreatic lipase-related protein 2; similar with LIPR2_CAVPO       |
| Px006190.1 | 2.8647  | 0.00E+00  | 0.00E+00  | Lipase member H-A; similar with LIPHA_XENLA                         |
| Px011788.2 | 2.8400  | 3.24E-222 | 1.09E-220 | Pancreatic lipase-related protein 2; similar with LIPR2_BOVIN       |
| Px017996.1 | 2.7512  | 1.00E-177 | 2.87E-176 | Acetylcholinesterase; similar with ACES_HUMAN                       |
| Px012537.1 | 2.7402  | 3.03E-04  | 8.22E-04  | Apolipoporphins; similar with APLP_LOCFMI                           |
| Px000089.1 | 2.6887  | 2.89E-87  | 4.95E-86  | Acetylcholinesterase; similar with ACES_FELCA                       |
| Px002735.1 | 2.6010  | 1.66E-257 | 6.15E-256 | Esterase FE4; similar with ESTF_MYZPE                               |
| Px005193.2 | 2.5958  | 2.33E-141 | 5.61E-140 | Pancreatic lipase-related protein 2; similar with LIPR2_MYOCO       |
| Px009691.1 | 2.5676  | 5.36E-19  | 3.56E-18  | Lipase 1; similar with LIP1_DROME                                   |
| Px005199.1 | 2.5327  | 1.44E-159 | 3.81E-158 | Long-chain fatty acid transport protein 4; similar with S27A4_MACFA |
| Px006345.1 | 2.5102  | 0.00E+00  | 0.00E+00  | Pancreatic lipase-related protein 2; similar with LIPR2_MYOCO       |
| Px011049.1 | 2.5090  | 4.88E-35  | 4.62E-34  | Acetylcholinesterase; similar with ACES_FELCA                       |
| Px004750.1 | 2.4896  | 0.00E+00  | 0.00E+00  | Pancreatic lipase-related protein 2; similar with LIPR2_RAT         |
| Px002736.1 | 2.4868  | 0.00E+00  | 0.00E+00  | Venom carboxylesterase-6; similar with EST6_APIME                   |
| Px013824.1 | 2.4844  | 6.34E-19  | 4.20E-18  | Sensory neuron membrane protein 1; similar with SNMP1_PEDHC         |
| Px006430.1 | 2.4038  | 1.48E-302 | 6.22E-301 | Esterase FE4; similar with ESTF_MYZPE                               |
| Px004752.1 | 2.3527  | 0.00E+00  | 0.00E+00  | Pancreatic lipase-related protein 2; similar with LIPR2_BOVIN       |
| Px004753.1 | 2.3410  | 9.82E-208 | 3.12E-206 | Pancreatic lipase-related protein 2; similar with LIPR2_MYOCO       |
| Px006441.1 | 2.3113  | 0.00E+00  | 0.00E+00  | Lipase member H; similar with LIPH_RAT                              |
| Px001337.1 | 2.2940  | 0.00E+00  | 0.00E+00  | Putative uncharacterized protein; similar with A9NYL2_PICSI         |
| Px012592.1 | 2.2775  | 0.00E+00  | 0.00E+00  | Juvenile hormone esterase; similar with ESTJ_HELVI                  |
| Px001456.1 | 2.2249  | 2.79E-169 | 7.74E-168 | Gastric triacylglycerol lipase; similar with LIPG_RAT               |
| Px002296.1 | 2.1474  | 1.41E-169 | 3.92E-168 | Pancreatic triacylglycerol lipase; similar with LIPP_HUMAN          |
| Px003649.1 | 2.1363  | 0.00E+00  | 0.00E+00  | Esterase FE4; similar with ESTF_MYZPE                               |
| Px003273.1 | 2.1129  | 6.40E-16  | 3.82E-15  | Pancreatic lipase-related protein 2; similar with LIPR2_CAVPO       |
| Px000744.1 | 2.0773  | 1.67E-04  | 4.72E-04  | Lipase member H-A; similar with LIPHA_XENLA                         |
| Px004200.1 | 2.0610  | 1.11E-81  | 1.81E-80  | Putative phosphatidate phosphatase; similar with WUN_DROME          |
| Px012696.1 | 2.0159  | 2.21E-135 | 5.07E-134 | Lipase 3; similar with LIP3_DROME                                   |
| Px000515.1 | 1.9774  | 1.03E-98  | 1.91E-97  | Esterase FE4; similar with ESTF_MYZPE                               |
| Px004751.1 | 1.9293  | 0.00E+00  | 0.00E+00  | Pancreatic triacylglycerol lipase; similar with LIPP_HUMAN          |
| Px008150.1 | 1.7972  | 2.12E-17  | 1.33E-16  | Scavenger receptor class B member 1; similar with SCRB1_PIG         |
| Px001510.4 | 1.7749  | 2.77E-85  | 4.66E-84  | Scavenger receptor class B member 1; similar with SCRB1_PIG         |
| Px002295.1 | 1.7684  | 0.00E+00  | 0.00E+00  | Pancreatic lipase-related protein 2; similar with LIPR2_BOVIN       |
| Px011335.1 | 1.7641  | 1.16E-13  | 6.27E-13  | Scavenger receptor class B member 1; similar with SCRB1_BOVIN       |
| Px012163.2 | 1.7447  | 5.09E-26  | 4.05E-25  | Protein croquemort; similar with CRQ_DROME                          |
| Px011755.1 | 1.7284  | 1.92E-39  | 1.96E-38  | Antennal esterase CXE4; similar with D3GDL5_SPOLI                   |
| Px003712.1 | 1.6490  | 1.05E-19  | 7.17E-19  | Acetylcholinesterase; similar with ACES_CULPI                       |
| Px017997.1 | 1.6216  | 3.59E-04  | 9.62E-04  | Esterase FE4; similar with ESTF_MYZPE                               |
| Px007772.1 | 1.5076  | 2.80E-66  | 3.96E-65  | Esterase B1; similar with EST1_CULPI                                |
| Px014702.1 | 1.5035  | 1.75E-04  | 4.92E-04  | Lysine-specific demethylase 8; similar with KDM8_RAT                |
| Px011529.1 | 1.4501  | 6.50E-117 | 1.35E-115 | Apolipoporphins; similar with APLP_LOCFMI                           |
| Px017838.1 | 1.3328  | 7.63E-25  | 5.89E-24  | ATP-binding cassette sub-family A member 12                         |

|            |         |          |          |                                                                     |
|------------|---------|----------|----------|---------------------------------------------------------------------|
| Px016733.1 | 1.2758  | 1.82E-09 | 7.92E-09 | Acyl-CoA synthetase family member 3, mitochondrial                  |
| Px010271.1 | 1.2456  | 5.38E-14 | 2.96E-13 | 2-acylglycerol O-acyltransferase 1; similar with MOGT1_XENTR        |
| Px004131.5 | 1.1474  | 6.20E-26 | 4.92E-25 | Calcium-independent phospholipase A2-gamma                          |
| Px008080.1 | 1.0773  | 1.70E-05 | 5.37E-05 | Lysosome membrane protein 2; similar with SCRB2_HUMAN               |
| Px012098.2 | 1.0475  | 2.15E-05 | 6.71E-05 | Lipase member I; similar with LIPI_HUMAN                            |
| Px005198.1 | 1.0445  | 2.21E-21 | 1.58E-20 | Long-chain fatty acid transport protein 4; similar with S27A4_MACFA |
| Px011757.1 | 1.0401  | 5.69E-11 | 2.72E-10 | Esterase FE4; similar with ESTF_MYZPE                               |
| Px004270.2 | 1.0203  | 2.08E-14 | 1.16E-13 | Microsomal triglyceride transfer protein large subunit              |
| Px012289.1 | -1.0288 | 3.16E-06 | 1.07E-05 | Liver carboxylesterase; similar with EST1_MESAU                     |

### Involved in amoebiasis

|            |         |           |           |                                                                                |
|------------|---------|-----------|-----------|--------------------------------------------------------------------------------|
| Px005278.1 | 11.8601 | 5.93E-18  | 3.78E-17  | Unknown functio                                                                |
| Px005318.1 | 11.3994 | 8.15E-10  | 3.63E-09  | Cuticle protein 19; similar with CU19_LOCFMI                                   |
| Px008374.1 | 10.7904 | 2.99E-08  | 1.19E-07  | Phosphatidylinositol-4,5-bisphosphate 3-kinase catalytic subunit delta isoform |
| Px012733.3 | 10.3612 | 1.64E-14  | 9.22E-14  | Putative uncharacterized protein; similar with D6W9U7_TRICA                    |
| Px009397.1 | 10.2656 | 1.26E-07  | 4.83E-07  | Translation initiation factor IF-2; similar with IF2_CHLPD                     |
| Px003372.1 | 9.1648  | 8.30E-05  | 2.43E-04  | Putative uncharacterized protein; similar with Q16FD0_AEDAE                    |
| Px008029.1 | 9.1359  | 8.30E-05  | 2.43E-04  | cAMP-dependent protein kinase catalytic subunit alpha                          |
| Px001530.1 | 8.7932  | 5.30E-259 | 1.98E-257 | Neurofilament heavy polypeptide; similar with NFH_MOUSE                        |
| Px004419.1 | 7.3760  | 0.00E+00  | 0.00E+00  | Putative uncharacterized protein GLEAN_08369                                   |
| Px017104.1 | 6.1858  | 1.57E-99  | 2.94E-98  | Neurofilament heavy polypeptide; similar with NFH_MOUSE                        |
| Px004755.2 | 6.1713  | 0.00E+00  | 0.00E+00  | Putative uncharacterized protein; similar with D6W7K2_TRICA                    |
| Px000337.1 | 6.0185  | 2.92E-157 | 7.59E-156 | Osiris 19; similar with B6DXA8_BOMMO                                           |
| Px012644.1 | 5.1718  | 5.01E-218 | 1.66E-216 | Filamentous hemagglutinin; similar with FHAB_BORPE                             |
| Px003684.1 | 4.9599  | 1.89E-62  | 2.57E-61  | Cuticle protein 19; similar with CU19_LOCFMI                                   |
| Px001327.2 | 4.7211  | 1.68E-26  | 1.36E-25  | Unknown functio                                                                |
| Px016161.1 | 4.6340  | 0.00E+00  | 0.00E+00  | Neurofilament heavy polypeptide; similar with NFH_RAT                          |
| Px007897.1 | 4.2538  | 1.12E-103 | 2.16E-102 | Peritrophic matrix insect intestinal mucin; similar with Q8ISS2_PLUXY          |
| Px013975.1 | 4.1505  | 1.23E-71  | 1.83E-70  | Cuticlin-1; similar with E2BP69_9HYME                                          |
| Px005436.1 | 3.8846  | 3.51E-04  | 9.44E-04  | Protein yellow; similar with YELL_DROSU                                        |
| Px001082.1 | 3.7444  | 0.00E+00  | 0.00E+00  | Unknown functio                                                                |
| Px008031.1 | 3.6920  | 1.06E-11  | 5.27E-11  | cAMP-dependent protein kinase catalytic subunit alpha                          |
| Px002960.1 | 3.6078  | 1.03E-44  | 1.13E-43  | Transforming growth factor-beta-induced protein ig-h3                          |
| Px013635.1 | 3.5312  | 9.71E-216 | 3.19E-214 | Extracellular domains-containing protein CG31004                               |
| Px007895.2 | 3.4975  | 0.00E+00  | 0.00E+00  | Peritrophic matrix insect intestinal mucin; similar with Q8ISS2_PLUXY          |
| Px005969.1 | 3.4592  | 0.00E+00  | 0.00E+00  | Apolipoprotein D; similar with APOD_MACFA                                      |
| Px002615.1 | 3.4179  | 7.59E-94  | 1.36E-92  | C-type lectin, galactose-binding (AGAP010196-PA)                               |
| Px000651.1 | 3.3574  | 8.65E-121 | 1.85E-119 | Extracellular domains-containing protein CG31004                               |
| Px000745.1 | 3.3391  | 1.06E-92  | 1.88E-91  | Tenascin-X; similar with TENX_HUMAN                                            |
| Px001443.1 | 3.2620  | 0.00E+00  | 0.00E+00  | L-ascorbate oxidase; similar with ASO_CUCPM                                    |
| Px006951.2 | 3.2472  | 4.09E-08  | 1.62E-07  | Putative uncharacterized protein; similar with D6WTK7_TRICA                    |
| Px013918.1 | 3.2126  | 0.00E+00  | 0.00E+00  | Putative uncharacterized protein; similar with B0XCG6_CULQU                    |
| Px007274.1 | 3.2065  | 2.52E-47  | 2.88E-46  | Serpin B9; similar with SPB9_HUMAN                                             |
| Px010970.1 | 3.1720  | 7.67E-57  | 9.77E-56  | Cuticle protein; similar with CU01_ANOGA                                       |
| Px001081.1 | 3.1539  | 0.00E+00  | 0.00E+00  | Unknown functio                                                                |
| Px009152.1 | 3.1248  | 6.67E-86  | 1.13E-84  | Innexin inx7; similar with INX7_DROME                                          |
| Px003835.1 | 3.0608  | 1.01E-94  | 1.81E-93  | Putative uncharacterized protein; similar with B0WNP5_CULQU                    |
| Px005321.1 | 3.0407  | 2.97E-08  | 1.18E-07  | Cuticle protein 19; similar with CU19_LOCFMI                                   |
| Px005323.1 | 2.9253  | 4.27E-26  | 3.40E-25  | Cuticle protein 19; similar with CU19_LOCFMI                                   |
| Px009987.1 | 2.8978  | 1.47E-38  | 1.48E-37  | Caspase-1; similar with CASP1_DROME                                            |
| Px008604.1 | 2.8677  | 2.19E-157 | 5.71E-156 | AGAP011476-PA; similar with Q7Q343_ANOGA                                       |
| Px008030.1 | 2.8370  | 3.71E-26  | 2.97E-25  | cAMP-dependent protein kinase catalytic subunit                                |
| Px006536.1 | 2.8353  | 0.00E+00  | 0.00E+00  | HMG176; similar with Q0MTA5_HELAM                                              |
| Px005322.1 | 2.8116  | 0.00E+00  | 0.00E+00  | Cuticle protein 19; similar with CU19_LOCFMI                                   |

|            |        |           |           |                                                             |
|------------|--------|-----------|-----------|-------------------------------------------------------------|
| Px009784.1 | 2.6561 | 0.00E+00  | 0.00E+00  | Ribosome-binding protein 1; similar with RRBP1_HUMAN        |
| Px009883.1 | 2.6507 | 1.03E-20  | 7.20E-20  | Putative uncharacterized protein GLEAN_08340                |
| Px003497.1 | 2.6461 | 4.06E-15  | 2.34E-14  | Putative uncharacterized protein; similar with E9J4L9_SOLIN |
| Px001080.1 | 2.6021 | 0.00E+00  | 0.00E+00  | Unknown functio                                             |
| Px001671.1 | 2.5627 | 1.09E-09  | 4.81E-09  | Putative cuticle protein; similar with C0H6D6_BOMMO         |
| Px014252.1 | 2.4415 | 3.67E-69  | 5.34E-68  | Putative uncharacterized protein; similar with D6WG20_TRICA |
| Px010337.1 | 2.3427 | 6.05E-128 | 1.34E-126 | Cuticular protein CPR77; similar with B2DBI2_9NEOP          |
| Px015898.1 | 2.3215 | 0.00E+00  | 0.00E+00  | Putative farnesoic acid O-methyl transferase                |
| Px001077.1 | 2.3052 | 0.00E+00  | 0.00E+00  | Unknown functio                                             |
| Px002650.1 | 2.2907 | 5.34E-43  | 5.71E-42  | Chitin binding protein; similar with B0WJ01_CULQU           |
| Px002795.1 | 2.2574 | 1.02E-55  | 1.28E-54  | Laccase-4; similar with LAC4_TRAVE                          |
| Px003776.1 | 2.1246 | 9.72E-09  | 4.02E-08  | TBC1 domain family member 30; similar with TBC30_XENTR      |
| Px014841.1 | 2.1217 | 5.76E-83  | 9.49E-82  | Unknown functio                                             |
| Px015340.1 | 2.1102 | 2.20E-89  | 3.82E-88  | Putative uncharacterized protein; similar with D6WEC2_TRICA |
| Px002424.1 | 1.9989 | 4.37E-161 | 1.16E-159 | Serpin B3; similar with SPB3_HUMAN                          |
| Px012786.1 | 1.9892 | 0.00E+00  | 0.00E+00  | GH11122; similar with B4JCY6_DROGR                          |
| Px001076.1 | 1.9838 | 0.00E+00  | 0.00E+00  | Fibrohexamerin; similar with SI25_GALME                     |
| Px009301.1 | 1.9550 | 1.51E-125 | 3.31E-124 | Beta-1,3-glucan-binding protein; similar with BGBP_BOMMO    |
| Px015087.3 | 1.8241 | 0.00E+00  | 0.00E+00  | Glia-derived nexin; similar with GDN_HUMAN                  |
| Px000622.1 | 1.8077 | 2.17E-08  | 8.71E-08  | Protein spaetzle; similar with E2CAB2_9HYME                 |
| Px011577.1 | 1.8036 | 1.23E-82  | 2.03E-81  | Plasminogen activator inhibitor 1; similar with PAI1_PIG    |
| Px008680.1 | 1.7601 | 5.23E-07  | 1.90E-06  | Putative dsRNase; similar with B7VCC3_SPOLI                 |
| Px015090.1 | 1.7115 | 0.00E+00  | 0.00E+00  | Serpin B6; similar with SPB6_HUMAN                          |
| Px004235.2 | 1.7053 | 1.90E-19  | 1.28E-18  | Putative uncharacterized protein; similar with Q178N6_AEDAE |
| Px015730.1 | 1.7021 | 0.00E+00  | 0.00E+00  | Apolipoporphins; similar with APLP_MANSE                    |
| Px017059.1 | 1.6853 | 1.12E-190 | 3.37E-189 | Serpin B6; similar with SPB6_HUMAN                          |
| Px012136.3 | 1.6501 | 2.67E-51  | 3.20E-50  | Transferrin; similar with TRF_BLADI                         |
| Px001047.1 | 1.6266 | 1.35E-135 | 3.11E-134 | Heat shock protein 67B2; similar with HS6B_DROME            |
| Px003251.1 | 1.6237 | 1.02E-19  | 6.98E-19  | Putative cuticle protein; similar with C0H6E8_BOMMO         |
| Px002015.1 | 1.6107 | 7.78E-06  | 2.55E-05  | AGAP008123-PA; similar with Q7Q401_ANOGA                    |
| Px017058.1 | 1.5999 | 3.21E-34  | 3.01E-33  | Serpin B6; similar with SPB6_MOUSE                          |
| Px015729.1 | 1.5960 | 2.06E-13  | 1.10E-12  | Vinculin; similar with VINC_DROME                           |
| Px007271.1 | 1.5855 | 0.00E+00  | 0.00E+00  | Serpin B9; similar with SPB9_HUMAN                          |
| Px007272.1 | 1.5808 | 3.47E-77  | 5.48E-76  | Leukocyte elastase inhibitor; similar with ILEU_BOVIN       |
| Px001494.2 | 1.5662 | 0.00E+00  | 0.00E+00  | Alaserpin; similar with SERA_MANSE                          |
| Px013987.1 | 1.5512 | 3.40E-05  | 1.04E-04  | Putative uncharacterized transposon-derived protein F52C9.6 |
| Px002809.2 | 1.5031 | 7.52E-18  | 4.78E-17  | WD repeat domain phosphoinositide-interacting protein 4     |
| Px011646.1 | 1.4885 | 1.68E-10  | 7.79E-10  | GA10261; similar with Q29B54_DROPS                          |
| Px010627.1 | 1.4167 | 1.53E-153 | 3.89E-152 | Wing disc-specific protein; similar with Q8WPH2_BOMMO       |
| Px011466.1 | 1.3882 | 2.99E-14  | 1.66E-13  | Putative uncharacterized protein; similar with F0Y4G7_9STRA |
| Px013252.1 | 1.3766 | 0.00E+00  | 0.00E+00  | Calexcitin-2; similar with CEX2_CAEEL                       |
| Px015383.1 | 1.3727 | 8.33E-05  | 2.43E-04  | Latrophilin-like receptor; similar with D7EJP1_TRICA        |
| Px011737.1 | 1.3544 | 0.00E+00  | 0.00E+00  | Neurofilament heavy polypeptide; similar with NFH_MOUSE     |
| Px015923.1 | 1.3371 | 5.16E-07  | 1.88E-06  | OTU domain-containing protein 1; similar with OTUD1_HUMAN   |
| Px015089.1 | 1.3270 | 0.00E+00  | 0.00E+00  | Serpin B9; similar with SPB9_HUMAN                          |
| Px007816.1 | 1.2997 | 3.29E-04  | 8.88E-04  | AGAP010146-PA; similar with Q7Q0V0_ANOGA                    |
| Px003823.1 | 1.2692 | 4.31E-175 | 1.22E-173 | Plasminogen activator inhibitor 1; similar with PAI1_MUSVI  |
| Px013298.1 | 1.2577 | 3.36E-51  | 4.02E-50  | Serine proteinase-like protein; similar with Q1HPQ5_BOMMO   |
| Px008882.1 | 1.2542 | 1.19E-128 | 2.65E-127 | Unknown functio                                             |
| Px007273.1 | 1.2484 | 5.02E-34  | 4.68E-33  | Plasminogen activator inhibitor 1; similar with PAI1_HUMAN  |
| Px005957.1 | 1.2387 | 4.85E-06  | 1.62E-05  | LIM and SH3 domain protein Lasp; similar with LASP1_DROME   |
| Px015363.1 | 1.2365 | 5.17E-05  | 1.55E-04  | Slit homolog 3 protein; similar with SLIT3_MOUSE            |
| Px001430.1 | 1.1554 | 0.00E+00  | 0.00E+00  | Chitin deacetylase 1; similar with B2ZGH5_9NEOP             |
| Px013919.1 | 1.1490 | 0.00E+00  | 0.00E+00  | Collagen alpha-4(VI) chain; similar with CO6A4_MOUSE        |

|            |         |           |           |                                                                      |
|------------|---------|-----------|-----------|----------------------------------------------------------------------|
| Px015683.1 | 1.1458  | 8.18E-148 | 2.04E-146 | Protein yellow; similar with YELL_DROYA                              |
| Px002792.1 | 1.0827  | 4.51E-25  | 3.50E-24  | Unknown functio                                                      |
| Px008178.7 | 1.0520  | 8.69E-16  | 5.15E-15  | Vacuolar protein sorting-associated protein 13A                      |
| Px007399.1 | 1.0453  | 1.62E-14  | 9.12E-14  | Putative uncharacterized protein; similar with D6WDQ4_TRICA          |
| Px012264.1 | 1.0389  | 7.52E-138 | 1.76E-136 | Ejaculatory bulb-specific protein 3; similar with PEB3_DROME         |
| Px011876.1 | -8.7166 | 3.46E-04  | 9.33E-04  | Armadillo repeat-containing protein 2; similar with ARMC2_HUMAN      |
| Px008648.1 | -4.7573 | 9.33E-102 | 1.78E-100 | Larval/pupal rigid cuticle protein 66; similar with CU66_HYACE       |
| Px001065.1 | -3.9118 | 4.45E-217 | 1.47E-215 | Cuticle protein; similar with CU01_ANOGA                             |
| Px008500.1 | -3.8767 | 0.00E+00  | 0.00E+00  | Pupal cuticle protein; similar with CUPP_BOMMO                       |
| Px008653.1 | -3.3337 | 5.01E-149 | 1.26E-147 | Cuticle protein; similar with CU01_ANOGA                             |
| Px014536.1 | -2.9107 | 4.25E-133 | 9.63E-132 | Unknown functio                                                      |
| Px001066.1 | -2.8804 | 7.21E-117 | 1.50E-115 | Cuticle protein; similar with CU01_ANOGA                             |
| Px016485.1 | -2.7098 | 3.20E-167 | 8.79E-166 | Pupal cuticle protein; similar with CUPP_BOMMO                       |
| Px008652.2 | -2.6586 | 0.00E+00  | 0.00E+00  | Cuticle protein; similar with CU01_ANOGA                             |
| Px007290.1 | -2.5885 | 0.00E+00  | 0.00E+00  | Cuticle protein; similar with CU01_ANOGA                             |
| Px003252.2 | -2.5383 | 0.00E+00  | 0.00E+00  | Larval cuticle protein LCP-30; similar with CU30_BOMMO               |
| Px003249.1 | -2.5279 | 0.00E+00  | 0.00E+00  | Larval cuticle protein LCP-22; similar with CU22_BOMMO               |
| Px008651.1 | -2.3378 | 2.32E-17  | 1.45E-16  | Cuticle protein; similar with CU01_ANOGA                             |
| Px001064.1 | -2.2939 | 0.00E+00  | 0.00E+00  | Pupal cuticle protein Edg-84A; similar with CUP8_DROME               |
| Px014265.1 | -2.2155 | 7.66E-13  | 4.01E-12  | Unknown functio                                                      |
| Px014262.1 | -2.1613 | 8.02E-226 | 2.76E-224 | Putative cuticle protein; similar with C0H6H1_BOMMO                  |
| Px008650.1 | -2.1060 | 0.00E+00  | 0.00E+00  | Cuticle protein; similar with CU01_ANOGA                             |
| Px005288.1 | -2.0903 | 2.09E-66  | 2.97E-65  | Putative cuticle protein; similar with Q9U504_MANSE                  |
| Px014261.1 | -1.7691 | 0.00E+00  | 0.00E+00  | Putative cuticle protein; similar with C0H6H2_BOMMO                  |
| Px003250.1 | -1.6890 | 8.64E-94  | 1.54E-92  | Larval cuticle protein LCP-30; similar with CU30_BOMMO               |
| Px001656.1 | -1.6562 | 2.78E-23  | 2.07E-22  | Vitellogenin; similar with VIT_BOMMO                                 |
| Px013556.1 | -1.6442 | 0.00E+00  | 0.00E+00  | Flexible cuticle protein 12; similar with CU12_HYACE                 |
| Px013555.1 | -1.6367 | 0.00E+00  | 0.00E+00  | Flexible cuticle protein 12; similar with CU12_HYACE                 |
| Px008655.1 | -1.5915 | 6.52E-163 | 1.74E-161 | Cuticle protein; similar with CU01_ANOGA                             |
| Px002974.3 | -1.5617 | 0.00E+00  | 0.00E+00  | Myofilin variant A; similar with C3UZ70_BOMMA                        |
| Px014245.1 | -1.5602 | 2.08E-05  | 6.52E-05  | Unknown functio                                                      |
| Px000548.1 | -1.4120 | 0.00E+00  | 0.00E+00  | Alpha-actinin, sarcomeric; similar with ACTN_DROME                   |
| Px008654.1 | -1.3873 | 7.28E-49  | 8.45E-48  | Pupal cuticle protein Edg-84A; similar with CUP8_DROME               |
| Px002640.1 | -1.2858 | 0.00E+00  | 0.00E+00  | Alpha-actinin, sarcomeric; similar with ACTN_DROME                   |
| Px001199.1 | -1.2619 | 0.00E+00  | 0.00E+00  | Fibroin light chain; similar with FIBL_GALME                         |
| Px003254.3 | -1.2597 | 0.00E+00  | 0.00E+00  | Larval cuticle protein LCP-17; similar with CU17_BOMMO               |
| Px014247.3 | -1.2526 | 0.00E+00  | 0.00E+00  | Cuticular protein CPR77; similar with B2DBI2_9NEOP                   |
| Px011301.2 | -1.1671 | 2.31E-91  | 4.07E-90  | Putative uncharacterized protein; similar with D6WH87_TRICA          |
| Px014818.1 | -1.0682 | 2.80E-04  | 7.64E-04  | Ecdysteroid 22-phosphate; similar with Q0PCR8_BOMMO                  |
| Px003245.1 | -1.0530 | 8.39E-301 | 3.51E-299 | Larval cuticle protein LCP-22; similar with CU22_BOMMO               |
| Px003255.1 | -1.0353 | 0.00E+00  | 0.00E+00  | Larval cuticle protein LCP-17; similar with CU17_BOMMO               |
| Px010466.1 | -1.0231 | 0.00E+00  | 0.00E+00  | Repetitive proline-rich cell wall protein 2; similar with PRP2_MEDTR |
| Px013606.1 | -1.0228 | 0.00E+00  | 0.00E+00  | Unknown functio                                                      |

### Involved in vibrio cholerae infection

|            |         |           |           |                                                             |
|------------|---------|-----------|-----------|-------------------------------------------------------------|
| Px005278.1 | 11.8601 | 5.93E-18  | 3.78E-17  | Unknown functio                                             |
| Px005318.1 | 11.3994 | 8.15E-10  | 3.63E-09  | Cuticle protein 19; similar with CU19_LOCFI                 |
| Px012733.3 | 10.3612 | 1.64E-14  | 9.22E-14  | Putative uncharacterized protein; similar with D6W9U7_TRICA |
| Px009397.1 | 10.2656 | 1.26E-07  | 4.83E-07  | Translation initiation factor IF-2; similar with IF2_CHLPD  |
| Px003372.1 | 9.1648  | 8.30E-05  | 2.43E-04  | Putative uncharacterized protein; similar with Q16FD0_AEDAE |
| Px008029.1 | 9.1359  | 8.30E-05  | 2.43E-04  | cAMP-dependent protein kinase catalytic subunit alpha       |
| Px001530.1 | 8.7932  | 5.30E-259 | 1.98E-257 | Neurofilament heavy polypeptide; similar with NFH_MOUSE     |
| Px004419.1 | 7.3760  | 0.00E+00  | 0.00E+00  | Putative uncharacterized protein GLEAN_08369                |
| Px017104.1 | 6.1858  | 1.57E-99  | 2.94E-98  | Neurofilament heavy polypeptide; similar with NFH_MOUSE     |

|            |        |           |           |                                                                       |
|------------|--------|-----------|-----------|-----------------------------------------------------------------------|
| Px004755.2 | 6.1713 | 0.00E+00  | 0.00E+00  | Putative uncharacterized protein; similar with D6W7K2_TRICA           |
| Px000337.1 | 6.0185 | 2.92E-157 | 7.59E-156 | Osiris 19; similar with B6DXA8_BOMMO                                  |
| Px012644.1 | 5.1718 | 5.01E-218 | 1.66E-216 | Filamentous hemagglutinin; similar with FHAB_BORPE                    |
| Px003684.1 | 4.9599 | 1.89E-62  | 2.57E-61  | Cuticle protein 19; similar with CU19_LOCFMI                          |
| Px001327.2 | 4.7211 | 1.68E-26  | 1.36E-25  | Unknown functio                                                       |
| Px016161.1 | 4.6340 | 0.00E+00  | 0.00E+00  | Neurofilament heavy polypeptide; similar with NFH_RAT                 |
| Px007897.1 | 4.2538 | 1.12E-103 | 2.16E-102 | Peritrophic matrix insect intestinal mucin; similar with Q8ISS2_PLUXY |
| Px013975.1 | 4.1505 | 1.23E-71  | 1.83E-70  | Cuticlin-1; similar with E2BP69_9HYME                                 |
| Px005436.1 | 3.8846 | 3.51E-04  | 9.44E-04  | Protein yellow; similar with YELL_DR0SU                               |
| Px001082.1 | 3.7444 | 0.00E+00  | 0.00E+00  | Unknown functio                                                       |
| Px008031.1 | 3.6920 | 1.06E-11  | 5.27E-11  | cAMP-dependent protein kinase catalytic subunit alpha                 |
| Px002960.1 | 3.6078 | 1.03E-44  | 1.13E-43  | Transforming growth factor-beta-induced protein ig-h3                 |
| Px013635.1 | 3.5312 | 9.71E-216 | 3.19E-214 | Extracellular domains-containing protein CG31004                      |
| Px007895.2 | 3.4975 | 0.00E+00  | 0.00E+00  | Peritrophic matrix insect intestinal mucin; similar with Q8ISS2_PLUXY |
| Px005969.1 | 3.4592 | 0.00E+00  | 0.00E+00  | Apolipoprotein D; similar with APOD_MACFA                             |
| Px002615.1 | 3.4179 | 7.59E-94  | 1.36E-92  | C-type lectin, galactose-binding (AGAP010196-PA)                      |
| Px000651.1 | 3.3574 | 8.65E-121 | 1.85E-119 | Extracellular domains-containing protein CG31004                      |
| Px001443.1 | 3.2620 | 0.00E+00  | 0.00E+00  | L-ascorbate oxidase; similar with ASO_CUCPM                           |
| Px006951.2 | 3.2472 | 4.09E-08  | 1.62E-07  | Putative uncharacterized protein; similar with D6WTK7_TRICA           |
| Px013918.1 | 3.2126 | 0.00E+00  | 0.00E+00  | Putative uncharacterized protein; similar with B0XCG6_CULQU           |
| Px010970.1 | 3.1720 | 7.67E-57  | 9.77E-56  | Cuticle protein; similar with CU01_ANOGA                              |
| Px001081.1 | 3.1539 | 0.00E+00  | 0.00E+00  | Unknown functio                                                       |
| Px009152.1 | 3.1248 | 6.67E-86  | 1.13E-84  | Innexin inx7; similar with INX7_DROME                                 |
| Px009080.1 | 3.0773 | 6.20E-26  | 4.92E-25  | Vacuolar ATP synthase subunit S1, putative                            |
| Px003835.1 | 3.0608 | 1.01E-94  | 1.81E-93  | Putative uncharacterized protein; similar with B0WNP5_CULQU           |
| Px005321.1 | 3.0407 | 2.97E-08  | 1.18E-07  | Cuticle protein 19; similar with CU19_LOCFMI                          |
| Px005323.1 | 2.9253 | 4.27E-26  | 3.40E-25  | Cuticle protein 19; similar with CU19_LOCFMI                          |
| Px008604.1 | 2.8677 | 2.19E-157 | 5.71E-156 | AGAP011476-PA; similar with Q7Q343_ANOGA                              |
| Px008030.1 | 2.8370 | 3.71E-26  | 2.97E-25  | cAMP-dependent protein kinase catalytic subunit                       |
| Px006536.1 | 2.8353 | 0.00E+00  | 0.00E+00  | HMG176; similar with Q0MTA5_HELAM                                     |
| Px005322.1 | 2.8116 | 0.00E+00  | 0.00E+00  | Cuticle protein 19; similar with CU19_LOCFMI                          |
| Px009784.1 | 2.6561 | 0.00E+00  | 0.00E+00  | Ribosome-binding protein 1; similar with RRBPI_HUMAN                  |
| Px009883.1 | 2.6507 | 1.03E-20  | 7.20E-20  | Putative uncharacterized protein GLEAN_08340                          |
| Px003497.1 | 2.6461 | 4.06E-15  | 2.34E-14  | Putative uncharacterized protein; similar with E9J4L9_SOLIN           |
| Px001080.1 | 2.6021 | 0.00E+00  | 0.00E+00  | Unknown functio                                                       |
| Px001671.1 | 2.5627 | 1.09E-09  | 4.81E-09  | Putative cuticle protein; similar with C0H6D6_BOMMO                   |
| Px014252.1 | 2.4415 | 3.67E-69  | 5.34E-68  | Putative uncharacterized protein; similar with D6WG20_TRICA           |
| Px010337.1 | 2.3427 | 6.05E-128 | 1.34E-126 | Cuticular protein CPR77; similar with B2DBI2_9NEOP                    |
| Px015898.1 | 2.3215 | 0.00E+00  | 0.00E+00  | Putative farnesoic acid O-methyl transferase                          |
| Px001077.1 | 2.3052 | 0.00E+00  | 0.00E+00  | Unknown functio                                                       |
| Px002650.1 | 2.2907 | 5.34E-43  | 5.71E-42  | Chitin binding protein; similar with B0WJ01_CULQU                     |
| Px002795.1 | 2.2574 | 1.02E-55  | 1.28E-54  | Laccase-4; similar with LAC4_TRAVE                                    |
| Px007927.1 | 2.2154 | 4.79E-60  | 6.34E-59  | V-type proton ATPase subunit G; similar with VATG_MANSE               |
| Px003776.1 | 2.1246 | 9.72E-09  | 4.02E-08  | TBC1 domain family member 30; similar with TBC30_XENTR                |
| Px014841.1 | 2.1217 | 5.76E-83  | 9.49E-82  | Unknown functio                                                       |
| Px015340.1 | 2.1102 | 2.20E-89  | 3.82E-88  | Putative uncharacterized protein; similar with D6WEC2_TRICA           |
| Px012786.1 | 1.9892 | 0.00E+00  | 0.00E+00  | GH11122; similar with B4JCY6_DROGR                                    |
| Px001076.1 | 1.9838 | 0.00E+00  | 0.00E+00  | Fibrohexamerin; similar with SI25_GALME                               |
| Px009301.1 | 1.9550 | 1.51E-125 | 3.31E-124 | Beta-1,3-glucan-binding protein; similar with BGBP_BOMMO              |
| Px000622.1 | 1.8077 | 2.17E-08  | 8.71E-08  | Protein spaetzle; similar with E2CAB2_9HYME                           |
| Px008680.1 | 1.7601 | 5.23E-07  | 1.90E-06  | Putative dsRNase; similar with B7VCC3_SPOLI                           |
| Px004235.2 | 1.7053 | 1.90E-19  | 1.28E-18  | Putative uncharacterized protein; similar with Q178N6_AEDAE           |
| Px015730.1 | 1.7021 | 0.00E+00  | 0.00E+00  | Apolipoporphins; similar with APLP_MANSE                              |
| Px012136.3 | 1.6501 | 2.67E-51  | 3.20E-50  | Transferrin; similar with TRF_BLADI                                   |

|            |         |           |           |                                                                |
|------------|---------|-----------|-----------|----------------------------------------------------------------|
| Px001047.1 | 1.6266  | 1.35E-135 | 3.11E-134 | Heat shock protein 67B2; similar with HS6B_DROME               |
| Px002015.1 | 1.6107  | 7.78E-06  | 2.55E-05  | AGAP008123-PA; similar with Q7Q401_ANOGA                       |
| Px011646.1 | 1.4885  | 1.68E-10  | 7.79E-10  | GA10261; similar with Q29B54_DROPS                             |
| Px011466.1 | 1.3882  | 2.99E-14  | 1.66E-13  | Putative uncharacterized protein; similar with F0Y4G7_9STRA    |
| Px013252.1 | 1.3766  | 0.00E+00  | 0.00E+00  | Calexcitin-2; similar with CEX2_CAEEL                          |
| Px015383.1 | 1.3727  | 8.33E-05  | 2.43E-04  | Latrophilin-like receptor; similar with D7EJP1_TRICA           |
| Px015301.3 | 1.3558  | 5.98E-18  | 3.81E-17  | V-type proton ATPase subunit S1; similar with VAS1_MOUSE       |
| Px000146.1 | 1.3503  | 5.61E-05  | 1.68E-04  | Adenylate cyclase type 9; similar with ADCY9_HUMAN             |
| Px015923.1 | 1.3371  | 5.16E-07  | 1.88E-06  | OTU domain-containing protein 1; similar with OTUD1_HUMAN      |
| Px007816.1 | 1.2997  | 3.29E-04  | 8.88E-04  | AGAP010146-PA; similar with Q7Q0V0_ANOGA                       |
| Px013298.1 | 1.2577  | 3.36E-51  | 4.02E-50  | Serine proteinase-like protein; similar with Q1HPQ5_BOMMO      |
| Px005957.1 | 1.2387  | 4.85E-06  | 1.62E-05  | LIM and SH3 domain protein Lasp; similar with LASP1_DROME      |
| Px001430.1 | 1.1554  | 0.00E+00  | 0.00E+00  | Chitin deacetylase 1; similar with B2ZGH5_9NEOP                |
| Px015683.1 | 1.1458  | 8.18E-148 | 2.04E-146 | Protein yellow; similar with YELL_DROYA                        |
| Px008178.7 | 1.0520  | 8.69E-16  | 5.15E-15  | Vacuolar protein sorting-associated protein 13A                |
| Px007399.1 | 1.0453  | 1.62E-14  | 9.12E-14  | Putative uncharacterized protein; similar with D6WDQ4_TRICA    |
| Px012264.1 | 1.0389  | 7.52E-138 | 1.76E-136 | Ejaculatory bulb-specific protein 3; similar with PEB3_DROME   |
| Px005056.1 | 1.0223  | 1.78E-132 | 4.01E-131 | V-type proton ATPase subunit e 2; similar with VA0E2_HUMAN     |
| Px008648.1 | -4.7573 | 9.33E-102 | 1.78E-100 | Larval/pupal rigid cuticle protein 66; similar with CU66_HYACE |
| Px001065.1 | -3.9118 | 4.45E-217 | 1.47E-215 | Cuticle protein; similar with CU01_ANOGA                       |
| Px008500.1 | -3.8767 | 0.00E+00  | 0.00E+00  | Pupal cuticle protein; similar with CUPP_BOMMO                 |
| Px003126.1 | -3.3822 | 3.42E-05  | 1.05E-04  | Adenylate cyclase type 3; similar with ADCY3_MOUSE             |
| Px008653.1 | -3.3337 | 5.01E-149 | 1.26E-147 | Cuticle protein; similar with CU01_ANOGA                       |
| Px014536.1 | -2.9107 | 4.25E-133 | 9.63E-132 | Unknown functio                                                |
| Px001066.1 | -2.8804 | 7.21E-117 | 1.50E-115 | Cuticle protein; similar with CU01_ANOGA                       |
| Px016485.1 | -2.7098 | 3.20E-167 | 8.79E-166 | Pupal cuticle protein; similar with CUPP_BOMMO                 |
| Px008652.2 | -2.6586 | 0.00E+00  | 0.00E+00  | Cuticle protein; similar with CU01_ANOGA                       |
| Px007290.1 | -2.5885 | 0.00E+00  | 0.00E+00  | Cuticle protein; similar with CU01_ANOGA                       |
| Px003252.2 | -2.5383 | 0.00E+00  | 0.00E+00  | Larval cuticle protein LCP-30; similar with CU30_BOMMO         |
| Px003249.1 | -2.5279 | 0.00E+00  | 0.00E+00  | Larval cuticle protein LCP-22; similar with CU22_BOMMO         |
| Px008651.1 | -2.3378 | 2.32E-17  | 1.45E-16  | Cuticle protein; similar with CU01_ANOGA                       |
| Px001064.1 | -2.2939 | 0.00E+00  | 0.00E+00  | Pupal cuticle protein Edg-84A; similar with CUP8_DROME         |
| Px014265.1 | -2.2155 | 7.66E-13  | 4.01E-12  | Unknown functio                                                |
| Px014262.1 | -2.1613 | 8.02E-226 | 2.76E-224 | Putative cuticle protein; similar with C0H6H1_BOMMO            |
| Px008650.1 | -2.1060 | 0.00E+00  | 0.00E+00  | Cuticle protein; similar with CU01_ANOGA                       |
| Px005288.1 | -2.0903 | 2.09E-66  | 2.97E-65  | Putative cuticle protein; similar with Q9U504_MANSE            |
| Px014261.1 | -1.7691 | 0.00E+00  | 0.00E+00  | Putative cuticle protein; similar with C0H6H2_BOMMO            |
| Px003250.1 | -1.6890 | 8.64E-94  | 1.54E-92  | Larval cuticle protein LCP-30; similar with CU30_BOMMO         |
| Px001656.1 | -1.6562 | 2.78E-23  | 2.07E-22  | Vitellogenin; similar with VIT_BOMMO                           |
| Px013556.1 | -1.6442 | 0.00E+00  | 0.00E+00  | Flexible cuticle protein 12; similar with CU12_HYACE           |
| Px013555.1 | -1.6367 | 0.00E+00  | 0.00E+00  | Flexible cuticle protein 12; similar with CU12_HYACE           |
| Px008655.1 | -1.5915 | 6.52E-163 | 1.74E-161 | Cuticle protein; similar with CU01_ANOGA                       |
| Px002974.3 | -1.5617 | 0.00E+00  | 0.00E+00  | Myofilin variant A; similar with C3UZ70_BOMMA                  |
| Px014245.1 | -1.5602 | 2.08E-05  | 6.52E-05  | Unknown functio                                                |
| Px013456.1 | -1.4780 | 9.11E-21  | 6.38E-20  | Actin, clone 211; similar with ACT2_ARTSX                      |
| Px008654.1 | -1.3873 | 7.28E-49  | 8.45E-48  | Pupal cuticle protein Edg-84A; similar with CUP8_DROME         |
| Px003840.1 | -1.3269 | 0.00E+00  | 0.00E+00  | Actin, muscle; similar with ACT_MANSE                          |
| Px001199.1 | -1.2619 | 0.00E+00  | 0.00E+00  | Fibroin light chain; similar with FIBL_GALME                   |
| Px003254.3 | -1.2597 | 0.00E+00  | 0.00E+00  | Larval cuticle protein LCP-17; similar with CU17_BOMMO         |
| Px014247.3 | -1.2526 | 0.00E+00  | 0.00E+00  | Cuticular protein CPR77; similar with B2DBI2_9NEOP             |
| Px011301.2 | -1.1671 | 2.31E-91  | 4.07E-90  | Putative uncharacterized protein; similar with D6WH87_TRICA    |
| Px000220.2 | -1.1220 | 7.78E-07  | 2.79E-06  | Bumetanide-sensitive sodium-(potassium)-chloride cotransporter |
| Px014818.1 | -1.0682 | 2.80E-04  | 7.64E-04  | Ecdysteroid 22-phosphate; similar with Q0PCR8_BOMMO            |
| Px003245.1 | -1.0530 | 8.39E-301 | 3.51E-299 | Larval cuticle protein LCP-22; similar with CU22_BOMMO         |

|            |         |          |          |                                                        |
|------------|---------|----------|----------|--------------------------------------------------------|
| Px003255.1 | -1.0353 | 0.00E+00 | 0.00E+00 | Larval cuticle protein LCP-17; similar with CU17_BOMMO |
| Px003808.1 | -1.0231 | 0.00E+00 | 0.00E+00 | Actin, muscle; similar with ACT_MANSE                  |
| Px010466.1 | -1.0231 | 0.00E+00 | 0.00E+00 | Repetitive proline-rich cell wall protein 2            |
| Px013606.1 | -1.0228 | 0.00E+00 | 0.00E+00 | Unknown functio                                        |

### Involved in steroid biosynthesis

|            |         |           |           |                                                       |
|------------|---------|-----------|-----------|-------------------------------------------------------|
| Px000948.1 | 4.2472  | 2.43E-05  | 7.55E-05  | Gastric triacylglycerol lipase; similar with LIPG_RAT |
| Px012694.3 | 4.1304  | 9.29E-40  | 9.57E-39  | Lipase 1; similar with LIP1_DROME                     |
| Px004815.1 | 3.9017  | 3.38E-20  | 2.32E-19  | Gut esterase 1; similar with EST1_CAEEL               |
| Px007180.1 | 3.8846  | 2.52E-32  | 2.29E-31  | Juvenile hormone esterase; similar with ESTJ_HELVI    |
| Px005805.1 | 3.8398  | 5.29E-43  | 5.67E-42  | Lipase 1; similar with LIP1_DROME                     |
| Px005804.1 | 3.4363  | 2.24E-142 | 5.42E-141 | Lipase 1; similar with LIP1_DROME                     |
| Px009940.2 | 3.4221  | 6.33E-52  | 7.64E-51  | Acetylcholinesterase; similar with ACES_CULPI         |
| Px011477.2 | 3.1975  | 0.00E+00  | 0.00E+00  | Lipase 1; similar with LIP1_DROME                     |
| Px003352.1 | 3.1927  | 1.50E-30  | 1.32E-29  | Venom carboxylesterase-6; similar with EST6_APIME     |
| Px000371.1 | 3.0476  | 0.00E+00  | 0.00E+00  | Lipase 1; similar with LIP1_DROME                     |
| Px012695.1 | 2.9423  | 3.93E-150 | 9.92E-149 | Lipase 1; similar with LIP1_DROME                     |
| Px011683.2 | 2.9306  | 0.00E+00  | 0.00E+00  | Venom carboxylesterase-6; similar with EST6_APIME     |
| Px001527.1 | 2.7935  | 7.50E-09  | 3.13E-08  | Lipase 1; similar with LIP1_DROME                     |
| Px017996.1 | 2.7512  | 1.00E-177 | 2.87E-176 | Acetylcholinesterase; similar with ACES_HUMAN         |
| Px000089.1 | 2.6887  | 2.89E-87  | 4.95E-86  | Acetylcholinesterase; similar with ACES_FELCA         |
| Px002735.1 | 2.6010  | 1.66E-257 | 6.15E-256 | Esterase FE4; similar with ESTF_MYZPE                 |
| Px003400.1 | 2.5938  | 6.18E-17  | 3.82E-16  | EF-hand calcium-binding domain-containing protein 1   |
| Px009691.1 | 2.5676  | 5.36E-19  | 3.56E-18  | Lipase 1; similar with LIP1_DROME                     |
| Px011049.1 | 2.5090  | 4.88E-35  | 4.62E-34  | Acetylcholinesterase; similar with ACES_FELCA         |
| Px002736.1 | 2.4868  | 0.00E+00  | 0.00E+00  | Venom carboxylesterase-6; similar with EST6_APIME     |
| Px001913.1 | 2.4737  | 1.20E-150 | 3.03E-149 | Gastric triacylglycerol lipase; similar with LIPG_RAT |
| Px006430.1 | 2.4038  | 1.48E-302 | 6.22E-301 | Esterase FE4; similar with ESTF_MYZPE                 |
| Px011475.1 | 2.3683  | 0.00E+00  | 0.00E+00  | Lipase 3; similar with LIP3_DROME                     |
| Px012592.1 | 2.2775  | 0.00E+00  | 0.00E+00  | Juvenile hormone esterase; similar with ESTJ_HELVI    |
| Px001456.1 | 2.2249  | 2.79E-169 | 7.74E-168 | Gastric triacylglycerol lipase; similar with LIPG_RAT |
| Px003649.1 | 2.1363  | 0.00E+00  | 0.00E+00  | Esterase FE4; similar with ESTF_MYZPE                 |
| Px012696.1 | 2.0159  | 2.21E-135 | 5.07E-134 | Lipase 3; similar with LIP3_DROME                     |
| Px000515.1 | 1.9774  | 1.03E-98  | 1.91E-97  | Esterase FE4; similar with ESTF_MYZPE                 |
| Px016338.1 | 1.9089  | 9.52E-63  | 1.31E-61  | Lipase 1; similar with LIP1_DROME                     |
| Px011755.1 | 1.7284  | 1.92E-39  | 1.96E-38  | Antennal esterase CXE4; similar with D3GDL5_SPOLI     |
| Px003712.1 | 1.6490  | 1.05E-19  | 7.17E-19  | Acetylcholinesterase; similar with ACES_CULPI         |
| Px017997.1 | 1.6216  | 3.59E-04  | 9.62E-04  | Esterase FE4; similar with ESTF_MYZPE                 |
| Px007772.1 | 1.5076  | 2.80E-66  | 3.96E-65  | Esterase B1; similar with EST1_CULPI                  |
| Px016066.1 | 1.4923  | 1.12E-13  | 6.06E-13  | Lipase member M; similar with LIPM_MOUSE              |
| Px011757.1 | 1.0401  | 5.69E-11  | 2.72E-10  | Esterase FE4; similar with ESTF_MYZPE                 |
| Px012289.1 | -1.0288 | 3.16E-06  | 1.07E-05  | Liver carboxylesterase; similar with EST1_MESAU       |

### Involved in complement and coagulation cascades

|            |         |           |           |                                                           |
|------------|---------|-----------|-----------|-----------------------------------------------------------|
| Px015905.1 | 13.4712 | 1.77E-71  | 2.63E-70  | Transmembrane protease serine 6; similar with TMPS6_MOUSE |
| Px003000.1 | 12.5364 | 2.28E-42  | 2.43E-41  | Transmembrane protease serine 6; similar with TMPS6_MOUSE |
| Px006453.1 | 10.3391 | 8.15E-10  | 3.63E-09  | Transmembrane protease serine 6; similar with TMPS6_MOUSE |
| Px006790.1 | 5.8207  | 8.90E-106 | 1.74E-104 | Hemocytin; similar with HMCT_BOMMO                        |
| Px007357.2 | 5.3379  | 0.00E+00  | 0.00E+00  | Serine proteinase stubble; similar with STUB_DROME        |
| Px016100.1 | 4.5930  | 1.02E-46  | 1.15E-45  | Coagulation factor IX; similar with FA9_RABIT             |
| Px016549.2 | 4.5691  | 2.48E-12  | 1.26E-11  | Glia-derived nexin; similar with GDN_MOUSE                |
| Px009539.1 | 4.4251  | 0.00E+00  | 0.00E+00  | Hemocytin; similar with HMCT_BOMMO                        |
| Px016053.1 | 4.2124  | 5.01E-59  | 6.53E-58  | Trypsin; similar with TRYP_PHACE                          |
| Px006789.3 | 3.3612  | 0.00E+00  | 0.00E+00  | Hemocytin; similar with HMCT_BOMMO                        |

|            |         |           |           |                                                              |
|------------|---------|-----------|-----------|--------------------------------------------------------------|
| Px004168.1 | 3.2472  | 2.59E-13  | 1.38E-12  | Plasma kallikrein; similar with KLKB1_HUMAN                  |
| Px001997.1 | 3.0350  | 2.53E-37  | 2.50E-36  | Carboxypeptidase B; similar with CBPB_ASTFL                  |
| Px007757.1 | 2.7947  | 2.34E-29  | 2.01E-28  | Putative trypsin Inhibitor like cysteine rich domain protein |
| Px018074.1 | 2.6056  | 3.91E-24  | 2.97E-23  | Chymotrypsin-like elastase family member 2A                  |
| Px000584.1 | 2.1984  | 3.86E-96  | 7.02E-95  | Coagulation factor X; similar with FA10_RAT                  |
| Px001833.1 | 2.0603  | 0.00E+00  | 0.00E+00  | Serine protease easter; similar with EAST_DROME              |
| Px004167.1 | 2.0469  | 1.15E-06  | 4.06E-06  | Plasma kallikrein; similar with KLKB1_MOUSE                  |
| Px011577.1 | 1.8036  | 1.23E-82  | 2.03E-81  | Plasminogen activator inhibitor 1; similar with PAI1_PIG     |
| Px012329.1 | 1.7693  | 5.39E-84  | 8.95E-83  | Serine protease persephone; similar with PSH_DROME           |
| Px009087.2 | 1.6281  | 1.83E-240 | 6.53E-239 | Coagulation factor XII; similar with FA12_CAVPO              |
| Px001556.1 | 1.6061  | 8.94E-117 | 1.85E-115 | Serine protease easter; similar with EAST_DROME              |
| Px007271.1 | 1.5855  | 0.00E+00  | 0.00E+00  | Serpin B9; similar with SPB9_HUMAN                           |
| Px003184.1 | 1.3818  | 6.82E-52  | 8.23E-51  | Unknown functio                                              |
| Px005947.1 | 1.3627  | 2.45E-06  | 8.39E-06  | Serine proteinase stubble; similar with STUB_DROME           |
| Px011101.1 | 1.3474  | 1.36E-56  | 1.73E-55  | Coagulation factor X; similar with FA10_RAT                  |
| Px006975.2 | 1.3342  | 0.00E+00  | 0.00E+00  | Serine protease gd; similar with GD_DROME                    |
| Px007273.1 | 1.2484  | 5.02E-34  | 4.68E-33  | Plasminogen activator inhibitor 1; similar with PAI1_HUMAN   |
| Px000103.2 | 1.2217  | 3.55E-133 | 8.06E-132 | Prothrombin; similar with THRB_MOUSE                         |
| Px014830.1 | 1.1646  | 9.91E-167 | 2.71E-165 | Tryptase; similar with TRYB1_MOUSE                           |
| Px003670.2 | 1.1636  | 0.00E+00  | 0.00E+00  | Serine protease easter; similar with EAST_DROME              |
| Px010253.1 | 1.1621  | 1.06E-107 | 2.11E-106 | Unknown functio                                              |
| Px016983.3 | 1.0379  | 6.64E-09  | 2.78E-08  | Serine proteinase stubble; similar with STUB_DROME           |
| Px005668.1 | -2.2447 | 8.13E-05  | 2.38E-04  | NGFI-A-binding protein homolog; similar with NAB_DROME       |
| Px013792.1 | -1.1047 | 6.26E-31  | 5.54E-30  | Thrombospondin type-1 domain-containing protein 7A           |

#### Involved in alpha-linolenic acid metabolism

|            |         |           |           |                                                               |
|------------|---------|-----------|-----------|---------------------------------------------------------------|
| Px012560.1 | 10.5968 | 1.26E-07  | 4.83E-07  | Lipase member H-B; similar with LIPHB_XENLA                   |
| Px004749.1 | 4.2513  | 0.00E+00  | 0.00E+00  | Lipoprotein lipase; similar with LIPL_CAVPO                   |
| Px000948.1 | 4.2472  | 2.43E-05  | 7.55E-05  | Gastric triacylglycerol lipase; similar with LIPG_RAT         |
| Px012694.3 | 4.1304  | 9.29E-40  | 9.57E-39  | Lipase 1; similar with LIP1_DROME                             |
| Px005805.1 | 3.8398  | 5.29E-43  | 5.67E-42  | Lipase 1; similar with LIP1_DROME                             |
| Px005804.1 | 3.4363  | 2.24E-142 | 5.42E-141 | Lipase 1; similar with LIP1_DROME                             |
| Px011477.2 | 3.1975  | 0.00E+00  | 0.00E+00  | Lipase 1; similar with LIP1_DROME                             |
| Px001526.1 | 3.1070  | 4.54E-37  | 4.47E-36  | Lipase 1; similar with LIP1_DROME                             |
| Px000371.1 | 3.0476  | 0.00E+00  | 0.00E+00  | Lipase 1; similar with LIP1_DROME                             |
| Px012695.1 | 2.9423  | 3.93E-150 | 9.92E-149 | Lipase 1; similar with LIP1_DROME                             |
| Px011788.2 | 2.8400  | 3.24E-222 | 1.09E-220 | Pancreatic lipase-related protein 2; similar with LIPR2_BOVIN |
| Px001527.1 | 2.7935  | 7.50E-09  | 3.13E-08  | Lipase 1; similar with LIP1_DROME                             |
| Px005193.2 | 2.5958  | 2.33E-141 | 5.61E-140 | Pancreatic lipase-related protein 2; similar with LIPR2_MYOCO |
| Px009691.1 | 2.5676  | 5.36E-19  | 3.56E-18  | Lipase 1; similar with LIP1_DROME                             |
| Px006345.1 | 2.5102  | 0.00E+00  | 0.00E+00  | Pancreatic lipase-related protein 2; similar with LIPR2_MYOCO |
| Px004750.1 | 2.4896  | 0.00E+00  | 0.00E+00  | Pancreatic lipase-related protein 2; similar with LIPR2_RAT   |
| Px001913.1 | 2.4737  | 1.20E-150 | 3.03E-149 | Gastric triacylglycerol lipase; similar with LIPG_RAT         |
| Px011475.1 | 2.3683  | 0.00E+00  | 0.00E+00  | Lipase 3; similar with LIP3_DROME                             |
| Px004752.1 | 2.3527  | 0.00E+00  | 0.00E+00  | Pancreatic lipase-related protein 2; similar with LIPR2_BOVIN |
| Px004753.1 | 2.3410  | 9.82E-208 | 3.12E-206 | Pancreatic lipase-related protein 2; similar with LIPR2_MYOCO |
| Px002296.1 | 2.1474  | 1.41E-169 | 3.92E-168 | Pancreatic triacylglycerol lipase; similar with LIPP_HUMAN    |
| Px003273.1 | 2.1129  | 6.40E-16  | 3.82E-15  | Pancreatic lipase-related protein 2; similar with LIPR2_CAVPO |
| Px006500.1 | 2.0492  | 9.92E-42  | 1.05E-40  | Peroxisomal acyl-coenzyme A oxidase 3                         |
| Px006763.1 | 2.0407  | 1.02E-05  | 3.30E-05  | Peroxisomal acyl-coenzyme A oxidase 3                         |
| Px012696.1 | 2.0159  | 2.21E-135 | 5.07E-134 | Lipase 3; similar with LIP3_DROME                             |
| Px004751.1 | 1.9293  | 0.00E+00  | 0.00E+00  | Pancreatic triacylglycerol lipase; similar with LIPP_HUMAN    |
| Px016338.1 | 1.9089  | 9.52E-63  | 1.31E-61  | Lipase 1; similar with LIP1_DROME                             |
| Px002295.1 | 1.7684  | 0.00E+00  | 0.00E+00  | Pancreatic lipase-related protein 2; similar with LIPR2_BOVIN |



|            |        |          |          |                                                                      |
|------------|--------|----------|----------|----------------------------------------------------------------------|
| Px011476.1 | 1.7230 | 8.10E-19 | 5.34E-18 | Lipase 3; similar with LIP3_DROME                                    |
| Px001531.1 | 1.5708 | 7.84E-60 | 1.04E-58 | Probable peroxisomal acyl-coenzyme A oxidase 1                       |
| Px007047.2 | 1.5134 | 9.55E-05 | 2.77E-04 | Probable peroxisomal acyl-coenzyme A oxidase 1                       |
| Px014702.1 | 1.5035 | 1.75E-04 | 4.92E-04 | Lysine-specific demethylase 8; similar with KDM8_RAT                 |
| Px016066.1 | 1.4923 | 1.12E-13 | 6.06E-13 | Lipase member M; similar with LIPM_MOUSE                             |
| Px004131.5 | 1.1474 | 6.20E-26 | 4.92E-25 | Calcium-independent phospholipase A2-gamma                           |
| Px007883.1 | 1.1153 | 4.95E-21 | 3.49E-20 | Probable medium-chain specific acyl-CoA dehydrogenase, mitochondrial |

### Involved in glycerophospholipid metabolism

|            |         |           |           |                                                                 |
|------------|---------|-----------|-----------|-----------------------------------------------------------------|
| Px012560.1 | 10.5968 | 1.26E-07  | 4.83E-07  | Lipase member H-B; similar with LIPHB_XENLA                     |
| Px005646.1 | 4.6071  | 1.01E-58  | 1.31E-57  | Nose resistant to fluoxetine protein 6; similar with NRF6_CAEEL |
| Px004749.1 | 4.2513  | 0.00E+00  | 0.00E+00  | Lipoprotein lipase; similar with LIPL_CAVPO                     |
| Px000948.1 | 4.2472  | 2.43E-05  | 7.55E-05  | Gastric triacylglycerol lipase; similar with LIPG_RAT           |
| Px012694.3 | 4.1304  | 9.29E-40  | 9.57E-39  | Lipase 1; similar with LIP1_DROME                               |
| Px003528.3 | 3.9017  | 3.38E-20  | 2.32E-19  | Nose resistant to fluoxetine protein 6; similar with NRF6_CAEEL |
| Px005805.1 | 3.8398  | 5.29E-43  | 5.67E-42  | Lipase 1; similar with LIP1_DROME                               |
| Px002585.2 | 3.5836  | 3.76E-53  | 4.58E-52  | Nose resistant to fluoxetine protein 6; similar with NRF6_CAEEL |
| Px005804.1 | 3.4363  | 2.24E-142 | 5.42E-141 | Lipase 1; similar with LIP1_DROME                               |
| Px009940.2 | 3.4221  | 6.33E-52  | 7.64E-51  | Acetylcholinesterase; similar with ACES_CULPI                   |
| Px009569.1 | 3.3179  | 0.00E+00  | 0.00E+00  | Trypsin CFT-1; similar with TRYP_CHOFU                          |
| Px011477.2 | 3.1975  | 0.00E+00  | 0.00E+00  | Lipase 1; similar with LIP1_DROME                               |
| Px003182.1 | 3.1217  | 2.62E-07  | 9.75E-07  | Acyl-CoA:lysophosphatidylglycerol acyltransferase 1             |
| Px001526.1 | 3.1070  | 4.54E-37  | 4.47E-36  | Lipase 1; similar with LIP1_DROME                               |
| Px000371.1 | 3.0476  | 0.00E+00  | 0.00E+00  | Lipase 1; similar with LIP1_DROME                               |
| Px012695.1 | 2.9423  | 3.93E-150 | 9.92E-149 | Lipase 1; similar with LIP1_DROME                               |
| Px011788.2 | 2.8400  | 3.24E-222 | 1.09E-220 | Pancreatic lipase-related protein 2; similar with LIPR2_BOVIN   |
| Px005417.1 | 2.8142  | 7.10E-18  | 4.51E-17  | Nose resistant to fluoxetine protein 6; similar with NRF6_CAEEL |
| Px001527.1 | 2.7935  | 7.50E-09  | 3.13E-08  | Lipase 1; similar with LIP1_DROME                               |
| Px015388.1 | 2.7618  | 1.35E-08  | 5.50E-08  | Nose resistant to fluoxetine protein 6; similar with NRF6_CAEEL |
| Px005418.1 | 2.6622  | 6.87E-07  | 2.48E-06  | Nose resistant to fluoxetine protein 6; similar with NRF6_CAEEL |
| Px005193.2 | 2.5958  | 2.33E-141 | 5.61E-140 | Pancreatic lipase-related protein 2; similar with LIPR2_MYOCO   |
| Px009691.1 | 2.5676  | 5.36E-19  | 3.56E-18  | Lipase 1; similar with LIP1_DROME                               |
| Px006345.1 | 2.5102  | 0.00E+00  | 0.00E+00  | Pancreatic lipase-related protein 2; similar with LIPR2_MYOCO   |
| Px011049.1 | 2.5090  | 4.88E-35  | 4.62E-34  | Acetylcholinesterase; similar with ACES_FELCA                   |
| Px004750.1 | 2.4896  | 0.00E+00  | 0.00E+00  | Pancreatic lipase-related protein 2; similar with LIPR2_RAT     |
| Px001913.1 | 2.4737  | 1.20E-150 | 3.03E-149 | Gastric triacylglycerol lipase; similar with LIPG_RAT           |
| Px011475.1 | 2.3683  | 0.00E+00  | 0.00E+00  | Lipase 3; similar with LIP3_DROME                               |
| Px004752.1 | 2.3527  | 0.00E+00  | 0.00E+00  | Pancreatic lipase-related protein 2; similar with LIPR2_BOVIN   |
| Px004753.1 | 2.3410  | 9.82E-208 | 3.12E-206 | Pancreatic lipase-related protein 2; similar with LIPR2_MYOCO   |
| Px008913.1 | 2.1926  | 0.00E+00  | 0.00E+00  | Acetylcholinesterase; similar with ACES_CULPI                   |
| Px002296.1 | 2.1474  | 1.41E-169 | 3.92E-168 | Pancreatic triacylglycerol lipase; similar with LIPP_HUMAN      |
| Px002964.1 | 2.1362  | 2.49E-07  | 9.29E-07  | Putative uncharacterized protein; similar with E9H4D7_DAPPU     |
| Px003273.1 | 2.1129  | 6.40E-16  | 3.82E-15  | Pancreatic lipase-related protein 2; similar with LIPR2_CAVPO   |
| Px004200.1 | 2.0610  | 1.11E-81  | 1.81E-80  | Putative phosphatidate phosphatase; similar with WUN_DROME      |
| Px012696.1 | 2.0159  | 2.21E-135 | 5.07E-134 | Lipase 3; similar with LIP3_DROME                               |
| Px004751.1 | 1.9293  | 0.00E+00  | 0.00E+00  | Pancreatic triacylglycerol lipase; similar with LIPP_HUMAN      |
| Px016338.1 | 1.9089  | 9.52E-63  | 1.31E-61  | Lipase 1; similar with LIP1_DROME                               |
| Px012937.2 | 1.8846  | 1.37E-05  | 4.37E-05  | Phospholipase D1; similar with PLD1_HUMAN                       |
| Px002295.1 | 1.7684  | 0.00E+00  | 0.00E+00  | Pancreatic lipase-related protein 2; similar with LIPR2_BOVIN   |
| Px011476.1 | 1.7230  | 8.10E-19  | 5.34E-18  | Lipase 3; similar with LIP3_DROME                               |
| Px013101.1 | 1.6622  | 3.21E-06  | 1.09E-05  | Nose resistant to fluoxetine protein 6; similar with NRF6_CAEEL |
| Px003712.1 | 1.6490  | 1.05E-19  | 7.17E-19  | Acetylcholinesterase; similar with ACES_CULPI                   |
| Px017997.1 | 1.6216  | 3.59E-04  | 9.62E-04  | Esterase FE4; similar with ESTF_MYZPE                           |
| Px011624.1 | 1.5666  | 4.24E-07  | 1.55E-06  | Nose resistant to fluoxetine protein 6; similar with NRF6_CAEEL |

|            |        |           |           |                                                                 |
|------------|--------|-----------|-----------|-----------------------------------------------------------------|
| Px014702.1 | 1.5035 | 1.75E-04  | 4.92E-04  | Lysine-specific demethylase 8; similar with KDM8_RAT            |
| Px016066.1 | 1.4923 | 1.12E-13  | 6.06E-13  | Lipase member M; similar with LIPM_MOUSE                        |
| Px006720.1 | 1.4070 | 1.32E-07  | 5.02E-07  | Glycerol-3-phosphate acyltransferase 4                          |
| Px017196.1 | 1.3834 | 3.80E-22  | 2.75E-21  | Choline/ethanolamine kinase; similar with CHKB_HUMAN            |
| Px014079.1 | 1.2713 | 4.69E-10  | 2.13E-09  | Nose resistant to fluoxetine protein 6; similar with NRF6_CAEEL |
| Px001937.2 | 1.2673 | 3.55E-115 | 7.31E-114 | Phosphatidate phosphatase LPIN2; similar with LPIN2_MOUSE       |
| Px006231.1 | 1.2299 | 8.55E-52  | 1.03E-50  | Protein B602L; similar with VF602_ASFB7                         |
| Px007406.1 | 1.2241 | 1.13E-04  | 3.24E-04  | Transmembrane protein nesy; similar with NESSY_DROME            |
| Px001894.8 | 1.1880 | 5.51E-25  | 4.27E-24  | Ethanolamine-phosphate cytidylyltransferase                     |
| Px004131.5 | 1.1474 | 6.20E-26  | 4.92E-25  | Calcium-independent phospholipase A2-gamma                      |
| Px010099.1 | 1.1453 | 2.76E-19  | 1.85E-18  | Phospholipase D1; similar with PLD1_RAT                         |
| Px011234.1 | 1.0051 | 2.16E-04  | 5.97E-04  | Nose resistant to fluoxetine protein 6; similar with NRF6_CAEEL |

### Involved in steroid hormone biosynthesis

|            |         |           |           |                                                              |
|------------|---------|-----------|-----------|--------------------------------------------------------------|
| Px009293.1 | 11.1045 | 9.55E-06  | 3.10E-05  | Probable cytochrome P450 304a1; similar with CP304_DROME     |
| Px009572.1 | 9.2901  | 5.34E-07  | 1.94E-06  | Cytochrome P450 6B1; similar with CP6B1_PAPPO                |
| Px000114.1 | 3.5971  | 6.55E-42  | 6.92E-41  | Sulfotransferase 1C4; similar with ST1C4_HUMAN               |
| Px002723.1 | 2.9848  | 0.00E+00  | 0.00E+00  | Cytochrome P450 6B7; similar with CP6B7_HELAM                |
| Px015642.1 | 2.8052  | 4.74E-10  | 2.15E-09  | Estradiol 17-beta-dehydrogenase 8; similar with DHB8_CANFA   |
| Px014883.1 | 2.5298  | 7.38E-32  | 6.64E-31  | Ecdysteroid UDP-glucosyltransferase; similar with UDPE_NPVSL |
| Px013884.1 | 2.4758  | 5.37E-18  | 3.43E-17  | Probable cytochrome P450 9f2; similar with CP9F2_DROME       |
| Px014981.1 | 2.4259  | 0.00E+00  | 0.00E+00  | Cytochrome P450 9e2; similar with CP9E2_BLAGE                |
| Px005902.4 | 2.1318  | 2.80E-119 | 5.89E-118 | Cytochrome P450 6B6; similar with CP6B6_HELAM                |
| Px004854.1 | 2.1011  | 1.06E-15  | 6.27E-15  | Ecdysteroid UDP-glucosyltransferase; similar with UDPE_NPVSL |
| Px014216.1 | 1.9094  | 1.32E-40  | 1.38E-39  | Cytochrome P450 6B6; similar with CP6B6_HELAM                |
| Px000872.2 | 1.8756  | 1.82E-09  | 7.93E-09  | Ecdysteroid UDP-glucosyltransferase; similar with UDPE_NPVSL |
| Px000647.3 | 1.8232  | 6.21E-280 | 2.49E-278 | UDP-glucuronosyltransferase 2B7; similar with UD2B7_HUMAN    |
| Px011727.1 | 1.7734  | 6.73E-64  | 9.35E-63  | Protein GCY; similar with GCY_YEAST                          |
| Px001113.1 | 1.6873  | 1.59E-11  | 7.83E-11  | Ecdysteroid UDP-glucosyltransferase; similar with UDPE_NPVSL |
| Px004643.1 | 1.5882  | 6.58E-06  | 2.17E-05  | Cytochrome P450 6B6; similar with CP6B6_HELAM                |
| Px013958.1 | 1.5211  | 6.83E-145 | 1.68E-143 | Cytochrome P450 6k1; similar with CP6K1_BLAGE                |
| Px014982.1 | 1.4635  | 0.00E+00  | 0.00E+00  | Probable cytochrome P450 9f2; similar with CP9F2_DROME       |
| Px013203.1 | 1.4517  | 2.86E-06  | 9.77E-06  | UDP-glucuronosyltransferase 2B2; similar with UD2B2_RAT      |
| Px006292.1 | 1.2679  | 2.20E-13  | 1.18E-12  | Ecdysteroid UDP-glucosyltransferase; similar with UDPE_NPVSL |
| Px017253.1 | 1.2169  | 4.53E-37  | 4.47E-36  | Cytochrome P450 6B2; similar with CP6B2_HELAM                |
| Px000039.1 | 1.1965  | 1.40E-231 | 4.93E-230 | UDP-glucuronosyltransferase 1-8; similar with UD18_RAT       |
| Px001164.1 | 1.1390  | 6.83E-117 | 1.42E-115 | UDP-glucuronosyltransferase; similar with UGT3_PLEPL         |
| Px009675.1 | 1.1334  | 1.86E-96  | 3.40E-95  | UDP-glucuronosyltransferase 1-2; similar with UD12_MOUSE     |
| Px015080.1 | 1.1199  | 3.36E-06  | 1.14E-05  | Ecdysteroid UDP-glucosyltransferase; similar with UDPE_NPVMB |
| Px005900.1 | 1.0773  | 1.30E-16  | 7.94E-16  | Cytochrome P450 6B2; similar with CP6B2_HELAM                |
| Px011285.1 | 1.0624  | 2.26E-250 | 8.22E-249 | UDP-glucuronosyltransferase 2B4; similar with UD2B4_HUMAN    |

### Involved in PPAR signaling pathway

|            |        |           |           |                                                               |
|------------|--------|-----------|-----------|---------------------------------------------------------------|
| Px004749.1 | 4.2513 | 0.00E+00  | 0.00E+00  | Lipoprotein lipase; similar with LIPL_CAVPO                   |
| Px008783.1 | 3.5367 | 1.08E-05  | 3.49E-05  | Long-chain fatty acid transport protein 1                     |
| Px008088.2 | 2.8173 | 0.00E+00  | 0.00E+00  | Lipoprotein lipase; similar with LIPL_CAVPO                   |
| Px017039.1 | 2.6501 | 0.00E+00  | 0.00E+00  | Putative acyl-CoA-binding protein; similar with ACBP_HYPDU    |
| Px005193.2 | 2.5958 | 2.33E-141 | 5.61E-140 | Pancreatic lipase-related protein 2; similar with LIPR2_MYOCO |
| Px005199.1 | 2.5327 | 1.44E-159 | 3.81E-158 | Long-chain fatty acid transport protein 4                     |
| Px004750.1 | 2.4896 | 0.00E+00  | 0.00E+00  | Pancreatic lipase-related protein 2; similar with LIPR2_RAT   |
| Px004752.1 | 2.3527 | 0.00E+00  | 0.00E+00  | Pancreatic lipase-related protein 2; similar with LIPR2_BOVIN |
| Px004753.1 | 2.3410 | 9.82E-208 | 3.12E-206 | Pancreatic lipase-related protein 2; similar with LIPR2_MYOCO |
| Px006441.1 | 2.3113 | 0.00E+00  | 0.00E+00  | Lipase member H; similar with LIPH_RAT                        |
| Px001337.1 | 2.2940 | 0.00E+00  | 0.00E+00  | Putative uncharacterized protein; similar with A9NYL2_PICSI   |

|            |         |           |           |                                                                      |
|------------|---------|-----------|-----------|----------------------------------------------------------------------|
| Px007360.3 | 2.2294  | 2.18E-223 | 7.44E-222 | 3-phosphoinositide-dependent protein kinase 1                        |
| Px000744.1 | 2.0773  | 1.67E-04  | 4.72E-04  | Lipase member H-A; similar with LIPHA_XENLA                          |
| Px006440.1 | 2.0668  | 1.56E-48  | 1.81E-47  | Phospholipase A1 member A; similar with PLA1A_HUMAN                  |
| Px006500.1 | 2.0492  | 9.92E-42  | 1.05E-40  | Peroxisomal acyl-coenzyme A oxidase 3                                |
| Px006763.1 | 2.0407  | 1.02E-05  | 3.30E-05  | Peroxisomal acyl-coenzyme A oxidase 3                                |
| Px004751.1 | 1.9293  | 0.00E+00  | 0.00E+00  | Pancreatic triacylglycerol lipase; similar with LIPP_HUMAN           |
| Px015380.1 | 1.9245  | 1.43E-39  | 1.47E-38  | Acyl-CoA Delta(11) desaturase; similar with ACO11_TRINI              |
| Px002295.1 | 1.7684  | 0.00E+00  | 0.00E+00  | Pancreatic lipase-related protein 2; similar with LIPR2_BOVIN        |
| Px000844.1 | 1.7136  | 3.72E-14  | 2.07E-13  | Ribosomal protein S6 kinase delta-1; similar with KS6C1_HUMAN        |
| Px001605.1 | 1.5936  | 1.14E-246 | 4.14E-245 | Putative acyl-CoA-binding protein; similar with ACBP_HYPDU           |
| Px000132.1 | 1.5866  | 3.04E-79  | 4.87E-78  | FGGY carbohydrate kinase domain-containing protein                   |
| Px011340.1 | 1.5860  | 0.00E+00  | 0.00E+00  | Non-specific lipid-transfer protein; similar with NLTP_CHICK         |
| Px001531.1 | 1.5708  | 7.84E-60  | 1.04E-58  | Probable peroxisomal acyl-coenzyme A oxidase 1                       |
| Px000524.1 | 1.5210  | 2.27E-74  | 3.48E-73  | Putative acyl-CoA-binding protein; similar with ACBP_HYPDU           |
| Px007047.2 | 1.5134  | 9.55E-05  | 2.77E-04  | Probable peroxisomal acyl-coenzyme A oxidase 1                       |
| Px016733.1 | 1.2758  | 1.82E-09  | 7.92E-09  | Acyl-CoA synthetase family member 3, mitochondrial                   |
| Px013837.1 | 1.2663  | 1.45E-04  | 4.10E-04  | Carnitine O-palmitoyltransferase 1, muscle isoform                   |
| Px010887.1 | 1.1902  | 3.16E-21  | 2.24E-20  | Phosphoenolpyruvate carboxykinase [GTP]                              |
| Px015376.1 | 1.1200  | 1.05E-146 | 2.61E-145 | Phosphoenolpyruvate carboxykinase [GTP]                              |
| Px007883.1 | 1.1153  | 4.95E-21  | 3.49E-20  | Probable medium-chain specific acyl-CoA dehydrogenase, mitochondrial |
| Px008080.1 | 1.0773  | 1.70E-05  | 5.37E-05  | Lysosome membrane protein 2; similar with SCRB2_HUMAN                |
| Px016558.1 | 1.0773  | 3.20E-04  | 8.66E-04  | Putative glycerol kinase 5; similar with GLPK5_DANRE                 |
| Px013239.1 | 1.0562  | 3.46E-07  | 1.28E-06  | Putative glycerol kinase 3; similar with GLPK3_HUMAN                 |
| Px005198.1 | 1.0445  | 2.21E-21  | 1.58E-20  | Long-chain fatty acid transport protein 4                            |
| Px008837.1 | 1.0217  | 1.55E-94  | 2.77E-93  | Long-chain-fatty-acid--CoA ligase ACSBG2                             |
| Px013405.1 | -1.5636 | 1.01E-18  | 6.66E-18  | CAP isoform A; similar with C9DTM4_BOMMO                             |
| Px017708.4 | -1.4493 | 1.01E-40  | 1.05E-39  | Long-chain-fatty-acid--CoA ligase 1; similar with ACSL1_RAT          |

### Involved in vitamin digestion and absorption

|            |         |           |           |                                                               |
|------------|---------|-----------|-----------|---------------------------------------------------------------|
| Px000644.1 | 12.4260 | 4.78E-37  | 4.70E-36  | Pancreatic triacylglycerol lipase; similar with LIPP_MOUSE    |
| Px012560.1 | 10.5968 | 1.26E-07  | 4.83E-07  | Lipase member H-B; similar with LIPHB_XENLA                   |
| Px009713.1 | 7.3544  | 7.08E-09  | 2.96E-08  | Cubilin; similar with CUBN_CANFA                              |
| Px011791.1 | 4.1145  | 0.00E+00  | 0.00E+00  | Lipase member H; similar with LIPH_XENTR                      |
| Px012011.2 | 4.0620  | 0.00E+00  | 0.00E+00  | Pancreatic triacylglycerol lipase; similar with LIPP_MYOCO    |
| Px014012.2 | 3.4448  | 3.32E-59  | 4.34E-58  | Proton-coupled folate transporter; similar with PCFT_XENLA    |
| Px008089.1 | 2.8762  | 0.00E+00  | 0.00E+00  | Pancreatic lipase-related protein 2; similar with LIPR2_CAVPO |
| Px006190.1 | 2.8647  | 0.00E+00  | 0.00E+00  | Lipase member H-A; similar with LIPHA_XENLA                   |
| Px011788.2 | 2.8400  | 3.24E-222 | 1.09E-220 | Pancreatic lipase-related protein 2; similar with LIPR2_BOVIN |
| Px012537.1 | 2.7402  | 3.03E-04  | 8.22E-04  | Apolipoporphins; similar with APLP_LOCFMI                     |
| Px013824.1 | 2.4844  | 6.34E-19  | 4.20E-18  | Sensory neuron membrane protein 1; similar with SNMP1_PEDHC   |
| Px004752.1 | 2.3527  | 0.00E+00  | 0.00E+00  | Pancreatic lipase-related protein 2; similar with LIPR2_BOVIN |
| Px006441.1 | 2.3113  | 0.00E+00  | 0.00E+00  | Lipase member H; similar with LIPH_RAT                        |
| Px009761.1 | 2.2693  | 1.37E-127 | 3.02E-126 | Plasma glutamate carboxypeptidase; similar with PGCP_XENLA    |
| Px002296.1 | 2.1474  | 1.41E-169 | 3.92E-168 | Pancreatic triacylglycerol lipase; similar with LIPP_HUMAN    |
| Px003273.1 | 2.1129  | 6.40E-16  | 3.82E-15  | Pancreatic lipase-related protein 2; similar with LIPR2_CAVPO |
| Px004751.1 | 1.9293  | 0.00E+00  | 0.00E+00  | Pancreatic triacylglycerol lipase; similar with LIPP_HUMAN    |
| Px008150.1 | 1.7972  | 2.12E-17  | 1.33E-16  | Scavenger receptor class B member 1; similar with SCRB1_PIG   |
| Px001510.4 | 1.7749  | 2.77E-85  | 4.66E-84  | Scavenger receptor class B member 1; similar with SCRB1_PIG   |
| Px002295.1 | 1.7684  | 0.00E+00  | 0.00E+00  | Pancreatic lipase-related protein 2; similar with LIPR2_BOVIN |
| Px011335.1 | 1.7641  | 1.16E-13  | 6.27E-13  | Scavenger receptor class B member 1; similar with SCRB1_BOVIN |
| Px007238.1 | 1.7626  | 1.98E-23  | 1.48E-22  | Solute carrier family 46 member 3; similar with S46A3_CHICK   |
| Px011641.3 | 1.7499  | 0.00E+00  | 0.00E+00  | Vanin-like protein 2; similar with VNVL2_DROME                |
| Px012163.2 | 1.7447  | 5.09E-26  | 4.05E-25  | Protein croquemort; similar with CRQ_DROME                    |
| Px015615.1 | 1.7053  | 2.16E-07  | 8.10E-07  | Proton-coupled folate transporter; similar with PCFT_DANRE    |

|            |         |           |           |                                                             |
|------------|---------|-----------|-----------|-------------------------------------------------------------|
| Px002809.2 | 1.5031  | 7.52E-18  | 4.78E-17  | WD repeat domain phosphoinositide-interacting protein 4     |
| Px011529.1 | 1.4501  | 6.50E-117 | 1.35E-115 | Apolipoporphins; similar with APLP_LOCFI                    |
| Px014014.2 | 1.2587  | 6.46E-21  | 4.55E-20  | Proton-coupled folate transporter; similar with PCFT_DANRE  |
| Px014013.2 | 1.2197  | 1.13E-07  | 4.34E-07  | Proton-coupled folate transporter; similar with PCFT_DANRE  |
| Px014019.1 | 1.1874  | 2.13E-08  | 8.57E-08  | Solute carrier family 46 member 3; similar with S46A3_CHICK |
| Px015324.1 | 1.1450  | 2.99E-40  | 3.10E-39  | Proton-coupled folate transporter; similar with PCFT_XENLA  |
| Px012098.2 | 1.0475  | 2.15E-05  | 6.71E-05  | Lipase member I; similar with LIPI_HUMAN                    |
| Px009302.2 | -1.5524 | 1.01E-125 | 2.21E-124 | Putative uncharacterized protein; similar with D7GYL0_TRICA |
| Px006184.1 | -1.5077 | 3.41E-07  | 1.26E-06  | Neuropilin and tolloid-like protein 1                       |
| Px014011.1 | -1.2447 | 1.09E-04  | 3.13E-04  | Proton-coupled folate transporter; similar with PCFT_XENLA  |
| Px016584.2 | -1.1902 | 1.13E-07  | 4.34E-07  | Solute carrier family 23 member 2; similar with S23A2_XENTR |

### Involved in retinol metabolism

|            |         |           |           |                                                              |
|------------|---------|-----------|-----------|--------------------------------------------------------------|
| Px009293.1 | 11.1045 | 9.55E-06  | 3.10E-05  | Probable cytochrome P450 304a1; similar with CP304_DROME     |
| Px009572.1 | 9.2901  | 5.34E-07  | 1.94E-06  | Cytochrome P450 6B1; similar with CP6B1_PAPPO                |
| Px002723.1 | 2.9848  | 0.00E+00  | 0.00E+00  | Cytochrome P450 6B7; similar with CP6B7_HELAM                |
| Px006696.1 | 2.6893  | 0.00E+00  | 0.00E+00  | Short-chain dehydrogenase/reductase family 16C member 6      |
| Px014883.1 | 2.5298  | 7.38E-32  | 6.64E-31  | Ecdysteroid UDP-glucosyltransferase; similar with UDPE_NPVSL |
| Px013884.1 | 2.4758  | 5.37E-18  | 3.43E-17  | Probable cytochrome P450 9f2; similar with CP9F2_DROME       |
| Px014981.1 | 2.4259  | 0.00E+00  | 0.00E+00  | Cytochrome P450 9e2; similar with CP9E2_BLAG                 |
| Px006319.1 | 2.1734  | 2.37E-82  | 3.89E-81  | Retinol dehydrogenase 11; similar with RDH11_HUMAN           |
| Px005902.4 | 2.1318  | 2.80E-119 | 5.89E-118 | Cytochrome P450 6B6; similar with CP6B6_HELAM                |
| Px004854.1 | 2.1011  | 1.06E-15  | 6.27E-15  | Ecdysteroid UDP-glucosyltransferase; similar with UDPE_NPVSL |
| Px014216.1 | 1.9094  | 1.32E-40  | 1.38E-39  | Cytochrome P450 6B6; similar with CP6B6_HELAM                |
| Px000872.2 | 1.8756  | 1.82E-09  | 7.93E-09  | Ecdysteroid UDP-glucosyltransferase; similar with UDPE_NPVSL |
| Px010853.1 | 1.8586  | 7.49E-18  | 4.76E-17  | Retinol dehydrogenase 11; similar with RDH11_MOUSE           |
| Px000647.3 | 1.8232  | 6.21E-280 | 2.49E-278 | UDP-glucuronosyltransferase 2B7; similar with UD2B7_HUMAN    |
| Px005070.1 | 1.7143  | 1.14E-73  | 1.74E-72  | Glucose 1-dehydrogenase 2; similar with DHG2_BACME           |
| Px001113.1 | 1.6873  | 1.59E-11  | 7.83E-11  | Ecdysteroid UDP-glucosyltransferase; similar with UDPE_NPVSL |
| Px004643.1 | 1.5882  | 6.58E-06  | 2.17E-05  | Cytochrome P450 6B6; similar with CP6B6_HELAM                |
| Px008706.2 | 1.5512  | 3.40E-05  | 1.04E-04  | WW domain-containing oxidoreductase                          |
| Px013958.1 | 1.5211  | 6.83E-145 | 1.68E-143 | Cytochrome P450 6k1; similar with CP6K1_BLAG                 |
| Px014982.1 | 1.4635  | 0.00E+00  | 0.00E+00  | Probable cytochrome P450 9f2; similar with CP9F2_DROME       |
| Px013203.1 | 1.4517  | 2.86E-06  | 9.77E-06  | UDP-glucuronosyltransferase 2B2; similar with UD2B2_RAT      |
| Px006694.1 | 1.3215  | 6.61E-31  | 5.85E-30  | Epidermal retinol dehydrogenase 2; similar with RDHE2_MOUSE  |
| Px006292.1 | 1.2679  | 2.20E-13  | 1.18E-12  | Ecdysteroid UDP-glucosyltransferase; similar with UDPE_NPVSL |
| Px017253.1 | 1.2169  | 4.53E-37  | 4.47E-36  | Cytochrome P450 6B2; similar with CP6B2_HELAM                |
| Px000039.1 | 1.1965  | 1.40E-231 | 4.93E-230 | UDP-glucuronosyltransferase 1-8; similar with UD18_RAT       |
| Px013246.1 | 1.1587  | 3.16E-98  | 5.83E-97  | Dehydrogenase/reductase SDR family member 4                  |
| Px001164.1 | 1.1390  | 6.83E-117 | 1.42E-115 | UDP-glucuronosyltransferase; similar with UGT3_PLEPL         |
| Px009675.1 | 1.1334  | 1.86E-96  | 3.40E-95  | UDP-glucuronosyltransferase 1-2; similar with UD12_MOUSE     |
| Px015080.1 | 1.1199  | 3.36E-06  | 1.14E-05  | Ecdysteroid UDP-glucosyltransferase; similar with UDPE_NPVMB |
| Px005900.1 | 1.0773  | 1.30E-16  | 7.94E-16  | Cytochrome P450 6B2; similar with CP6B2_HELAM                |
| Px011285.1 | 1.0624  | 2.26E-250 | 8.22E-249 | UDP-glucuronosyltransferase 2B4; similar with UD2B4_HUMAN    |
| Px015569.1 | 1.0487  | 2.19E-22  | 1.60E-21  | 3-oxoacyl-[acyl-carrier-protein] reductase FabG              |
| Px010797.1 | 1.0393  | 1.27E-07  | 4.84E-07  | Epidermal retinol dehydrogenase 2; similar with RDHE2_MOUSE  |
| Px007377.1 | -1.9772 | 8.53E-07  | 3.05E-06  | Glucose 1-dehydrogenase 1; similar with DHG1_BACME           |

### Involved in drug metabolism - other enzymes

|            |        |          |          |                                                             |
|------------|--------|----------|----------|-------------------------------------------------------------|
| Px009572.1 | 9.2901 | 5.34E-07 | 1.94E-06 | Cytochrome P450 6B1; similar with CP6B1_PAPPO               |
| Px014859.2 | 3.9352 | 1.13E-07 | 4.34E-07 | Uridine phosphorylase 1; similar with UPP1_MOUSE            |
| Px004815.1 | 3.9017 | 3.38E-20 | 2.32E-19 | Gut esterase 1; similar with EST1_CAEEL                     |
| Px009019.1 | 3.7997 | 1.15E-15 | 6.76E-15 | Uridine phosphorylase 1; similar with UPP1_MOUSE            |
| Px005119.1 | 3.7777 | 1.08E-09 | 4.79E-09 | Retrovirus-related Pol polyprotein from transposon TNT 1-94 |

|            |         |           |           |                                                              |
|------------|---------|-----------|-----------|--------------------------------------------------------------|
| Px003352.1 | 3.1927  | 1.50E-30  | 1.32E-29  | Venom carboxylesterase-6; similar with EST6_APIME            |
| Px002723.1 | 2.9848  | 0.00E+00  | 0.00E+00  | Cytochrome P450 6B7; similar with CP6B7_HELAM                |
| Px017996.1 | 2.7512  | 1.00E-177 | 2.87E-176 | Acetylcholinesterase; similar with ACES_HUMAN                |
| Px000089.1 | 2.6887  | 2.89E-87  | 4.95E-86  | Acetylcholinesterase; similar with ACES_FELCA                |
| Px002735.1 | 2.6010  | 1.66E-257 | 6.15E-256 | Esterase FE4; similar with ESTF_MYZPE                        |
| Px014883.1 | 2.5298  | 7.38E-32  | 6.64E-31  | Ecdysteroid UDP-glucosyltransferase; similar with UDPE_NPVSL |
| Px011049.1 | 2.5090  | 4.88E-35  | 4.62E-34  | Acetylcholinesterase; similar with ACES_FELCA                |
| Px002736.1 | 2.4868  | 0.00E+00  | 0.00E+00  | Venom carboxylesterase-6; similar with EST6_APIME            |
| Px013884.1 | 2.4758  | 5.37E-18  | 3.43E-17  | Probable cytochrome P450 9f2; similar with CP9F2_DROME       |
| Px014981.1 | 2.4259  | 0.00E+00  | 0.00E+00  | Cytochrome P450 9e2; similar with CP9E2_BLAGE                |
| Px006430.1 | 2.4038  | 1.48E-302 | 6.22E-301 | Esterase FE4; similar with ESTF_MYZPE                        |
| Px005687.1 | 2.2408  | 8.49E-30  | 7.38E-29  | Venom carboxylesterase-6; similar with EST6_APIME            |
| Px003649.1 | 2.1363  | 0.00E+00  | 0.00E+00  | Esterase FE4; similar with ESTF_MYZPE                        |
| Px005902.4 | 2.1318  | 2.80E-119 | 5.89E-118 | Cytochrome P450 6B6; similar with CP6B6_HELAM                |
| Px004854.1 | 2.1011  | 1.06E-15  | 6.27E-15  | Ecdysteroid UDP-glucosyltransferase; similar with UDPE_NPVSL |
| Px000515.1 | 1.9774  | 1.03E-98  | 1.91E-97  | Esterase FE4; similar with ESTF_MYZPE                        |
| Px014216.1 | 1.9094  | 1.32E-40  | 1.38E-39  | Cytochrome P450 6B6; similar with CP6B6_HELAM                |
| Px000872.2 | 1.8756  | 1.82E-09  | 7.93E-09  | Ecdysteroid UDP-glucosyltransferase; similar with UDPE_NPVSL |
| Px000647.3 | 1.8232  | 6.21E-280 | 2.49E-278 | UDP-glucuronosyltransferase 2B7; similar with UD2B7_HUMAN    |
| Px001113.1 | 1.6873  | 1.59E-11  | 7.83E-11  | Ecdysteroid UDP-glucosyltransferase; similar with UDPE_NPVSL |
| Px017997.1 | 1.6216  | 3.59E-04  | 9.62E-04  | Esterase FE4; similar with ESTF_MYZPE                        |
| Px004643.1 | 1.5882  | 6.58E-06  | 2.17E-05  | Cytochrome P450 6B6; similar with CP6B6_HELAM                |
| Px013958.1 | 1.5211  | 6.83E-145 | 1.68E-143 | Cytochrome P450 6k1; similar with CP6K1_BLAGE                |
| Px007772.1 | 1.5076  | 2.80E-66  | 3.96E-65  | Esterase B1; similar with EST1_CULPI                         |
| Px014982.1 | 1.4635  | 0.00E+00  | 0.00E+00  | Probable cytochrome P450 9f2; similar with CP9F2_DROME       |
| Px013203.1 | 1.4517  | 2.86E-06  | 9.77E-06  | UDP-glucuronosyltransferase 2B2; similar with UD2B2_RAT      |
| Px006292.1 | 1.2679  | 2.20E-13  | 1.18E-12  | Ecdysteroid UDP-glucosyltransferase; similar with UDPE_NPVSL |
| Px010076.1 | 1.2570  | 6.78E-14  | 3.72E-13  | Carboxyl/choline esterase CCE014a; similar with D5G3E6_HELAM |
| Px017253.1 | 1.2169  | 4.53E-37  | 4.47E-36  | Cytochrome P450 6B2; similar with CP6B2_HELAM                |
| Px000039.1 | 1.1965  | 1.40E-231 | 4.93E-230 | UDP-glucuronosyltransferase 1-8; similar with UD18_RAT       |
| Px001164.1 | 1.1390  | 6.83E-117 | 1.42E-115 | UDP-glucuronosyltransferase; similar with UGT3_PLEPL         |
| Px009675.1 | 1.1334  | 1.86E-96  | 3.40E-95  | UDP-glucuronosyltransferase 1-2; similar with UD12_MOUSE     |
| Px015080.1 | 1.1199  | 3.36E-06  | 1.14E-05  | Ecdysteroid UDP-glucosyltransferase; similar with UDPE_NPVMB |
| Px005900.1 | 1.0773  | 1.30E-16  | 7.94E-16  | Cytochrome P450 6B2; similar with CP6B2_HELAM                |
| Px011285.1 | 1.0624  | 2.26E-250 | 8.22E-249 | UDP-glucuronosyltransferase 2B4; similar with UD2B4_HUMAN    |
| Px013693.1 | 1.0094  | 5.72E-08  | 2.23E-07  | Aldehyde oxidase; similar with ADO_HUMAN                     |
| Px012289.1 | -1.0288 | 3.16E-06  | 1.07E-05  | Liver carboxylesterase; similar with EST1_MESAU              |

### Involved in metabolic pathways

|            |         |          |          |                                                                 |
|------------|---------|----------|----------|-----------------------------------------------------------------|
| Px000644.1 | 12.4260 | 4.78E-37 | 4.70E-36 | Pancreatic triacylglycerol lipase; similar with LIPP_MOUSE      |
| Px009293.1 | 11.1045 | 9.55E-06 | 3.10E-05 | Probable cytochrome P450 304a1; similar with CP304_DROME        |
| Px003417.1 | 11.0707 | 4.48E-16 | 2.69E-15 | Beta-1,3-galactosyltransferase 5; similar with B3GT5_MOUSE      |
| Px006067.1 | 10.6233 | 1.24E-12 | 6.43E-12 | Nucleoside diphosphate kinase 7; similar with NDK7_RAT          |
| Px012560.1 | 10.5968 | 1.26E-07 | 4.83E-07 | Lipase member H-B; similar with LIPHB_XENLA                     |
| Px013527.1 | 10.4804 | 7.08E-09 | 2.96E-08 | Carbonyl reductase [NADPH] 1; similar with CBR1_RABIT           |
| Px011676.1 | 9.9119  | 4.04E-05 | 1.22E-04 | Alpha-aminoacidic semialdehyde synthase, mitochondrial          |
| Px002969.1 | 9.6359  | 1.96E-05 | 6.16E-05 | Adenylate kinase isoenzyme 1; similar with KAD1_RAT             |
| Px009572.1 | 9.2901  | 5.34E-07 | 1.94E-06 | Cytochrome P450 6B1; similar with CP6B1_PAPPO                   |
| Px002197.1 | 9.2124  | 9.55E-06 | 3.10E-05 | Putative malate dehydrogenase 1B; similar with MDH1B_BOVIN      |
| Px013761.3 | 9.0724  | 2.99E-08 | 1.19E-07 | Peroxidase; similar with PERO_DROME                             |
| Px014880.1 | 8.9447  | 4.64E-06 | 1.55E-05 | ATP synthase subunit beta, mitochondrial; similar with ATPB_RAT |
| Px010354.2 | 8.4829  | 6.15E-08 | 2.39E-07 | Envelope fusion protein; similar with ENV_NPVLD                 |
| Px015148.1 | 8.0644  | 1.96E-05 | 6.16E-05 | ATP synthase subunit beta, mitochondrial; similar with ATPB_RAT |
| Px010126.1 | 7.3719  | 5.77E-48 | 6.66E-47 | DNA-directed RNA polymerase II subunit RPB1                     |

|            |        |           |           |                                                                      |
|------------|--------|-----------|-----------|----------------------------------------------------------------------|
| Px000336.1 | 6.9841 | 2.20E-107 | 4.36E-106 | Osiris 20; similar with B6DXA7_BOMMO                                 |
| Px000337.1 | 6.0185 | 2.92E-157 | 7.59E-156 | Osiris 19; similar with B6DXA8_BOMMO                                 |
| Px001707.1 | 5.4057 | 1.10E-120 | 2.34E-119 | Membrane alanyl aminopeptidase; similar with AMPM_MANSE              |
| Px007930.1 | 5.2867 | 5.24E-11  | 2.51E-10  | Cytochrome c oxidase subunit 4 isoform 2, mitochondrial              |
| Px002027.1 | 4.7961 | 1.66E-41  | 1.74E-40  | L-sorbose 1-dehydrogenase; similar with SDH_GLUOX                    |
| Px008276.1 | 4.6077 | 0.00E+00  | 0.00E+00  | Membrane alanyl aminopeptidase; similar with AMPM_HELVI              |
| Px014796.1 | 4.3440 | 9.84E-20  | 6.71E-19  | Apyrase; similar with APY_AEDAE                                      |
| Px000024.1 | 4.3252 | 1.24E-05  | 3.97E-05  | Cuticular protein CPG4; similar with B2DBL4_9NEOP                    |
| Px000084.1 | 4.3183 | 5.99E-51  | 7.13E-50  | Cysteine sulfinic acid decarboxylase; similar with CSAD_HUMAN        |
| Px004749.1 | 4.2513 | 0.00E+00  | 0.00E+00  | Lipoprotein lipase; similar with LIPL_CAVPO                          |
| Px000948.1 | 4.2472 | 2.43E-05  | 7.55E-05  | Gastric triacylglycerol lipase; similar with LIPG_RAT                |
| Px000702.1 | 4.1858 | 2.08E-17  | 1.30E-16  | NADH dehydrogenase [ubiquinone] iron-sulfur protein 2, mitochondrial |
| Px012694.3 | 4.1304 | 9.29E-40  | 9.57E-39  | Lipase 1; similar with LIP1_DROME                                    |
| Px011791.1 | 4.1145 | 0.00E+00  | 0.00E+00  | Lipase member H; similar with LIPH_XENTR                             |
| Px000291.1 | 4.0996 | 2.97E-16  | 1.79E-15  | Myrosinase 1; similar with MYRO1_BREBR                               |
| Px007386.1 | 4.0773 | 1.56E-08  | 6.32E-08  | Carbonyl reductase [NADPH] 1; similar with CBR1_PIG                  |
| Px003596.1 | 4.0773 | 9.29E-05  | 2.70E-04  | Predicted protein; similar with A9V0D7_MONBE                         |
| Px012011.2 | 4.0620 | 0.00E+00  | 0.00E+00  | Pancreatic triacylglycerol lipase; similar with LIPP_MYOCO           |
| Px000359.2 | 4.0159 | 3.40E-22  | 2.47E-21  | Alpha-methyl dopa hypersensitive protein                             |
| Px004490.1 | 3.9557 | 0.00E+00  | 0.00E+00  | Adenosine deaminase CECR1; similar with CECR1_XENLA                  |
| Px014859.2 | 3.9352 | 1.13E-07  | 4.34E-07  | Uridine phosphorylase 1; similar with UPP1_MOUSE                     |
| Px004815.1 | 3.9017 | 3.38E-20  | 2.32E-19  | Gut esterase 1; similar with EST1_CAEEL                              |
| Px007180.1 | 3.8846 | 2.52E-32  | 2.29E-31  | Juvenile hormone esterase; similar with ESTJ_HELVI                   |
| Px005805.1 | 3.8398 | 5.29E-43  | 5.67E-42  | Lipase 1; similar with LIP1_DROME                                    |
| Px003323.1 | 3.8321 | 4.22E-07  | 1.55E-06  | LINE-1 reverse transcriptase homolog; similar with LIN1_NYCCO        |
| Px009019.1 | 3.7997 | 1.15E-15  | 6.76E-15  | Uridine phosphorylase 1; similar with UPP1_MOUSE                     |
| Px005119.1 | 3.7777 | 1.08E-09  | 4.79E-09  | Retrovirus-related Pol polyprotein from transposon TNT 1-94          |
| Px002634.1 | 3.7211 | 1.56E-06  | 5.44E-06  | Beta-1,4-N-acetylgalactosaminyltransferase bre-4                     |
| Px000708.1 | 3.6813 | 1.01E-65  | 1.42E-64  | Pyruvate kinase; similar with KPYK_DROME                             |
| Px016942.1 | 3.6242 | 1.71E-40  | 1.77E-39  | NADH dehydrogenase [ubiquinone] 1 beta subcomplex subunit 9          |
| Px011202.1 | 3.5882 | 8.25E-143 | 2.01E-141 | Aromatic-L-amino-acid decarboxylase; similar with DDC_MANSE          |
| Px000982.1 | 3.5851 | 4.17E-39  | 4.24E-38  | Catalase; similar with CATA_GLARU                                    |
| Px014253.1 | 3.5691 | 1.39E-10  | 6.48E-10  | Unknown functio                                                      |
| Px005431.1 | 3.5627 | 7.25E-13  | 3.80E-12  | ATP synthase E chain; similar with C9W1E1_RHISA                      |
| Px008598.1 | 3.5627 | 7.25E-13  | 3.80E-12  | Phosphatidylinositol glycan anchor biosynthesis class U protein      |
| Px005494.1 | 3.5545 | 9.06E-52  | 1.09E-50  | Tubulin polyglutamylase TTLL6; similar with TTLL6_MOUSE              |
| Px014693.1 | 3.5102 | 2.59E-12  | 1.32E-11  | Nucleoside diphosphate kinase homolog 5                              |
| Px003371.1 | 3.4542 | 6.30E-39  | 6.39E-38  | NADH dehydrogenase [ubiquinone] 1 alpha subcomplex subunit 8         |
| Px005804.1 | 3.4363 | 2.24E-142 | 5.42E-141 | Lipase 1; similar with LIP1_DROME                                    |
| Px009940.2 | 3.4221 | 6.33E-52  | 7.64E-51  | Acetylcholinesterase; similar with ACES_CULPI                        |
| Px006617.2 | 3.3534 | 1.05E-31  | 9.40E-31  | Chorion peroxidase; similar with PERC_DROME                          |
| Px009020.1 | 3.3475 | 1.24E-134 | 2.82E-133 | Protein C9orf138, putative; similar with E0VSG8_PEDHC                |
| Px008277.1 | 3.3443 | 1.09E-141 | 2.62E-140 | Membrane alanyl aminopeptidase; similar with AMPM_MANSE              |
| Px007120.2 | 3.3099 | 1.50E-19  | 1.02E-18  | ATP synthase subunit beta, mitochondrial                             |
| Px013989.1 | 3.2472 | 4.09E-08  | 1.62E-07  | NADH dehydrogenase [ubiquinone] flavoprotein 2, mitochondrial        |
| Px007471.1 | 3.2141 | 3.12E-82  | 5.11E-81  | Pyruvate kinase; similar with KPYK_DROME                             |
| Px012208.1 | 3.1992 | 4.12E-29  | 3.54E-28  | Probable flavin-containing monoamine oxidase A                       |
| Px011477.2 | 3.1975 | 0.00E+00  | 0.00E+00  | Lipase 1; similar with LIP1_DROME                                    |
| Px004605.1 | 3.1961 | 1.06E-135 | 2.45E-134 | Sphingomyelin phosphodiesterase; similar with ASM_HUMAN              |
| Px003352.1 | 3.1927 | 1.50E-30  | 1.32E-29  | Venom carboxylesterase-6; similar with EST6_APIME                    |
| Px007137.2 | 3.1853 | 1.13E-132 | 2.54E-131 | Peroxidase; similar with PERO_DROME                                  |
| Px005513.1 | 3.1816 | 1.98E-25  | 1.56E-24  | Polypeptide N-acetylgalactosaminyltransferase 1                      |
| Px017834.1 | 3.1217 | 2.62E-07  | 9.75E-07  | NEDD8 ultimate buster 1; similar with NUB1_HUMAN                     |
| Px001526.1 | 3.1070 | 4.54E-37  | 4.47E-36  | Lipase 1; similar with LIP1_DROME                                    |

|            |        |           |           |                                                                      |
|------------|--------|-----------|-----------|----------------------------------------------------------------------|
| Px005368.1 | 3.0773 | 1.61E-47  | 1.85E-46  | Malate dehydrogenase 2, mitochondrial                                |
| Px009080.1 | 3.0773 | 6.20E-26  | 4.92E-25  | Vacuolar ATP synthase subunit S1, putative                           |
| Px000371.1 | 3.0476 | 0.00E+00  | 0.00E+00  | Lipase 1; similar with LIP1_DROME                                    |
| Px017452.1 | 3.0407 | 2.97E-08  | 1.18E-07  | Putative uncharacterized protein; similar with D6WQR2_TRICA          |
| Px002723.1 | 2.9848 | 0.00E+00  | 0.00E+00  | Cytochrome P450 6B7; similar with CP6B7_HELAM                        |
| Px004698.1 | 2.9517 | 1.27E-16  | 7.77E-16  | NADH dehydrogenase [ubiquinone] iron-sulfur protein 8, mitochondrial |
| Px012695.1 | 2.9423 | 3.93E-150 | 9.92E-149 | Lipase 1; similar with LIP1_DROME                                    |
| Px003660.1 | 2.9352 | 2.46E-11  | 1.20E-10  | NADH dehydrogenase [ubiquinone] iron-sulfur protein 7, mitochondrial |
| Px011683.2 | 2.9306 | 0.00E+00  | 0.00E+00  | Venom carboxylesterase-6; similar with EST6_APIME                    |
| Px008089.1 | 2.8762 | 0.00E+00  | 0.00E+00  | Pancreatic lipase-related protein 2; similar with LIPR2_CAVPO        |
| Px006190.1 | 2.8647 | 0.00E+00  | 0.00E+00  | Lipase member H-A; similar with LIPHA_XENLA                          |
| Px007275.2 | 2.8466 | 2.07E-26  | 1.67E-25  | Glucosylceramidase; similar with GLCM_PIG                            |
| Px011788.2 | 2.8400 | 3.24E-222 | 1.09E-220 | Pancreatic lipase-related protein 2; similar with LIPR2_BOVIN        |
| Px012332.1 | 2.8227 | 3.03E-20  | 2.09E-19  | ATP synthase subunit beta, mitochondrial                             |
| Px016752.1 | 2.8120 | 1.98E-36  | 1.92E-35  | Glutamate dehydrogenase 2, mitochondrial                             |
| Px015642.1 | 2.8052 | 4.74E-10  | 2.15E-09  | Estradiol 17-beta-dehydrogenase 8; similar with DHB8_CANFA           |
| Px001527.1 | 2.7935 | 7.50E-09  | 3.13E-08  | Lipase 1; similar with LIP1_DROME                                    |
| Px002047.1 | 2.7527 | 1.74E-261 | 6.60E-260 | Uncharacterized family 31 glucosidase KIAA1161                       |
| Px017996.1 | 2.7512 | 1.00E-177 | 2.87E-176 | Acetylcholinesterase; similar with ACES_HUMAN                        |
| Px016235.1 | 2.7497 | 1.52E-09  | 6.70E-09  | 3-oxoacyl-[acyl-carrier-protein] reductase FabG                      |
| Px002926.1 | 2.7459 | 2.44E-55  | 3.05E-54  | Choline dehydrogenase, mitochondrial                                 |
| Px007430.3 | 2.7402 | 9.65E-26  | 7.64E-25  | Tektin-2; similar with TEKT2_BOVIN                                   |
| Px005043.2 | 2.7402 | 3.03E-04  | 8.22E-04  | Probable RNA-directed DNA polymerase from transposon BS              |
| Px002274.1 | 2.7121 | 0.00E+00  | 0.00E+00  | Phenoloxidase subunit 2; similar with PRP2_BOMMO                     |
| Px000089.1 | 2.6887 | 2.89E-87  | 4.95E-86  | Acetylcholinesterase; similar with ACES_FELCA                        |
| Px003755.1 | 2.6780 | 0.00E+00  | 0.00E+00  | Membrane alanyl aminopeptidase; similar with AMPM_MANSE              |
| Px006228.1 | 2.6731 | 3.87E-22  | 2.80E-21  | Beta-1,3-galactosyltransferase 5; similar with B3GT5_MOUSE           |
| Px004610.1 | 2.6440 | 7.63E-86  | 1.29E-84  | Sphingosine-1-phosphate lyase; similar with SGPL_DROME               |
| Px006940.2 | 2.6353 | 0.00E+00  | 0.00E+00  | Cytosolic beta-glucosidase; similar with GBA3_CAVPO                  |
| Px002735.1 | 2.6010 | 1.66E-257 | 6.15E-256 | Esterase FE4; similar with ESTF_MYZPE                                |
| Px000395.1 | 2.6001 | 0.00E+00  | 0.00E+00  | Alpha-amylase 4N; similar with AM4N_DROAN                            |
| Px005193.2 | 2.5958 | 2.33E-141 | 5.61E-140 | Pancreatic lipase-related protein 2; similar with LIPR2_MYOCO        |
| Px003400.1 | 2.5938 | 6.18E-17  | 3.82E-16  | EF-hand calcium-binding domain-containing protein 1                  |
| Px009691.1 | 2.5676 | 5.36E-19  | 3.56E-18  | Lipase 1; similar with LIP1_DROME                                    |
| Px005277.3 | 2.5372 | 0.00E+00  | 0.00E+00  | Lactase-phlorizin hydrolase; similar with LPH_HUMAN                  |
| Px003486.1 | 2.5359 | 0.00E+00  | 0.00E+00  | Probable maltase H; similar with MAL2_DROME                          |
| Px014883.1 | 2.5298 | 7.38E-32  | 6.64E-31  | Ecdysteroid UDP-glucosyltransferase; similar with UDPE_NPVSL         |
| Px014887.1 | 2.5258 | 3.34E-136 | 7.70E-135 | Dihydropteridine reductase; similar with DHPR_RAT                    |
| Px006345.1 | 2.5102 | 0.00E+00  | 0.00E+00  | Pancreatic lipase-related protein 2; similar with LIPR2_MYOCO        |
| Px011049.1 | 2.5090 | 4.88E-35  | 4.62E-34  | Acetylcholinesterase; similar with ACES_FELCA                        |
| Px004489.1 | 2.5013 | 7.47E-48  | 8.61E-47  | Adenosine deaminase CECR1; similar with CECR1_PONAB                  |
| Px008866.1 | 2.4968 | 7.39E-17  | 4.55E-16  | Chorion peroxidase; similar with PERC_DROME                          |
| Px002046.1 | 2.4907 | 0.00E+00  | 0.00E+00  | Uncharacterized family 31 glucosidase KIAA1161                       |
| Px004750.1 | 2.4896 | 0.00E+00  | 0.00E+00  | Pancreatic lipase-related protein 2; similar with LIPR2_RAT          |
| Px002736.1 | 2.4868 | 0.00E+00  | 0.00E+00  | Venom carboxylesterase-6; similar with EST6_APIME                    |
| Px013884.1 | 2.4758 | 5.37E-18  | 3.43E-17  | Probable cytochrome P450 9f2; similar with CP9F2_DROME               |
| Px001913.1 | 2.4737 | 1.20E-150 | 3.03E-149 | Gastric triacylglycerol lipase; similar with LIPG_RAT                |
| Px012495.1 | 2.4696 | 3.21E-04  | 8.68E-04  | Cytochrome c oxidase subunit 4 isoform 2, mitochondrial              |
| Px007691.1 | 2.4696 | 3.21E-04  | 8.67E-04  | Polypeptide N-acetylgalactosaminyltransferase 1                      |
| Px016078.1 | 2.4634 | 5.95E-157 | 1.54E-155 | ACYPI004563 protein; similar with C4WYA2_ACYPI                       |
| Px001785.1 | 2.4629 | 2.00E-24  | 1.53E-23  | Gamma-glutamyltranspeptidase 1; similar with GGT1_PIG                |
| Px010022.2 | 2.4600 | 2.32E-49  | 2.71E-48  | Cytosolic beta-glucosidase; similar with GBA3_CAVPO                  |
| Px008848.1 | 2.4433 | 2.05E-168 | 5.68E-167 | Myosinase 1; similar with MYRO1_BREBR                                |
| Px014981.1 | 2.4259 | 0.00E+00  | 0.00E+00  | Cytochrome P450 9e2; similar with CP9E2_BLAGE                        |

|            |        |           |           |                                                                        |
|------------|--------|-----------|-----------|------------------------------------------------------------------------|
| Px006430.1 | 2.4038 | 1.48E-302 | 6.22E-301 | Esterase FE4; similar with ESTF_MYZPE                                  |
| Px007764.1 | 2.3822 | 1.77E-173 | 4.99E-172 | Cytochrome c oxidase subunit 6A1, mitochondrial                        |
| Px013390.1 | 2.3727 | 1.05E-08  | 4.33E-08  | NADH dehydrogenase [ubiquinone] iron-sulfur protein 3, mitochondrial   |
| Px001708.1 | 2.3708 | 0.00E+00  | 0.00E+00  | Aminopeptidase N; similar with AMPN_PLUXY                              |
| Px011475.1 | 2.3683 | 0.00E+00  | 0.00E+00  | Lipase 3; similar with LIP3_DROME                                      |
| Px004327.1 | 2.3658 | 1.41E-24  | 1.08E-23  | Glyceraldehyde-3-phosphate dehydrogenase 2                             |
| Px004752.1 | 2.3527 | 0.00E+00  | 0.00E+00  | Pancreatic lipase-related protein 2; similar with LIPR2_BOVIN          |
| Px017856.1 | 2.3523 | 6.28E-34  | 5.85E-33  | Succinate dehydrogenase cytochrome b560 subunit, mitochondrial         |
| Px004753.1 | 2.3410 | 9.82E-208 | 3.12E-206 | Pancreatic lipase-related protein 2; similar with LIPR2_MYOCO          |
| Px001705.1 | 2.3213 | 0.00E+00  | 0.00E+00  | Membrane alanyl aminopeptidase; similar with AMPM_MANSE                |
| Px006441.1 | 2.3113 | 0.00E+00  | 0.00E+00  | Lipase member H; similar with LIPH_RAT                                 |
| Px005876.1 | 2.3107 | 8.18E-70  | 1.20E-68  | Patatin-like phospholipase domain-containing protein 2                 |
| Px004604.5 | 2.2867 | 3.97E-06  | 1.34E-05  | Envelope fusion protein; similar with ENV_NPVLD                        |
| Px005528.1 | 2.2789 | 3.18E-04  | 8.62E-04  | Cytochrome c oxidase copper chaperone                                  |
| Px012592.1 | 2.2775 | 0.00E+00  | 0.00E+00  | Juvenile hormone esterase; similar with ESTJ_HELVI                     |
| Px011160.1 | 2.2730 | 0.00E+00  | 0.00E+00  | Lactase-phlorizin hydrolase; similar with LPH_HUMAN                    |
| Px008278.1 | 2.2655 | 4.42E-37  | 4.36E-36  | Membrane alanyl aminopeptidase; similar with AMPM_MANSE                |
| Px008810.1 | 2.2431 | 1.22E-23  | 9.18E-23  | Probable tubulin polyglutamylase TTL1                                  |
| Px005687.1 | 2.2408 | 8.49E-30  | 7.38E-29  | Venom carboxylesterase-6; similar with EST6_APIME                      |
| Px001456.1 | 2.2249 | 2.79E-169 | 7.74E-168 | Gastric triacylglycerol lipase; similar with LIPG_RAT                  |
| Px007927.1 | 2.2154 | 4.79E-60  | 6.34E-59  | V-type proton ATPase subunit G; similar with VATG_MANSE                |
| Px005369.1 | 2.1951 | 1.27E-26  | 1.03E-25  | Malate dehydrogenase; similar with MDH_EDWI9                           |
| Px004946.1 | 2.1753 | 3.57E-18  | 2.30E-17  | ATP synthase subunit gamma, mitochondrial                              |
| Px006319.1 | 2.1734 | 2.37E-82  | 3.89E-81  | Retinol dehydrogenase 11; similar with RDH11_HUMAN                     |
| Px018023.1 | 2.1708 | 1.08E-51  | 1.30E-50  | Adenylate kinase isoenzyme 1; similar with KAD1_CHICK                  |
| Px016488.1 | 2.1647 | 1.18E-09  | 5.22E-09  | Glucose dehydrogenase [acceptor]; similar with DHGL_DROME              |
| Px008152.2 | 2.1559 | 5.44E-31  | 4.83E-30  | Alpha-1,6-mannosyl-glycoprotein 2-beta-N-acetylglucosaminyltransferase |
| Px004209.1 | 2.1558 | 1.50E-35  | 1.43E-34  | Putative uncharacterized protein; similar with D6WSS5_TRICA            |
| Px002296.1 | 2.1474 | 1.41E-169 | 3.92E-168 | Pancreatic triacylglycerol lipase; similar with LIPP_HUMAN             |
| Px010079.1 | 2.1426 | 1.30E-95  | 2.36E-94  | Glutamine synthetase 1, mitochondrial                                  |
| Px003205.1 | 2.1414 | 1.92E-12  | 9.88E-12  | Envelope fusion protein; similar with ENV_NPVLD                        |
| Px003742.1 | 2.1377 | 3.18E-39  | 3.23E-38  | Sphingomyelin phosphodiesterase; similar with ASM_HUMAN                |
| Px003649.1 | 2.1363 | 0.00E+00  | 0.00E+00  | Esterase FE4; similar with ESTF_MYZPE                                  |
| Px006683.1 | 2.1362 | 2.49E-07  | 9.29E-07  | Envelope fusion protein; similar with ENV_NPVLD                        |
| Px002964.1 | 2.1362 | 2.49E-07  | 9.29E-07  | Putative uncharacterized protein; similar with E9H4D7_DAPPU            |
| Px005679.1 | 2.1335 | 9.60E-184 | 2.83E-182 | Uncharacterized phosphotransferase yvkC                                |
| Px005902.4 | 2.1318 | 2.80E-119 | 5.89E-118 | Cytochrome P450 6B6; similar with CP6B6_HELAM                          |
| Px003273.1 | 2.1129 | 6.40E-16  | 3.82E-15  | Pancreatic lipase-related protein 2; similar with LIPR2_CAVPO          |
| Px008811.1 | 2.1078 | 3.17E-18  | 2.04E-17  | Probable tubulin polyglutamylase TTL1                                  |
| Px004854.1 | 2.1011 | 1.06E-15  | 6.27E-15  | Ecdysteroid UDP-glucosyltransferase; similar with UDPE_NPVSL           |
| Px014748.1 | 2.0912 | 9.16E-74  | 1.40E-72  | Unknown functio                                                        |
| Px011501.1 | 2.0881 | 7.26E-17  | 4.47E-16  | ATP synthase subunit beta, mitochondrial; similar with ATPB_RAT        |
| Px000744.1 | 2.0773 | 1.67E-04  | 4.72E-04  | Lipase member H-A; similar with LIPHA_XENLA                            |
| Px011796.5 | 2.0740 | 1.05E-51  | 1.26E-50  | Putative aminopeptidase W07G4.4; similar with YH24_CAEEL               |
| Px006440.1 | 2.0668 | 1.56E-48  | 1.81E-47  | Phospholipase A1 member A; similar with PLA1A_HUMAN                    |
| Px004200.1 | 2.0610 | 1.11E-81  | 1.81E-80  | Putative phosphatidate phosphatase; similar with WUN_DROME             |
| Px011066.2 | 2.0600 | 8.86E-30  | 7.71E-29  | EF-hand domain-containing family member B                              |
| Px006500.1 | 2.0492 | 9.92E-42  | 1.05E-40  | Peroxisomal acyl-coenzyme A oxidase 3                                  |
| Px007402.1 | 2.0481 | 1.63E-12  | 8.38E-12  | Dephospho-CoA kinase domain-containing protein                         |
| Px006763.1 | 2.0407 | 1.02E-05  | 3.30E-05  | Peroxisomal acyl-coenzyme A oxidase 3                                  |
| Px016492.1 | 2.0372 | 2.78E-33  | 2.57E-32  | Luciferin 4-monoxygenase; similar with LUCI_LUCCR                      |
| Px011034.1 | 2.0305 | 3.34E-62  | 4.54E-61  | Lysosomal alpha-glucosidase; similar with LYAG_PONAB                   |
| Px011280.1 | 2.0291 | 2.23E-60  | 2.97E-59  | 4-coumarate--CoA ligase 1; similar with 4CL1_TOBAC                     |
| Px010481.1 | 2.0283 | 7.38E-08  | 2.86E-07  | Tctex1 domain-containing protein 3; similar with TC1D3_MOUSE           |



|            |        |           |           |                                                                                    |
|------------|--------|-----------|-----------|------------------------------------------------------------------------------------|
| Px007291.1 | 2.0198 | 4.19E-15  | 2.41E-14  | Cytochrome c oxidase subunit 5B, mitochondrial                                     |
| Px012696.1 | 2.0159 | 2.21E-135 | 5.07E-134 | Lipase 3; similar with LIP3_DROME                                                  |
| Px005079.1 | 1.9962 | 0.00E+00  | 0.00E+00  | Lactase-phlorizin hydrolase; similar with LPH_HUMAN                                |
| Px013789.1 | 1.9877 | 3.65E-89  | 6.34E-88  | L-threonine 3-dehydrogenase; similar with TDH_LEGPL                                |
| Px000515.1 | 1.9774 | 1.03E-98  | 1.91E-97  | Esterase FE4; similar with ESTF_MYZPE                                              |
| Px012400.1 | 1.9673 | 6.21E-38  | 6.19E-37  | Argininosuccinate lyase; similar with ARLY2_ANAPL                                  |
| Px006941.1 | 1.9351 | 4.59E-121 | 9.83E-120 | Myrosinase 1; similar with MYRO1_BREBR                                             |
| Px008153.1 | 1.9344 | 1.29E-24  | 9.93E-24  | Alpha-1,6-mannosyl-glycoprotein 2-beta-N-acetylglucosaminyltransferase             |
| Px004751.1 | 1.9293 | 0.00E+00  | 0.00E+00  | Pancreatic triacylglycerol lipase; similar with LIPP_HUMAN                         |
| Px003754.1 | 1.9228 | 1.67E-147 | 4.13E-146 | Membrane alanyl aminopeptidase; similar with AMPM_MANSE                            |
| Px017171.1 | 1.9108 | 8.59E-16  | 5.10E-15  | Putative inositol monophosphatase 3; similar with IMPA3_DROME                      |
| Px014216.1 | 1.9094 | 1.32E-40  | 1.38E-39  | Cytochrome P450 6B6; similar with CP6B6_HELAM                                      |
| Px016338.1 | 1.9089 | 9.52E-63  | 1.31E-61  | Lipase 1; similar with LIP1_DROME                                                  |
| Px016609.1 | 1.8983 | 8.66E-07  | 3.09E-06  | Enkurin; similar with ENKUR_HUMAN                                                  |
| Px013937.1 | 1.8935 | 1.13E-09  | 4.99E-09  | 3-ketoacyl-CoA thiolase, mitochondrial; similar with THIM_HUMAN                    |
| Px012937.2 | 1.8846 | 1.37E-05  | 4.37E-05  | Phospholipase D1; similar with PLD1_HUMAN                                          |
| Px000872.2 | 1.8756 | 1.82E-09  | 7.93E-09  | Ecdysteroid UDP-glucosyltransferase; similar with UDPE_NPVSL                       |
| Px000394.1 | 1.8666 | 1.72E-210 | 5.53E-209 | Alpha-amylase 4N; similar with AM4N_DROAN                                          |
| Px010853.1 | 1.8586 | 7.49E-18  | 4.76E-17  | Retinol dehydrogenase 11; similar with RDH11_MOUSE                                 |
| Px004843.1 | 1.8517 | 8.05E-08  | 3.11E-07  | ORF; similar with Q8I7Q1_DROME                                                     |
| Px009920.1 | 1.8428 | 8.21E-15  | 4.67E-14  | Branched-chain-amino-acid aminotransferase, mitochondrial                          |
| Px000647.3 | 1.8232 | 6.21E-280 | 2.49E-278 | UDP-glucuronosyltransferase 2B7; similar with UD2B7_HUMAN                          |
| Px010831.1 | 1.8205 | 7.51E-09  | 3.13E-08  | Luciferin 4-monooxygenase; similar with LUCI_PHOPE                                 |
| Px017172.1 | 1.8142 | 5.10E-12  | 2.56E-11  | Serine palmitoyltransferase 1; similar with SPTC1_MOUSE                            |
| Px002968.1 | 1.8131 | 5.34E-41  | 5.58E-40  | Adenylate kinase isoenzyme 1; similar with KAD1_CHICK                              |
| Px007409.1 | 1.8110 | 8.48E-30  | 7.38E-29  | Succinate dehydrogenase [ubiquinone] iron-sulfur subunit, mitochondrial            |
| Px018019.1 | 1.8031 | 1.95E-05  | 6.12E-05  | Putative uncharacterized protein; similar with E2ARC4_9HYME                        |
| Px008606.3 | 1.8031 | 1.95E-05  | 6.12E-05  | Gamma-interferon-inducible lysosomal thiol reductase                               |
| Px009194.1 | 1.8005 | 8.55E-179 | 2.46E-177 | Dihydropteridine reductase; similar with DHPR_RAT                                  |
| Px003540.1 | 1.7898 | 3.78E-38  | 3.78E-37  | Hexokinase type 2; similar with HXK2_DROME                                         |
| Px004684.1 | 1.7858 | 0.00E+00  | 0.00E+00  | Tyrosine 3-monooxygenase; similar with TY3H_DROME                                  |
| Px011697.1 | 1.7841 | 4.24E-28  | 3.56E-27  | Bifunctional methylenetetrahydrofolate dehydrogenase/cyclohydrolase, mitochondrial |
| Px011727.1 | 1.7734 | 6.73E-64  | 9.35E-63  | Protein GCY; similar with GCY_YEAST                                                |
| Px002295.1 | 1.7684 | 0.00E+00  | 0.00E+00  | Pancreatic lipase-related protein 2; similar with LIPR2_BOVIN                      |
| Px015449.1 | 1.7626 | 1.93E-12  | 9.88E-12  | Acetyl-CoA carboxylase 1; similar with ACACA_SHEEP                                 |
| Px000123.1 | 1.7598 | 0.00E+00  | 0.00E+00  | Putative aldehyde dehydrogenase family 7 member A1 homolog                         |
| Px003753.1 | 1.7587 | 0.00E+00  | 0.00E+00  | Membrane alanyl aminopeptidase; similar with AMPM_HELVI                            |
| Px017680.3 | 1.7524 | 1.24E-28  | 1.06E-27  | CaiB/baiF CoA-transferase family protein C7orf10 homolog                           |
| Px011641.3 | 1.7499 | 0.00E+00  | 0.00E+00  | Vanin-like protein 2; similar with VNNL2_DROME                                     |
| Px014078.1 | 1.7425 | 5.92E-30  | 5.19E-29  | Fructose-bisphosphate aldolase; similar with ALF_DROME                             |
| Px014054.1 | 1.7402 | 9.14E-05  | 2.66E-04  | Retrovirus-related Pol polyprotein from transposon 297                             |
| Px002071.1 | 1.7379 | 9.28E-30  | 8.06E-29  | Beta-1,3-galactosyltransferase 5; similar with B3GT5_HUMAN                         |
| Px010260.3 | 1.7301 | 6.29E-25  | 4.87E-24  | Alcohol dehydrogenase [NADP+] A; similar with A1A1A_DANRE                          |
| Px011755.1 | 1.7284 | 1.92E-39  | 1.96E-38  | Antennal esterase CXE4; similar with D3GDL5_SPOLI                                  |
| Px000957.1 | 1.7245 | 2.09E-58  | 2.70E-57  | Putative lipoyltransferase 2, mitochondrial                                        |
| Px011476.1 | 1.7230 | 8.10E-19  | 5.34E-18  | Lipase 3; similar with LIP3_DROME                                                  |
| Px009343.1 | 1.7147 | 2.39E-06  | 8.20E-06  | NADH-ubiquinone oxidoreductase 75 kDa subunit, mitochondrial                       |
| Px005070.1 | 1.7143 | 1.14E-73  | 1.74E-72  | Glucose 1-dehydrogenase 2; similar with DHG2_BACME                                 |
| Px011320.1 | 1.7053 | 2.69E-04  | 7.34E-04  | Cytochrome b-c1 complex subunit Rieske, mitochondrial                              |
| Px009518.1 | 1.6962 | 4.26E-05  | 1.29E-04  | Allantoicase; similar with ALLC_DANRE                                              |
| Px008134.5 | 1.6910 | 0.00E+00  | 0.00E+00  | Glucose dehydrogenase [acceptor]; similar with DHGL_DROME                          |
| Px001113.1 | 1.6873 | 1.59E-11  | 7.83E-11  | Ecdysteroid UDP-glucosyltransferase; similar with UDPE_NPVSL                       |
| Px008154.1 | 1.6773 | 3.06E-26  | 2.46E-25  | Alpha-1,6-mannosyl-glycoprotein 2-beta-N-acetylglucosaminyltransferase             |
| Px007305.1 | 1.6562 | 9.37E-42  | 9.88E-41  | C-1-tetrahydrofolate synthase, cytoplasmic                                         |

|            |        |           |           |                                                                   |
|------------|--------|-----------|-----------|-------------------------------------------------------------------|
| Px004798.2 | 1.6515 | 1.57E-68  | 2.27E-67  | Malate dehydrogenase, mitochondrial; similar with MDHM_PONAB      |
| Px003712.1 | 1.6490 | 1.05E-19  | 7.17E-19  | Acetylcholinesterase; similar with ACES_CULPI                     |
| Px001047.1 | 1.6266 | 1.35E-135 | 3.11E-134 | Heat shock protein 67B2; similar with HS6B_DROME                  |
| Px003251.1 | 1.6237 | 1.02E-19  | 6.98E-19  | Putative cuticle protein; similar with C0H6E8_BOMMO               |
| Px017997.1 | 1.6216 | 3.59E-04  | 9.62E-04  | Esterase FE4; similar with ESTF_MYZPE                             |
| Px004065.1 | 1.6192 | 1.53E-09  | 6.71E-09  | Mannosyl-oligosaccharide alpha-1,2-mannosidase isoform A          |
| Px016278.1 | 1.6052 | 1.76E-11  | 8.64E-11  | Cytoplasmic aconitate hydratase; similar with ACOC_MOUSE          |
| Px004310.2 | 1.5938 | 1.11E-09  | 4.89E-09  | Probable trans-2-enoyl-CoA reductase, mitochondrial               |
| Px004643.1 | 1.5882 | 6.58E-06  | 2.17E-05  | Cytochrome P450 6B6; similar with CP6B6_HELAM                     |
| Px000132.1 | 1.5866 | 3.04E-79  | 4.87E-78  | FGGY carbohydrate kinase domain-containing protein                |
| Px011340.1 | 1.5860 | 0.00E+00  | 0.00E+00  | Non-specific lipid-transfer protein; similar with NLTP_CHICK      |
| Px016731.1 | 1.5768 | 2.81E-27  | 2.33E-26  | Acyl-CoA synthetase family member 3, mitochondrial                |
| Px015306.1 | 1.5761 | 1.08E-11  | 5.34E-11  | 1,2-dihydroxy-3-keto-5-methylthiopentene dioxygenase              |
| Px017275.1 | 1.5732 | 4.40E-10  | 1.99E-09  | Inositol monophosphatase 3; similar with IMPA3_DANRE              |
| Px001531.1 | 1.5708 | 7.84E-60  | 1.04E-58  | Probable peroxisomal acyl-coenzyme A oxidase 1                    |
| Px016564.1 | 1.5653 | 3.09E-27  | 2.55E-26  | Hydroxyacyl-coenzyme A dehydrogenase, mitochondrial               |
| Px009165.1 | 1.5540 | 5.35E-37  | 5.25E-36  | Retinol dehydrogenase 14; similar with RDH14_MOUSE                |
| Px008706.2 | 1.5512 | 3.40E-05  | 1.04E-04  | WW domain-containing oxidoreductase                               |
| Px012743.1 | 1.5433 | 6.47E-14  | 3.55E-13  | Probable dolichol-phosphate mannosyltransferase                   |
| Px014172.1 | 1.5367 | 3.01E-07  | 1.11E-06  | Heparanase; similar with HPSE_BOVIN                               |
| Px010498.1 | 1.5315 | 2.77E-59  | 3.62E-58  | Fumarylacetoacetate hydrolase domain-containing protein 2         |
| Px002990.1 | 1.5298 | 2.84E-05  | 8.78E-05  | LINE-1 reverse transcriptase homolog; similar with LIN1_NYCCO     |
| Px001106.1 | 1.5290 | 1.97E-08  | 7.95E-08  | Protein retinal degeneration B; similar with RDGB_DROME           |
| Px013958.1 | 1.5211 | 6.83E-145 | 1.68E-143 | Cytochrome P450 6k1; similar with CP6K1_BLAGE                     |
| Px007047.2 | 1.5134 | 9.55E-05  | 2.77E-04  | Probable peroxisomal acyl-coenzyme A oxidase 1                    |
| Px016262.1 | 1.5084 | 3.45E-19  | 2.30E-18  | Cysteine sulfinic acid decarboxylase; similar with CSAD_HUMAN     |
| Px007772.1 | 1.5076 | 2.80E-66  | 3.96E-65  | Esterase B1; similar with EST1_CULPI                              |
| Px014702.1 | 1.5035 | 1.75E-04  | 4.92E-04  | Lysine-specific demethylase 8; similar with KDM8_RAT              |
| Px008849.1 | 1.5018 | 7.18E-50  | 8.45E-49  | Myosinase 1; similar with MYRO1_BREBR                             |
| Px016066.1 | 1.4923 | 1.12E-13  | 6.06E-13  | Lipase member M; similar with LIPM_MOUSE                          |
| Px006995.1 | 1.4923 | 7.94E-05  | 2.33E-04  | Polypeptide N-acetylgalactosaminyltransferase 1                   |
| Px004945.1 | 1.4848 | 1.39E-157 | 3.62E-156 | Protein henna; similar with PH4H_DROME                            |
| Px011686.1 | 1.4813 | 2.69E-20  | 1.86E-19  | 5-formyltetrahydrofolate cyclo-ligase; similar with MTHFS_HUMAN   |
| Px016493.1 | 1.4751 | 2.83E-29  | 2.43E-28  | Luciferin 4-monooxygenase; similar with LUC1_LUCMI                |
| Px011550.1 | 1.4749 | 3.05E-11  | 1.48E-10  | Glycerate kinase; similar with GLCTK_RAT                          |
| Px011338.1 | 1.4635 | 5.55E-12  | 2.79E-11  | GTP cyclohydrolase 1; similar with GCH1_DROME                     |
| Px014982.1 | 1.4635 | 0.00E+00  | 0.00E+00  | Probable cytochrome P450 9f2; similar with CP9F2_DROME            |
| Px000965.1 | 1.4634 | 3.13E-36  | 3.03E-35  | D-amino-acid oxidase 2; similar with OXDA2_CAEEL                  |
| Px009184.1 | 1.4536 | 6.85E-11  | 3.26E-10  | Adenosine deaminase-like protein; similar with ADAL_BOVIN         |
| Px013203.1 | 1.4517 | 2.86E-06  | 9.77E-06  | UDP-glucuronosyltransferase 2B2; similar with UD2B2_RAT           |
| Px008269.1 | 1.4462 | 9.77E-33  | 8.96E-32  | Chondroitin sulfate synthase 1; similar with CHSS1_MOUSE          |
| Px016080.1 | 1.4117 | 3.08E-05  | 9.48E-05  | Glucosamine-6-phosphate isomerase; similar with GNPI_AEDAE        |
| Px011844.1 | 1.4117 | 3.08E-05  | 9.48E-05  | Adenylate kinase 7; similar with KAD7_MOUSE                       |
| Px011611.1 | 1.4113 | 0.00E+00  | 0.00E+00  | Probable enoyl-CoA hydratase, mitochondrial                       |
| Px006720.1 | 1.4070 | 1.32E-07  | 5.02E-07  | Glycerol-3-phosphate acyltransferase 4                            |
| Px009407.1 | 1.4048 | 3.00E-27  | 2.47E-26  | Glycoprotein-N-acetylgalactosamine 3-beta-galactosyltransferase 1 |
| Px013538.1 | 1.4047 | 8.56E-19  | 5.64E-18  | 2-oxoglutarate dehydrogenase, mitochondrial                       |
| Px017196.1 | 1.3834 | 3.80E-22  | 2.75E-21  | Choline/ethanolamine kinase; similar with CHKB_HUMAN              |
| Px001847.1 | 1.3803 | 1.09E-180 | 3.16E-179 | Aminoacylase-1; similar with ACY1_MOUSE                           |
| Px001370.1 | 1.3780 | 6.09E-19  | 4.04E-18  | Aminoacylase-1; similar with ACY1_MOUSE                           |
| Px015891.1 | 1.3621 | 4.81E-87  | 8.23E-86  | Peroxidase; similar with PERO_DROME                               |
| Px015301.3 | 1.3558 | 5.98E-18  | 3.81E-17  | V-type proton ATPase subunit S1; similar with VAS1_MOUSE          |
| Px009798.1 | 1.3537 | 1.57E-40  | 1.63E-39  | Aminoacylase-1A; similar with ACY1A_RAT                           |
| Px010161.1 | 1.3476 | 3.12E-26  | 2.50E-25  | GTP cyclohydrolase 1; similar with GCH1_DROME                     |

|            |        |           |           |                                                               |
|------------|--------|-----------|-----------|---------------------------------------------------------------|
| Px000763.1 | 1.3380 | 2.84E-09  | 1.22E-08  | Acetyl-CoA carboxylase; similar with ACAC_CHICK               |
| Px003338.1 | 1.3380 | 2.84E-09  | 1.22E-08  | ATP synthase subunit d, mitochondrial                         |
| Px012027.3 | 1.3347 | 9.75E-93  | 1.73E-91  | Protein 5NUC; similar with 5NTD_LUTLO                         |
| Px009776.1 | 1.3252 | 2.34E-08  | 9.36E-08  | Mevalonate kinase; similar with KIME_DICDI                    |
| Px004571.1 | 1.3081 | 2.26E-185 | 6.68E-184 | Aldose reductase; similar with ALDR_BOVIN                     |
| Px016456.1 | 1.3048 | 0.00E+00  | 0.00E+00  | Lambda-crystallin homolog; similar with CRYL1_HUMAN           |
| Px008217.3 | 1.3035 | 8.78E-09  | 3.64E-08  | Phosphatidylinositol 4,5-bisphosphate 5-phosphatase A         |
| Px015448.1 | 1.2854 | 3.01E-05  | 9.28E-05  | Acetyl-CoA carboxylase; similar with ACAC_CHICK               |
| Px016834.1 | 1.2833 | 2.58E-98  | 4.76E-97  | Probable 3-hydroxyacyl-CoA dehydrogenase B0272.3              |
| Px016733.1 | 1.2758 | 1.82E-09  | 7.92E-09  | Acyl-CoA synthetase family member 3, mitochondrial            |
| Px006848.1 | 1.2745 | 1.88E-14  | 1.05E-13  | UDP-glucose 6-dehydrogenase; similar with UGDH_DROME          |
| Px006311.1 | 1.2734 | 4.37E-18  | 2.80E-17  | Chorion peroxidase; similar with PERC_ANOGA                   |
| Px002115.1 | 1.2726 | 1.76E-36  | 1.71E-35  | 5-formyltetrahydrofolate cyclo-ligase                         |
| Px006292.1 | 1.2679 | 2.20E-13  | 1.18E-12  | Ecdysteroid UDP-glucosyltransferase; similar with UDPE_NPVSL  |
| Px001937.2 | 1.2673 | 3.55E-115 | 7.31E-114 | Phosphatidate phosphatase LPIN2; similar with LPIN2_MOUSE     |
| Px003365.1 | 1.2639 | 2.20E-57  | 2.82E-56  | Luciferin 4-monooxygenase; similar with LUCI_PHOPE            |
| Px000372.1 | 1.2617 | 2.59E-11  | 1.26E-10  | Putative gamma-glutamyltransferase ywrD                       |
| Px013936.1 | 1.2531 | 1.39E-28  | 1.18E-27  | 3-ketoacyl-CoA thiolase, mitochondrial                        |
| Px012993.1 | 1.2368 | 4.80E-99  | 8.92E-98  | Multifunctional protein ADE2; similar with PUR6_DROME         |
| Px006054.1 | 1.2358 | 6.60E-273 | 2.59E-271 | Myrosinase 1; similar with MYRO1_BREBR                        |
| Px014795.1 | 1.2270 | 4.25E-09  | 1.81E-08  | 5'-nucleotidase; similar with 5NTD_DISOM                      |
| Px017253.1 | 1.2169 | 4.53E-37  | 4.47E-36  | Cytochrome P450 6B2; similar with CP6B2_HELAM                 |
| Px011707.1 | 1.2143 | 2.86E-35  | 2.71E-34  | Amidophosphoribosyltransferase; similar with PUR1_DROME       |
| Px007055.2 | 1.2138 | 3.00E-67  | 4.29E-66  | Branched-chain-amino-acid aminotransferase, cytosolic         |
| Px001867.3 | 1.2132 | 1.80E-11  | 8.86E-11  | AMP deaminase 2; similar with AMPD2_HUMAN                     |
| Px012198.1 | 1.2125 | 2.46E-68  | 3.54E-67  | Fatty acid synthase; similar with FAS_RAT                     |
| Px017168.1 | 1.2122 | 2.42E-07  | 9.06E-07  | Iron/zinc purple acid phosphatase-like protein                |
| Px011286.1 | 1.2119 | 8.71E-219 | 2.89E-217 | Glutaryl-CoA dehydrogenase, mitochondrial                     |
| Px002733.2 | 1.2093 | 0.00E+00  | 0.00E+00  | Aldehyde dehydrogenase, dimeric NADP-preferring               |
| Px002532.1 | 1.2056 | 1.34E-124 | 2.93E-123 | Peroxidasin; similar with PXDN_DROME                          |
| Px002690.2 | 1.1998 | 1.95E-17  | 1.22E-16  | Dolichol kinase; similar with DOLK_MOUSE                      |
| Px010938.1 | 1.1997 | 2.45E-12  | 1.25E-11  | 2-oxo-4-hydroxy-4-carboxy-5-ureidoimidazoline decarboxylase   |
| Px000039.1 | 1.1965 | 1.40E-231 | 4.93E-230 | UDP-glucuronosyltransferase 1-8; similar with UD18_RAT        |
| Px003013.3 | 1.1926 | 3.26E-165 | 8.82E-164 | Lipoyltransferase 1, mitochondrial; similar with LIPT_MOUSE   |
| Px001933.1 | 1.1912 | 1.41E-09  | 6.20E-09  | Myrosinase 1; similar with MYRO1_BREBR                        |
| Px005839.1 | 1.1906 | 1.80E-18  | 1.17E-17  | Mannosyl-oligosaccharide alpha-1,2-mannosidase isoform A      |
| Px010887.1 | 1.1902 | 3.16E-21  | 2.24E-20  | Phosphoenolpyruvate carboxykinase [GTP]                       |
| Px001894.8 | 1.1880 | 5.51E-25  | 4.27E-24  | Ethanolamine-phosphate cytidyltransferase                     |
| Px009877.1 | 1.1833 | 6.80E-08  | 2.64E-07  | Ferrochelatase, mitochondrial; similar with HEMH_DROME        |
| Px000954.1 | 1.1823 | 1.17E-74  | 1.80E-73  | Succinyl-CoA ligase [GDP-forming] subunit beta, mitochondrial |
| Px012054.1 | 1.1758 | 3.79E-12  | 1.91E-11  | Unknown functio                                               |
| Px001224.1 | 1.1741 | 3.07E-05  | 9.43E-05  | Maleylacetoacetate isomerase; similar with MAAI_MOUSE         |
| Px006815.1 | 1.1714 | 0.00E+00  | 0.00E+00  | Regucalcin; similar with RGN_DANRE                            |
| Px009624.5 | 1.1652 | 5.53E-155 | 1.42E-153 | Peroxisomal multifunctional enzyme type 2                     |
| Px003966.1 | 1.1609 | 1.72E-15  | 1.01E-14  | Tubulin polyglutamylase ttl6; similar with TTL6_DANRE         |
| Px006643.3 | 1.1605 | 8.63E-35  | 8.15E-34  | Luciferin 4-monooxygenase; similar with LUCI_LUCMI            |
| Px012467.1 | 1.1592 | 1.77E-09  | 7.71E-09  | GTP:AMP phosphotransferase, mitochondrial                     |
| Px013246.1 | 1.1587 | 3.16E-98  | 5.83E-97  | Dehydrogenase/reductase SDR family member 4                   |
| Px000720.1 | 1.1574 | 2.24E-12  | 1.15E-11  | Galactokinase; similar with GALK1_HUMAN                       |
| Px004131.5 | 1.1474 | 6.20E-26  | 4.92E-25  | Calcium-independent phospholipase A2-gamma                    |
| Px010099.1 | 1.1453 | 2.76E-19  | 1.85E-18  | Phospholipase D1; similar with PLD1_RAT                       |
| Px011987.1 | 1.1403 | 4.97E-07  | 1.81E-06  | Amine oxidase [flavin-containing] B; similar with AOFB_MOUSE  |
| Px001164.1 | 1.1390 | 6.83E-117 | 1.42E-115 | UDP-glucuronosyltransferase; similar with UGT3_PLEPL          |
| Px009675.1 | 1.1334 | 1.86E-96  | 3.40E-95  | UDP-glucuronosyltransferase 1-2; similar with UD12_MOUSE      |

|            |         |           |           |                                                                               |
|------------|---------|-----------|-----------|-------------------------------------------------------------------------------|
| Px011027.1 | 1.1279  | 4.95E-11  | 2.37E-10  | ORF; similar with Q8I7Q1_DROME                                                |
| Px015376.1 | 1.1200  | 1.05E-146 | 2.61E-145 | Phosphoenolpyruvate carboxykinase [GTP]; similar with PCKG_DROME              |
| Px015080.1 | 1.1199  | 3.36E-06  | 1.14E-05  | Ecdysteroid UDP-glucosyltransferase; similar with UDPE_NPVMB                  |
| Px002044.1 | 1.1191  | 1.32E-04  | 3.76E-04  | Phosphatidylinositol 3-kinase catalytic subunit type 3                        |
| Px007883.1 | 1.1153  | 4.95E-21  | 3.49E-20  | Probable medium-chain specific acyl-CoA dehydrogenase, mitochondrial          |
| Px005106.1 | 1.1107  | 1.62E-25  | 1.28E-24  | Aminopeptidase N; similar with AMPN_CHICK                                     |
| Px000042.3 | 1.1085  | 4.45E-27  | 3.66E-26  | Alcohol dehydrogenase [NADP+]; similar with AK1A1_BOVIN                       |
| Px003316.1 | 1.0981  | 0.00E+00  | 0.00E+00  | C-1-tetrahydrofolate synthase, cytoplasmic; similar with C1TC_SPOFR           |
| Px005939.1 | 1.0952  | 5.25E-05  | 1.58E-04  | ORF; similar with Q8I7Q1_DROME                                                |
| Px004129.1 | 1.0899  | 9.10E-17  | 5.57E-16  | Putative ferric-chelate reductase 1 homolog; similar with FRRS1_DROME         |
| Px008244.2 | 1.0882  | 5.98E-89  | 1.04E-87  | Sialic acid synthase; similar with SIAS_HUMAN                                 |
| Px009265.1 | 1.0812  | 1.04E-17  | 6.55E-17  | Sepiapterin reductase; similar with SPRE_XENTR                                |
| Px016558.1 | 1.0773  | 3.20E-04  | 8.66E-04  | Putative glycerol kinase 5; similar with GLPK5_DANRE                          |
| Px005900.1 | 1.0773  | 1.30E-16  | 7.94E-16  | Cytochrome P450 6B2; similar with CP6B2_HELAM                                 |
| Px002103.1 | 1.0773  | 2.09E-05  | 6.54E-05  | Dolichol-phosphate mannosyltransferase subunit 3                              |
| Px000764.1 | 1.0743  | 4.55E-43  | 4.88E-42  | Acetyl-CoA carboxylase; similar with ACAC_CHICK                               |
| Px007394.2 | 1.0691  | 1.25E-39  | 1.29E-38  | Peroxidasin homolog; similar with PXDN_MOUSE                                  |
| Px006816.1 | 1.0638  | 0.00E+00  | 0.00E+00  | 2-oxoisovalerate dehydrogenase subunit alpha, mitochondrial                   |
| Px011285.1 | 1.0624  | 2.26E-250 | 8.22E-249 | UDP-glucuronosyltransferase 2B4; similar with UD2B4_HUMAN                     |
| Px000825.3 | 1.0612  | 4.33E-28  | 3.63E-27  | Ferrochelatase, mitochondrial; similar with HEMH_DROME                        |
| Px004924.1 | 1.0611  | 3.58E-05  | 1.09E-04  | Polypeptide N-acetylgalactosaminyltransferase 3                               |
| Px013239.1 | 1.0562  | 3.46E-07  | 1.28E-06  | Putative glycerol kinase 3; similar with GLPK3_HUMAN                          |
| Px008638.1 | 1.0552  | 4.56E-37  | 4.49E-36  | Thioredoxin domain-containing protein 17; similar with TXD17_PONAB            |
| Px016756.1 | 1.0544  | 4.92E-12  | 2.48E-11  | Cytoplasmic aconitate hydratase; similar with ACOC_HUMAN                      |
| Px015569.1 | 1.0487  | 2.19E-22  | 1.60E-21  | 3-oxoacyl-[acyl-carrier-protein] reductase FabG                               |
| Px012098.2 | 1.0475  | 2.15E-05  | 6.71E-05  | Lipase member I; similar with LIPI_HUMAN                                      |
| Px012834.1 | 1.0441  | 9.14E-32  | 8.21E-31  | Phosphopantothenate--cysteine ligase; similar with PPCS_HUMAN                 |
| Px011757.1 | 1.0401  | 5.69E-11  | 2.72E-10  | Esterase FE4; similar with ESTF_MYZPE                                         |
| Px011708.1 | 1.0393  | 3.52E-26  | 2.82E-25  | Amidophosphoribosyltransferase; similar with PUR1_DROME                       |
| Px016062.1 | 1.0391  | 1.04E-10  | 4.90E-10  | Prostamide/prostaglandin F synthase; similar with PGFS_RAT                    |
| Px007493.1 | 1.0389  | 5.06E-106 | 9.92E-105 | Delta-1-pyrroline-5-carboxylate synthase; similar with P5CS_PONAB             |
| Px016651.3 | 1.0381  | 6.93E-06  | 2.28E-05  | Polypeptide N-acetylgalactosaminyltransferase 5                               |
| Px013730.1 | 1.0378  | 8.17E-18  | 5.18E-17  | Myrosinase 1; similar with MYRO1_BREBR                                        |
| Px004354.1 | 1.0356  | 2.73E-18  | 1.76E-17  | UDP-N-acetylhexosamine pyrophosphorylase-like protein                         |
| Px003748.1 | 1.0252  | 1.80E-24  | 1.37E-23  | Sphingosine-1-phosphate lyase; similar with SGPL_DROME                        |
| Px010631.1 | 1.0225  | 2.51E-26  | 2.02E-25  | Sphingomyelin phosphodiesterase; similar with ASM_HUMAN                       |
| Px005056.1 | 1.0223  | 1.78E-132 | 4.01E-131 | V-type proton ATPase subunit e 2; similar with VA0E2_HUMAN                    |
| Px008837.1 | 1.0217  | 1.55E-94  | 2.77E-93  | Long-chain-fatty-acid--CoA ligase ACSBG2; similar with ACBG2_XENLA            |
| Px010263.1 | 1.0192  | 2.96E-04  | 8.05E-04  | Probable methylmalonate-semialdehyde dehydrogenase [acylating], mitochondrial |
| Px001460.1 | 1.0189  | 4.64E-14  | 2.57E-13  | Alpha-N-acetylglucosaminidase; similar with ANAG_HUMAN                        |
| Px015217.1 | 1.0179  | 5.90E-29  | 5.04E-28  | 4-aminobutyrate aminotransferase, mitochondrial; similar with GABT_PIG        |
| Px012551.1 | 1.0171  | 6.11E-09  | 2.57E-08  | Uncharacterized protein R102.4; similar with YF64_CAEEL                       |
| Px014822.1 | 1.0107  | 6.18E-81  | 1.00E-79  | 3-ketoacyl-CoA thiolase, mitochondrial; similar with THIM_HUMAN               |
| Px013693.1 | 1.0094  | 5.72E-08  | 2.23E-07  | Aldehyde oxidase; similar with ADO_HUMAN                                      |
| Px003215.1 | 1.0078  | 3.27E-10  | 1.49E-09  | N-acetyllactosaminide beta-1,3-N-acetylglucosaminyltransferase                |
| Px015882.1 | 1.0071  | 2.32E-110 | 4.67E-109 | Alcohol dehydrogenase [NADP+] A; similar with A1A1A_DANRE                     |
| Px010660.1 | 1.0065  | 4.71E-17  | 2.92E-16  | Probable general secretion pathway protein D; similar with GSPD_ECOLI         |
| Px009169.1 | 1.0057  | 5.15E-06  | 1.71E-05  | Myrosinase 1; similar with MYRO1_BREBR                                        |
| Px004525.4 | 1.0036  | 2.33E-16  | 1.41E-15  | Glyoxylate reductase/hydroxypyruvate reductase                                |
| Px013169.1 | 1.0023  | 2.92E-07  | 1.09E-06  | Lactase-phlorizin hydrolase; similar with LPH_HUMAN                           |
| Px002054.1 | -9.5448 | 1.78E-04  | 4.98E-04  | Uncharacterized oxidoreductase MexAM1_META1p0182                              |
| Px017388.1 | -8.2367 | 1.78E-04  | 4.99E-04  | Neither inactivation nor afterpotential protein G                             |
| Px000980.1 | -3.3822 | 3.42E-05  | 1.05E-04  | Catalase; similar with CATA_PONAB                                             |
| Px005914.1 | -2.5077 | 1.83E-04  | 5.12E-04  | Putative uncharacterized protein; similar with D6WG00_TRICA                   |

|            |         |           |           |                                                                         |
|------------|---------|-----------|-----------|-------------------------------------------------------------------------|
| Px016811.1 | -2.2109 | 3.61E-99  | 6.74E-98  | Retrovirus-related Pol polyprotein LINE-1; similar with POL2_MOUSE      |
| Px006540.1 | -2.1451 | 2.18E-04  | 6.03E-04  | ACYPI009600 protein; similar with C4WT25_ACYPI                          |
| Px009473.1 | -2.1154 | 2.05E-08  | 8.25E-08  | DNA-directed RNA polymerases I, II, and III subunit RPABC3              |
| Px002199.1 | -2.0641 | 1.94E-17  | 1.22E-16  | 4-coumarate--CoA ligase-like 5; similar with 4CLL5_ARATH                |
| Px007377.1 | -1.9772 | 8.53E-07  | 3.05E-06  | Glucose 1-dehydrogenase 1; similar with DHG1_BACME                      |
| Px006557.1 | -1.7301 | 1.15E-06  | 4.05E-06  | Ribonucleoside-diphosphate reductase small chain                        |
| Px009302.2 | -1.5524 | 1.01E-125 | 2.21E-124 | Putative uncharacterized protein; similar with D7GYL0_TRICA             |
| Px015198.2 | -1.5238 | 2.14E-20  | 1.48E-19  | NADH dehydrogenase [ubiquinone] 1 alpha subcomplex subunit 8            |
| Px017708.4 | -1.4493 | 1.01E-40  | 1.05E-39  | Long-chain-fatty-acid--CoA ligase 1; similar with ACSL1_RAT             |
| Px010117.1 | -1.3859 | 3.21E-207 | 1.02E-205 | Asparagine synthetase [glutamine-hydrolyzing]; similar with ASNS_RAT    |
| Px007720.1 | -1.3396 | 2.40E-31  | 2.14E-30  | Catalase; similar with CATA_GLARU                                       |
| Px004229.1 | -1.2823 | 8.45E-31  | 7.47E-30  | Retrovirus-related Pol polyprotein LINE-1; similar with POL2_MOUSE      |
| Px005654.1 | -1.2576 | 5.56E-25  | 4.31E-24  | DNA-directed RNA polymerase III subunit RPC4                            |
| Px013191.1 | -1.2294 | 5.69E-11  | 2.72E-10  | Aromatic-L-amino-acid decarboxylase; similar with DDC_RAT               |
| Px007031.1 | -1.2120 | 0.00E+00  | 0.00E+00  | Basic juvenile hormone-suppressible protein 2; similar with BJSB2_TRINI |
| Px017624.1 | -1.2048 | 5.92E-12  | 2.97E-11  | DNA-directed RNA polymerase I subunit RPA2                              |
| Px012350.1 | -1.2045 | 5.28E-49  | 6.14E-48  | Ribonucleoside-diphosphate reductase large subunit                      |
| Px002394.3 | -1.1661 | 5.87E-70  | 8.60E-69  | D-beta-hydroxybutyrate dehydrogenase, mitochondrial                     |
| Px010954.1 | -1.1513 | 1.34E-08  | 5.50E-08  | Probable DNA-directed RNA polymerases I and III subunit RPAC2           |
| Px012461.1 | -1.1191 | 1.86E-13  | 9.95E-13  | Lethal(2)neighbour of tid protein; similar with NT56_DROME              |
| Px009682.1 | -1.0521 | 0.00E+00  | 0.00E+00  | Cytochrome c oxidase subunit 6A1, mitochondrial                         |
| Px001485.1 | -1.0439 | 1.14E-09  | 5.04E-09  | Putative 115 kDa protein in type-1 retrotransposable element R1DM       |
| Px012289.1 | -1.0288 | 3.16E-06  | 1.07E-05  | Liver carboxylesterase; similar with EST1_MESAU                         |
| Px004110.1 | -1.0281 | 8.36E-07  | 2.99E-06  | Aldose reductase; similar with ALDR_RABIT                               |
| Px012716.1 | -1.0128 | 4.03E-70  | 5.92E-69  | Proline dehydrogenase 1, mitochondrial; similar with PROD_DROME         |
| Px013099.1 | -1.0105 | 3.25E-117 | 6.80E-116 | Unknown functio                                                         |
| Px006040.1 | -1.0062 | 1.31E-04  | 3.75E-04  | RNA-directed DNA polymerase from mobile element jockey                  |

### Involved in metabolism of xenobiotics by cytochrome P450

|            |         |           |           |                                                                  |
|------------|---------|-----------|-----------|------------------------------------------------------------------|
| Px009293.1 | 11.1045 | 9.55E-06  | 3.10E-05  | Probable cytochrome P450 304a1; similar with CP304_DROME         |
| Px013527.1 | 10.4804 | 7.08E-09  | 2.96E-08  | Carbonyl reductase [NADPH] 1; similar with CBR1_RABIT            |
| Px009572.1 | 9.2901  | 5.34E-07  | 1.94E-06  | Cytochrome P450 6B1; similar with CP6B1_PAPPO                    |
| Px007386.1 | 4.0773  | 1.56E-08  | 6.32E-08  | Carbonyl reductase [NADPH] 1; similar with CBR1_PIG              |
| Px002723.1 | 2.9848  | 0.00E+00  | 0.00E+00  | Cytochrome P450 6B7; similar with CP6B7_HELAM                    |
| Px014883.1 | 2.5298  | 7.38E-32  | 6.64E-31  | Ecdysteroid UDP-glucosyltransferase; similar with UDPE_NPVSL     |
| Px013884.1 | 2.4758  | 5.37E-18  | 3.43E-17  | Probable cytochrome P450 9f2; similar with CP9F2_DROME           |
| Px009900.2 | 2.4751  | 2.96E-29  | 2.55E-28  | Microsomal glutathione S-transferase 1; similar with MGST1_HUMAN |
| Px015266.1 | 2.4663  | 4.55E-17  | 2.83E-16  | Glutathione S-transferase omega-1; similar with GSTO1_HUMAN      |
| Px014981.1 | 2.4259  | 0.00E+00  | 0.00E+00  | Cytochrome P450 9e2; similar with CP9E2_BLAGE                    |
| Px015631.1 | 2.2963  | 1.88E-38  | 1.89E-37  | Glutathione S-transferase 1; similar with GSTT1_MUSDO            |
| Px005902.4 | 2.1318  | 2.80E-119 | 5.89E-118 | Cytochrome P450 6B6; similar with CP6B6_HELAM                    |
| Px004854.1 | 2.1011  | 1.06E-15  | 6.27E-15  | Ecdysteroid UDP-glucosyltransferase; similar with UDPE_NPVSL     |
| Px014216.1 | 1.9094  | 1.32E-40  | 1.38E-39  | Cytochrome P450 6B6; similar with CP6B6_HELAM                    |
| Px000872.2 | 1.8756  | 1.82E-09  | 7.93E-09  | Ecdysteroid UDP-glucosyltransferase; similar with UDPE_NPVSL     |
| Px000647.3 | 1.8232  | 6.21E-280 | 2.49E-278 | UDP-glucuronosyltransferase 2B7; similar with UD2B7_HUMAN        |
| Px011727.1 | 1.7734  | 6.73E-64  | 9.35E-63  | Protein GCY; similar with GCY_YEAST                              |
| Px001113.1 | 1.6873  | 1.59E-11  | 7.83E-11  | Ecdysteroid UDP-glucosyltransferase; similar with UDPE_NPVSL     |
| Px004643.1 | 1.5882  | 6.58E-06  | 2.17E-05  | Cytochrome P450 6B6; similar with CP6B6_HELAM                    |
| Px013958.1 | 1.5211  | 6.83E-145 | 1.68E-143 | Cytochrome P450 6k1; similar with CP6K1_BLAGE                    |
| Px014982.1 | 1.4635  | 0.00E+00  | 0.00E+00  | Probable cytochrome P450 9f2; similar with CP9F2_DROME           |
| Px013203.1 | 1.4517  | 2.86E-06  | 9.77E-06  | UDP-glucuronosyltransferase 2B2; similar with UD2B2_RAT          |
| Px006106.1 | 1.3067  | 6.05E-183 | 1.77E-181 | Glutathione S-transferase 1; similar with GSTT1_MANSE            |
| Px006292.1 | 1.2679  | 2.20E-13  | 1.18E-12  | Ecdysteroid UDP-glucosyltransferase; similar with UDPE_NPVSL     |
| Px017253.1 | 1.2169  | 4.53E-37  | 4.47E-36  | Cytochrome P450 6B2; similar with CP6B2_HELAM                    |

|            |        |           |           |                                                              |
|------------|--------|-----------|-----------|--------------------------------------------------------------|
| Px000039.1 | 1.1965 | 1.40E-231 | 4.93E-230 | UDP-glucuronosyltransferase 1-8; similar with UD18_RAT       |
| Px003005.1 | 1.1775 | 9.24E-16  | 5.47E-15  | Trans-1,2-dihydrobenzene-1,2-diol dehydrogenase              |
| Px015896.1 | 1.1494 | 3.63E-206 | 1.14E-204 | Glutathione S-transferase 1-1; similar with GSTT1_DROME      |
| Px001164.1 | 1.1390 | 6.83E-117 | 1.42E-115 | UDP-glucuronosyltransferase; similar with UGT3_PLEPL         |
| Px009675.1 | 1.1334 | 1.86E-96  | 3.40E-95  | UDP-glucuronosyltransferase 1-2; similar with UD12_MOUSE     |
| Px010078.3 | 1.1245 | 3.16E-85  | 5.30E-84  | Glutathione S-transferase 1; similar with GSTT1_MANSE        |
| Px015080.1 | 1.1199 | 3.36E-06  | 1.14E-05  | Ecdysteroid UDP-glucosyltransferase; similar with UDPE_NPVMB |
| Px005900.1 | 1.0773 | 1.30E-16  | 7.94E-16  | Cytochrome P450 6B2; similar with CP6B2_HELAM                |
| Px011285.1 | 1.0624 | 2.26E-250 | 8.22E-249 | UDP-glucuronosyltransferase 2B4; similar with UD2B4_HUMAN    |
| Px012288.2 | 1.0131 | 1.22E-06  | 4.30E-06  | Glucose-fructose oxidoreductase domain-containing protein 1  |

### Involved in drug metabolism - cytochrome P450

|            |        |           |           |                                                                  |
|------------|--------|-----------|-----------|------------------------------------------------------------------|
| Px009572.1 | 9.2901 | 5.34E-07  | 1.94E-06  | Cytochrome P450 6B1; similar with CP6B1_PAPPO                    |
| Px012208.1 | 3.1992 | 4.12E-29  | 3.54E-28  | Probable flavin-containing monoamine oxidase A                   |
| Px002723.1 | 2.9848 | 0.00E+00  | 0.00E+00  | Cytochrome P450 6B7; similar with CP6B7_HELAM                    |
| Px014883.1 | 2.5298 | 7.38E-32  | 6.64E-31  | Ecdysteroid UDP-glucosyltransferase; similar with UDPE_NPVSL     |
| Px013884.1 | 2.4758 | 5.37E-18  | 3.43E-17  | Probable cytochrome P450 9f2; similar with CP9F2_DROME           |
| Px009900.2 | 2.4751 | 2.96E-29  | 2.55E-28  | Microsomal glutathione S-transferase 1; similar with MGST1_HUMAN |
| Px015266.1 | 2.4663 | 4.55E-17  | 2.83E-16  | Glutathione S-transferase omega-1; similar with GSTO1_HUMAN      |
| Px014981.1 | 2.4259 | 0.00E+00  | 0.00E+00  | Cytochrome P450 9e2; similar with CP9E2_BLAGE                    |
| Px015631.1 | 2.2963 | 1.88E-38  | 1.89E-37  | Glutathione S-transferase 1; similar with GSTT1_MUSDO            |
| Px005902.4 | 2.1318 | 2.80E-119 | 5.89E-118 | Cytochrome P450 6B6; similar with CP6B6_HELAM                    |
| Px004854.1 | 2.1011 | 1.06E-15  | 6.27E-15  | Ecdysteroid UDP-glucosyltransferase; similar with UDPE_NPVSL     |
| Px014216.1 | 1.9094 | 1.32E-40  | 1.38E-39  | Cytochrome P450 6B6; similar with CP6B6_HELAM                    |
| Px000872.2 | 1.8756 | 1.82E-09  | 7.93E-09  | Ecdysteroid UDP-glucosyltransferase; similar with UDPE_NPVSL     |
| Px000647.3 | 1.8232 | 6.21E-280 | 2.49E-278 | UDP-glucuronosyltransferase 2B7; similar with UD2B7_HUMAN        |
| Px001113.1 | 1.6873 | 1.59E-11  | 7.83E-11  | Ecdysteroid UDP-glucosyltransferase; similar with UDPE_NPVSL     |
| Px004643.1 | 1.5882 | 6.58E-06  | 2.17E-05  | Cytochrome P450 6B6; similar with CP6B6_HELAM                    |
| Px013958.1 | 1.5211 | 6.83E-145 | 1.68E-143 | Cytochrome P450 6k1; similar with CP6K1_BLAGE                    |
| Px014982.1 | 1.4635 | 0.00E+00  | 0.00E+00  | Probable cytochrome P450 9f2; similar with CP9F2_DROME           |
| Px013203.1 | 1.4517 | 2.86E-06  | 9.77E-06  | UDP-glucuronosyltransferase 2B2; similar with UD2B2_RAT          |
| Px006106.1 | 1.3067 | 6.05E-183 | 1.77E-181 | Glutathione S-transferase 1; similar with GSTT1_MANSE            |
| Px006292.1 | 1.2679 | 2.20E-13  | 1.18E-12  | Ecdysteroid UDP-glucosyltransferase; similar with UDPE_NPVSL     |
| Px017253.1 | 1.2169 | 4.53E-37  | 4.47E-36  | Cytochrome P450 6B2; similar with CP6B2_HELAM                    |
| Px011620.2 | 1.2137 | 5.39E-29  | 4.60E-28  | Flavin-containing monooxygenase FMO GS-OX3                       |
| Px000039.1 | 1.1965 | 1.40E-231 | 4.93E-230 | UDP-glucuronosyltransferase 1-8; similar with UD18_RAT           |
| Px015896.1 | 1.1494 | 3.63E-206 | 1.14E-204 | Glutathione S-transferase 1-1; similar with GSTT1_DROME          |
| Px011987.1 | 1.1403 | 4.97E-07  | 1.81E-06  | Amine oxidase [flavin-containing] B; similar with AOFB_MOUSE     |
| Px001164.1 | 1.1390 | 6.83E-117 | 1.42E-115 | UDP-glucuronosyltransferase; similar with UGT3_PLEPL             |
| Px009675.1 | 1.1334 | 1.86E-96  | 3.40E-95  | UDP-glucuronosyltransferase 1-2; similar with UD12_MOUSE         |
| Px010078.3 | 1.1245 | 3.16E-85  | 5.30E-84  | Glutathione S-transferase 1; similar with GSTT1_MANSE            |
| Px015080.1 | 1.1199 | 3.36E-06  | 1.14E-05  | Ecdysteroid UDP-glucosyltransferase; similar with UDPE_NPVMB     |
| Px005900.1 | 1.0773 | 1.30E-16  | 7.94E-16  | Cytochrome P450 6B2; similar with CP6B2_HELAM                    |
| Px011285.1 | 1.0624 | 2.26E-250 | 8.22E-249 | UDP-glucuronosyltransferase 2B4; similar with UD2B4_HUMAN        |

### Involved in hematopoietic cell lineage

|            |        |           |           |                                                         |
|------------|--------|-----------|-----------|---------------------------------------------------------|
| Px013761.3 | 9.0724 | 2.99E-08  | 1.19E-07  | Peroxidase; similar with PERO_DROME                     |
| Px010718.1 | 8.1236 | 8.30E-05  | 2.43E-04  | B-cell receptor CD22; similar with CD22_HUMAN           |
| Px001707.1 | 5.4057 | 1.10E-120 | 2.34E-119 | Membrane alanyl aminopeptidase; similar with AMPM_MANSE |
| Px008276.1 | 4.6077 | 0.00E+00  | 0.00E+00  | Membrane alanyl aminopeptidase; similar with AMPM_HELVI |
| Px006617.2 | 3.3534 | 1.05E-31  | 9.40E-31  | Chorion peroxidase; similar with PERC_DROME             |
| Px008277.1 | 3.3443 | 1.09E-141 | 2.62E-140 | Membrane alanyl aminopeptidase; similar with AMPM_MANSE |
| Px007137.2 | 3.1853 | 1.13E-132 | 2.54E-131 | Peroxidase; similar with PERO_DROME                     |
| Px003755.1 | 2.6780 | 0.00E+00  | 0.00E+00  | Membrane alanyl aminopeptidase; similar with AMPM_MANSE |

|            |         |           |           |                                                             |
|------------|---------|-----------|-----------|-------------------------------------------------------------|
| Px000184.1 | 2.5516  | 9.19E-59  | 1.19E-57  | CD9 antigen; similar with CD9_RAT                           |
| Px008866.1 | 2.4968  | 7.39E-17  | 4.55E-16  | Chorion peroxidase; similar with PERC_DROME                 |
| Px006338.1 | 2.4923  | 6.30E-36  | 6.05E-35  | Carboxypeptidase N subunit 2; similar with CPN2_MOUSE       |
| Px001708.1 | 2.3708  | 0.00E+00  | 0.00E+00  | Amino peptidase N; similar with AMPN_PLUXY                  |
| Px001705.1 | 2.3213  | 0.00E+00  | 0.00E+00  | Membrane alanyl amino peptidase; similar with AMPM_MANSE    |
| Px009761.1 | 2.2693  | 1.37E-127 | 3.02E-126 | Plasma glutamate carboxypeptidase; similar with PGCP_XENLA  |
| Px008278.1 | 2.2655  | 4.42E-37  | 4.36E-36  | Membrane alanyl amino peptidase; similar with AMPM_MANSE    |
| Px005645.3 | 2.2566  | 2.97E-11  | 1.44E-10  | Integrin alpha-PS3; similar with ITA3_DROME                 |
| Px014250.1 | 2.0028  | 2.31E-65  | 3.24E-64  | Putative uncharacterized protein; similar with D6WG20_TRICA |
| Px003754.1 | 1.9228  | 1.67E-147 | 4.13E-146 | Membrane alanyl amino peptidase; similar with AMPM_MANSE    |
| Px003753.1 | 1.7587  | 0.00E+00  | 0.00E+00  | Membrane alanyl amino peptidase; similar with AMPM_HELVI    |
| Px015891.1 | 1.3621  | 4.81E-87  | 8.23E-86  | Peroxidase; similar with PERO_DROME                         |
| Px002532.1 | 1.2056  | 1.34E-124 | 2.93E-123 | Peroxidasin; similar with PXDN_DROME                        |
| Px005106.1 | 1.1107  | 1.62E-25  | 1.28E-24  | Amino peptidase N; similar with AMPN_CHICK                  |
| Px008080.1 | 1.0773  | 1.70E-05  | 5.37E-05  | Lysosome membrane protein 2; similar with SCRB2_HUMAN       |
| Px007394.2 | 1.0691  | 1.25E-39  | 1.29E-38  | Peroxidasin homolog; similar with PXDN_MOUSE                |
| Px011170.1 | -2.2057 | 2.29E-18  | 1.48E-17  | Hemicentin-1; similar with HMCN1_HUMAN                      |

### Involved in Tyrosine metabolism

|            |         |           |           |                                                                         |
|------------|---------|-----------|-----------|-------------------------------------------------------------------------|
| Px013761.3 | 9.0724  | 2.99E-08  | 1.19E-07  | Peroxidase; similar with PERO_DROME                                     |
| Px005646.1 | 4.6071  | 1.01E-58  | 1.31E-57  | Nose resistant to fluoxetine protein 6; similar with NRF6_CAEEL         |
| Px000359.2 | 4.0159  | 3.40E-22  | 2.47E-21  | Alpha-methyl dopa hypersensitive protein; similar with L2AM_DROME       |
| Px003528.3 | 3.9017  | 3.38E-20  | 2.32E-19  | Nose resistant to fluoxetine protein 6; similar with NRF6_CAEEL         |
| Px011202.1 | 3.5882  | 8.25E-143 | 2.01E-141 | Aromatic-L-amino-acid decarboxylase; similar with DDC_MANSE             |
| Px002585.2 | 3.5836  | 3.76E-53  | 4.58E-52  | Nose resistant to fluoxetine protein 6; similar with NRF6_CAEEL         |
| Px006617.2 | 3.3534  | 1.05E-31  | 9.40E-31  | Chorion peroxidase; similar with PERC_DROME                             |
| Px009569.1 | 3.3179  | 0.00E+00  | 0.00E+00  | Trypsin CFT-1; similar with TRYP_CHOFU                                  |
| Px012208.1 | 3.1992  | 4.12E-29  | 3.54E-28  | Probable flavin-containing monoamine oxidase A                          |
| Px007137.2 | 3.1853  | 1.13E-132 | 2.54E-131 | Peroxidase; similar with PERO_DROME                                     |
| Px005417.1 | 2.8142  | 7.10E-18  | 4.51E-17  | Nose resistant to fluoxetine protein 6; similar with NRF6_CAEEL         |
| Px015388.1 | 2.7618  | 1.35E-08  | 5.50E-08  | Nose resistant to fluoxetine protein 6; similar with NRF6_CAEEL         |
| Px002274.1 | 2.7121  | 0.00E+00  | 0.00E+00  | Phenoloxidase subunit 2; similar with PRP2_BOMMO                        |
| Px005418.1 | 2.6622  | 6.87E-07  | 2.48E-06  | Nose resistant to fluoxetine protein 6; similar with NRF6_CAEEL         |
| Px008866.1 | 2.4968  | 7.39E-17  | 4.55E-16  | Chorion peroxidase; similar with PERC_DROME                             |
| Px004684.1 | 1.7858  | 0.00E+00  | 0.00E+00  | Tyrosine 3-monooxygenase; similar with TY3H_DROME                       |
| Px013101.1 | 1.6622  | 3.21E-06  | 1.09E-05  | Nose resistant to fluoxetine protein 6; similar with NRF6_CAEEL         |
| Px011624.1 | 1.5666  | 4.24E-07  | 1.55E-06  | Nose resistant to fluoxetine protein 6; similar with NRF6_CAEEL         |
| Px010498.1 | 1.5315  | 2.77E-59  | 3.62E-58  | Fumarylacetoacetate hydrolase domain-containing protein 2               |
| Px015891.1 | 1.3621  | 4.81E-87  | 8.23E-86  | Peroxidase; similar with PERO_DROME                                     |
| Px014079.1 | 1.2713  | 4.69E-10  | 2.13E-09  | Nose resistant to fluoxetine protein 6; similar with NRF6_CAEEL         |
| Px002532.1 | 1.2056  | 1.34E-124 | 2.93E-123 | Peroxidasin; similar with PXDN_DROME                                    |
| Px001224.1 | 1.1741  | 3.07E-05  | 9.43E-05  | Maleylacetoacetate isomerase; similar with MAAI_MOUSE                   |
| Px011987.1 | 1.1403  | 4.97E-07  | 1.81E-06  | Amine oxidase [flavin-containing] B; similar with AOFB_MOUSE            |
| Px007394.2 | 1.0691  | 1.25E-39  | 1.29E-38  | Peroxidasin homolog; similar with PXDN_MOUSE                            |
| Px011234.1 | 1.0051  | 2.16E-04  | 5.97E-04  | Nose resistant to fluoxetine protein 6; similar with NRF6_CAEEL         |
| Px013191.1 | -1.2294 | 5.69E-11  | 2.72E-10  | Aromatic-L-amino-acid decarboxylase; similar with DDC_RAT               |
| Px007031.1 | -1.2120 | 0.00E+00  | 0.00E+00  | Basic juvenile hormone-suppressible protein 2; similar with BJSB2_TRINI |
| Px016931.1 | -1.0939 | 3.25E-26  | 2.60E-25  | Methyltransferase-like protein 6; similar with METL6_HUMAN              |

### Involved in mineral absorption

|            |        |          |          |                                                      |
|------------|--------|----------|----------|------------------------------------------------------|
| Px013802.1 | 8.5527 | 1.46E-08 | 5.93E-08 | Sodium/potassium-transporting ATPase subunit alpha-2 |
| Px010354.2 | 8.4829 | 6.15E-08 | 2.39E-07 | Envelope fusion protein; similar with ENV_NPVLD      |
| Px005784.1 | 3.8214 | 5.98E-16 | 3.58E-15 | Ferritin, chloroplastic; similar with FRI_MALXI      |
| Px014201.1 | 3.6008 | 7.33E-11 | 3.48E-10 | Sodium/potassium-transporting ATPase subunit alpha-2 |

|            |         |           |           |                                                                 |
|------------|---------|-----------|-----------|-----------------------------------------------------------------|
| Px014012.2 | 3.4448  | 3.32E-59  | 4.34E-58  | Proton-coupled folate transporter; similar with PCFT_XENLA      |
| Px004813.1 | 3.1234  | 8.30E-302 | 3.49E-300 | High affinity copper uptake protein 1; similar with COPT1_HUMAN |
| Px004604.5 | 2.2867  | 3.97E-06  | 1.34E-05  | Envelope fusion protein; similar with ENV_NPVLD                 |
| Px003205.1 | 2.1414  | 1.92E-12  | 9.88E-12  | Envelope fusion protein; similar with ENV_NPVLD                 |
| Px006683.1 | 2.1362  | 2.49E-07  | 9.29E-07  | Envelope fusion protein; similar with ENV_NPVLD                 |
| Px004843.1 | 1.8517  | 8.05E-08  | 3.11E-07  | ORF; similar with Q8I7Q1_DROME                                  |
| Px018019.1 | 1.8031  | 1.95E-05  | 6.12E-05  | Putative uncharacterized protein; similar with E2ARC4_9HYME     |
| Px007238.1 | 1.7626  | 1.98E-23  | 1.48E-22  | Solute carrier family 46 member 3; similar with S46A3_CHICK     |
| Px013208.1 | 1.7432  | 6.70E-193 | 2.04E-191 | Transferrin; similar with TRF_MANSE                             |
| Px015615.1 | 1.7053  | 2.16E-07  | 8.10E-07  | Proton-coupled folate transporter; similar with PCFT_DANRE      |
| Px004446.3 | 1.6970  | 2.01E-45  | 2.23E-44  | Copper-transporting ATPase 2; similar with ATP7B_MOUSE          |
| Px005491.1 | 1.5695  | 1.70E-21  | 1.22E-20  | High affinity copper uptake protein 1; similar with COPT1_HUMAN |
| Px012191.1 | 1.4028  | 2.38E-208 | 7.61E-207 | Sodium/potassium-transporting ATPase subunit alpha-1            |
| Px003168.1 | 1.3070  | 0.00E+00  | 0.00E+00  | Soma ferritin; similar with FRIS_LYMST                          |
| Px011103.1 | 1.2919  | 1.27E-08  | 5.22E-08  | Transferrin; similar with TRF_BLADI                             |
| Px003167.1 | 1.2675  | 3.51E-157 | 9.10E-156 | Ferritin subunit; similar with FRI_AEDAE                        |
| Px014014.2 | 1.2587  | 6.46E-21  | 4.55E-20  | Proton-coupled folate transporter; similar with PCFT_DANRE      |
| Px014013.2 | 1.2197  | 1.13E-07  | 4.34E-07  | Proton-coupled folate transporter; similar with PCFT_DANRE      |
| Px014019.1 | 1.1874  | 2.13E-08  | 8.57E-08  | Solute carrier family 46 member 3; similar with S46A3_CHICK     |
| Px015324.1 | 1.1450  | 2.99E-40  | 3.10E-39  | Proton-coupled folate transporter; similar with PCFT_XENLA      |
| Px011027.1 | 1.1279  | 4.95E-11  | 2.37E-10  | ORF; similar with Q8I7Q1_DROME                                  |
| Px005939.1 | 1.0952  | 5.25E-05  | 1.58E-04  | ORF; similar with Q8I7Q1_DROME                                  |
| Px004243.3 | 1.0071  | 7.75E-78  | 1.23E-76  | Ferritin subunit; similar with FRI_AEDAE                        |
| Px009302.2 | -1.5524 | 1.01E-125 | 2.21E-124 | Putative uncharacterized protein; similar with D7GYL0_TRICA     |
| Px014011.1 | -1.2447 | 1.09E-04  | 3.13E-04  | Proton-coupled folate transporter; similar with PCFT_XENLA      |

#### Involved in pertussis

|            |         |           |           |                                                                      |
|------------|---------|-----------|-----------|----------------------------------------------------------------------|
| Px015514.1 | 4.2671  | 1.44E-18  | 9.38E-18  | Serine/threonine-protein kinase pelle; similar with KPEL_DROME       |
| Px009987.1 | 2.8978  | 1.47E-38  | 1.48E-37  | Caspase-1; similar with CASP1_DROME                                  |
| Px010499.1 | 2.3073  | 3.86E-59  | 5.04E-58  | Serine/threonine-protein kinase pelle; similar with KPEL_DROME       |
| Px012279.1 | 2.1704  | 1.43E-32  | 1.30E-31  | Caltractin; similar with CATR_SCHDU                                  |
| Px007006.1 | 1.9791  | 1.83E-24  | 1.40E-23  | EF-hand domain-containing protein CG10641; similar with EFHD_DROME   |
| Px003725.1 | 1.9489  | 6.60E-74  | 1.01E-72  | Interleukin-1 receptor-associated kinase 4; similar with IRAK4_BOVIN |
| Px004376.3 | 1.8321  | 1.31E-14  | 7.38E-14  | Leucine-rich repeat-containing protein 34; similar with LRC34_MOUSE  |
| Px006496.1 | 1.7584  | 1.39E-18  | 9.08E-18  | Cytochrome b5 domain-containing protein 1; similar with CB5D1_HUMAN  |
| Px001400.1 | 1.7038  | 5.86E-54  | 7.19E-53  | Calmodulin; similar with CALM_PLECO                                  |
| Px004977.1 | 1.6799  | 1.55E-260 | 5.85E-259 | Transcription factor AP-1; similar with JRA_DROME                    |
| Px001556.1 | 1.6061  | 8.94E-117 | 1.85E-115 | Serine protease easter; similar with EAST_DROME                      |
| Px012395.1 | 1.2873  | 6.63E-51  | 7.90E-50  | Integrin beta-PS; similar with ITBX_DROME                            |
| Px012604.1 | 1.2789  | 4.84E-08  | 1.90E-07  | Integrin beta; similar with E9GI17_DAPPU                             |
| Px015363.1 | 1.2365  | 5.17E-05  | 1.55E-04  | Slit homolog 3 protein; similar with SLIT3_MOUSE                     |
| Px009367.1 | 1.1816  | 9.43E-06  | 3.07E-05  | Troponin C, isoform 1; similar with TNNC1_DROME                      |
| Px010253.1 | 1.1621  | 1.06E-107 | 2.11E-106 | Unknown functio                                                      |
| Px012423.1 | 1.1613  | 1.21E-06  | 4.25E-06  | TNF receptor-associated factor 6; similar with TRAF6_XENTR           |
| Px015782.1 | 1.1185  | 1.11E-14  | 6.29E-14  | Calmodulin; similar with CALM_PLAFA                                  |
| Px008096.1 | 1.0350  | 1.59E-05  | 5.03E-05  | TNF receptor-associated factor 6-B; similar with TRF6B_XENLA         |
| Px005668.1 | -2.2447 | 8.13E-05  | 2.38E-04  | NGFI-A-binding protein homolog; similar with NAB_DROME               |
| Px011260.1 | -1.6757 | 5.96E-122 | 1.28E-120 | Troponin C, isoform 2; similar with TNNC2_DROME                      |
| Px002799.3 | -1.4322 | 0.00E+00  | 0.00E+00  | Troponin C, isoform 1; similar with TNNC1_DROME                      |

#### Involved in ascorbate and aldarate metabolism

|            |        |          |          |                                                              |
|------------|--------|----------|----------|--------------------------------------------------------------|
| Px014883.1 | 2.5298 | 7.38E-32 | 6.64E-31 | Ecdysteroid UDP-glucosyltransferase; similar with UDPE_NPVSL |
| Px004854.1 | 2.1011 | 1.06E-15 | 6.27E-15 | Ecdysteroid UDP-glucosyltransferase; similar with UDPE_NPVSL |
| Px000872.2 | 1.8756 | 1.82E-09 | 7.93E-09 | Ecdysteroid UDP-glucosyltransferase; similar with UDPE_NPVSL |



|            |        |           |           |                                                              |
|------------|--------|-----------|-----------|--------------------------------------------------------------|
| Px000647.3 | 1.8232 | 6.21E-280 | 2.49E-278 | UDP-glucuronosyltransferase 2B7; similar with UD2B7_HUMAN    |
| Px000123.1 | 1.7598 | 0.00E+00  | 0.00E+00  | Putative aldehyde dehydrogenase family 7 member A1 homolog   |
| Px001113.1 | 1.6873 | 1.59E-11  | 7.83E-11  | Ecdysteroid UDP-glucosyltransferase; similar with UDPE_NPVSL |
| Px013203.1 | 1.4517 | 2.86E-06  | 9.77E-06  | UDP-glucuronosyltransferase 2B2; similar with UD2B2_RAT      |
| Px006848.1 | 1.2745 | 1.88E-14  | 1.05E-13  | UDP-glucose 6-dehydrogenase; similar with UGDH_DROME         |
| Px006292.1 | 1.2679 | 2.20E-13  | 1.18E-12  | Ecdysteroid UDP-glucosyltransferase; similar with UDPE_NPVSL |
| Px012877.1 | 1.2309 | 5.17E-17  | 3.21E-16  | Inositol oxygenase; similar with MIOX_DANRE                  |
| Px002733.2 | 1.2093 | 0.00E+00  | 0.00E+00  | Aldehyde dehydrogenase, dimeric NADP-preferring              |
| Px000039.1 | 1.1965 | 1.40E-231 | 4.93E-230 | UDP-glucuronosyltransferase 1-8; similar with UD18_RAT       |
| Px006815.1 | 1.1714 | 0.00E+00  | 0.00E+00  | Regucalcin; similar with RGN_DANRE                           |
| Px001164.1 | 1.1390 | 6.83E-117 | 1.42E-115 | UDP-glucuronosyltransferase; similar with UGT3_PLEPL         |
| Px012878.1 | 1.1388 | 3.00E-40  | 3.10E-39  | Inositol oxygenase; similar with MIOX_MOUSE                  |
| Px009675.1 | 1.1334 | 1.86E-96  | 3.40E-95  | UDP-glucuronosyltransferase 1-2; similar with UD12_MOUSE     |
| Px015080.1 | 1.1199 | 3.36E-06  | 1.14E-05  | Ecdysteroid UDP-glucosyltransferase; similar with UDPE_NPVMB |
| Px011285.1 | 1.0624 | 2.26E-250 | 8.22E-249 | UDP-glucuronosyltransferase 2B4; similar with UD2B4_HUMAN    |
| Px010576.1 | 1.0580 | 2.09E-20  | 1.44E-19  | Inositol oxygenase; similar with MIOX_DANRE                  |
| Px016791.1 | 1.0335 | 1.04E-22  | 7.66E-22  | Inositol oxygenase; similar with MIOX_DANRE                  |

---

**Table D.** A list of DEGs enriched in the *P. xylostella* pathways at 48 hpt<sub>I</sub> versus 48 hpt<sub>C</sub>.

| Gene ID                       | log <sub>2</sub> R | P-value   | FDR       | Annotation                                                                     |
|-------------------------------|--------------------|-----------|-----------|--------------------------------------------------------------------------------|
| <b>Involved in amoebiasis</b> |                    |           |           |                                                                                |
| Px007765.1                    | 10.6239            | 6.00E-05  | 1.81E-04  | Serine protease inhibitor 3/4; similar with SPI3_LONON                         |
| Px008374.1                    | 10.1228            | 1.11E-04  | 3.21E-04  | Phosphatidylinositol-4,5-bisphosphate 3-kinase catalytic subunit delta isoform |
| Px001465.1                    | 9.3895             | 9.76E-10  | 4.84E-09  | Putative uncharacterized protein; similar with D6WLC4_TRICA                    |
| Px002641.1                    | 4.0559             | 2.16E-109 | 6.30E-108 | Alpha-actinin-2; similar with ACTN2_BOVIN                                      |
| Px001917.1                    | 3.8840             | 8.31E-08  | 3.47E-07  | Receptor-mediated endocytosis protein 6 homolog                                |
| Px014766.1                    | 3.1608             | 9.70E-10  | 4.81E-09  | Metal transporter CNNM4; similar with CNNM4_MOUSE                              |
| Px009397.1                    | 2.9247             | 1.45E-06  | 5.37E-06  | Translation initiation factor IF-2; similar with IF2_CHLPPD                    |
| Px005596.1                    | 2.7721             | 1.45E-36  | 1.92E-35  | FERM and PDZ domain-containing protein 4                                       |
| Px011821.1                    | 2.6934             | 2.68E-04  | 7.29E-04  | Reticulon-4-interacting protein 1, mitochondrial                               |
| Px004755.2                    | 2.6104             | 2.23E-21  | 1.98E-20  | Putative uncharacterized protein; similar with D6W7K2_TRICA                    |
| Px014818.1                    | 2.5961             | 6.82E-07  | 2.61E-06  | Ecdysteroid 22-phosphate; similar with Q0PCR8_BOMMO                            |
| Px007895.2                    | 2.5462             | 3.78E-150 | 1.38E-148 | Peritrophic matrix insect intestinal mucin; similar with Q8ISS2_PLUXY          |
| Px008372.1                    | 2.4177             | 3.42E-08  | 1.48E-07  | Phosphatidylinositol-4,5-bisphosphate 3-kinase catalytic subunit beta isoform  |
| Px010041.2                    | 2.3397             | 1.97E-05  | 6.34E-05  | Circadian clock-controlled protein; similar with CCCP_DROME                    |
| Px009784.1                    | 2.2374             | 0.00E+00  | 0.00E+00  | Ribosome-binding protein 1; similar with RRBP1_HUMAN                           |
| Px009987.1                    | 2.1996             | 6.07E-12  | 3.49E-11  | Caspase-1; similar with CASP1_DROME                                            |
| Px010627.1                    | 2.1698             | 0.00E+00  | 0.00E+00  | Wing disc-specific protein; similar with Q8WPH2_BOMMO                          |
| Px008413.1                    | 2.1698             | 2.19E-06  | 7.93E-06  | AGAP011937-PA; similar with Q7PKC7_ANOGA                                       |
| Px007897.1                    | 2.1651             | 9.44E-23  | 8.75E-22  | Peritrophic matrix insect intestinal mucin; similar with Q8ISS2_PLUXY          |
| Px014841.1                    | 2.1518             | 5.47E-57  | 1.01E-55  | Unknown functio                                                                |
| Px005969.1                    | 2.1323             | 0.00E+00  | 0.00E+00  | Apolipoprotein D; similar with APOD_MACFA                                      |
| Px002309.1                    | 2.1123             | 1.77E-05  | 5.73E-05  | Putative uncharacterized protein; similar with E9IM57_SOLIN                    |
| Px007274.1                    | 2.0866             | 3.84E-16  | 2.78E-15  | Serpin B9; similar with SPB9_HUMAN                                             |
| Px001443.1                    | 2.0338             | 0.00E+00  | 0.00E+00  | L-ascorbate oxidase; similar with ASO_CUCPM                                    |
| Px004235.2                    | 1.8977             | 7.45E-11  | 4.01E-10  | Putative uncharacterized protein; similar with Q178N6_AEDAE                    |
| Px007273.1                    | 1.8846             | 3.63E-31  | 4.31E-30  | Plasminogen activator inhibitor 1; similar with PAI1_HUMAN                     |
| Px015898.1                    | 1.8788             | 0.00E+00  | 0.00E+00  | Putative farnesoic acid O-methyl transferase                                   |
| Px011646.1                    | 1.8633             | 2.33E-07  | 9.35E-07  | GA10261; similar with Q29B54_DROPS                                             |
| Px006878.1                    | 1.7943             | 2.54E-04  | 6.97E-04  | Protein kinase C, brain isozyme; similar with KPC1_DROME                       |
| Px004991.4                    | 1.7588             | 4.01E-30  | 4.65E-29  | Tyrosine-protein phosphatase non-receptor type 4                               |
| Px001831.1                    | 1.7548             | 1.93E-08  | 8.52E-08  | Headcase protein homolog; similar with HDC_HUMAN                               |
| Px011466.1                    | 1.7416             | 9.61E-19  | 7.76E-18  | Putative uncharacterized protein; similar with F0Y4G7_9STRA                    |
| Px000548.1                    | 1.7364             | 0.00E+00  | 0.00E+00  | Alpha-actinin, sarcomeric; similar with ACTN_DROME                             |
| Px003835.1                    | 1.7362             | 1.33E-13  | 8.38E-13  | Putative uncharacterized protein; similar with B0WNP5_CULQU                    |
| Px007399.1                    | 1.6693             | 1.30E-29  | 1.49E-28  | Putative uncharacterized protein; similar with D6WDQ4_TRICA                    |
| Px015729.1                    | 1.6242             | 3.15E-08  | 1.37E-07  | Vinculin; similar with VINC_DROME                                              |
| Px009510.1                    | 1.5900             | 2.13E-12  | 1.26E-11  | Cytosolic carboxypeptidase 1; similar with CBPC1_DANRE                         |
| Px013841.1                    | 1.5661             | 5.52E-39  | 7.58E-38  | Phytanoyl-CoA dioxygenase domain-containing protein 1                          |
| Px015087.3                    | 1.5281             | 0.00E+00  | 0.00E+00  | Glia-derived nexin; similar with GDN_HUMAN                                     |
| Px008604.1                    | 1.5243             | 7.49E-30  | 8.64E-29  | AGAP011476-PA; similar with Q7Q343_ANOGA                                       |
| Px012264.1                    | 1.5180             | 4.16E-221 | 2.02E-219 | Ejaculatory bulb-specific protein 3; similar with PEB3_DROME                   |
| Px011301.2                    | 1.5122             | 5.33E-93  | 1.38E-91  | Putative uncharacterized protein; similar with D6WH87_TRICA                    |
| Px009152.1                    | 1.4996             | 5.17E-21  | 4.54E-20  | Innexin inx7; similar with INX7_DROME                                          |
| Px000651.1                    | 1.4970             | 3.22E-13  | 1.99E-12  | Extracellular domains-containing protein CG31004                               |
| Px006536.1                    | 1.4850             | 0.00E+00  | 0.00E+00  | HMG176; similar with Q0MTA5_HELAM                                              |
| Px013635.1                    | 1.4584             | 1.68E-22  | 1.54E-21  | Extracellular domains-containing protein CG31004                               |
| Px000072.1                    | 1.4166             | 5.91E-14  | 3.80E-13  | Protein CLEC16A; similar with CL16A_HUMAN                                      |
| Px001494.2                    | 1.4053             | 0.00E+00  | 0.00E+00  | Alaserpin; similar with SERA_MANSE                                             |
| Px009586.1                    | 1.4046             | 1.13E-06  | 4.22E-06  | Phosphatidylinositol 3-kinase regulatory subunit gamma                         |
| Px001082.1                    | 1.3854             | 0.00E+00  | 0.00E+00  | Unknown functio                                                                |

|            |         |           |           |                                                                |
|------------|---------|-----------|-----------|----------------------------------------------------------------|
| Px013721.1 | 1.3817  | 2.56E-15  | 1.79E-14  | Endonuclease-reverse transcriptase; similar with D7F170_BOMMO  |
| Px002670.1 | 1.3679  | 0.00E+00  | 0.00E+00  | Apolipoporphins; similar with APLP_MANSE                       |
| Px007271.1 | 1.3439  | 6.03E-169 | 2.36E-167 | Serpin B9; similar with SPB9_HUMAN                             |
| Px012786.1 | 1.3299  | 0.00E+00  | 0.00E+00  | GH11122; similar with B4JCY6_DROGR                             |
| Px013975.1 | 1.3267  | 2.86E-07  | 1.13E-06  | Cuticlin-1; similar with E2BP69_9HYME                          |
| Px009301.1 | 1.3241  | 2.23E-45  | 3.46E-44  | Beta-1,3-glucan-binding protein; similar with BGBP_BOMMO       |
| Px017059.1 | 1.3144  | 3.09E-78  | 7.16E-77  | Serpin B6; similar with SPB6_HUMAN                             |
| Px011737.1 | 1.3022  | 0.00E+00  | 0.00E+00  | Neurofilament heavy polypeptide; similar with NFH_MOUSE        |
| Px002835.1 | 1.2932  | 1.92E-04  | 5.37E-04  | Fasciclin-1; similar with FAS1_SCHAM                           |
| Px002792.1 | 1.2920  | 7.53E-26  | 7.80E-25  | Unknown functio                                                |
| Px004419.1 | 1.2908  | 2.43E-07  | 9.72E-07  | Putative uncharacterized protein GLEAN_08369                   |
| Px015492.1 | 1.2649  | 5.91E-22  | 5.35E-21  | Protein halfway; similar with HFW1_DROPS                       |
| Px005140.1 | 1.2596  | 1.46E-06  | 5.39E-06  | Focal adhesion kinase 1; similar with FAK1_RAT                 |
| Px002608.1 | 1.2583  | 1.73E-12  | 1.03E-11  | Protein kinase DC2; similar with KDC2_DROME                    |
| Px008882.1 | 1.2281  | 6.01E-123 | 1.88E-121 | Unknown functio                                                |
| Px008031.1 | 1.1629  | 2.57E-04  | 7.03E-04  | cAMP-dependent protein kinase catalytic subunit alpha          |
| Px005739.1 | 1.1553  | 1.10E-15  | 7.78E-15  | Putative uncharacterized protein; similar with BOW6E4_CULQU    |
| Px015730.1 | 1.1397  | 0.00E+00  | 0.00E+00  | Apolipoporphins; similar with APLP_MANSE                       |
| Px001430.1 | 1.1298  | 0.00E+00  | 0.00E+00  | Chitin deacetylase 1; similar with B2ZGH5_9NEOP                |
| Px001080.1 | 1.1262  | 0.00E+00  | 0.00E+00  | Unknown functio                                                |
| Px005322.1 | 1.1251  | 2.50E-46  | 3.97E-45  | Cuticle protein 19; similar with CU19_LOCFMI                   |
| Px002640.1 | 1.1212  | 8.64E-275 | 4.94E-273 | Alpha-actinin, sarcomeric; similar with ACTN_DROME             |
| Px003409.1 | 1.1173  | 2.96E-04  | 8.01E-04  | Protein toll; similar with TOLL_DROME                          |
| Px008393.1 | 1.1138  | 3.51E-06  | 1.24E-05  | Nck-associated protein 5; similar with NCKP5_HUMAN             |
| Px015010.1 | 1.0950  | 1.19E-43  | 1.79E-42  | Heat shock protein beta-1; similar with HSPB1_CHICK            |
| Px002572.2 | 1.0850  | 2.97E-25  | 3.01E-24  | Large proline-rich protein bag6-A; similar with BAG6A_XENLA    |
| Px015090.1 | 1.0837  | 2.60E-268 | 1.46E-266 | Serpin B6; similar with SPB6_HUMAN                             |
| Px015092.1 | 1.0810  | 2.56E-59  | 4.92E-58  | Unknown functio                                                |
| Px014947.1 | 1.0681  | 1.22E-23  | 1.17E-22  | Putative uncharacterized protein; similar with E2AAT5_9HYME    |
| Px016246.1 | -9.0336 | 3.73E-04  | 9.91E-04  | Unknown functio                                                |
| Px012920.1 | -5.7371 | 1.31E-14  | 8.79E-14  | Unknown functio                                                |
| Px003251.1 | -5.6346 | 2.17E-287 | 1.29E-285 | Putative cuticle protein; similar with C0H6E8_BOMMO            |
| Px010970.1 | -5.1269 | 1.33E-210 | 6.09E-209 | Cuticle protein; similar with CU01_ANOGA                       |
| Px001530.1 | -5.1032 | 8.45E-92  | 2.16E-90  | Neurofilament heavy polypeptide; similar with NFH_MOUSE        |
| Px001327.2 | -4.9271 | 1.00E-22  | 9.26E-22  | Unknown functio                                                |
| Px014502.2 | -4.9177 | 1.09E-29  | 1.26E-28  | Putative uncharacterized protein; similar with BOW8F8_CULQU    |
| Px012644.1 | -4.8891 | 1.72E-84  | 4.13E-83  | Filamentous hemagglutinin; similar with FHAB_BORPE             |
| Px008648.1 | -4.8302 | 1.88E-14  | 1.25E-13  | Larval/pupal rigid cuticle protein 66; similar with CU66_HYACE |
| Px005321.1 | -4.6028 | 2.84E-34  | 3.61E-33  | Cuticle protein 19; similar with CU19_LOCFMI                   |
| Px014251.1 | -4.3113 | 1.63E-18  | 1.30E-17  | Putative uncharacterized protein; similar with D6WG20_TRICA    |
| Px005318.1 | -4.2809 | 2.97E-43  | 4.42E-42  | Cuticle protein 19; similar with CU19_LOCFMI                   |
| Px016161.1 | -4.1521 | 1.00E-98  | 2.73E-97  | Neurofilament heavy polypeptide; similar with NFH_RAT          |
| Px010665.1 | -3.9457 | 7.76E-14  | 4.96E-13  | Putative uncharacterized protein; similar with E3WXH7_ANODA    |
| Px017104.1 | -3.9233 | 1.10E-16  | 8.19E-16  | Neurofilament heavy polypeptide; similar with NFH_MOUSE        |
| Px014245.1 | -3.5851 | 1.97E-19  | 1.63E-18  | Unknown functio                                                |
| Px001674.1 | -3.5040 | 1.12E-30  | 1.32E-29  | Cuticular protein CPG7; similar with B2DBG1_9NEOP              |
| Px012919.2 | -3.4152 | 4.85E-05  | 1.49E-04  | Cuticle protein 19; similar with CU19_LOCFMI                   |
| Px005323.1 | -3.2863 | 1.82E-23  | 1.73E-22  | Cuticle protein 19; similar with CU19_LOCFMI                   |
| Px008500.1 | -3.0987 | 1.00E-124 | 3.20E-123 | Pupal cuticle protein; similar with CUPP_BOMMO                 |
| Px003249.1 | -2.7665 | 0.00E+00  | 0.00E+00  | Larval cuticle protein LCP-22; similar with CU22_BOMMO         |
| Px008654.1 | -2.7571 | 5.40E-28  | 5.90E-27  | Pupal cuticle protein Edg-84A; similar with CUP8_DROME         |
| Px007290.1 | -2.6760 | 7.93E-134 | 2.68E-132 | Cuticle protein; similar with CU01_ANOGA                       |
| Px009321.1 | -2.6343 | 1.76E-19  | 1.45E-18  | Cuticle protein 3; similar with CU03_LONON                     |
| Px002841.1 | -2.5840 | 3.11E-15  | 2.17E-14  | Putative uncharacterized protein GLEAN_07427                   |

|            |         |           |           |                                                             |
|------------|---------|-----------|-----------|-------------------------------------------------------------|
| Px003254.3 | -2.4993 | 0.00E+00  | 0.00E+00  | Larval cuticle protein LCP-17; similar with CU17_BOMMO      |
| Px014252.1 | -2.2750 | 5.84E-15  | 3.99E-14  | Putative uncharacterized protein; similar with D6WG20_TRICA |
| Px003252.2 | -2.2721 | 0.00E+00  | 0.00E+00  | Larval cuticle protein LCP-30; similar with CU30_BOMMO      |
| Px004340.1 | -2.1994 | 2.01E-05  | 6.48E-05  | Uncharacterized protein; similar with F1SF10_PIG            |
| Px003681.1 | -2.1521 | 5.92E-15  | 4.05E-14  | Cuticle protein 19; similar with CU19_LOCFMI                |
| Px013556.1 | -1.9665 | 0.00E+00  | 0.00E+00  | Flexible cuticle protein 12; similar with CU12_HYACE        |
| Px001064.1 | -1.9506 | 2.87E-247 | 1.54E-245 | Pupal cuticle protein Edg-84A; similar with CUP8_DROME      |
| Px008653.1 | -1.9082 | 3.21E-20  | 2.74E-19  | Cuticle protein; similar with CU01_ANOGA                    |
| Px005288.1 | -1.8733 | 2.28E-12  | 1.35E-11  | Putative cuticle protein; similar with Q9U504_MANSE         |
| Px003259.1 | -1.8425 | 5.66E-111 | 1.68E-109 | Endocuticle structural glycoprotein SgAbd-2                 |
| Px005317.2 | -1.8082 | 1.04E-14  | 6.99E-14  | Cuticle protein 7; similar with CU07_LOCFMI                 |
| Px010337.1 | -1.7509 | 4.56E-46  | 7.17E-45  | Cuticular protein CPR77; similar with B2DBI2_9NEOP          |
| Px002615.1 | -1.7185 | 7.88E-24  | 7.62E-23  | C-type lectin, galactose-binding (AGAP010196-PA)            |
| Px005891.1 | -1.7086 | 5.24E-10  | 2.66E-09  | Putative cuticle protein; similar with Q9U509_MANSE         |
| Px001065.1 | -1.6858 | 5.33E-19  | 4.33E-18  | Cuticle protein; similar with CU01_ANOGA                    |
| Px008954.1 | -1.6672 | 1.06E-274 | 6.05E-273 | Protein MICAL-2; similar with MICA2_HUMAN                   |
| Px009941.1 | -1.6603 | 3.34E-04  | 8.97E-04  | Putative uncharacterized protein; similar with E2A5A2_9HYME |
| Px017593.1 | -1.6187 | 5.41E-41  | 7.74E-40  | Putative uncharacterized protein; similar with D6X1E0_TRICA |
| Px000919.1 | -1.5620 | 9.67E-48  | 1.58E-46  | Enhancer of split m4 protein; similar with ESM4_DROME       |
| Px014262.1 | -1.5611 | 1.89E-59  | 3.65E-58  | Putative cuticle protein; similar with C0H6H1_BOMMO         |
| Px014536.1 | -1.5191 | 8.05E-25  | 8.03E-24  | Unknown functio                                             |
| Px001789.1 | -1.4859 | 7.13E-28  | 7.75E-27  | Protein toll; similar with TOLL_DROME                       |
| Px011630.1 | -1.4823 | 5.20E-09  | 2.43E-08  | Cuticle protein 7; similar with CU07_LOCFMI                 |
| Px005320.1 | -1.4616 | 1.11E-148 | 4.03E-147 | Cuticle protein 7; similar with CU07_LOCFMI                 |
| Px003255.1 | -1.4547 | 0.00E+00  | 0.00E+00  | Larval cuticle protein LCP-17; similar with CU17_BOMMO      |
| Px003245.1 | -1.3445 | 1.84E-227 | 9.18E-226 | Larval cuticle protein LCP-22; similar with CU22_BOMMO      |
| Px013555.1 | -1.2894 | 4.85E-254 | 2.64E-252 | Flexible cuticle protein 12; similar with CU12_HYACE        |
| Px003729.1 | -1.2580 | 4.23E-75  | 9.56E-74  | Venom allergen 3; similar with VA3_SOLIN                    |
| Px014247.3 | -1.2306 | 0.00E+00  | 0.00E+00  | Cuticular protein CPR77; similar with B2DBI2_9NEOP          |
| Px008408.1 | -1.2190 | 8.68E-14  | 5.53E-13  | Ras-related protein RabJ; similar with E2C0I8_9HYME         |
| Px008652.2 | -1.2135 | 3.96E-44  | 6.01E-43  | Cuticle protein; similar with CU01_ANOGA                    |
| Px010900.1 | -1.1915 | 0.00E+00  | 0.00E+00  | Unknown functio                                             |
| Px008680.1 | -1.1712 | 2.29E-04  | 6.33E-04  | Putative dsRNase; similar with B7VCC3_SPOLI                 |
| Px016485.1 | -1.1684 | 5.49E-15  | 3.77E-14  | Pupal cuticle protein; similar with CUPP_BOMMO              |
| Px001226.2 | -1.1578 | 4.15E-18  | 3.25E-17  | Collagen alpha-2(I) chain; similar with CO1A2_RAT           |
| Px015352.3 | -1.1051 | 3.91E-06  | 1.38E-05  | Putative uncharacterized protein; similar with E3X258_ANODA |
| Px015226.1 | -1.0508 | 9.46E-128 | 3.07E-126 | GI23113; similar with B4KCI7_DROMO                          |
| Px014261.1 | -1.0402 | 6.99E-38  | 9.43E-37  | Putative cuticle protein; similar with C0H6H2_BOMMO         |
| Px009438.1 | -1.0079 | 2.26E-54  | 4.06E-53  | Arginase, non-hepatic 2; similar with ARGN2_XENLA           |

### Involved in vibrio cholerae infection

|            |        |           |           |                                                             |
|------------|--------|-----------|-----------|-------------------------------------------------------------|
| Px003126.1 | 9.7828 | 1.11E-04  | 3.21E-04  | Adenylate cyclase type 3; similar with ADCY3_MOUSE          |
| Px001465.1 | 9.3895 | 9.76E-10  | 4.84E-09  | Putative uncharacterized protein; similar with D6WLC4_TRICA |
| Px008411.1 | 8.8650 | 6.00E-05  | 1.81E-04  | Adenylate cyclase type 3; similar with ADCY3_MOUSE          |
| Px001917.1 | 3.8840 | 8.31E-08  | 3.47E-07  | Receptor-mediated endocytosis protein 6 homolog             |
| Px014766.1 | 3.1608 | 9.70E-10  | 4.81E-09  | Metal transporter CNNM4; similar with CNNM4_MOUSE           |
| Px009397.1 | 2.9247 | 1.45E-06  | 5.37E-06  | Translation initiation factor IF-2; similar with IF2_CHLPD  |
| Px011821.1 | 2.6934 | 2.68E-04  | 7.29E-04  | Reticulon-4-interacting protein 1, mitochondrial            |
| Px004755.2 | 2.6104 | 2.23E-21  | 1.98E-20  | Putative uncharacterized protein; similar with D6W7K2_TRICA |
| Px014818.1 | 2.5961 | 6.82E-07  | 2.61E-06  | Ecdysteroid 22-phosphate; similar with Q0PCR8_BOMMO         |
| Px007895.2 | 2.5462 | 3.78E-150 | 1.38E-148 | Peritrophic matrix insect intestinal mucin                  |
| Px010041.2 | 2.3397 | 1.97E-05  | 6.34E-05  | Circadian clock-controlled protein; similar with CCCP_DROME |
| Px009784.1 | 2.2374 | 0.00E+00  | 0.00E+00  | Ribosome-binding protein 1; similar with RRBPI_HUMAN        |
| Px008413.1 | 2.1698 | 2.19E-06  | 7.93E-06  | AGAP011937-PA; similar with Q7PKC7_ANOGA                    |

|            |         |           |           |                                                                   |
|------------|---------|-----------|-----------|-------------------------------------------------------------------|
| Px007897.1 | 2.1651  | 9.44E-23  | 8.75E-22  | Peritrophic matrix insect intestinal mucin                        |
| Px014841.1 | 2.1518  | 5.47E-57  | 1.01E-55  | Unknown functio                                                   |
| Px005969.1 | 2.1323  | 0.00E+00  | 0.00E+00  | Apolipoprotein D; similar with APOD_MACFA                         |
| Px002309.1 | 2.1123  | 1.77E-05  | 5.73E-05  | Putative uncharacterized protein; similar with E9IM57_SOLIN       |
| Px001443.1 | 2.0338  | 0.00E+00  | 0.00E+00  | L-ascorbate oxidase; similar with ASO_CUCPM                       |
| Px004235.2 | 1.8977  | 7.45E-11  | 4.01E-10  | Putative uncharacterized protein; similar with Q178N6_AEDAE       |
| Px015898.1 | 1.8788  | 0.00E+00  | 0.00E+00  | Putative farnesoic acid O-methyl transferase                      |
| Px016879.1 | 1.8644  | 1.62E-08  | 7.21E-08  | Disks large homolog 5; similar with DLG5_HUMAN                    |
| Px011646.1 | 1.8633  | 2.33E-07  | 9.35E-07  | GA10261; similar with Q29B54_DROPS                                |
| Px006878.1 | 1.7943  | 2.54E-04  | 6.97E-04  | Protein kinase C, brain isozyme; similar with KPC1_DROME          |
| Px007889.1 | 1.7872  | 5.41E-05  | 1.65E-04  | V-type proton ATPase 116 kDa subunit a isoform 1                  |
| Px004991.4 | 1.7588  | 4.01E-30  | 4.65E-29  | Tyrosine-protein phosphatase non-receptor type 4                  |
| Px001831.1 | 1.7548  | 1.93E-08  | 8.52E-08  | Headcase protein homolog; similar with HDC_HUMAN                  |
| Px011466.1 | 1.7416  | 9.61E-19  | 7.76E-18  | Putative uncharacterized protein; similar with F0Y4G7_9STRA       |
| Px003835.1 | 1.7362  | 1.33E-13  | 8.38E-13  | Putative uncharacterized protein; similar with B0WNP5_CULQU       |
| Px003751.1 | 1.6696  | 1.67E-28  | 1.85E-27  | V-type proton ATPase 116 kDa subunit a isoform 1                  |
| Px007399.1 | 1.6693  | 1.30E-29  | 1.49E-28  | Putative uncharacterized protein; similar with D6WDQ4_TRICA       |
| Px009510.1 | 1.5900  | 2.13E-12  | 1.26E-11  | Cytosolic carboxypeptidase 1; similar with CBPC1_DANRE            |
| Px013582.1 | 1.5749  | 3.43E-09  | 1.62E-08  | TBC1 domain family member 24; similar with TBC24_XENTR            |
| Px010270.1 | 1.5696  | 0.00E+00  | 0.00E+00  | Putative protein disulfide-isomerase C1F5.02                      |
| Px013841.1 | 1.5661  | 5.52E-39  | 7.58E-38  | Phytanoyl-CoA dioxygenase domain-containing protein 1             |
| Px008604.1 | 1.5243  | 7.49E-30  | 8.64E-29  | AGAP011476-PA; similar with Q7Q343_ANOGA                          |
| Px012264.1 | 1.5180  | 4.16E-221 | 2.02E-219 | Ejaculatory bulb-specific protein 3; similar with PEB3_DROME      |
| Px011301.2 | 1.5122  | 5.33E-93  | 1.38E-91  | Putative uncharacterized protein; similar with D6WH87_TRICA       |
| Px009152.1 | 1.4996  | 5.17E-21  | 4.54E-20  | Innexin inx7; similar with INX7_DROME                             |
| Px003232.1 | 1.4984  | 1.17E-10  | 6.25E-10  | 1-phosphatidylinositol-4,5-bisphosphate phosphodiesterase gamma-1 |
| Px000651.1 | 1.4970  | 3.22E-13  | 1.99E-12  | Extracellular domains-containing protein CG31004                  |
| Px006536.1 | 1.4850  | 0.00E+00  | 0.00E+00  | HMG176; similar with Q0MTA5_HELAM                                 |
| Px013635.1 | 1.4584  | 1.68E-22  | 1.54E-21  | Extracellular domains-containing protein CG31004                  |
| Px000072.1 | 1.4166  | 5.91E-14  | 3.80E-13  | Protein CLEC16A; similar with CL16A_HUMAN                         |
| Px001082.1 | 1.3854  | 0.00E+00  | 0.00E+00  | Unknown functio                                                   |
| Px002670.1 | 1.3679  | 0.00E+00  | 0.00E+00  | Apolipoporphins; similar with APLP_MANSE                          |
| Px012786.1 | 1.3299  | 0.00E+00  | 0.00E+00  | GH11122; similar with B4JCY6_DROGR                                |
| Px013975.1 | 1.3267  | 2.86E-07  | 1.13E-06  | Cuticlin-1; similar with E2BP69_9HYME                             |
| Px009301.1 | 1.3241  | 2.23E-45  | 3.46E-44  | Beta-1,3-glucan-binding protein; similar with BGBP_BOMMO          |
| Px002835.1 | 1.2932  | 1.92E-04  | 5.37E-04  | Fasciclin-1; similar with FAS1_SCHAM                              |
| Px004419.1 | 1.2908  | 2.43E-07  | 9.72E-07  | Putative uncharacterized protein GLEAN_08369                      |
| Px015492.1 | 1.2649  | 5.91E-22  | 5.35E-21  | Protein halfway; similar with HFW1_DROPS                          |
| Px002608.1 | 1.2583  | 1.73E-12  | 1.03E-11  | Protein kinase DC2; similar with KDC2_DROME                       |
| Px008031.1 | 1.1629  | 2.57E-04  | 7.03E-04  | cAMP-dependent protein kinase catalytic subunit alpha             |
| Px015730.1 | 1.1397  | 0.00E+00  | 0.00E+00  | Apolipoporphins; similar with APLP_MANSE                          |
| Px001430.1 | 1.1298  | 0.00E+00  | 0.00E+00  | Chitin deacetylase 1; similar with B2ZGH5_9NEOP                   |
| Px001080.1 | 1.1262  | 0.00E+00  | 0.00E+00  | Unknown functio                                                   |
| Px005322.1 | 1.1251  | 2.50E-46  | 3.97E-45  | Cuticle protein 19; similar with CU19_LOCFMI                      |
| Px015092.1 | 1.0810  | 2.56E-59  | 4.92E-58  | Unknown functio                                                   |
| Px008625.1 | 1.0738  | 1.64E-58  | 3.13E-57  | V-type proton ATPase 116 kDa subunit a isoform 1                  |
| Px014947.1 | 1.0681  | 1.22E-23  | 1.17E-22  | Putative uncharacterized protein; similar with E2AAT5_9HYME       |
| Px000220.2 | 1.0629  | 2.79E-05  | 8.80E-05  | Bumetanide-sensitive sodium-(potassium)-chloride cotransporter    |
| Px016770.1 | 1.0207  | 3.65E-12  | 2.13E-11  | V-type proton ATPase subunit C; similar with VATC_MANSE           |
| Px016246.1 | -9.0336 | 3.73E-04  | 9.91E-04  | Unknown functio                                                   |
| Px012920.1 | -5.7371 | 1.31E-14  | 8.79E-14  | Unknown functio                                                   |
| Px010970.1 | -5.1269 | 1.33E-210 | 6.09E-209 | Cuticle protein; similar with CU01_ANOGA                          |
| Px001530.1 | -5.1032 | 8.45E-92  | 2.16E-90  | Neurofilament heavy polypeptide; similar with NFH_MOUSE           |
| Px001327.2 | -4.9271 | 1.00E-22  | 9.26E-22  | Unknown functio                                                   |

|            |         |           |           |                                                                |
|------------|---------|-----------|-----------|----------------------------------------------------------------|
| Px014502.2 | -4.9177 | 1.09E-29  | 1.26E-28  | Putative uncharacterized protein; similar with B0W8F8_CULQU    |
| Px012644.1 | -4.8891 | 1.72E-84  | 4.13E-83  | Filamentous hemagglutinin; similar with FHAB_BORPE             |
| Px008648.1 | -4.8302 | 1.88E-14  | 1.25E-13  | Larval/pupal rigid cuticle protein 66; similar with CU66_HYACE |
| Px005321.1 | -4.6028 | 2.84E-34  | 3.61E-33  | Cuticle protein 19; similar with CU19_LOCFMI                   |
| Px014251.1 | -4.3113 | 1.63E-18  | 1.30E-17  | Putative uncharacterized protein; similar with D6WG20_TRICA    |
| Px005318.1 | -4.2809 | 2.97E-43  | 4.42E-42  | Cuticle protein 19; similar with CU19_LOCFMI                   |
| Px016161.1 | -4.1521 | 1.00E-98  | 2.73E-97  | Neurofilament heavy polypeptide; similar with NFH_RAT          |
| Px010665.1 | -3.9457 | 7.76E-14  | 4.96E-13  | Putative uncharacterized protein; similar with E3WXH7_ANODA    |
| Px017104.1 | -3.9233 | 1.10E-16  | 8.19E-16  | Neurofilament heavy polypeptide; similar with NFH_MOUSE        |
| Px014245.1 | -3.5851 | 1.97E-19  | 1.63E-18  | Unknown functio                                                |
| Px012919.2 | -3.4152 | 4.85E-05  | 1.49E-04  | Cuticle protein 19; similar with CU19_LOCFMI                   |
| Px005323.1 | -3.2863 | 1.82E-23  | 1.73E-22  | Cuticle protein 19; similar with CU19_LOCFMI                   |
| Px008500.1 | -3.0987 | 1.00E-124 | 3.20E-123 | Pupal cuticle protein; similar with CUPP_BOMMO                 |
| Px003249.1 | -2.7665 | 0.00E+00  | 0.00E+00  | Larval cuticle protein LCP-22; similar with CU22_BOMMO         |
| Px008654.1 | -2.7571 | 5.40E-28  | 5.90E-27  | Pupal cuticle protein Edg-84A; similar with CUP8_DROME         |
| Px007290.1 | -2.6760 | 7.93E-134 | 2.68E-132 | Cuticle protein; similar with CU01_ANOGA                       |
| Px009321.1 | -2.6343 | 1.76E-19  | 1.45E-18  | Cuticle protein 3; similar with CU03_LONON                     |
| Px002841.1 | -2.5840 | 3.11E-15  | 2.17E-14  | Putative uncharacterized protein GLEAN_07427                   |
| Px003254.3 | -2.4993 | 0.00E+00  | 0.00E+00  | Larval cuticle protein LCP-17; similar with CU17_BOMMO         |
| Px014252.1 | -2.2750 | 5.84E-15  | 3.99E-14  | Putative uncharacterized protein; similar with D6WG20_TRICA    |
| Px003252.2 | -2.2721 | 0.00E+00  | 0.00E+00  | Larval cuticle protein LCP-30; similar with CU30_BOMMO         |
| Px004340.1 | -2.1994 | 2.01E-05  | 6.48E-05  | Uncharacterized protein; similar with F1SF10_PIG               |
| Px003681.1 | -2.1521 | 5.92E-15  | 4.05E-14  | Cuticle protein 19; similar with CU19_LOCFMI                   |
| Px013556.1 | -1.9665 | 0.00E+00  | 0.00E+00  | Flexible cuticle protein 12; similar with CU12_HYACE           |
| Px001064.1 | -1.9506 | 2.87E-247 | 1.54E-245 | Pupal cuticle protein Edg-84A; similar with CUP8_DROME         |
| Px008653.1 | -1.9082 | 3.21E-20  | 2.74E-19  | Cuticle protein; similar with CU01_ANOGA                       |
| Px005288.1 | -1.8733 | 2.28E-12  | 1.35E-11  | Putative cuticle protein; similar with Q9U504_MANSE            |
| Px003259.1 | -1.8425 | 5.66E-111 | 1.68E-109 | Endocuticle structural glycoprotein SgAbd-2                    |
| Px005317.2 | -1.8082 | 1.04E-14  | 6.99E-14  | Cuticle protein 7; similar with CU07_LOCFMI                    |
| Px010337.1 | -1.7509 | 4.56E-46  | 7.17E-45  | Cuticular protein CPR77; similar with B2DBI2_9NEOP             |
| Px002615.1 | -1.7185 | 7.88E-24  | 7.62E-23  | C-type lectin, galactose-binding (AGAP010196-PA)               |
| Px005891.1 | -1.7086 | 5.24E-10  | 2.66E-09  | Putative cuticle protein; similar with Q9U509_MANSE            |
| Px001065.1 | -1.6858 | 5.33E-19  | 4.33E-18  | Cuticle protein; similar with CU01_ANOGA                       |
| Px008954.1 | -1.6672 | 1.06E-274 | 6.05E-273 | Protein MICAL-2; similar with MICA2_HUMAN                      |
| Px009941.1 | -1.6603 | 3.34E-04  | 8.97E-04  | Putative uncharacterized protein; similar with E2A5A2_9HYME    |
| Px017593.1 | -1.6187 | 5.41E-41  | 7.74E-40  | Putative uncharacterized protein; similar with D6X1E0_TRICA    |
| Px000919.1 | -1.5620 | 9.67E-48  | 1.58E-46  | Enhancer of split m4 protein; similar with ESM4_DROME          |
| Px014262.1 | -1.5611 | 1.89E-59  | 3.65E-58  | Putative cuticle protein; similar with C0H6H1_BOMMO            |
| Px014536.1 | -1.5191 | 8.05E-25  | 8.03E-24  | Unknown functio                                                |
| Px011630.1 | -1.4823 | 5.20E-09  | 2.43E-08  | Cuticle protein 7; similar with CU07_LOCFMI                    |
| Px005320.1 | -1.4616 | 1.11E-148 | 4.03E-147 | Cuticle protein 7; similar with CU07_LOCFMI                    |
| Px003255.1 | -1.4547 | 0.00E+00  | 0.00E+00  | Larval cuticle protein LCP-17; similar with CU17_BOMMO         |
| Px003245.1 | -1.3445 | 1.84E-227 | 9.18E-226 | Larval cuticle protein LCP-22; similar with CU22_BOMMO         |
| Px013555.1 | -1.2894 | 4.85E-254 | 2.64E-252 | Flexible cuticle protein 12; similar with CU12_HYACE           |
| Px003729.1 | -1.2580 | 4.23E-75  | 9.56E-74  | Venom allergen 3; similar with VA3_SOLIN                       |
| Px014247.3 | -1.2306 | 0.00E+00  | 0.00E+00  | Cuticular protein CPR77; similar with B2DBI2_9NEOP             |
| Px008652.2 | -1.2135 | 3.96E-44  | 6.01E-43  | Cuticle protein; similar with CU01_ANOGA                       |
| Px010900.1 | -1.1915 | 0.00E+00  | 0.00E+00  | Unknown functio                                                |
| Px008680.1 | -1.1712 | 2.29E-04  | 6.33E-04  | Putative dsRNase; similar with B7VCC3_SPOLI                    |
| Px016485.1 | -1.1684 | 5.49E-15  | 3.77E-14  | Pupal cuticle protein; similar with CUPP_BOMMO                 |
| Px015352.3 | -1.1051 | 3.91E-06  | 1.38E-05  | Putative uncharacterized protein; similar with E3X258_ANODA    |
| Px015226.1 | -1.0508 | 9.46E-128 | 3.07E-126 | GI23113; similar with B4KCI7_DROMO                             |
| Px014261.1 | -1.0402 | 6.99E-38  | 9.43E-37  | Putative cuticle protein; similar with C0H6H2_BOMMO            |

### Involved in pancreatic secretion

|            |        |           |           |                                                               |
|------------|--------|-----------|-----------|---------------------------------------------------------------|
| Px003126.1 | 9.7828 | 1.11E-04  | 3.21E-04  | Adenylate cyclase type 3; similar with ADCY3_MOUSE            |
| Px008411.1 | 8.8650 | 6.00E-05  | 1.81E-04  | Adenylate cyclase type 3; similar with ADCY3_MOUSE            |
| Px009476.1 | 4.3986 | 3.12E-06  | 1.11E-05  | Group 3 secretory phospholipase A2; similar with PA2G3_BOVIN  |
| Px008089.1 | 3.9186 | 0.00E+00  | 0.00E+00  | Pancreatic lipase-related protein 2; similar with LIPR2_CAVPO |
| Px004847.1 | 3.8702 | 4.52E-11  | 2.46E-10  | Putative carbonic anhydrase 5; similar with CAH5_CAEEL        |
| Px005242.1 | 3.0767 | 6.37E-17  | 4.80E-16  | Trypsin CFT-1; similar with TRYP_CHOFU                        |
| Px007621.1 | 3.0027 | 5.16E-07  | 2.00E-06  | Trypsin CFT-1; similar with TRYP_CHOFU                        |
| Px007357.2 | 2.9638 | 0.00E+00  | 0.00E+00  | Serine proteinase stubble; similar with STUB_DROME            |
| Px017492.1 | 2.9247 | 3.48E-05  | 1.08E-04  | Trypsin CFT-1; similar with TRYP_CHOFU                        |
| Px005241.1 | 2.8923 | 3.63E-27  | 3.87E-26  | Trypsin CFT-1; similar with TRYP_CHOFU                        |
| Px007617.1 | 2.8498 | 1.67E-246 | 8.96E-245 | Trypsin CFT-1; similar with TRYP_CHOFU                        |
| Px000992.1 | 2.7356 | 0.00E+00  | 0.00E+00  | Carboxypeptidase A1; similar with CBPA1_BOVIN                 |
| Px014882.1 | 2.6696 | 8.90E-26  | 9.20E-25  | Trypsin, alkaline C; similar with TRYC_MANSE                  |
| Px006441.1 | 2.6454 | 0.00E+00  | 0.00E+00  | Lipase member H; similar with LIPH_RAT                        |
| Px008830.1 | 2.5145 | 3.44E-20  | 2.93E-19  | Trypsin, alkaline C; similar with TRYC_MANSE                  |
| Px001804.1 | 2.4772 | 1.61E-09  | 7.81E-09  | Trypsin, alkaline B; similar with TRYB_MANSE                  |
| Px011683.2 | 2.4698 | 9.12E-191 | 3.91E-189 | Venom carboxylesterase-6; similar with EST6_APIME             |
| Px005243.1 | 2.4179 | 0.00E+00  | 0.00E+00  | Trypsin, alkaline A; similar with TRYA_MANSE                  |
| Px009569.1 | 2.3697 | 7.48E-240 | 3.88E-238 | Trypsin CFT-1; similar with TRYP_CHOFU                        |
| Px000104.1 | 2.3695 | 6.34E-13  | 3.87E-12  | Pancreatic lipase-related protein 2; similar with LIPR2_CAVPO |
| Px007616.1 | 2.3535 | 1.02E-74  | 2.30E-73  | Trypsin CFT-1; similar with TRYP_CHOFU                        |
| Px007618.1 | 2.2331 | 1.62E-143 | 5.75E-142 | Trypsin CFT-1; similar with TRYP_CHOFU                        |
| Px000402.2 | 2.2104 | 2.09E-62  | 4.14E-61  | Serine protease persephone; similar with PSH_DROME            |
| Px014592.1 | 2.1944 | 1.03E-24  | 1.02E-23  | Trypsin CFT-1; similar with TRYP_CHOFU                        |
| Px002512.1 | 2.1941 | 1.00E-35  | 1.30E-34  | Brachyurin; similar with COGS_UCAPU                           |
| Px006571.1 | 2.1935 | 0.00E+00  | 0.00E+00  | Trypsin, alkaline B; similar with TRYB_MANSE                  |
| Px016057.1 | 2.1333 | 4.30E-39  | 5.93E-38  | Trypsin, alkaline B; similar with TRYB_MANSE                  |
| Px011788.2 | 2.1319 | 2.40E-67  | 5.04E-66  | Pancreatic lipase-related protein 2; similar with LIPR2_BOVIN |
| Px002309.1 | 2.1123 | 1.77E-05  | 5.73E-05  | Putative uncharacterized protein; similar with E9IM57_SOLIN   |
| Px005612.4 | 2.0853 | 4.92E-69  | 1.05E-67  | Calcium-activated potassium channel slowpoke                  |
| Px001239.1 | 2.0005 | 4.17E-33  | 5.19E-32  | Serine protease P162; similar with D2A5Y8_TRICA               |
| Px010386.1 | 1.9598 | 3.91E-233 | 1.99E-231 | Trypsin CFT-1; similar with TRYP_CHOFU                        |
| Px015275.1 | 1.9447 | 0.00E+00  | 0.00E+00  | Trypsin CFT-1; similar with TRYP_CHOFU                        |
| Px005244.1 | 1.9247 | 6.69E-08  | 2.82E-07  | Trypsin CFT-1; similar with TRYP_CHOFU                        |
| Px002492.1 | 1.9068 | 7.27E-05  | 2.17E-04  | Carbonic anhydrase 3; similar with CAH3_BOVIN                 |
| Px004235.2 | 1.8977 | 7.45E-11  | 4.01E-10  | Putative uncharacterized protein; similar with Q178N6_AEDAE   |
| Px015277.1 | 1.8808 | 1.20E-25  | 1.23E-24  | Trypsin CFT-1; similar with TRYP_CHOFU                        |
| Px013377.1 | 1.8477 | 2.46E-41  | 3.55E-40  | Trypsin; similar with TRYP_PHACE                              |
| Px006878.1 | 1.7943 | 2.54E-04  | 6.97E-04  | Protein kinase C, brain isozyme; similar with KPC1_DROME      |
| Px007619.2 | 1.7921 | 0.00E+00  | 0.00E+00  | Trypsin, alkaline A; similar with TRYA_MANSE                  |
| Px012048.1 | 1.7891 | 2.09E-29  | 2.38E-28  | Chymotrypsin BI; similar with CTRB1_LITVA                     |
| Px006345.1 | 1.7781 | 1.52E-87  | 3.77E-86  | Pancreatic lipase-related protein 2; similar with LIPR2_MYOCO |
| Px001831.1 | 1.7548 | 1.93E-08  | 8.52E-08  | Headcase protein homolog; similar with HDC_HUMAN              |
| Px004131.5 | 1.7548 | 8.64E-41  | 1.23E-39  | Calcium-independent phospholipase A2-gamma                    |
| Px011886.1 | 1.7454 | 1.59E-62  | 3.15E-61  | Trypsin CFT-1; similar with TRYP_CHOFU                        |
| Px000991.6 | 1.7324 | 1.37E-46  | 2.20E-45  | Carboxypeptidase O; similar with CBPO_BOVIN                   |
| Px007674.2 | 1.7282 | 5.92E-240 | 3.08E-238 | Collagenase; similar with COGS_HYPLI                          |
| Px005238.1 | 1.7135 | 3.84E-20  | 3.26E-19  | Trypsin, alkaline B; similar with TRYB_MANSE                  |
| Px012568.1 | 1.7128 | 3.61E-103 | 1.02E-101 | Trypsin CFT-1; similar with TRYP_CHOFU                        |
| Px004753.1 | 1.7057 | 1.64E-52  | 2.88E-51  | Pancreatic lipase-related protein 2; similar with LIPR2_MYOCO |
| Px003649.1 | 1.6988 | 0.00E+00  | 0.00E+00  | Esterase FE4; similar with ESTF_MYZPE                         |
| Px013162.1 | 1.6859 | 3.98E-103 | 1.12E-101 | Serine protease snake; similar with SNAK_DROME                |
| Px000995.2 | 1.6774 | 3.14E-184 | 1.31E-182 | Carboxypeptidase A4; similar with CBPA4_HUMAN                 |

|            |         |           |           |                                                                |
|------------|---------|-----------|-----------|----------------------------------------------------------------|
| Px016055.1 | 1.6104  | 9.12E-07  | 3.45E-06  | Trypsin, alkaline C; similar with TRYC_MANSE                   |
| Px009638.1 | 1.5712  | 0.00E+00  | 0.00E+00  | Trypsin, alkaline B; similar with TRYB_MANSE                   |
| Px011049.1 | 1.5512  | 8.68E-06  | 2.92E-05  | Acetylcholinesterase; similar with ACES_FELCA                  |
| Px002866.1 | 1.5483  | 8.45E-05  | 2.49E-04  | Trypsin, alkaline A; similar with TRYA_MANSE                   |
| Px001833.1 | 1.5360  | 1.24E-301 | 7.61E-300 | Serine protease easter; similar with EAST_DROME                |
| Px002441.1 | 1.5324  | 9.72E-35  | 1.25E-33  | Trypsin, alkaline B; similar with TRYB_MANSE                   |
| Px000107.1 | 1.5230  | 1.38E-223 | 6.76E-222 | Trypsin, alkaline C; similar with TRYC_MANSE                   |
| Px006572.1 | 1.5222  | 0.00E+00  | 0.00E+00  | Trypsin; similar with TRYP_PHACE                               |
| Px005239.1 | 1.5039  | 3.47E-65  | 7.08E-64  | Trypsin, alkaline A; similar with TRYA_MANSE                   |
| Px002861.1 | 1.5031  | 0.00E+00  | 0.00E+00  | Trypsin, alkaline C; similar with TRYC_MANSE                   |
| Px011889.1 | 1.4989  | 1.23E-05  | 4.08E-05  | Achelase-1; similar with ACH1_LONAC                            |
| Px000993.1 | 1.4934  | 0.00E+00  | 0.00E+00  | Carboxypeptidase A2; similar with CBPA2_RAT                    |
| Px009789.1 | 1.4710  | 1.21E-05  | 3.99E-05  | Adenylate cyclase type 2; similar with ADCY2_DROME             |
| Px009940.2 | 1.4584  | 2.00E-08  | 8.84E-08  | Acetylcholinesterase; similar with ACES_CULPI                  |
| Px003712.1 | 1.4525  | 1.46E-09  | 7.13E-09  | Acetylcholinesterase; similar with ACES_CULPI                  |
| Px011499.2 | 1.4297  | 2.51E-12  | 1.48E-11  | Serine protease persephone; similar with PSH_DROME             |
| Px016056.1 | 1.4149  | 0.00E+00  | 0.00E+00  | Trypsin, alkaline A; similar with TRYA_MANSE                   |
| Px004752.1 | 1.3734  | 0.00E+00  | 0.00E+00  | Pancreatic lipase-related protein 2; similar with LIPR2_BOVIN  |
| Px000515.1 | 1.3647  | 1.85E-27  | 1.99E-26  | Esterase FE4; similar with ESTF_MYZPE                          |
| Px007900.1 | 1.3608  | 0.00E+00  | 0.00E+00  | Chymotrypsin BI; similar with CTRB1_LITVA                      |
| Px002296.1 | 1.3429  | 6.45E-75  | 1.45E-73  | Pancreatic triacylglycerol lipase; similar with LIPP_HUMAN     |
| Px002864.1 | 1.3149  | 1.41E-13  | 8.90E-13  | Trypsin, alkaline B; similar with TRYB_MANSE                   |
| Px011443.1 | 1.2632  | 1.85E-11  | 1.03E-10  | Esterase FE4; similar with ESTF_MYZPE                          |
| Px005193.2 | 1.2375  | 6.57E-27  | 6.96E-26  | Pancreatic lipase-related protein 2; similar with LIPR2_MYOCO  |
| Px009566.1 | 1.2291  | 1.92E-62  | 3.79E-61  | Trypsin, alkaline C; similar with TRYC_MANSE                   |
| Px012939.1 | 1.2048  | 1.82E-08  | 8.07E-08  | Protein turtle; similar with TUTL_DROME                        |
| Px015791.1 | 1.1914  | 1.59E-08  | 7.06E-08  | Sodium/potassium-transporting ATPase subunit beta-1            |
| Px005342.1 | 1.1769  | 1.93E-52  | 3.38E-51  | Collagenase; similar with COGS_HYPLI                           |
| Px004750.1 | 1.1637  | 0.00E+00  | 0.00E+00  | Pancreatic lipase-related protein 2; similar with LIPR2_RAT    |
| Px009639.1 | 1.1592  | 0.00E+00  | 0.00E+00  | Trypsin CFT-1; similar with TRYP_CHOFU                         |
| Px017996.1 | 1.1300  | 3.04E-23  | 2.87E-22  | Acetylcholinesterase; similar with ACES_HUMAN                  |
| Px003670.2 | 1.1149  | 0.00E+00  | 0.00E+00  | Serine protease easter; similar with EAST_DROME                |
| Px006570.1 | 1.1073  | 0.00E+00  | 0.00E+00  | Trypsin, alkaline B; similar with TRYB_MANSE                   |
| Px007601.1 | 1.1017  | 1.31E-16  | 9.72E-16  | Chymotrypsin-1; similar with CTR1_ANOGA                        |
| Px003970.1 | 1.0952  | 2.72E-182 | 1.13E-180 | Plasma membrane calcium-transporting ATPase 3                  |
| Px016307.3 | 1.0876  | 1.22E-104 | 3.47E-103 | Sodium/potassium-transporting ATPase subunit alpha             |
| Px000220.2 | 1.0629  | 2.79E-05  | 8.80E-05  | Bumetanide-sensitive sodium-(potassium)-chloride cotransporter |
| Px002295.1 | 1.0591  | 2.25E-92  | 5.79E-91  | Pancreatic lipase-related protein 2; similar with LIPR2_BOVIN  |
| Px010855.1 | 1.0588  | 6.22E-09  | 2.89E-08  | Trypsin, alkaline A; similar with TRYA_MANSE                   |
| Px017515.1 | 1.0202  | 4.47E-23  | 4.19E-22  | Trypsin, alkaline C; similar with TRYC_MANSE                   |
| Px000994.1 | 1.0157  | 0.00E+00  | 0.00E+00  | Zinc carboxypeptidase A 1; similar with CBPA1_DROPS            |
| Px000996.2 | 1.0153  | 2.16E-05  | 6.93E-05  | Carboxypeptidase A2; similar with CBPA2_MOUSE                  |
| Px005936.2 | 1.0100  | 2.58E-14  | 1.70E-13  | Trypsin, alkaline C; similar with TRYC_MANSE                   |
| Px011887.1 | 1.0083  | 4.45E-16  | 3.21E-15  | Trypsin, alkaline C; similar with TRYC_MANSE                   |
| Px000395.1 | 1.0057  | 3.37E-180 | 1.39E-178 | Alpha-amylase 4N; similar with AM4N_DROAN                      |
| Px000191.1 | -8.8435 | 3.73E-04  | 9.91E-04  | Trypsin-4; similar with TRY4_ANOGA                             |
| Px003251.1 | -5.6346 | 2.17E-287 | 1.29E-285 | Putative cuticle protein; similar with C0H6E8_BOMMO            |
| Px008989.1 | -4.8302 | 9.70E-08  | 4.03E-07  | Trypsin CFT-1; similar with TRYP_CHOFU                         |
| Px010907.1 | -3.3130 | 1.22E-46  | 1.96E-45  | Putative uncharacterized protein; similar with D6WJ01_TRICA    |
| Px001990.2 | -2.4252 | 2.16E-214 | 9.99E-213 | Carboxypeptidase B; similar with CBPB_ASTFL                    |
| Px014636.1 | -2.1712 | 8.11E-09  | 3.72E-08  | Trypsin-1; similar with TRY1_ANOGA                             |
| Px016923.1 | -1.8978 | 1.61E-208 | 7.33E-207 | Carbonic anhydrase 2; similar with CAH2_HUMAN                  |
| Px000102.1 | -1.8916 | 1.29E-32  | 1.57E-31  | Pancreatic lipase-related protein 3; similar with LIPR3_HUMAN  |
| Px005373.1 | -1.8302 | 1.62E-09  | 7.87E-09  | Carboxypeptidase B; similar with CBPB_ASTFL                    |



|            |         |          |          |                                                        |
|------------|---------|----------|----------|--------------------------------------------------------|
| Px002588.1 | -1.7813 | 6.19E-16 | 4.43E-15 | Trypsin, alkaline C; similar with TRYC_MANSE           |
| Px015279.1 | -1.5306 | 1.85E-04 | 5.19E-04 | Trypsin, alkaline A; similar with TRYA_MANSE           |
| Px012677.1 | -1.2183 | 2.47E-04 | 6.79E-04 | Lipase member H-A; similar with LIPHA_XENLA            |
| Px004846.1 | -1.1784 | 2.93E-85 | 7.09E-84 | Putative carbonic anhydrase 5; similar with CAH5_CAEEL |
| Px002440.1 | -1.1249 | 5.69E-06 | 1.96E-05 | Trypsin, alkaline B; similar with TRYB_MANSE           |

#### Involved in leishmaniasis

|            |         |           |           |                                                                |
|------------|---------|-----------|-----------|----------------------------------------------------------------|
| Px004914.1 | 10.5170 | 2.04E-04  | 5.68E-04  | Short neuropeptide F; similar with SNPF_ANOGA                  |
| Px005645.3 | 3.3986  | 8.90E-10  | 4.43E-09  | Integrin alpha-PS3; similar with ITA3_DROME                    |
| Px002004.1 | 2.4537  | 5.97E-61  | 1.17E-59  | Mitogen-activated protein kinase kinase kinase 7               |
| Px006837.1 | 2.4520  | 3.28E-29  | 3.72E-28  | Serine/threonine-protein kinase pelle; similar with KPEL_DROME |
| Px014553.1 | 2.1507  | 7.24E-12  | 4.15E-11  | Mitogen-activated protein kinase ERK-A                         |
| Px003725.1 | 2.1160  | 5.10E-66  | 1.05E-64  | Interleukin-1 receptor-associated kinase 4                     |
| Px010499.1 | 1.9100  | 1.29E-36  | 1.70E-35  | Serine/threonine-protein kinase pelle                          |
| Px000138.1 | 1.8328  | 1.68E-04  | 4.76E-04  | Mitogen-activated protein kinase ERK-A                         |
| Px006878.1 | 1.7943  | 2.54E-04  | 6.97E-04  | Protein kinase C, brain isozyme; similar with KPC1_DROME       |
| Px012604.1 | 1.6352  | 2.94E-07  | 1.16E-06  | Integrin beta; similar with E9GI17_DAPPU                       |
| Px004977.1 | 1.5523  | 5.30E-143 | 1.87E-141 | Transcription factor AP-1; similar with JRA_DROME              |
| Px015514.1 | 1.4407  | 7.97E-06  | 2.69E-05  | Serine/threonine-protein kinase pelle; similar with KPEL_DROME |
| Px015291.1 | 1.1344  | 1.11E-12  | 6.70E-12  | Mitogen-activated protein kinase 14B                           |
| Px011555.1 | 1.1315  | 1.20E-63  | 2.40E-62  | Integrin beta-PS; similar with ITBX_DROME                      |
| Px002012.1 | 1.1305  | 5.59E-10  | 2.83E-09  | Integrin beta-nu; similar with ITBN_DROME                      |
| Px003409.1 | 1.1173  | 2.96E-04  | 8.01E-04  | Protein toll; similar with TOLL_DROME                          |
| Px013907.1 | 1.0469  | 8.58E-06  | 2.89E-05  | Tyrosine-protein kinase hopscotch; similar with JAK_DROME      |
| Px001789.1 | -1.4859 | 7.13E-28  | 7.75E-27  | Protein toll; similar with TOLL_DROME                          |

#### Involved in Influenza A

|            |         |           |           |                                                                                |
|------------|---------|-----------|-----------|--------------------------------------------------------------------------------|
| Px004914.1 | 10.5170 | 2.04E-04  | 5.68E-04  | Short neuropeptide F; similar with SNPF_ANOGA                                  |
| Px008374.1 | 10.1228 | 1.11E-04  | 3.21E-04  | Phosphatidylinositol-4,5-bisphosphate 3-kinase catalytic subunit delta isoform |
| Px001483.1 | 5.1123  | 2.71E-10  | 1.40E-09  | Leucine-rich repeat and WD repeat-containing protein KIAA1239                  |
| Px005242.1 | 3.0767  | 6.37E-17  | 4.80E-16  | Trypsin CFT-1; similar with TRYP_CHOFU                                         |
| Px007621.1 | 3.0027  | 5.16E-07  | 2.00E-06  | Trypsin CFT-1; similar with TRYP_CHOFU                                         |
| Px007357.2 | 2.9638  | 0.00E+00  | 0.00E+00  | Serine proteinase stubble; similar with STUB_DROME                             |
| Px004099.2 | 2.9544  | 2.23E-23  | 2.11E-22  | Chaoptin; similar with CHAO_DROME                                              |
| Px017492.1 | 2.9247  | 3.48E-05  | 1.08E-04  | Trypsin CFT-1; similar with TRYP_CHOFU                                         |
| Px005241.1 | 2.8923  | 3.63E-27  | 3.87E-26  | Trypsin CFT-1; similar with TRYP_CHOFU                                         |
| Px007617.1 | 2.8498  | 1.67E-246 | 8.96E-245 | Trypsin CFT-1; similar with TRYP_CHOFU                                         |
| Px014882.1 | 2.6696  | 8.90E-26  | 9.20E-25  | Trypsin, alkaline C; similar with TRYC_MANSE                                   |
| Px008830.1 | 2.5145  | 3.44E-20  | 2.93E-19  | Trypsin, alkaline C; similar with TRYC_MANSE                                   |
| Px001804.1 | 2.4772  | 1.61E-09  | 7.81E-09  | Trypsin, alkaline B; similar with TRYB_MANSE                                   |
| Px006837.1 | 2.4520  | 3.28E-29  | 3.72E-28  | Serine/threonine-protein kinase pelle; similar with KPEL_DROME                 |
| Px005243.1 | 2.4179  | 0.00E+00  | 0.00E+00  | Trypsin, alkaline A; similar with TRYA_MANSE                                   |
| Px008372.1 | 2.4177  | 3.42E-08  | 1.48E-07  | Phosphatidylinositol-4,5-bisphosphate 3-kinase catalytic subunit beta isoform  |
| Px009569.1 | 2.3697  | 7.48E-240 | 3.88E-238 | Trypsin CFT-1; similar with TRYP_CHOFU                                         |
| Px007616.1 | 2.3535  | 1.02E-74  | 2.30E-73  | Trypsin CFT-1; similar with TRYP_CHOFU                                         |
| Px007618.1 | 2.2331  | 1.62E-143 | 5.75E-142 | Trypsin CFT-1; similar with TRYP_CHOFU                                         |
| Px010505.1 | 2.2215  | 1.05E-44  | 1.61E-43  | Programmed cell death protein 4; similar with PDCD4_CHICK                      |
| Px013101.1 | 2.2142  | 7.92E-05  | 2.35E-04  | Nose resistant to fluoxetine protein 6; similar with NRF6_CAEEL                |
| Px000402.2 | 2.2104  | 2.09E-62  | 4.14E-61  | Serine protease persephone; similar with PSH_DROME                             |
| Px011248.1 | 2.1953  | 2.38E-05  | 7.59E-05  | Radial spoke head protein 4 homolog A                                          |
| Px014592.1 | 2.1944  | 1.03E-24  | 1.02E-23  | Trypsin CFT-1; similar with TRYP_CHOFU                                         |
| Px006571.1 | 2.1935  | 0.00E+00  | 0.00E+00  | Trypsin, alkaline B; similar with TRYB_MANSE                                   |
| Px014553.1 | 2.1507  | 7.24E-12  | 4.15E-11  | Mitogen-activated protein kinase ERK-A                                         |
| Px002457.1 | 2.1483  | 7.92E-64  | 1.59E-62  | Protein dpy-19 homolog 1; similar with D19L1_HUMAN                             |

|            |        |           |           |                                                                |
|------------|--------|-----------|-----------|----------------------------------------------------------------|
| Px016057.1 | 2.1333 | 4.30E-39  | 5.93E-38  | Trypsin, alkaline B; similar with TRYB_MANSE                   |
| Px003725.1 | 2.1160 | 5.10E-66  | 1.05E-64  | Interleukin-1 receptor-associated kinase 4                     |
| Px009870.1 | 2.1030 | 0.00E+00  | 0.00E+00  | Inter-alpha-trypsin inhibitor heavy chain H5-like protein      |
| Px013633.1 | 2.0616 | 3.46E-39  | 4.80E-38  | tRNA 2-thiocytidine biosynthesis protein TtcA                  |
| Px003186.1 | 2.0295 | 2.84E-71  | 6.21E-70  | RAC serine/threonine-protein kinase; similar with AKT1_DROME   |
| Px006234.1 | 2.0012 | 1.49E-24  | 1.47E-23  | Chaoptin; similar with CHAO_DROME                              |
| Px001239.1 | 2.0005 | 4.17E-33  | 5.19E-32  | Serine protease P162; similar with D2A5Y8_TRICA                |
| Px010386.1 | 1.9598 | 3.91E-233 | 1.99E-231 | Trypsin CFT-1; similar with TRYP_CHOFU                         |
| Px015275.1 | 1.9447 | 0.00E+00  | 0.00E+00  | Trypsin CFT-1; similar with TRYP_CHOFU                         |
| Px005244.1 | 1.9247 | 6.69E-08  | 2.82E-07  | Trypsin CFT-1; similar with TRYP_CHOFU                         |
| Px010499.1 | 1.9100 | 1.29E-36  | 1.70E-35  | Serine/threonine-protein kinase pelle; similar with KPEL_DROME |
| Px015277.1 | 1.8808 | 1.20E-25  | 1.23E-24  | Trypsin CFT-1; similar with TRYP_CHOFU                         |
| Px013377.1 | 1.8477 | 2.46E-41  | 3.55E-40  | Trypsin; similar with TRYP_PHACE                               |
| Px000138.1 | 1.8328 | 1.68E-04  | 4.76E-04  | Mitogen-activated protein kinase ERK-A                         |
| Px006878.1 | 1.7943 | 2.54E-04  | 6.97E-04  | Protein kinase C, brain isozyme; similar with KPC1_DROME       |
| Px007619.2 | 1.7921 | 0.00E+00  | 0.00E+00  | Trypsin, alkaline A; similar with TRYA_MANSE                   |
| Px011886.1 | 1.7454 | 1.59E-62  | 3.15E-61  | Trypsin CFT-1; similar with TRYP_CHOFU                         |
| Px005238.1 | 1.7135 | 3.84E-20  | 3.26E-19  | Trypsin, alkaline B; similar with TRYB_MANSE                   |
| Px012568.1 | 1.7128 | 3.61E-103 | 1.02E-101 | Trypsin CFT-1; similar with TRYP_CHOFU                         |
| Px013162.1 | 1.6859 | 3.98E-103 | 1.12E-101 | Serine protease snake; similar with SNAK_DROME                 |
| Px016055.1 | 1.6104 | 9.12E-07  | 3.45E-06  | Trypsin, alkaline C; similar with TRYC_MANSE                   |
| Px009638.1 | 1.5712 | 0.00E+00  | 0.00E+00  | Trypsin, alkaline B; similar with TRYB_MANSE                   |
| Px004977.1 | 1.5523 | 5.30E-143 | 1.87E-141 | Transcription factor AP-1; similar with JRA_DROME              |
| Px002866.1 | 1.5483 | 8.45E-05  | 2.49E-04  | Trypsin, alkaline A; similar with TRYA_MANSE                   |
| Px001833.1 | 1.5360 | 1.24E-301 | 7.61E-300 | Serine protease easter; similar with EAST_DROME                |
| Px009928.1 | 1.5324 | 1.81E-04  | 5.08E-04  | Farnesyl pyrophosphate synthase 2; similar with FPPS2_ARATH    |
| Px002441.1 | 1.5324 | 9.72E-35  | 1.25E-33  | Trypsin, alkaline B; similar with TRYB_MANSE                   |
| Px008604.1 | 1.5243 | 7.49E-30  | 8.64E-29  | AGAP011476-PA; similar with Q7Q343_ANOGA                       |
| Px000107.1 | 1.5230 | 1.38E-223 | 6.76E-222 | Trypsin, alkaline C; similar with TRYC_MANSE                   |
| Px006572.1 | 1.5222 | 0.00E+00  | 0.00E+00  | Trypsin; similar with TRYP_PHACE                               |
| Px005239.1 | 1.5039 | 3.47E-65  | 7.08E-64  | Trypsin, alkaline A; similar with TRYA_MANSE                   |
| Px002861.1 | 1.5031 | 0.00E+00  | 0.00E+00  | Trypsin, alkaline C; similar with TRYC_MANSE                   |
| Px011889.1 | 1.4989 | 1.23E-05  | 4.08E-05  | Achelase-1; similar with ACH1_LONAC                            |
| Px015514.1 | 1.4407 | 7.97E-06  | 2.69E-05  | Serine/threonine-protein kinase pelle; similar with KPEL_DROME |
| Px011499.2 | 1.4297 | 2.51E-12  | 1.48E-11  | Serine protease persephone; similar with PSH_DROME             |
| Px016056.1 | 1.4149 | 0.00E+00  | 0.00E+00  | Trypsin, alkaline A; similar with TRYA_MANSE                   |
| Px009586.1 | 1.4046 | 1.13E-06  | 4.22E-06  | Phosphatidylinositol 3-kinase regulatory subunit gamma         |
| Px017224.1 | 1.3397 | 6.85E-10  | 3.44E-09  | Chaoptin; similar with CHAO_DROME                              |
| Px013698.3 | 1.3397 | 1.45E-04  | 4.14E-04  | Dedicator of cytokinesis protein 6; similar with DOCK6_HUMAN   |
| Px007552.1 | 1.3210 | 8.40E-38  | 1.13E-36  | Paramyosin, putative; similar with E0VGP7_PEDHC                |
| Px002864.1 | 1.3149 | 1.41E-13  | 8.90E-13  | Trypsin, alkaline B; similar with TRYB_MANSE                   |
| Px010747.1 | 1.2582 | 3.63E-14  | 2.36E-13  | Protein phosphatase 1 regulatory subunit 7                     |
| Px009566.1 | 1.2291 | 1.92E-62  | 3.79E-61  | Trypsin, alkaline C; similar with TRYC_MANSE                   |
| Px005490.1 | 1.2205 | 5.89E-39  | 8.08E-38  | Inhibitor of nuclear factor kappa-B kinase subunit beta        |
| Px013205.1 | 1.2182 | 3.01E-14  | 1.97E-13  | Putative uncharacterized protein; similar with D6WHY1_TRICA    |
| Px005342.1 | 1.1769 | 1.93E-52  | 3.38E-51  | Collagenase; similar with COGS_HYPLI                           |
| Px009639.1 | 1.1592 | 0.00E+00  | 0.00E+00  | Trypsin CFT-1; similar with TRYP_CHOFU                         |
| Px015291.1 | 1.1344 | 1.11E-12  | 6.70E-12  | Mitogen-activated protein kinase 14B                           |
| Px003409.1 | 1.1173 | 2.96E-04  | 8.01E-04  | Protein toll; similar with TOLL_DROME                          |
| Px003670.2 | 1.1149 | 0.00E+00  | 0.00E+00  | Serine protease easter; similar with EAST_DROME                |
| Px006570.1 | 1.1073 | 0.00E+00  | 0.00E+00  | Trypsin, alkaline B; similar with TRYB_MANSE                   |
| Px007601.1 | 1.1017 | 1.31E-16  | 9.72E-16  | Chymotrypsin-1; similar with CTR1_ANOGA                        |
| Px007918.1 | 1.1016 | 4.70E-06  | 1.64E-05  | Three prime repair exonuclease 2; similar with TREX2_MOUSE     |
| Px011869.1 | 1.0924 | 5.18E-16  | 3.73E-15  | Arf-GAP domain and FG repeats-containing protein 1             |

|            |         |           |           |                                                             |
|------------|---------|-----------|-----------|-------------------------------------------------------------|
| Px014947.1 | 1.0681  | 1.22E-23  | 1.17E-22  | Putative uncharacterized protein; similar with E2AAT5_9HYME |
| Px010855.1 | 1.0588  | 6.22E-09  | 2.89E-08  | Trypsin, alkaline A; similar with TRYA_MANSE                |
| Px007700.1 | 1.0471  | 1.22E-07  | 5.02E-07  | Nuclear RNA export factor 1; similar with NXF1_DROME        |
| Px013907.1 | 1.0469  | 8.58E-06  | 2.89E-05  | Tyrosine-protein kinase hopscotch; similar with JAK_DROME   |
| Px005422.1 | 1.0342  | 2.89E-73  | 6.46E-72  | Exportin-1; similar with XPO1_MOUSE                         |
| Px006146.1 | 1.0275  | 2.16E-16  | 1.58E-15  | Eukaryotic translation initiation factor 2-alpha kinase 3   |
| Px011958.1 | 1.0257  | 7.39E-12  | 4.23E-11  | Transmembrane protein 184B; similar with T184B_HUMAN        |
| Px007415.2 | 1.0237  | 1.29E-06  | 4.81E-06  | Furin-like protease 1, isoforms 1/1-X/2                     |
| Px017515.1 | 1.0202  | 4.47E-23  | 4.19E-22  | Trypsin, alkaline C; similar with TRYC_MANSE                |
| Px005936.2 | 1.0100  | 2.58E-14  | 1.70E-13  | Trypsin, alkaline C; similar with TRYC_MANSE                |
| Px011887.1 | 1.0083  | 4.45E-16  | 3.21E-15  | Trypsin, alkaline C; similar with TRYC_MANSE                |
| Px016832.3 | 1.0068  | 6.61E-06  | 2.26E-05  | Stress-activated protein kinase JNK; similar with JNK_DROME |
| Px000191.1 | -8.8435 | 3.73E-04  | 9.91E-04  | Trypsin-4; similar with TRY4_ANOGA                          |
| Px008989.1 | -4.8302 | 9.70E-08  | 4.03E-07  | Trypsin CFT-1; similar with TRYP_CHOFU                      |
| Px014636.1 | -2.1712 | 8.11E-09  | 3.72E-08  | Trypsin-1; similar with TRY1_ANOGA                          |
| Px002588.1 | -1.7813 | 6.19E-16  | 4.43E-15  | Trypsin, alkaline C; similar with TRYC_MANSE                |
| Px009322.1 | -1.7596 | 1.89E-98  | 5.11E-97  | Unknown functio                                             |
| Px015279.1 | -1.5306 | 1.85E-04  | 5.19E-04  | Trypsin, alkaline A; similar with TRYA_MANSE                |
| Px006532.1 | -1.3578 | 1.19E-126 | 3.83E-125 | Eukaryotic translation initiation factor 2 subunit 1        |
| Px001559.1 | -1.3250 | 2.05E-07  | 8.24E-07  | Unknown functio                                             |
| Px002440.1 | -1.1249 | 5.69E-06  | 1.96E-05  | Trypsin, alkaline B; similar with TRYB_MANSE                |
| Px012579.1 | -1.1226 | 3.09E-34  | 3.92E-33  | mRNA export factor; similar with RAEL1_PIG                  |

### Involved in protein digestion and absorption

|            |        |           |           |                                                       |
|------------|--------|-----------|-----------|-------------------------------------------------------|
| Px005242.1 | 3.0767 | 6.37E-17  | 4.80E-16  | Trypsin CFT-1; similar with TRYP_CHOFU                |
| Px007621.1 | 3.0027 | 5.16E-07  | 2.00E-06  | Trypsin CFT-1; similar with TRYP_CHOFU                |
| Px007357.2 | 2.9638 | 0.00E+00  | 0.00E+00  | Serine proteinase stubble; similar with STUB_DROME    |
| Px017492.1 | 2.9247 | 3.48E-05  | 1.08E-04  | Trypsin CFT-1; similar with TRYP_CHOFU                |
| Px005241.1 | 2.8923 | 3.63E-27  | 3.87E-26  | Trypsin CFT-1; similar with TRYP_CHOFU                |
| Px007617.1 | 2.8498 | 1.67E-246 | 8.96E-245 | Trypsin CFT-1; similar with TRYP_CHOFU                |
| Px000992.1 | 2.7356 | 0.00E+00  | 0.00E+00  | Carboxypeptidase A1; similar with CBPA1_BOVIN         |
| Px014882.1 | 2.6696 | 8.90E-26  | 9.20E-25  | Trypsin, alkaline C; similar with TRYC_MANSE          |
| Px008830.1 | 2.5145 | 3.44E-20  | 2.93E-19  | Trypsin, alkaline C; similar with TRYC_MANSE          |
| Px001804.1 | 2.4772 | 1.61E-09  | 7.81E-09  | Trypsin, alkaline B; similar with TRYB_MANSE          |
| Px005243.1 | 2.4179 | 0.00E+00  | 0.00E+00  | Trypsin, alkaline A; similar with TRYA_MANSE          |
| Px009569.1 | 2.3697 | 7.48E-240 | 3.88E-238 | Trypsin CFT-1; similar with TRYP_CHOFU                |
| Px007616.1 | 2.3535 | 1.02E-74  | 2.30E-73  | Trypsin CFT-1; similar with TRYP_CHOFU                |
| Px007618.1 | 2.2331 | 1.62E-143 | 5.75E-142 | Trypsin CFT-1; similar with TRYP_CHOFU                |
| Px000402.2 | 2.2104 | 2.09E-62  | 4.14E-61  | Serine protease persephone; similar with PSH_DROME    |
| Px014592.1 | 2.1944 | 1.03E-24  | 1.02E-23  | Trypsin CFT-1; similar with TRYP_CHOFU                |
| Px002512.1 | 2.1941 | 1.00E-35  | 1.30E-34  | Brachyurin; similar with COGS_UCAPU                   |
| Px006571.1 | 2.1935 | 0.00E+00  | 0.00E+00  | Trypsin, alkaline B; similar with TRYB_MANSE          |
| Px010627.1 | 2.1698 | 0.00E+00  | 0.00E+00  | Wing disc-specific protein; similar with Q8WPH2_BOMMO |
| Px005328.1 | 2.1424 | 1.21E-73  | 2.72E-72  | Tubulin-specific chaperone cofactor E-like protein    |
| Px016057.1 | 2.1333 | 4.30E-39  | 5.93E-38  | Trypsin, alkaline B; similar with TRYB_MANSE          |
| Px001239.1 | 2.0005 | 4.17E-33  | 5.19E-32  | Serine protease P162; similar with D2A5Y8_TRICA       |
| Px010386.1 | 1.9598 | 3.91E-233 | 1.99E-231 | Trypsin CFT-1; similar with TRYP_CHOFU                |
| Px015275.1 | 1.9447 | 0.00E+00  | 0.00E+00  | Trypsin CFT-1; similar with TRYP_CHOFU                |
| Px005244.1 | 1.9247 | 6.69E-08  | 2.82E-07  | Trypsin CFT-1; similar with TRYP_CHOFU                |
| Px015277.1 | 1.8808 | 1.20E-25  | 1.23E-24  | Trypsin CFT-1; similar with TRYP_CHOFU                |
| Px013377.1 | 1.8477 | 2.46E-41  | 3.55E-40  | Trypsin; similar with TRYP_PHACE                      |
| Px007619.2 | 1.7921 | 0.00E+00  | 0.00E+00  | Trypsin, alkaline A; similar with TRYA_MANSE          |
| Px012048.1 | 1.7891 | 2.09E-29  | 2.38E-28  | Chymotrypsin BI; similar with CTRB1_LITVA             |
| Px011886.1 | 1.7454 | 1.59E-62  | 3.15E-61  | Trypsin CFT-1; similar with TRYP_CHOFU                |

|            |         |           |           |                                                             |
|------------|---------|-----------|-----------|-------------------------------------------------------------|
| Px000991.6 | 1.7324  | 1.37E-46  | 2.20E-45  | Carboxypeptidase O; similar with CBPO_BOVIN                 |
| Px007674.2 | 1.7282  | 5.92E-240 | 3.08E-238 | Collagenase; similar with COGS_HYPLI                        |
| Px005238.1 | 1.7135  | 3.84E-20  | 3.26E-19  | Trypsin, alkaline B; similar with TRYB_MANSE                |
| Px012568.1 | 1.7128  | 3.61E-103 | 1.02E-101 | Trypsin CFT-1; similar with TRYP_CHOFU                      |
| Px013162.1 | 1.6859  | 3.98E-103 | 1.12E-101 | Serine protease snake; similar with SNAK_DROME              |
| Px000995.2 | 1.6774  | 3.14E-184 | 1.31E-182 | Carboxypeptidase A4; similar with CBPA4_HUMAN               |
| Px016055.1 | 1.6104  | 9.12E-07  | 3.45E-06  | Trypsin, alkaline C; similar with TRYC_MANSE                |
| Px009638.1 | 1.5712  | 0.00E+00  | 0.00E+00  | Trypsin, alkaline B; similar with TRYB_MANSE                |
| Px002866.1 | 1.5483  | 8.45E-05  | 2.49E-04  | Trypsin, alkaline A; similar with TRYA_MANSE                |
| Px001833.1 | 1.5360  | 1.24E-301 | 7.61E-300 | Serine protease easter; similar with EAST_DROME             |
| Px002441.1 | 1.5324  | 9.72E-35  | 1.25E-33  | Trypsin, alkaline B; similar with TRYB_MANSE                |
| Px000107.1 | 1.5230  | 1.38E-223 | 6.76E-222 | Trypsin, alkaline C; similar with TRYC_MANSE                |
| Px006572.1 | 1.5222  | 0.00E+00  | 0.00E+00  | Trypsin; similar with TRYP_PHACE                            |
| Px004947.1 | 1.5156  | 2.31E-09  | 1.11E-08  | Proton-coupled amino acid transporter 4                     |
| Px005239.1 | 1.5039  | 3.47E-65  | 7.08E-64  | Trypsin, alkaline A; similar with TRYA_MANSE                |
| Px002861.1 | 1.5031  | 0.00E+00  | 0.00E+00  | Trypsin, alkaline C; similar with TRYC_MANSE                |
| Px011889.1 | 1.4989  | 1.23E-05  | 4.08E-05  | Achelase-1; similar with ACH1_LONAC                         |
| Px000993.1 | 1.4934  | 0.00E+00  | 0.00E+00  | Carboxypeptidase A2; similar with CBPA2_RAT                 |
| Px011499.2 | 1.4297  | 2.51E-12  | 1.48E-11  | Serine protease persephone; similar with PSH_DROME          |
| Px016056.1 | 1.4149  | 0.00E+00  | 0.00E+00  | Trypsin, alkaline A; similar with TRYA_MANSE                |
| Px007900.1 | 1.3608  | 0.00E+00  | 0.00E+00  | Chymotrypsin BI; similar with CTRB1_LITVA                   |
| Px002864.1 | 1.3149  | 1.41E-13  | 8.90E-13  | Trypsin, alkaline B; similar with TRYB_MANSE                |
| Px005604.1 | 1.3142  | 3.78E-19  | 3.08E-18  | Monocarboxylate transporter 10; similar with MOT10_MOUSE    |
| Px011737.1 | 1.3022  | 0.00E+00  | 0.00E+00  | Neurofilament heavy polypeptide; similar with NFH_MOUSE     |
| Px002792.1 | 1.2920  | 7.53E-26  | 7.80E-25  | Unknown functio                                             |
| Px002540.1 | 1.2876  | 1.80E-19  | 1.49E-18  | Proton-coupled amino acid transporter 4                     |
| Px008960.1 | 1.2616  | 6.61E-37  | 8.79E-36  | Peptide transporter family 1; similar with PEPT1_DROME      |
| Px013646.1 | 1.2335  | 7.74E-16  | 5.53E-15  | Proton-coupled amino acid transporter 4                     |
| Px009566.1 | 1.2291  | 1.92E-62  | 3.79E-61  | Trypsin, alkaline C; similar with TRYC_MANSE                |
| Px008882.1 | 1.2281  | 6.01E-123 | 1.88E-121 | Unknown functio                                             |
| Px012067.1 | 1.2111  | 7.18E-07  | 2.75E-06  | Proton-coupled amino acid transporter 4                     |
| Px015791.1 | 1.1914  | 1.59E-08  | 7.06E-08  | Sodium/potassium-transporting ATPase subunit beta-1         |
| Px004330.1 | 1.1861  | 4.87E-44  | 7.38E-43  | Proton-coupled amino acid transporter 1                     |
| Px005342.1 | 1.1769  | 1.93E-52  | 3.38E-51  | Collagenase; similar with COGS_HYPLI                        |
| Px009639.1 | 1.1592  | 0.00E+00  | 0.00E+00  | Trypsin CFT-1; similar with TRYP_CHOFU                      |
| Px005739.1 | 1.1553  | 1.10E-15  | 7.78E-15  | Putative uncharacterized protein; similar with BOW6E4_CULQU |
| Px003670.2 | 1.1149  | 0.00E+00  | 0.00E+00  | Serine protease easter; similar with EAST_DROME             |
| Px008393.1 | 1.1138  | 3.51E-06  | 1.24E-05  | Nck-associated protein 5; similar with NCKP5_HUMAN          |
| Px006570.1 | 1.1073  | 0.00E+00  | 0.00E+00  | Trypsin, alkaline B; similar with TRYB_MANSE                |
| Px007601.1 | 1.1017  | 1.31E-16  | 9.72E-16  | Chymotrypsin-1; similar with CTR1_ANOGA                     |
| Px016307.3 | 1.0876  | 1.22E-104 | 3.47E-103 | Sodium/potassium-transporting ATPase subunit alpha          |
| Px002572.2 | 1.0850  | 2.97E-25  | 3.01E-24  | Large proline-rich protein bag6-A; similar with BAG6A_XENLA |
| Px010855.1 | 1.0588  | 6.22E-09  | 2.89E-08  | Trypsin, alkaline A; similar with TRYA_MANSE                |
| Px017515.1 | 1.0202  | 4.47E-23  | 4.19E-22  | Trypsin, alkaline C; similar with TRYC_MANSE                |
| Px000994.1 | 1.0157  | 0.00E+00  | 0.00E+00  | Zinc carboxypeptidase A 1; similar with CBPA1_DROPS         |
| Px000996.2 | 1.0153  | 2.16E-05  | 6.93E-05  | Carboxypeptidase A2; similar with CBPA2_MOUSE               |
| Px005936.2 | 1.0100  | 2.58E-14  | 1.70E-13  | Trypsin, alkaline C; similar with TRYC_MANSE                |
| Px011887.1 | 1.0083  | 4.45E-16  | 3.21E-15  | Trypsin, alkaline C; similar with TRYC_MANSE                |
| Px000191.1 | -8.8435 | 3.73E-04  | 9.91E-04  | Trypsin-4; similar with TRY4_ANOGA                          |
| Px008989.1 | -4.8302 | 9.70E-08  | 4.03E-07  | Trypsin CFT-1; similar with TRYP_CHOFU                      |
| Px001674.1 | -3.5040 | 1.12E-30  | 1.32E-29  | Cuticular protein CPG7; similar with B2DBG1_9NEOP           |
| Px000267.1 | -3.2452 | 8.15E-08  | 3.41E-07  | Zinc metalloproteinase nas-15; similar with NAS15_CAEEL     |
| Px001990.2 | -2.4252 | 2.16E-214 | 9.99E-213 | Carboxypeptidase B; similar with CBPB_ASTFL                 |
| Px014636.1 | -2.1712 | 8.11E-09  | 3.72E-08  | Trypsin-1; similar with TRY1_ANOGA                          |

|            |         |          |          |                                                          |
|------------|---------|----------|----------|----------------------------------------------------------|
| Px005373.1 | -1.8302 | 1.62E-09 | 7.87E-09 | Carboxypeptidase B; similar with CBPB_ASTFL              |
| Px002588.1 | -1.7813 | 6.19E-16 | 4.43E-15 | Trypsin, alkaline C; similar with TRYC_MANSE             |
| Px015279.1 | -1.5306 | 1.85E-04 | 5.19E-04 | Trypsin, alkaline A; similar with TRYA_MANSE             |
| Px012323.1 | -1.3989 | 2.47E-15 | 1.73E-14 | Lysine histidine transporter 1; similar with LHT1_ARATH  |
| Px012129.1 | -1.2754 | 4.68E-19 | 3.82E-18 | Lysosomal Pro-X carboxypeptidase; similar with PCP_PONAB |
| Px008408.1 | -1.2190 | 8.68E-14 | 5.53E-13 | Ras-related protein RabJ; similar with E2C0I8_9HYME      |
| Px003112.1 | -1.1686 | 3.03E-04 | 8.21E-04 | Collagen alpha-1(XV) chain; similar with COFA1_MOUSE     |
| Px001226.2 | -1.1578 | 4.15E-18 | 3.25E-17 | Collagen alpha-2(I) chain; similar with CO1A2_RAT        |
| Px002440.1 | -1.1249 | 5.69E-06 | 1.96E-05 | Trypsin, alkaline B; similar with TRYB_MANSE             |
| Px007681.2 | -1.0735 | 2.17E-05 | 6.95E-05 | Monocarboxylate transporter 2; similar with MOT2_RAT     |
| Px004618.2 | -1.0610 | 8.78E-52 | 1.51E-50 | Vesicular inhibitory amino acid transporter              |

### Involved in apoptosis

|            |         |          |          |                                                                                |
|------------|---------|----------|----------|--------------------------------------------------------------------------------|
| Px008374.1 | 10.1228 | 1.11E-04 | 3.21E-04 | Phosphatidylinositol-4,5-bisphosphate 3-kinase catalytic subunit delta isoform |
| Px012662.1 | 2.9772  | 2.07E-05 | 6.66E-05 | cAMP-dependent protein kinase type II regulatory subunit                       |
| Px002283.1 | 2.4843  | 2.38E-57 | 4.44E-56 | Apoptosis-inducing factor 3; similar with AIFM3_HUMAN                          |
| Px006837.1 | 2.4520  | 3.28E-29 | 3.72E-28 | Serine/threonine-protein kinase pelle; similar with KPEL_DROME                 |
| Px008372.1 | 2.4177  | 3.42E-08 | 1.48E-07 | Phosphatidylinositol-4,5-bisphosphate 3-kinase catalytic subunit beta isoform  |
| Px009987.1 | 2.1996  | 6.07E-12 | 3.49E-11 | Caspase-1; similar with CASP1_DROME                                            |
| Px003725.1 | 2.1160  | 5.10E-66 | 1.05E-64 | Interleukin-1 receptor-associated kinase 4                                     |
| Px003186.1 | 2.0295  | 2.84E-71 | 6.21E-70 | RAC serine/threonine-protein kinase; similar with AKT1_DROME                   |
| Px010499.1 | 1.9100  | 1.29E-36 | 1.70E-35 | Serine/threonine-protein kinase pelle; similar with KPEL_DROME                 |
| Px009688.1 | 1.7268  | 2.61E-05 | 8.28E-05 | Putative apoptosis-inducing factor 1, mitochondrial                            |
| Px012893.1 | 1.5996  | 1.14E-20 | 9.85E-20 | Putative apoptosis-inducing factor 1, mitochondrial                            |
| Px015514.1 | 1.4407  | 7.97E-06 | 2.69E-05 | Serine/threonine-protein kinase pelle; similar with KPEL_DROME                 |
| Px009351.1 | 1.4222  | 1.66E-04 | 4.71E-04 | DNA fragmentation factor subunit beta; similar with DFFB_RAT                   |
| Px009586.1 | 1.4046  | 1.13E-06 | 4.22E-06 | Phosphatidylinositol 3-kinase regulatory subunit gamma                         |
| Px016244.2 | 1.3330  | 9.62E-36 | 1.26E-34 | Calcium and integrin-binding family member 2                                   |
| Px013159.1 | 1.2799  | 2.29E-07 | 9.21E-07 | Calcium-binding protein p22; similar with CHP1_RAT                             |
| Px002608.1 | 1.2583  | 1.73E-12 | 1.03E-11 | Protein kinase DC2; similar with KDC2_DROME                                    |
| Px005490.1 | 1.2205  | 5.89E-39 | 8.08E-38 | Inhibitor of nuclear factor kappa-B kinase subunit beta                        |
| Px008798.1 | 1.1684  | 3.42E-59 | 6.55E-58 | Serine/threonine-protein phosphatase 2B catalytic subunit 3                    |
| Px008031.1 | 1.1629  | 2.57E-04 | 7.03E-04 | cAMP-dependent protein kinase catalytic subunit alpha                          |
| Px002728.1 | 1.0196  | 6.50E-19 | 5.27E-18 | Calcium and integrin-binding family member 2                                   |
| Px004548.2 | -1.0947 | 1.89E-20 | 1.63E-19 | Putative apoptosis-inducing factor 1, mitochondrial                            |

### Involved in glycerophospholipid metabolism

|            |        |           |           |                                                                 |
|------------|--------|-----------|-----------|-----------------------------------------------------------------|
| Px009476.1 | 4.3986 | 3.12E-06  | 1.11E-05  | Group 3 secretory phospholipase A2; similar with PA2G3_BOVIN    |
| Px014969.1 | 4.0027 | 9.70E-05  | 2.83E-04  | Glycerol-3-phosphate acyltransferase 3                          |
| Px012694.3 | 3.5448 | 5.62E-16  | 4.03E-15  | Lipase 1; similar with LIP1_DROME                               |
| Px016285.1 | 3.3986 | 2.09E-05  | 6.73E-05  | Tafazzin homolog; similar with TAZ_DROME                        |
| Px011234.1 | 3.0096 | 2.31E-17  | 1.77E-16  | Nose resistant to fluoxetine protein 6; similar with NRF6_CAEEL |
| Px003942.1 | 2.6934 | 1.55E-07  | 6.31E-07  | Choline/ethanolaminephosphotransferase 1                        |
| Px002585.2 | 2.6652 | 1.09E-28  | 1.22E-27  | Nose resistant to fluoxetine protein 6; similar with NRF6_CAEEL |
| Px012696.1 | 2.6414 | 1.16E-90  | 2.93E-89  | Lipase 3; similar with LIP3_DROME                               |
| Px009569.1 | 2.3697 | 7.48E-240 | 3.88E-238 | Trypsin CFT-1; similar with TRYP_CHOFU                          |
| Px008913.1 | 2.3454 | 0.00E+00  | 0.00E+00  | Acetylcholinesterase; similar with ACES_CULPI                   |
| Px011477.2 | 2.3341 | 5.77E-119 | 1.80E-117 | Lipase 1; similar with LIP1_DROME                               |
| Px013101.1 | 2.2142 | 7.92E-05  | 2.35E-04  | Nose resistant to fluoxetine protein 6; similar with NRF6_CAEEL |
| Px011788.2 | 2.1319 | 2.40E-67  | 5.04E-66  | Pancreatic lipase-related protein 2; similar with LIPR2_BOVIN   |
| Px005805.1 | 2.1005 | 1.53E-07  | 6.25E-07  | Lipase 1; similar with LIP1_DROME                               |
| Px006720.1 | 1.9247 | 2.21E-05  | 7.08E-05  | Glycerol-3-phosphate acyltransferase 4                          |
| Px006345.1 | 1.7781 | 1.52E-87  | 3.77E-86  | Pancreatic lipase-related protein 2; similar with LIPR2_MYOCO   |
| Px004131.5 | 1.7548 | 8.64E-41  | 1.23E-39  | Calcium-independent phospholipase A2-gamma                      |

|            |         |           |           |                                                                 |
|------------|---------|-----------|-----------|-----------------------------------------------------------------|
| Px004753.1 | 1.7057  | 1.64E-52  | 2.88E-51  | Pancreatic lipase-related protein 2; similar with LIPR2_MYOCO   |
| Px004662.1 | 1.6826  | 3.08E-13  | 1.91E-12  | Lipase 1; similar with LIP1_DROME                               |
| Px001937.2 | 1.6560  | 5.20E-133 | 1.73E-131 | Phosphatidate phosphatase LPIN2; similar with LPIN2_MOUSE       |
| Px013003.3 | 1.5799  | 1.02E-12  | 6.16E-12  | Neuropathy target esterase sws; similar with SWS_DROSE          |
| Px017196.1 | 1.5696  | 1.86E-21  | 1.66E-20  | Choline/ethanolamine kinase; similar with CHKB_HUMAN            |
| Px011049.1 | 1.5512  | 8.68E-06  | 2.92E-05  | Acetylcholinesterase; similar with ACES_FELCA                   |
| Px009940.2 | 1.4584  | 2.00E-08  | 8.84E-08  | Acetylcholinesterase; similar with ACES_CULPI                   |
| Px003712.1 | 1.4525  | 1.46E-09  | 7.13E-09  | Acetylcholinesterase; similar with ACES_CULPI                   |
| Px006262.1 | 1.4414  | 4.21E-28  | 4.61E-27  | Lipase 3; similar with LIP3_DROME                               |
| Px004752.1 | 1.3734  | 0.00E+00  | 0.00E+00  | Pancreatic lipase-related protein 2; similar with LIPR2_BOVIN   |
| Px012695.1 | 1.3457  | 1.30E-14  | 8.69E-14  | Lipase 1; similar with LIP1_DROME                               |
| Px002296.1 | 1.3429  | 6.45E-75  | 1.45E-73  | Pancreatic triacylglycerol lipase; similar with LIPP_HUMAN      |
| Px000371.1 | 1.2993  | 0.00E+00  | 0.00E+00  | Lipase 1; similar with LIP1_DROME                               |
| Px009674.1 | 1.2991  | 5.95E-05  | 1.80E-04  | N-alpha-acetyltransferase 40, NatD catalytic subunit            |
| Px016094.1 | 1.2718  | 1.65E-05  | 5.39E-05  | Group XV phospholipase A2; similar with PAG15_MOUSE             |
| Px010099.1 | 1.2634  | 5.64E-17  | 4.26E-16  | Phospholipase D1; similar with PLD1_RAT                         |
| Px005193.2 | 1.2375  | 6.57E-27  | 6.96E-26  | Pancreatic lipase-related protein 2; similar with LIPR2_MYOCO   |
| Px005646.1 | 1.2204  | 7.68E-07  | 2.93E-06  | Nose resistant to fluoxetine protein 6; similar with NRF6_CAEEL |
| Px005804.1 | 1.1870  | 2.65E-10  | 1.37E-09  | Lipase 1; similar with LIP1_DROME                               |
| Px011790.1 | 1.1858  | 3.36E-08  | 1.46E-07  | Phosphatidylserine decarboxylase proenzyme                      |
| Px001894.8 | 1.1698  | 4.31E-20  | 3.65E-19  | Ethanolamine-phosphate cytidyltransferase                       |
| Px004750.1 | 1.1637  | 0.00E+00  | 0.00E+00  | Pancreatic lipase-related protein 2; similar with LIPR2_RAT     |
| Px017144.1 | 1.1569  | 1.61E-04  | 4.58E-04  | 1-acyl-sn-glycerol-3-phosphate acyltransferase beta             |
| Px003579.1 | 1.1214  | 2.54E-20  | 2.17E-19  | Glycerol-3-phosphate acyltransferase 1, mitochondrial           |
| Px008093.1 | 1.0740  | 2.58E-22  | 2.36E-21  | Nose resistant to fluoxetine protein 6; similar with NRF6_CAEEL |
| Px011476.1 | 1.0679  | 1.93E-04  | 5.39E-04  | Lipase 3; similar with LIP3_DROME                               |
| Px002295.1 | 1.0591  | 2.25E-92  | 5.79E-91  | Pancreatic lipase-related protein 2; similar with LIPR2_BOVIN   |
| Px004200.1 | 1.0183  | 4.72E-21  | 4.15E-20  | Putative phosphatidate phosphatase; similar with WUN_DROME      |
| Px016246.1 | -9.0336 | 3.73E-04  | 9.91E-04  | Unknown functio                                                 |
| Px000102.1 | -1.8916 | 1.29E-32  | 1.57E-31  | Pancreatic lipase-related protein 3; similar with LIPR3_HUMAN   |
| Px009691.1 | -1.7400 | 2.15E-07  | 8.65E-07  | Lipase 1; similar with LIP1_DROME                               |
| Px011624.1 | -1.5253 | 7.85E-07  | 2.99E-06  | Nose resistant to fluoxetine protein 6; similar with NRF6_CAEEL |
| Px006923.1 | -1.4676 | 1.27E-24  | 1.25E-23  | Glycerophosphoryl diester phosphodiesterase                     |
| Px004201.1 | -1.2925 | 3.87E-106 | 1.11E-104 | Putative phosphatidate phosphatase; similar with WUN_DROME      |

### Involved in VEGF signaling pathway

|            |         |          |          |                                                                                |
|------------|---------|----------|----------|--------------------------------------------------------------------------------|
| Px008374.1 | 10.1228 | 1.11E-04 | 3.21E-04 | Phosphatidylinositol-4,5-bisphosphate 3-kinase catalytic subunit delta isoform |
| Px009476.1 | 4.3986  | 3.12E-06 | 1.11E-05 | Group 3 secretory phospholipase A2; similar with PA2G3_BOVIN                   |
| Px014687.1 | 2.9086  | 1.32E-27 | 1.42E-26 | Putative uncharacterized protein GLEAN_08148                                   |
| Px005596.1 | 2.7721  | 1.45E-36 | 1.92E-35 | FERM and PDZ domain-containing protein 4                                       |
| Px006086.2 | 2.6617  | 3.04E-05 | 9.56E-05 | Uncharacterized protein K02A2.6; similar with YRD6_CAEEL                       |
| Px008372.1 | 2.4177  | 3.42E-08 | 1.48E-07 | Phosphatidylinositol-4,5-bisphosphate 3-kinase catalytic subunit beta isoform  |
| Px014553.1 | 2.1507  | 7.24E-12 | 4.15E-11 | Mitogen-activated protein kinase ERK-A                                         |
| Px003186.1 | 2.0295  | 2.84E-71 | 6.21E-70 | RAC serine/threonine-protein kinase; similar with AKT1_DROME                   |
| Px013699.1 | 1.9424  | 2.80E-20 | 2.40E-19 | GG17798; similar with B3NWL4_DROER                                             |
| Px010399.1 | 1.8633  | 2.33E-07 | 9.35E-07 | Sphingosine kinase 2; similar with SPHK2_MOUSE                                 |
| Px000138.1 | 1.8328  | 1.68E-04 | 4.76E-04 | Mitogen-activated protein kinase ERK-A                                         |
| Px006878.1 | 1.7943  | 2.54E-04 | 6.97E-04 | Protein kinase C, brain isozyme; similar with KPC1_DROME                       |
| Px004131.5 | 1.7548  | 8.64E-41 | 1.23E-39 | Calcium-independent phospholipase A2-gamma                                     |
| Px015426.1 | 1.5443  | 1.62E-09 | 7.88E-09 | MAP kinase-activated protein kinase 2                                          |
| Px003232.1 | 1.4984  | 1.17E-10 | 6.25E-10 | 1-phosphatidylinositol-4,5-bisphosphate phosphodiesterase gamma-1              |
| Px009586.1 | 1.4046  | 1.13E-06 | 4.22E-06 | Phosphatidylinositol 3-kinase regulatory subunit gamma                         |
| Px016244.2 | 1.3330  | 9.62E-36 | 1.26E-34 | Calcium and integrin-binding family member 2                                   |
| Px013159.1 | 1.2799  | 2.29E-07 | 9.21E-07 | Calcium-binding protein p22; similar with CHP1_RAT                             |

|            |        |          |          |                                                             |
|------------|--------|----------|----------|-------------------------------------------------------------|
| Px005140.1 | 1.2596 | 1.46E-06 | 5.39E-06 | Focal adhesion kinase 1; similar with FAK1_RAT              |
| Px008581.1 | 1.2495 | 4.68E-15 | 3.23E-14 | PDZ and LIM domain protein Zasp; similar with ZASP_DROME    |
| Px008798.1 | 1.1684 | 3.42E-59 | 6.55E-58 | Serine/threonine-protein phosphatase 2B catalytic subunit 3 |
| Px015291.1 | 1.1344 | 1.11E-12 | 6.70E-12 | Mitogen-activated protein kinase 14B                        |
| Px015010.1 | 1.0950 | 1.19E-43 | 1.79E-42 | Heat shock protein beta-1; similar with HSPB1_CHICK         |
| Px008584.1 | 1.0409 | 6.82E-98 | 1.83E-96 | PDZ and LIM domain protein Zasp; similar with ZASP_DROME    |
| Px002728.1 | 1.0196 | 6.50E-19 | 5.27E-18 | Calcium and integrin-binding family member 2                |

### Involved in glycerolipid metabolism

|            |        |           |           |                                                               |
|------------|--------|-----------|-----------|---------------------------------------------------------------|
| Px016415.1 | 9.5474 | 6.00E-05  | 1.81E-04  | Alcohol dehydrogenase [NADP+] A; similar with A1A1A_DANRE     |
| Px014969.1 | 4.0027 | 9.70E-05  | 2.83E-04  | Glycerol-3-phosphate acyltransferase 3                        |
| Px002516.1 | 3.9642 | 2.70E-08  | 1.18E-07  | Glycerol kinase; similar with GLPK_RAT                        |
| Px008089.1 | 3.9186 | 0.00E+00  | 0.00E+00  | Pancreatic lipase-related protein 2; similar with LIPR2_CAVPO |
| Px012694.3 | 3.5448 | 5.62E-16  | 4.03E-15  | Lipase 1; similar with LIP1_DROME                             |
| Px006441.1 | 2.6454 | 0.00E+00  | 0.00E+00  | Lipase member H; similar with LIPH_RAT                        |
| Px012696.1 | 2.6414 | 1.16E-90  | 2.93E-89  | Lipase 3; similar with LIP3_DROME                             |
| Px016623.1 | 2.6198 | 4.98E-08  | 2.12E-07  | Putative glycerol kinase 3; similar with GLPK3_HUMAN          |
| Px011683.2 | 2.4698 | 9.12E-191 | 3.91E-189 | Venom carboxylesterase-6; similar with EST6_APIME             |
| Px001456.1 | 2.3739 | 1.19E-96  | 3.15E-95  | Gastric triacylglycerol lipase; similar with LIPG_RAT         |
| Px000104.1 | 2.3695 | 6.34E-13  | 3.87E-12  | Pancreatic lipase-related protein 2; similar with LIPR2_CAVPO |
| Px011477.2 | 2.3341 | 5.77E-119 | 1.80E-117 | Lipase 1; similar with LIP1_DROME                             |
| Px008088.2 | 2.3204 | 0.00E+00  | 0.00E+00  | Lipoprotein lipase; similar with LIPL_CAVPO                   |
| Px011788.2 | 2.1319 | 2.40E-67  | 5.04E-66  | Pancreatic lipase-related protein 2; similar with LIPR2_BOVIN |
| Px005876.1 | 2.1186 | 1.17E-33  | 1.47E-32  | Patatin-like phospholipase domain-containing protein 2        |
| Px005805.1 | 2.1005 | 1.53E-07  | 6.25E-07  | Lipase 1; similar with LIP1_DROME                             |
| Px006720.1 | 1.9247 | 2.21E-05  | 7.08E-05  | Glycerol-3-phosphate acyltransferase 4                        |
| Px006440.1 | 1.8690 | 1.16E-34  | 1.49E-33  | Phospholipase A1 member A; similar with PLA1A_HUMAN           |
| Px006345.1 | 1.7781 | 1.52E-87  | 3.77E-86  | Pancreatic lipase-related protein 2; similar with LIPR2_MYOCO |
| Px004753.1 | 1.7057 | 1.64E-52  | 2.88E-51  | Pancreatic lipase-related protein 2; similar with LIPR2_MYOCO |
| Px003649.1 | 1.6988 | 0.00E+00  | 0.00E+00  | Esterase FE4; similar with ESTF_MYZPE                         |
| Px004662.1 | 1.6826 | 3.08E-13  | 1.91E-12  | Lipase 1; similar with LIP1_DROME                             |
| Px001937.2 | 1.6560 | 5.20E-133 | 1.73E-131 | Phosphatidate phosphatase LPIN2; similar with LPIN2_MOUSE     |
| Px000132.1 | 1.5548 | 2.39E-41  | 3.44E-40  | FGGY carbohydrate kinase domain-containing protein            |
| Px011049.1 | 1.5512 | 8.68E-06  | 2.92E-05  | Acetylcholinesterase; similar with ACES_FELCA                 |
| Px009940.2 | 1.4584 | 2.00E-08  | 8.84E-08  | Acetylcholinesterase; similar with ACES_CULPI                 |
| Px003712.1 | 1.4525 | 1.46E-09  | 7.13E-09  | Acetylcholinesterase; similar with ACES_CULPI                 |
| Px006262.1 | 1.4414 | 4.21E-28  | 4.61E-27  | Lipase 3; similar with LIP3_DROME                             |
| Px013239.1 | 1.4393 | 8.23E-07  | 3.13E-06  | Putative glycerol kinase 3; similar with GLPK3_HUMAN          |
| Px000496.1 | 1.3885 | 8.80E-48  | 1.44E-46  | Putative aldehyde dehydrogenase family 7 member A1 homolog    |
| Px004752.1 | 1.3734 | 0.00E+00  | 0.00E+00  | Pancreatic lipase-related protein 2; similar with LIPR2_BOVIN |
| Px000515.1 | 1.3647 | 1.85E-27  | 1.99E-26  | Esterase FE4; similar with ESTF_MYZPE                         |
| Px012695.1 | 1.3457 | 1.30E-14  | 8.69E-14  | Lipase 1; similar with LIP1_DROME                             |
| Px002296.1 | 1.3429 | 6.45E-75  | 1.45E-73  | Pancreatic triacylglycerol lipase; similar with LIPP_HUMAN    |
| Px000371.1 | 1.2993 | 0.00E+00  | 0.00E+00  | Lipase 1; similar with LIP1_DROME                             |
| Px006008.1 | 1.2918 | 8.39E-47  | 1.35E-45  | Alcohol dehydrogenase [NADP+]; similar with AK1A1_HUMAN       |
| Px011443.1 | 1.2632 | 1.85E-11  | 1.03E-10  | Esterase FE4; similar with ESTF_MYZPE                         |
| Px005193.2 | 1.2375 | 6.57E-27  | 6.96E-26  | Pancreatic lipase-related protein 2; similar with LIPR2_MYOCO |
| Px012939.1 | 1.2048 | 1.82E-08  | 8.07E-08  | Protein turtle; similar with TUTL_DROME                       |
| Px004571.1 | 1.2039 | 8.31E-100 | 2.29E-98  | Aldose reductase; similar with ALDR_BOVIN                     |
| Px005804.1 | 1.1870 | 2.65E-10  | 1.37E-09  | Lipase 1; similar with LIP1_DROME                             |
| Px004750.1 | 1.1637 | 0.00E+00  | 0.00E+00  | Pancreatic lipase-related protein 2; similar with LIPR2_RAT   |
| Px017144.1 | 1.1569 | 1.61E-04  | 4.58E-04  | 1-acyl-sn-glycerol-3-phosphate acyltransferase beta           |
| Px011727.1 | 1.1383 | 4.42E-23  | 4.15E-22  | Protein GCY; similar with GCY_YEAST                           |
| Px017996.1 | 1.1300 | 3.04E-23  | 2.87E-22  | Acetylcholinesterase; similar with ACES_HUMAN                 |

|            |         |           |           |                                                               |
|------------|---------|-----------|-----------|---------------------------------------------------------------|
| Px003579.1 | 1.1214  | 2.54E-20  | 2.17E-19  | Glycerol-3-phosphate acyltransferase 1, mitochondrial         |
| Px011476.1 | 1.0679  | 1.93E-04  | 5.39E-04  | Lipase 3; similar with LIP3_DROME                             |
| Px002295.1 | 1.0591  | 2.25E-92  | 5.79E-91  | Pancreatic lipase-related protein 2; similar with LIPR2_BOVIN |
| Px002733.2 | 1.0202  | 2.01E-161 | 7.66E-160 | Aldehyde dehydrogenase, dimeric NADP-preferring               |
| Px004200.1 | 1.0183  | 4.72E-21  | 4.15E-20  | Putative phosphatidate phosphatase; similar with WUN_DROME    |
| Px013493.2 | -9.3785 | 3.73E-04  | 9.91E-04  | Pancreatic lipase-related protein 2; similar with LIPR2_MYOCO |
| Px016246.1 | -9.0336 | 3.73E-04  | 9.91E-04  | Unknown functio                                               |
| Px000102.1 | -1.8916 | 1.29E-32  | 1.57E-31  | Pancreatic lipase-related protein 3; similar with LIPR3_HUMAN |
| Px009691.1 | -1.7400 | 2.15E-07  | 8.65E-07  | Lipase 1; similar with LIP1_DROME                             |
| Px004201.1 | -1.2925 | 3.87E-106 | 1.11E-104 | Putative phosphatidate phosphatase; similar with WUN_DROME    |
| Px012677.1 | -1.2183 | 2.47E-04  | 6.79E-04  | Lipase member H-A; similar with LIPHA_XENLA                   |
| Px004655.2 | -1.0214 | 4.12E-49  | 6.87E-48  | Aldo-keto reductase family 1 member C18                       |

### Involved in fat digestion and absorption

|            |        |           |           |                                                               |
|------------|--------|-----------|-----------|---------------------------------------------------------------|
| Px009476.1 | 4.3986 | 3.12E-06  | 1.11E-05  | Group 3 secretory phospholipase A2; similar with PA2G3_BOVIN  |
| Px008089.1 | 3.9186 | 0.00E+00  | 0.00E+00  | Pancreatic lipase-related protein 2; similar with LIPR2_CAVPO |
| Px012694.3 | 3.5448 | 5.62E-16  | 4.03E-15  | Lipase 1; similar with LIP1_DROME                             |
| Px006441.1 | 2.6454 | 0.00E+00  | 0.00E+00  | Lipase member H; similar with LIPH_RAT                        |
| Px012696.1 | 2.6414 | 1.16E-90  | 2.93E-89  | Lipase 3; similar with LIP3_DROME                             |
| Px013824.1 | 2.5061 | 4.55E-14  | 2.94E-13  | Sensory neuron membrane protein 1; similar with SNMP1_PEDHC   |
| Px011683.2 | 2.4698 | 9.12E-191 | 3.91E-189 | Venom carboxylesterase-6; similar with EST6_APIIME            |
| Px001456.1 | 2.3739 | 1.19E-96  | 3.15E-95  | Gastric triacylglycerol lipase; similar with LIPG_RAT         |
| Px000104.1 | 2.3695 | 6.34E-13  | 3.87E-12  | Pancreatic lipase-related protein 2; similar with LIPR2_CAVPO |
| Px011788.2 | 2.1319 | 2.40E-67  | 5.04E-66  | Pancreatic lipase-related protein 2; similar with LIPR2_BOVIN |
| Px005805.1 | 2.1005 | 1.53E-07  | 6.25E-07  | Lipase 1; similar with LIP1_DROME                             |
| Px001510.4 | 1.8746 | 7.52E-40  | 1.05E-38  | Scavenger receptor class B member 1; similar with SCRB1_PIG   |
| Px006345.1 | 1.7781 | 1.52E-87  | 3.77E-86  | Pancreatic lipase-related protein 2; similar with LIPR2_MYOCO |
| Px004131.5 | 1.7548 | 8.64E-41  | 1.23E-39  | Calcium-independent phospholipase A2-gamma                    |
| Px004753.1 | 1.7057 | 1.64E-52  | 2.88E-51  | Pancreatic lipase-related protein 2; similar with LIPR2_MYOCO |
| Px003649.1 | 1.6988 | 0.00E+00  | 0.00E+00  | Esterase FE4; similar with ESTF_MYZPE                         |
| Px017838.1 | 1.6880 | 1.08E-28  | 1.20E-27  | ATP-binding cassette sub-family A member 12                   |
| Px005197.1 | 1.6696 | 5.48E-15  | 3.76E-14  | Long-chain fatty acid transport protein 4                     |
| Px011049.1 | 1.5512 | 8.68E-06  | 2.92E-05  | Acetylcholinesterase; similar with ACES_FELCA                 |
| Px001337.1 | 1.4834 | 0.00E+00  | 0.00E+00  | Putative uncharacterized protein; similar with A9NYL2_PICSI   |
| Px009940.2 | 1.4584 | 2.00E-08  | 8.84E-08  | Acetylcholinesterase; similar with ACES_CULPI                 |
| Px003712.1 | 1.4525 | 1.46E-09  | 7.13E-09  | Acetylcholinesterase; similar with ACES_CULPI                 |
| Px006262.1 | 1.4414 | 4.21E-28  | 4.61E-27  | Lipase 3; similar with LIP3_DROME                             |
| Px011325.1 | 1.3737 | 4.72E-28  | 5.16E-27  | Lysosome membrane protein 2; similar with SCRB2_MOUSE         |
| Px004752.1 | 1.3734 | 0.00E+00  | 0.00E+00  | Pancreatic lipase-related protein 2; similar with LIPR2_BOVIN |
| Px000515.1 | 1.3647 | 1.85E-27  | 1.99E-26  | Esterase FE4; similar with ESTF_MYZPE                         |
| Px002296.1 | 1.3429 | 6.45E-75  | 1.45E-73  | Pancreatic triacylglycerol lipase; similar with LIPP_HUMAN    |
| Px011443.1 | 1.2632 | 1.85E-11  | 1.03E-10  | Esterase FE4; similar with ESTF_MYZPE                         |
| Px005193.2 | 1.2375 | 6.57E-27  | 6.96E-26  | Pancreatic lipase-related protein 2; similar with LIPR2_MYOCO |
| Px008150.1 | 1.2054 | 4.02E-05  | 1.24E-04  | Scavenger receptor class B member 1; similar with SCRB1_PIG   |
| Px006313.1 | 1.2054 | 4.59E-07  | 1.79E-06  | Unknown functio                                               |
| Px012939.1 | 1.2048 | 1.82E-08  | 8.07E-08  | Protein turtle; similar with TUTL_DROME                       |
| Px005199.1 | 1.1968 | 3.62E-34  | 4.59E-33  | Long-chain fatty acid transport protein 4                     |
| Px011529.1 | 1.1775 | 1.57E-37  | 2.10E-36  | Apolipoporphins; similar with APLP_LOCFMI                     |
| Px004510.1 | 1.1686 | 1.57E-18  | 1.25E-17  | ABC transporter G family member 20; similar with ABCGK_DICDI  |
| Px004750.1 | 1.1637 | 0.00E+00  | 0.00E+00  | Pancreatic lipase-related protein 2; similar with LIPR2_RAT   |
| Px017144.1 | 1.1569 | 1.61E-04  | 4.58E-04  | 1-acyl-sn-glycerol-3-phosphate acyltransferase beta           |
| Px017996.1 | 1.1300 | 3.04E-23  | 2.87E-22  | Acetylcholinesterase; similar with ACES_HUMAN                 |
| Px002295.1 | 1.0591 | 2.25E-92  | 5.79E-91  | Pancreatic lipase-related protein 2; similar with LIPR2_BOVIN |
| Px013659.1 | 1.0189 | 6.26E-11  | 3.38E-10  | ATP-binding cassette sub-family A member 1                    |



|            |         |           |           |                                                               |
|------------|---------|-----------|-----------|---------------------------------------------------------------|
| Px004200.1 | 1.0183  | 4.72E-21  | 4.15E-20  | Putative phosphatidate phosphatase; similar with WUN_DROME    |
| Px000102.1 | -1.8916 | 1.29E-32  | 1.57E-31  | Pancreatic lipase-related protein 3; similar with LIPR3_HUMAN |
| Px009691.1 | -1.7400 | 2.15E-07  | 8.65E-07  | Lipase 1; similar with LIP1_DROME                             |
| Px008080.1 | -1.3571 | 7.20E-06  | 2.45E-05  | Lysosome membrane protein 2; similar with SCRB2_HUMAN         |
| Px004201.1 | -1.2925 | 3.87E-106 | 1.11E-104 | Putative phosphatidate phosphatase; similar with WUN_DROME    |
| Px012677.1 | -1.2183 | 2.47E-04  | 6.79E-04  | Lipase member H-A; similar with LIPHA_XENLA                   |
| Px001589.1 | -1.2061 | 1.74E-07  | 7.04E-07  | Scavenger receptor class B member 1; similar with SCRB1_CRIGR |

---

**Table E.** A list of DEGs enriched in the *P. xylostella* pathways at 36 hpt<sub>1</sub> versus 24 hpt<sub>1</sub>.

| Gene ID                                                | log <sub>2</sub> R | P-value   | FDR       | Annotation                                                           |
|--------------------------------------------------------|--------------------|-----------|-----------|----------------------------------------------------------------------|
| <b>Involved in alpha-Linolenic acid metabolism</b>     |                    |           |           |                                                                      |
| Px009691.1                                             | 3.4211             | 1.35E-22  | 1.59E-21  | Lipase 1; similar with LIP1_DROME                                    |
| Px012560.1                                             | 3.3198             | 5.27E-05  | 1.91E-04  | Lipase member H-B; similar with LIPHB_XENLA                          |
| Px002439.1                                             | 2.8901             | 8.15E-09  | 4.70E-08  | 85 kDa calcium-independent phospholipase A2                          |
| Px008299.1                                             | 1.5466             | 1.31E-43  | 2.60E-42  | Pancreatic triacylglycerol lipase; similar with LIPP_RABIT           |
| Px012696.1                                             | 1.4788             | 9.94E-81  | 3.24E-79  | Lipase 3; similar with LIP3_DROME                                    |
| Px004131.5                                             | 1.4770             | 1.90E-34  | 3.14E-33  | Calcium-independent phospholipase A2-gamma                           |
| Px011476.1                                             | 1.4379             | 1.22E-13  | 9.89E-13  | Lipase 3; similar with LIP3_DROME                                    |
| Px006345.1                                             | 1.3604             | 1.89E-137 | 9.14E-136 | Pancreatic lipase-related protein 2; similar with LIPR2_MYOCO        |
| Px001913.1                                             | 1.3119             | 1.10E-58  | 2.72E-57  | Gastric triacylglycerol lipase; similar with LIPG_RAT                |
| Px003273.1                                             | 1.2793             | 6.98E-08  | 3.65E-07  | Pancreatic lipase-related protein 2; similar with LIPR2_CAVPO        |
| Px005804.1                                             | 1.2619             | 8.87E-38  | 1.58E-36  | Lipase 1; similar with LIP1_DROME                                    |
| Px007883.1                                             | 1.1586             | 1.71E-20  | 1.90E-19  | Probable medium-chain specific acyl-CoA dehydrogenase, mitochondrial |
| Px011475.1                                             | 1.1550             | 1.37E-130 | 6.32E-129 | Lipase 3; similar with LIP3_DROME                                    |
| Px012695.1                                             | 1.1284             | 9.95E-39  | 1.81E-37  | Lipase 1; similar with LIP1_DROME                                    |
| Px004753.1                                             | 1.1219             | 1.62E-67  | 4.55E-66  | Pancreatic lipase-related protein 2; similar with LIPR2_MYOCO        |
| Px004662.1                                             | 1.0372             | 2.78E-05  | 1.05E-04  | Lipase 1; similar with LIP1_DROME                                    |
| Px017173.1                                             | -1.0855            | 9.56E-10  | 5.99E-09  | Lipase 1; similar with LIP1_DROME                                    |
| Px016338.1                                             | -1.0692            | 1.84E-51  | 4.13E-50  | Lipase 1; similar with LIP1_DROME                                    |
| <b>Involved in jak-STAT signaling pathway</b>          |                    |           |           |                                                                      |
| Px008866.1                                             | 4.0169             | 3.36E-23  | 4.06E-22  | Chorion peroxidase; similar with PERC_DROME                          |
| Px013761.3                                             | 3.4453             | 1.68E-05  | 6.54E-05  | Peroxidase; similar with PERO_DROME                                  |
| Px016174.1                                             | 2.5233             | 6.89E-09  | 4.01E-08  | Suppressor of cytokine signaling 5                                   |
| Px017055.1                                             | 2.3629             | 1.93E-05  | 7.43E-05  | Signal transducer and activator of transcription short form          |
| Px006617.2                                             | 2.2296             | 3.60E-19  | 3.80E-18  | Chorion peroxidase; similar with PERC_DROME                          |
| Px001416.2                                             | 1.9193             | 4.72E-06  | 1.98E-05  | Son of sevenless homolog 1; similar with SOS1_MOUSE                  |
| Px000279.1                                             | 1.7250             | 2.21E-21  | 2.54E-20  | Suppressor of cytokine signaling 2; similar with SOCS2_RAT           |
| Px007394.2                                             | 1.6531             | 2.52E-69  | 7.27E-68  | Peroxidasin homolog; similar with PXDN_MOUSE                         |
| Px014219.1                                             | 1.3472             | 8.72E-13  | 6.72E-12  | Signal transducer and transcription activator                        |
| Px009359.1                                             | 1.3141             | 8.23E-12  | 5.97E-11  | Cytokine receptor; similar with DOME_DROME                           |
| Px009586.1                                             | 1.2474             | 1.51E-06  | 6.72E-06  | Phosphatidylinositol 3-kinase regulatory subunit gamma               |
| Px002890.1                                             | 1.1629             | 7.37E-35  | 1.23E-33  | Sorting nexin-33; similar with SNX33_MOUSE                           |
| Px012070.1                                             | 1.1354             | 5.24E-12  | 3.84E-11  | TBC1 domain family member 23; similar with TBC23_PONAB               |
| Px017291.1                                             | 1.1127             | 9.26E-05  | 3.23E-04  | TOM1-like protein 2; similar with TM1L2_HUMAN                        |
| Px001125.2                                             | 1.0085             | 2.57E-07  | 1.26E-06  | Unknown functio                                                      |
| Px006512.1                                             | -1.2636            | 2.82E-11  | 1.98E-10  | RNA-binding protein 41; similar with RBM41_HUMAN                     |
| <b>Involved in complement and coagulation cascades</b> |                    |           |           |                                                                      |
| Px003000.1                                             | 12.5364            | 5.20E-38  | 9.24E-37  | Transmembrane protease serine 6; similar with TMPS6_MOUSE            |
| Px004167.1                                             | 5.4149             | 1.64E-12  | 1.25E-11  | Plasma kallikrein; similar with KLKB1_MOUSE                          |
| Px015905.1                                             | 4.3586             | 3.39E-50  | 7.48E-49  | Transmembrane protease serine 6; similar with TMPS6_MOUSE            |
| Px006453.1                                             | 3.7183             | 9.28E-07  | 4.24E-06  | Transmembrane protease serine 6; similar with TMPS6_MOUSE            |
| Px007757.1                                             | 2.6932             | 9.34E-26  | 1.23E-24  | Putative trypsin Inhibitor like cysteine rich domain protein         |
| Px004168.1                                             | 2.3782             | 3.79E-09  | 2.25E-08  | Plasma kallikrein; similar with KLKB1_HUMAN                          |
| Px005947.1                                             | 1.7534             | 6.64E-08  | 3.49E-07  | Serine proteinase stubble; similar with STUB_DROME                   |
| Px013945.1                                             | 1.6753             | 7.42E-09  | 4.31E-08  | Pregnancy zone protein; similar with PZP_HUMAN                       |
| Px016053.1                                             | 1.4991             | 6.82E-18  | 6.86E-17  | Trypsin; similar with TRYP_PHACE                                     |
| Px006790.1                                             | 1.4338             | 6.89E-25  | 8.80E-24  | Hemocytin; similar with HMCT_BOMMO                                   |
| Px013431.3                                             | 1.2846             | 9.04E-21  | 1.01E-19  | Pregnancy zone protein; similar with PZP_HUMAN                       |
| Px006789.3                                             | 1.2682             | 3.55E-247 | 2.82E-245 | Hemocytin; similar with HMCT_BOMMO                                   |

Px007556.1 -1.0904 6.20E-16 5.70E-15 Plasma kallikrein; similar with KLKB1\_HUMAN

### **Involved in fat digestion and absorption**

Px009691.1 3.4211 1.35E-22 1.59E-21 Lipase 1; similar with LIP1\_DROME  
Px012560.1 3.3198 5.27E-05 1.91E-04 Lipase member H-B; similar with LIPHB\_XENLA  
Px002439.1 2.8901 8.15E-09 4.70E-08 85 kDa calcium-independent phospholipase A2  
Px004112.1 2.0072 1.43E-07 7.21E-07 Phosphatidate phosphatase PPAPDC1B  
Px004046.1 1.8369 2.68E-12 2.01E-11 Esterase FE4; similar with ESTF\_MYZPE  
Px008089.1 1.6672 0.00E+00 0.00E+00 Pancreatic lipase-related protein 2; similar with LIPR2\_CAVPO  
Px008299.1 1.5466 1.31E-43 2.60E-42 Pancreatic triacylglycerol lipase; similar with LIPP\_RABIT  
Px012696.1 1.4788 9.94E-81 3.24E-79 Lipase 3; similar with LIP3\_DROME  
Px004131.5 1.4770 1.90E-34 3.14E-33 Calcium-independent phospholipase A2-gamma  
Px005198.1 1.4333 2.45E-31 3.80E-30 Long-chain fatty acid transport protein 4  
Px003649.1 1.3690 0.00E+00 0.00E+00 Esterase FE4; similar with ESTF\_MYZPE  
Px006345.1 1.3604 1.89E-137 9.14E-136 Pancreatic lipase-related protein 2; similar with LIPR2\_MYOCO  
Px000644.1 1.3260 7.39E-08 3.85E-07 Pancreatic triacylglycerol lipase; similar with LIPP\_MOUSE  
Px003273.1 1.2793 6.98E-08 3.65E-07 Pancreatic lipase-related protein 2; similar with LIPR2\_CAVPO  
Px004200.1 1.2352 1.36E-36 2.37E-35 Putative phosphatidate phosphatase  
Px017838.1 1.1994 1.28E-19 1.37E-18 ATP-binding cassette sub-family A member 12  
Px001456.1 1.1395 3.96E-60 1.01E-58 Gastric triacylglycerol lipase; similar with LIPG\_RAT  
Px011443.1 1.1348 1.60E-12 1.22E-11 Esterase FE4; similar with ESTF\_MYZPE  
Px004753.1 1.1219 1.62E-67 4.55E-66 Pancreatic lipase-related protein 2; similar with LIPR2\_MYOCO  
Px008150.1 1.0828 3.26E-08 1.77E-07 Scavenger receptor class B member 1; similar with SCRB1\_PIG  
Px011529.1 1.0687 3.97E-67 1.11E-65 Apolipoporphins; similar with APLP\_LOCFI  
Px011335.1 1.0468 1.92E-06 8.43E-06 Scavenger receptor class B member 1  
Px008997.1 1.0372 2.78E-05 1.05E-04 Juvenile hormone esterase; similar with ESTJ\_HELVI  
Px017144.1 1.0267 4.23E-05 1.56E-04 1-acyl-sn-glycerol-3-phosphate acyltransferase beta  
Px004160.1 -1.4027 2.83E-06 1.22E-05 Pancreatic lipase-related protein 2; similar with LIPR2\_RAT

### **Involved in amino sugar and nucleotide sugar metabolism**

Px009803.1 10.8775 1.02E-07 5.23E-07 Probable chitinase 2; similar with CHIT2\_DROME  
Px008062.1 5.8146 2.04E-156 1.10E-154 Endochitinase; similar with CHIT\_MANSE  
Px001433.1 3.9896 2.70E-08 1.48E-07 Probable chitinase 2; similar with CHIT2\_DROME  
Px011561.1 2.1976 1.57E-75 4.80E-74 Probable chitinase 3; similar with CHIT3\_DROME  
Px016709.1 2.0403 4.32E-31 6.66E-30 Glucosamine-6-phosphate isomerase  
Px005496.1 1.9438 1.51E-18 1.56E-17 GDP-mannose 4,6 dehydratase; similar with GMDS\_DROME  
Px009279.1 1.8168 3.74E-64 9.98E-63 Chitotriosidase-1; similar with CHIT1\_HUMAN  
Px012913.1 1.7704 7.66E-144 3.85E-142 Chitin synthase 6; similar with CHS6\_USTMA  
Px017503.2 1.6594 3.98E-08 2.14E-07 Probable chitinase 2; similar with CHIT2\_DROME  
Px012404.1 1.5652 3.69E-36 6.38E-35 Probable chitinase 3; similar with CHIT3\_DROME  
Px006848.1 1.4775 2.65E-16 2.48E-15 UDP-glucose 6-dehydrogenase; similar with UGDH\_DROME  
Px016080.1 1.3964 8.21E-05 2.89E-04 Glucosamine-6-phosphate isomerase  
Px005479.2 1.3390 4.90E-11 3.39E-10 Chitooligosaccharidolytic beta-N-acetylglucosaminidase  
Px002919.1 1.3073 1.52E-15 1.37E-14 Putative N-acetylglucosamine-6-phosphate deacetylase  
Px003540.1 1.2878 3.64E-22 4.26E-21 Hexokinase type 2; similar with HXK2\_DROME  
Px016079.1 1.2055 7.03E-06 2.89E-05 Glucosamine-6-phosphate isomerase; similar with GNPI\_DROPS  
Px014908.1 1.2014 5.74E-05 2.07E-04 Mannose-1-phosphate guanyltransferase beta  
Px000053.3 1.1695 1.85E-19 1.97E-18 N-acylneuraminate-9-phosphatase; similar with NANP\_RAT  
Px003769.1 1.1263 2.76E-31 4.27E-30 Hexokinase type 2; similar with HXK2\_DROME  
Px013778.1 1.0955 3.00E-132 1.40E-130 Chitin synthase 3; similar with CHS3\_USTMA  
Px014904.1 1.0156 1.44E-08 8.12E-08 Mannose-1-phosphate guanyltransferase beta  
Px008741.1 -1.2612 1.25E-37 2.22E-36 Chondroitin proteoglycan 2; similar with CPG2\_CAEBR

### **Involved in glycerophospholipid metabolism**

|            |         |           |           |                                                                 |
|------------|---------|-----------|-----------|-----------------------------------------------------------------|
| Px015388.1 | 3.7672  | 5.33E-10  | 3.43E-09  | Nose resistant to fluoxetine protein 6; similar with NRF6_CAEEL |
| Px009691.1 | 3.4211  | 1.35E-22  | 1.59E-21  | Lipase 1; similar with LIP1_DROME                               |
| Px012560.1 | 3.3198  | 5.27E-05  | 1.91E-04  | Lipase member H-B; similar with LIPHB_XENLA                     |
| Px005418.1 | 3.0303  | 4.90E-07  | 2.32E-06  | Nose resistant to fluoxetine protein 6; similar with NRF6_CAEEL |
| Px002439.1 | 2.8901  | 8.15E-09  | 4.70E-08  | 85 kDa calcium-independent phospholipase A2                     |
| Px013101.1 | 2.6932  | 1.90E-09  | 1.16E-08  | Nose resistant to fluoxetine protein 6; similar with NRF6_CAEEL |
| Px004112.1 | 2.0072  | 1.43E-07  | 7.21E-07  | Phosphatidate phosphatase PPAPDC1B                              |
| Px000040.1 | 1.9896  | 9.64E-05  | 3.35E-04  | N-alpha-acetyltransferase 40, NatD catalytic subunit            |
| Px008299.1 | 1.5466  | 1.31E-43  | 2.60E-42  | Pancreatic triacylglycerol lipase; similar with LIPP_RABIT      |
| Px014079.1 | 1.5138  | 1.12E-11  | 8.07E-11  | Nose resistant to fluoxetine protein 6; similar with NRF6_CAEEL |
| Px012696.1 | 1.4788  | 9.94E-81  | 3.24E-79  | Lipase 3; similar with LIP3_DROME                               |
| Px004131.5 | 1.4770  | 1.90E-34  | 3.14E-33  | Calcium-independent phospholipase A2-gamma                      |
| Px011476.1 | 1.4379  | 1.22E-13  | 9.89E-13  | Lipase 3; similar with LIP3_DROME                               |
| Px006345.1 | 1.3604  | 1.89E-137 | 9.14E-136 | Pancreatic lipase-related protein 2; similar with LIPR2_MYOCO   |
| Px001913.1 | 1.3119  | 1.10E-58  | 2.72E-57  | Gastric triacylglycerol lipase; similar with LIPG_RAT           |
| Px003273.1 | 1.2793  | 6.98E-08  | 3.65E-07  | Pancreatic lipase-related protein 2; similar with LIPR2_CAVPO   |
| Px005804.1 | 1.2619  | 8.87E-38  | 1.58E-36  | Lipase 1; similar with LIP1_DROME                               |
| Px004200.1 | 1.2352  | 1.36E-36  | 2.37E-35  | Putative phosphatidate phosphatase; similar with WUN_DROME      |
| Px008142.1 | 1.1823  | 5.57E-07  | 2.61E-06  | Meteorin-like protein; similar with METRL_RAT                   |
| Px011475.1 | 1.1550  | 1.37E-130 | 6.32E-129 | Lipase 3; similar with LIP3_DROME                               |
| Px005172.2 | 1.1389  | 3.80E-07  | 1.82E-06  | Group XV phospholipase A2; similar with PAG15_HUMAN             |
| Px012695.1 | 1.1284  | 9.95E-39  | 1.81E-37  | Lipase 1; similar with LIP1_DROME                               |
| Px004753.1 | 1.1219  | 1.62E-67  | 4.55E-66  | Pancreatic lipase-related protein 2; similar with LIPR2_MYOCO   |
| Px003579.1 | 1.1187  | 2.25E-27  | 3.11E-26  | Glycerol-3-phosphate acyltransferase 1, mitochondrial           |
| Px014043.4 | 1.1083  | 3.62E-06  | 1.54E-05  | Nose resistant to fluoxetine protein 6; similar with NRF6_CAEEL |
| Px003528.3 | 1.0998  | 7.23E-05  | 2.58E-04  | Nose resistant to fluoxetine protein 6; similar with NRF6_CAEEL |
| Px006720.1 | 1.0776  | 4.40E-05  | 1.62E-04  | Glycerol-3-phosphate acyltransferase 4                          |
| Px013003.3 | 1.0713  | 2.35E-06  | 1.02E-05  | Neuropathy target esterase sws; similar with SWS_DROSE          |
| Px004662.1 | 1.0372  | 2.78E-05  | 1.05E-04  | Lipase 1; similar with LIP1_DROME                               |
| Px017144.1 | 1.0267  | 4.23E-05  | 1.56E-04  | 1-acyl-sn-glycerol-3-phosphate acyltransferase beta             |
| Px017173.1 | -1.0855 | 9.56E-10  | 5.99E-09  | Lipase 1; similar with LIP1_DROME                               |
| Px016338.1 | -1.0692 | 1.84E-51  | 4.13E-50  | Lipase 1; similar with LIP1_DROME                               |

### Involved in tyrosine metabolism

|            |         |          |          |                                                                 |
|------------|---------|----------|----------|-----------------------------------------------------------------|
| Px008866.1 | 4.0169  | 3.36E-23 | 4.06E-22 | Chorion peroxidase; similar with PERC_DROME                     |
| Px015388.1 | 3.7672  | 5.33E-10 | 3.43E-09 | Nose resistant to fluoxetine protein 6; similar with NRF6_CAEEL |
| Px013761.3 | 3.4453  | 1.68E-05 | 6.54E-05 | #N/A                                                            |
| Px005418.1 | 3.0303  | 4.90E-07 | 2.32E-06 | Nose resistant to fluoxetine protein 6; similar with NRF6_CAEEL |
| Px013101.1 | 2.6932  | 1.90E-09 | 1.16E-08 | Nose resistant to fluoxetine protein 6; similar with NRF6_CAEEL |
| Px006617.2 | 2.2296  | 3.60E-19 | 3.80E-18 | Chorion peroxidase; similar with PERC_DROME                     |
| Px000040.1 | 1.9896  | 9.64E-05 | 3.35E-04 | N-alpha-acetyltransferase 40, NatD catalytic subunit            |
| Px011987.1 | 1.7765  | 2.20E-11 | 1.56E-10 | Amine oxidase [flavin-containing] B; similar with AOFB_MOUSE    |
| Px007394.2 | 1.6531  | 2.52E-69 | 7.27E-68 | Peroxidasin homolog; similar with PXDN_MOUSE                    |
| Px014079.1 | 1.5138  | 1.12E-11 | 8.07E-11 | Nose resistant to fluoxetine protein 6; similar with NRF6_CAEEL |
| Px007028.1 | 1.4107  | 0.00E+00 | 0.00E+00 | Arylphorin subunit alpha; similar with ARYA_MANSE               |
| Px000359.2 | 1.3395  | 1.41E-06 | 6.28E-06 | Alpha-methyl dopa hypersensitive protein                        |
| Px007030.1 | 1.1691  | 0.00E+00 | 0.00E+00 | Basic juvenile hormone-suppressible protein 2                   |
| Px006820.1 | 1.1363  | 0.00E+00 | 0.00E+00 | Basic juvenile hormone-suppressible protein 1                   |
| Px012208.1 | 1.1156  | 1.08E-07 | 5.54E-07 | Probable flavin-containing monoamine oxidase A                  |
| Px014043.4 | 1.1083  | 3.62E-06 | 1.54E-05 | Nose resistant to fluoxetine protein 6; similar with NRF6_CAEEL |
| Px003528.3 | 1.0998  | 7.23E-05 | 2.58E-04 | Nose resistant to fluoxetine protein 6; similar with NRF6_CAEEL |
| Px000224.1 | -1.9102 | 1.61E-07 | 8.07E-07 | 4-hydroxyphenylpyruvate dioxygenase                             |

### Involved in glycerolipid metabolism

|            |         |           |           |                                                               |
|------------|---------|-----------|-----------|---------------------------------------------------------------|
| Px009691.1 | 3.4211  | 1.35E-22  | 1.59E-21  | Lipase 1; similar with LIP1_DROME                             |
| Px012560.1 | 3.3198  | 5.27E-05  | 1.91E-04  | Lipase member H-B; similar with LIPHB_XENLA                   |
| Px014975.1 | 3.0828  | 8.77E-06  | 3.57E-05  | Alcohol dehydrogenase [NADP+] A                               |
| Px004112.1 | 2.0072  | 1.43E-07  | 7.21E-07  | Phosphatidate phosphatase PPAPDC1B                            |
| Px004046.1 | 1.8369  | 2.68E-12  | 2.01E-11  | Esterase FE4; similar with ESTF_MYZPE                         |
| Px008089.1 | 1.6672  | 0.00E+00  | 0.00E+00  | Pancreatic lipase-related protein 2; similar with LIPR2_CAVPO |
| Px008299.1 | 1.5466  | 1.31E-43  | 2.60E-42  | Pancreatic triacylglycerol lipase; similar with LIPP_RABIT    |
| Px012696.1 | 1.4788  | 9.94E-81  | 3.24E-79  | Lipase 3; similar with LIP3_DROME                             |
| Px011476.1 | 1.4379  | 1.22E-13  | 9.89E-13  | Lipase 3; similar with LIP3_DROME                             |
| Px003649.1 | 1.3690  | 0.00E+00  | 0.00E+00  | Esterase FE4; similar with ESTF_MYZPE                         |
| Px006345.1 | 1.3604  | 1.89E-137 | 9.14E-136 | Pancreatic lipase-related protein 2; similar with LIPR2_MYOCO |
| Px005876.1 | 1.3414  | 6.47E-31  | 9.92E-30  | Patatin-like phospholipase domain-containing protein 2        |
| Px000644.1 | 1.3260  | 7.39E-08  | 3.85E-07  | Pancreatic triacylglycerol lipase; similar with LIPP_MOUSE    |
| Px001913.1 | 1.3119  | 1.10E-58  | 2.72E-57  | Gastric triacylglycerol lipase; similar with LIPG_RAT         |
| Px003273.1 | 1.2793  | 6.98E-08  | 3.65E-07  | Pancreatic lipase-related protein 2; similar with LIPR2_CAVPO |
| Px005804.1 | 1.2619  | 8.87E-38  | 1.58E-36  | Lipase 1; similar with LIP1_DROME                             |
| Px004200.1 | 1.2352  | 1.36E-36  | 2.37E-35  | Putative phosphatidate phosphatase                            |
| Px008142.1 | 1.1823  | 5.57E-07  | 2.61E-06  | Meteorin-like protein; similar with METRL_RAT                 |
| Px000132.1 | 1.1786  | 8.56E-47  | 1.79E-45  | FGGY carbohydrate kinase domain-containing protein            |
| Px011475.1 | 1.1550  | 1.37E-130 | 6.32E-129 | Lipase 3; similar with LIP3_DROME                             |
| Px001456.1 | 1.1395  | 3.96E-60  | 1.01E-58  | Gastric triacylglycerol lipase; similar with LIPG_RAT         |
| Px011443.1 | 1.1348  | 1.60E-12  | 1.22E-11  | Esterase FE4; similar with ESTF_MYZPE                         |
| Px012695.1 | 1.1284  | 9.95E-39  | 1.81E-37  | Lipase 1; similar with LIP1_DROME                             |
| Px004753.1 | 1.1219  | 1.62E-67  | 4.55E-66  | Pancreatic lipase-related protein 2; similar with LIPR2_MYOCO |
| Px003579.1 | 1.1187  | 2.25E-27  | 3.11E-26  | Glycerol-3-phosphate acyltransferase 1, mitochondrial         |
| Px006720.1 | 1.0776  | 4.40E-05  | 1.62E-04  | Glycerol-3-phosphate acyltransferase 4                        |
| Px008997.1 | 1.0372  | 2.78E-05  | 1.05E-04  | Juvenile hormone esterase; similar with ESTJ_HELVI            |
| Px004662.1 | 1.0372  | 2.78E-05  | 1.05E-04  | Lipase 1; similar with LIP1_DROME                             |
| Px017144.1 | 1.0267  | 4.23E-05  | 1.56E-04  | 1-acyl-sn-glycerol-3-phosphate acyltransferase beta           |
| Px004160.1 | -1.4027 | 2.83E-06  | 1.22E-05  | Pancreatic lipase-related protein 2; similar with LIPR2_RAT   |
| Px004110.1 | -1.3990 | 3.91E-12  | 2.89E-11  | Aldose reductase; similar with ALDR_RABIT                     |
| Px012956.1 | -1.2100 | 1.62E-10  | 1.08E-09  | Aldose reductase; similar with ALDR_RABIT                     |
| Px017173.1 | -1.0855 | 9.56E-10  | 5.99E-09  | Lipase 1; similar with LIP1_DROME                             |
| Px016338.1 | -1.0692 | 1.84E-51  | 4.13E-50  | Lipase 1; similar with LIP1_DROME                             |

---

**Table F.** A list of DEGs enriched in the *P. xylostella* pathways at 48 hpt<sub>I</sub> versus 36 hpt<sub>I</sub>.

| Gene ID                                             | log <sub>2</sub> R | P-value   | FDR       | Annotation                                                          |
|-----------------------------------------------------|--------------------|-----------|-----------|---------------------------------------------------------------------|
| <b>Involved in protein digestion and absorption</b> |                    |           |           |                                                                     |
| Px006007.1                                          | 1.8646             | 6.62E-06  | 3.41E-05  | Unknown function                                                    |
| Px013814.3                                          | 1.3796             | 2.93E-07  | 1.75E-06  | Sodium/potassium-transporting ATPase subunit beta-2                 |
| Px008393.1                                          | 1.2783             | 4.96E-08  | 3.17E-07  | Nck-associated protein 5; similar with NCKP5_HUMAN                  |
| Px014256.1                                          | -4.8476            | 3.36E-08  | 2.18E-07  | Unknown function                                                    |
| Px005554.1                                          | -4.5132            | 1.70E-06  | 9.36E-06  | Chymotrypsin-1; similar with CTR1_ANOGA                             |
| Px013747.1                                          | -3.3917            | 2.28E-15  | 2.37E-14  | Proton-coupled amino acid transporter 1                             |
| Px005373.1                                          | -3.1779            | 1.15E-43  | 2.34E-42  | Carboxypeptidase B; similar with CBPB_ASTFL                         |
| Px010313.2                                          | -3.0785            | 4.07E-85  | 1.31E-83  | Serine proteinase stubble; similar with STUB_DROME                  |
| Px015280.1                                          | -3.0485            | 6.83E-10  | 5.07E-09  | Trypsin CFT-1; similar with TRYP_CHOFU                              |
| Px011754.1                                          | -2.9282            | 1.53E-16  | 1.66E-15  | Proton-coupled amino acid transporter 1                             |
| Px011887.1                                          | -2.8795            | 0.00E+00  | 0.00E+00  | Trypsin, alkaline C; similar with TRYC_MANSE                        |
| Px001649.1                                          | -2.8762            | 9.90E-53  | 2.29E-51  | MAM domain-containing glycosylphosphatidylinositol anchor protein 1 |
| Px007670.1                                          | -2.8376            | 8.00E-36  | 1.42E-34  | Proclotting enzyme; similar with PCE_TACTR                          |
| Px012813.1                                          | -2.5746            | 1.13E-04  | 4.76E-04  | Serine proteinase stubble; similar with STUB_DROME                  |
| Px004167.1                                          | -2.5442            | 5.53E-08  | 3.53E-07  | Plasma kallikrein; similar with KLKB1_MOUSE                         |
| Px015279.1                                          | -2.4814            | 8.78E-14  | 8.44E-13  | Trypsin, alkaline A; similar with TRYA_MANSE                        |
| Px009395.1                                          | -2.3608            | 7.33E-17  | 8.06E-16  | Proclotting enzyme; similar with PCE_TACTR                          |
| Px016053.1                                          | -2.2883            | 3.96E-32  | 6.55E-31  | Trypsin; similar with TRYP_PHACE                                    |
| Px007600.1                                          | -2.1704            | 8.57E-179 | 4.82E-177 | Chymotrypsin-1; similar with CTR1_ANOGA                             |
| Px015278.1                                          | -2.1543            | 1.50E-17  | 1.69E-16  | Trypsin, alkaline A; similar with TRYA_MANSE                        |
| Px015276.1                                          | -2.1364            | 2.14E-33  | 3.68E-32  | Trypsin CFT-1; similar with TRYP_CHOFU                              |
| Px009568.1                                          | -2.0485            | 8.77E-07  | 4.95E-06  | Trypsin, alkaline C; similar with TRYC_MANSE                        |
| Px012570.1                                          | -1.9507            | 0.00E+00  | 0.00E+00  | Trypsin CFT-1; similar with TRYP_CHOFU                              |
| Px002586.1                                          | -1.9496            | 8.66E-27  | 1.26E-25  | Trypsin CFT-1; similar with TRYP_CHOFU                              |
| Px008406.1                                          | -1.9282            | 2.58E-08  | 1.70E-07  | Serine proteinase stubble; similar with STUB_DROME                  |
| Px002587.1                                          | -1.9104            | 0.00E+00  | 0.00E+00  | Trypsin CFT-1; similar with TRYP_CHOFU                              |
| Px005947.1                                          | -1.8827            | 5.51E-09  | 3.84E-08  | Serine proteinase stubble; similar with STUB_DROME                  |
| Px007902.1                                          | -1.8728            | 1.80E-17  | 2.03E-16  | Collagenase; similar with COGS_HYPLI                                |
| Px002440.1                                          | -1.8376            | 2.21E-18  | 2.58E-17  | Trypsin, alkaline B; similar with TRYB_MANSE                        |
| Px000996.2                                          | -1.8376            | 2.80E-40  | 5.43E-39  | Carboxypeptidase A2; similar with CBPA2_MOUSE                       |
| Px009637.1                                          | -1.8225            | 4.86E-12  | 4.22E-11  | Trypsin CFT-1; similar with TRYP_CHOFU                              |
| Px002993.1                                          | -1.8035            | 0.00E+00  | 0.00E+00  | Zinc metalloproteinase nas-4; similar with NAS4_CAEEL               |
| Px014882.1                                          | -1.7867            | 4.24E-58  | 1.03E-56  | Trypsin, alkaline C; similar with TRYC_MANSE                        |
| Px007903.1                                          | -1.7472            | 0.00E+00  | 0.00E+00  | Collagenase; similar with COGS_HYPLI                                |
| Px016054.1                                          | -1.7315            | 2.91E-18  | 3.38E-17  | Trypsin; similar with TRYP_PHACE                                    |
| Px002589.1                                          | -1.6905            | 8.93E-61  | 2.24E-59  | Trypsin, alkaline A; similar with TRYA_MANSE                        |
| Px009567.1                                          | -1.6684            | 1.19E-67  | 3.20E-66  | Trypsin, alkaline B; similar with TRYB_MANSE                        |
| Px000991.6                                          | -1.5978            | 1.12E-135 | 5.05E-134 | Carboxypeptidase O; similar with CBPO_BOVIN                         |
| Px007599.1                                          | -1.5923            | 0.00E+00  | 0.00E+00  | Chymotrypsin-1; similar with CTR1_ANOGA                             |
| Px011097.1                                          | -1.5746            | 9.30E-08  | 5.81E-07  | Serine proteinase stubble; similar with STUB_DROME                  |
| Px002442.1                                          | -1.5451            | 1.48E-08  | 9.93E-08  | Trypsin, alkaline C; similar with TRYC_MANSE                        |
| Px016055.1                                          | -1.5361            | 1.17E-17  | 1.33E-16  | Trypsin, alkaline C; similar with TRYC_MANSE                        |
| Px004168.1                                          | -1.4433            | 1.50E-05  | 7.32E-05  | Plasma kallikrein; similar with KLKB1_HUMAN                         |
| Px000994.1                                          | -1.3902            | 0.00E+00  | 0.00E+00  | Zinc carboxypeptidase A 1; similar with CBPA1_DROPS                 |
| Px007357.2                                          | -1.3810            | 0.00E+00  | 0.00E+00  | Serine proteinase stubble; similar with STUB_DROME                  |
| Px001804.1                                          | -1.3798            | 3.28E-12  | 2.87E-11  | Trypsin, alkaline B; similar with TRYB_MANSE                        |
| Px007621.1                                          | -1.3710            | 1.67E-07  | 1.02E-06  | Trypsin CFT-1; similar with TRYP_CHOFU                              |

|            |         |           |           |                                                            |
|------------|---------|-----------|-----------|------------------------------------------------------------|
| Px001990.2 | -1.3597 | 3.72E-51  | 8.50E-50  | Carboxypeptidase B; similar with CBPB_ASTFL                |
| Px008830.1 | -1.3365 | 7.12E-24  | 9.79E-23  | Trypsin, alkaline C; similar with TRYC_MANSE               |
| Px015277.1 | -1.3334 | 1.86E-42  | 3.75E-41  | Trypsin CFT-1; similar with TRYP_CHOFU                     |
| Px011428.1 | -1.3275 | 9.95E-07  | 5.59E-06  | Peptide transporter family 1; similar with PEPT1_DROME     |
| Px005240.1 | -1.2961 | 1.15E-27  | 1.71E-26  | Trypsin, alkaline A; similar with TRYA_MANSE               |
| Px001262.4 | -1.2953 | 1.18E-112 | 4.58E-111 | Collagen alpha-1(IV) chain; similar with CO4A1_DROME       |
| Px007901.1 | -1.2804 | 1.02E-94  | 3.49E-93  | Chymotrypsin BI; similar with CTB1_LITVA                   |
| Px015049.1 | -1.2783 | 3.98E-12  | 3.47E-11  | Venom dipeptidyl peptidase 4; similar with VDDP4_VESVU     |
| Px007675.1 | -1.2333 | 2.71E-176 | 1.50E-174 | Collagenase; similar with COGS_HYPLI                       |
| Px000992.1 | -1.1391 | 3.27E-295 | 2.88E-293 | Carboxypeptidase A1; similar with CBPA1_BOVIN              |
| Px013212.4 | -1.1366 | 5.72E-50  | 1.28E-48  | Inactive dipeptidyl peptidase 10; similar with DPP10_HUMAN |
| Px013919.1 | -1.1300 | 0.00E+00  | 0.00E+00  | Collagen alpha-4(VI) chain; similar with CO6A4_MOUSE       |
| Px005244.1 | -1.1143 | 2.04E-08  | 1.36E-07  | Trypsin CFT-1; similar with TRYP_CHOFU                     |
| Px002861.1 | -1.0790 | 0.00E+00  | 0.00E+00  | Trypsin, alkaline C; similar with TRYC_MANSE               |
| Px005239.1 | -1.0638 | 4.56E-87  | 1.48E-85  | Trypsin, alkaline A; similar with TRYA_MANSE               |
| Px014592.1 | -1.0450 | 1.60E-19  | 1.93E-18  | Trypsin CFT-1; similar with TRYP_CHOFU                     |
| Px013377.1 | -1.0384 | 2.02E-39  | 3.87E-38  | Trypsin; similar with TRYP_PHACE                           |
| Px013665.3 | -1.0337 | 7.86E-16  | 8.29E-15  | Collagenase; similar with COGS_HYPLI                       |
| Px002865.1 | -1.0134 | 0.00E+00  | 0.00E+00  | Trypsin 5G1; similar with TRY5_AEDAE                       |
| Px007900.1 | -1.0083 | 0.00E+00  | 0.00E+00  | Chymotrypsin BI; similar with CTB1_LITVA                   |
| Px016056.1 | -1.0042 | 0.00E+00  | 0.00E+00  | Trypsin, alkaline A; similar with TRYA_MANSE               |
| Px011889.1 | -1.0003 | 1.94E-06  | 1.06E-05  | Achelase-1; similar with ACH1_LONAC                        |
| Px005341.1 | -1.0002 | 6.21E-27  | 9.07E-26  | Collagenase; similar with COGS_HYPLI                       |

#### **Involved in drug metabolism - other enzymes**

|            |         |           |           |                                                                  |
|------------|---------|-----------|-----------|------------------------------------------------------------------|
| Px013955.1 | 1.9862  | 1.32E-07  | 8.12E-07  | Neuroigin-1; similar with NLGN1_HUMAN                            |
| Px009818.1 | 1.6813  | 1.48E-158 | 7.58E-157 | Putative aldehyde oxidase-like protein; similar with ALDOL_ORYSJ |
| Px015080.1 | 1.5382  | 2.00E-23  | 2.70E-22  | Ecdysteroid UDP-glucosyltransferase; similar with UDPE_NPVMB     |
| Px013145.1 | 1.0351  | 2.01E-231 | 1.45E-229 | Cytochrome P450 6B7; similar with CP6B7_HELAM                    |
| Px015079.1 | -3.1595 | 1.17E-07  | 7.28E-07  | Ecdysteroid UDP-glucosyltransferase; similar with UDPE_NPVSL     |
| Px004854.1 | -2.7504 | 3.14E-20  | 3.86E-19  | Ecdysteroid UDP-glucosyltransferase; similar with UDPE_NPVSL     |
| Px014217.1 | -1.9896 | 7.35E-20  | 8.93E-19  | Cytochrome P450 6k1; similar with CP6K1_BLAGE                    |
| Px000872.2 | -1.9896 | 8.91E-10  | 6.55E-09  | Ecdysteroid UDP-glucosyltransferase; similar with UDPE_NPVSL     |
| Px005900.1 | -1.9164 | 8.05E-36  | 1.43E-34  | Cytochrome P450 6B2; similar with CP6B2_HELAM                    |
| Px011049.1 | -1.8032 | 1.05E-22  | 1.38E-21  | Acetylcholinesterase; similar with ACES_FELCA                    |
| Px015078.1 | -1.6900 | 8.07E-07  | 4.58E-06  | Ecdysteroid UDP-glucosyltransferase; similar with UDPE_NPVSL     |
| Px014216.1 | -1.5409 | 2.47E-29  | 3.84E-28  | Cytochrome P450 6B6; similar with CP6B6_HELAM                    |
| Px013958.1 | -1.5363 | 1.75E-141 | 8.12E-140 | Cytochrome P450 6k1; similar with CP6K1_BLAGE                    |
| Px002736.1 | -1.3736 | 3.57E-192 | 2.18E-190 | Venom carboxylesterase-6; similar with EST6_APIME                |
| Px006292.1 | -1.3115 | 1.53E-13  | 1.46E-12  | Ecdysteroid UDP-glucosyltransferase; similar with UDPE_NPVSL     |
| Px002735.1 | -1.2993 | 2.03E-97  | 7.10E-96  | Esterase FE4; similar with ESTF_MYZPE                            |
| Px017454.1 | -1.2946 | 1.98E-32  | 3.32E-31  | Liver carboxylesterase; similar with EST1_MESAU                  |
| Px005902.4 | -1.2680 | 1.53E-55  | 3.64E-54  | Cytochrome P450 6B6; similar with CP6B6_HELAM                    |
| Px000089.1 | -1.2537 | 7.16E-31  | 1.16E-29  | Acetylcholinesterase; similar with ACES_FELCA                    |
| Px001164.1 | -1.2470 | 1.19E-129 | 5.15E-128 | UDP-glucuronosyltransferase; similar with UGT3_PLEPL             |
| Px010678.1 | -1.1851 | 7.84E-05  | 3.39E-04  | Ecdysteroid UDP-glucosyltransferase; similar with UDPE_NPVSL     |
| Px017253.1 | -1.1579 | 3.91E-33  | 6.66E-32  | Cytochrome P450 6B2; similar with CP6B2_HELAM                    |
| Px001162.1 | -1.1273 | 1.39E-70  | 3.89E-69  | UDP-glucuronosyltransferase 2B1; similar with UD2B1_RAT          |
| Px013202.1 | -1.0671 | 1.48E-27  | 2.20E-26  | UDP-glucuronosyltransferase 2C1; similar with UD2C1_RABIT        |
| Px017996.1 | -1.0647 | 8.55E-47  | 1.83E-45  | Acetylcholinesterase; similar with ACES_HUMAN                    |
| Px002723.1 | -1.0254 | 5.27E-169 | 2.82E-167 | Cytochrome P450 6B7; similar with CP6B7_HELAM                    |

Px003352.1 -1.0082 2.58E-07 1.55E-06 Venom carboxylesterase-6; similar with EST6\_APIME

#### **Involved in drug metabolism - cytochrome P450**

Px015080.1 1.5382 2.00E-23 2.70E-22 Ecdysteroid UDP-glucosyltransferase; similar with UDPE\_NPVMB  
Px013145.1 1.0351 2.01E-231 1.45E-229 Cytochrome P450 6B7; similar with CP6B7\_HELAM  
Px015079.1 -3.1595 1.17E-07 7.28E-07 Ecdysteroid UDP-glucosyltransferase; similar with UDPE\_NPVSL  
Px004854.1 -2.7504 3.14E-20 3.86E-19 Ecdysteroid UDP-glucosyltransferase; similar with UDPE\_NPVSL  
Px011987.1 -2.3364 2.05E-16 2.21E-15 Amine oxidase [flavin-containing] B; similar with AOFB\_MOUSE  
Px014217.1 -1.9896 7.35E-20 8.93E-19 Cytochrome P450 6k1; similar with CP6K1\_BLAGE  
Px000872.2 -1.9896 8.91E-10 6.55E-09 Ecdysteroid UDP-glucosyltransferase; similar with UDPE\_NPVSL  
Px005900.1 -1.9164 8.05E-36 1.43E-34 Cytochrome P450 6B2; similar with CP6B2\_HELAM  
Px015078.1 -1.6900 8.07E-07 4.58E-06 Ecdysteroid UDP-glucosyltransferase; similar with UDPE\_NPVSL  
Px014216.1 -1.5409 2.47E-29 3.84E-28 Cytochrome P450 6B6; similar with CP6B6\_HELAM  
Px013958.1 -1.5363 1.75E-141 8.12E-140 Cytochrome P450 6k1; similar with CP6K1\_BLAGE  
Px000790.1 -1.5164 2.95E-29 4.57E-28 Glutathione S-transferase 1; similar with GSTT1\_MANSE  
Px006292.1 -1.3115 1.53E-13 1.46E-12 Ecdysteroid UDP-glucosyltransferase; similar with UDPE\_NPVSL  
Px005902.4 -1.2680 1.53E-55 3.64E-54 Cytochrome P450 6B6; similar with CP6B6\_HELAM  
Px006106.1 -1.2511 1.12E-164 5.90E-163 Glutathione S-transferase 1; similar with GSTT1\_MANSE  
Px001164.1 -1.2470 1.19E-129 5.15E-128 UDP-glucuronosyltransferase; similar with UGT3\_PLEPL  
Px010678.1 -1.1851 7.84E-05 3.39E-04 Ecdysteroid UDP-glucosyltransferase; similar with UDPE\_NPVSL  
Px017253.1 -1.1579 3.91E-33 6.66E-32 Cytochrome P450 6B2; similar with CP6B2\_HELAM  
Px001162.1 -1.1273 1.39E-70 3.89E-69 UDP-glucuronosyltransferase 2B1; similar with UD2B1\_RAT  
Px013202.1 -1.0671 1.48E-27 2.20E-26 UDP-glucuronosyltransferase 2C1; similar with UD2C1\_RABIT  
Px002723.1 -1.0254 5.27E-169 2.82E-167 Cytochrome P450 6B7; similar with CP6B7\_HELAM

#### **Involved in complement and coagulation cascades**

Px005668.1 2.7474 1.53E-07 9.40E-07 NGFI-A-binding protein homolog; similar with NAB\_DROME  
Px006739.1 1.8778 0.00E+00 0.00E+00 Putative trypsin Inhibitor like cysteine rich domain protein  
Px013792.1 1.1458 6.31E-33 1.07E-31 Thrombospondin type-1 domain-containing protein 7A  
Px012678.4 1.1408 3.74E-05 1.71E-04 Locomotion-related protein Hikaru genki; similar with HIG\_DROME  
Px003000.1 ##### 1.59E-40 3.09E-39 Transmembrane protease serine 6; similar with TMPS6\_MOUSE  
Px015905.1 -4.2248 3.15E-52 7.24E-51 Transmembrane protease serine 6; similar with TMPS6\_MOUSE  
Px004167.1 -2.5442 5.53E-08 3.53E-07 Plasma kallikrein; similar with KLKB1\_MOUSE  
Px016549.2 -2.4814 1.62E-07 9.92E-07 Glia-derived nexin; similar with GDN\_MOUSE  
Px016053.1 -2.2883 3.96E-32 6.55E-31 Trypsin; similar with TRYP\_PHACE  
Px005947.1 -1.8827 5.51E-09 3.84E-08 Serine proteinase stubble; similar with STUB\_DROME  
Px004168.1 -1.4433 1.50E-05 7.32E-05 Plasma kallikrein; similar with KLKB1\_HUMAN  
Px007357.2 -1.3810 0.00E+00 0.00E+00 Serine proteinase stubble; similar with STUB\_DROME  
Px007757.1 -1.3200 2.18E-11 1.81E-10 Putative trypsin Inhibitor like cysteine rich domain protein  
Px006864.1 -1.0865 1.30E-14 1.30E-13 Serine protease snake; similar with SNAK\_DROME

#### **Involved in lysosome**

Px007889.1 1.9173 7.13E-06 3.66E-05 V-type proton ATPase 116 kDa subunit a isoform 1  
Px007446.1 1.3698 1.05E-25 1.50E-24 Alpha-N-acetylgalactosaminidase; similar with NAGAB\_CHICK  
Px003790.1 1.1669 0.00E+00 0.00E+00 Testicular acid phosphatase homolog; similar with PPAT\_XENLA  
Px007749.1 1.1513 1.29E-09 9.37E-09 Unknown function  
Px006262.1 1.0468 2.05E-19 2.46E-18 Lipase 3; similar with LIP3\_DROME  
Px006315.2 1.0426 1.25E-21 1.59E-20 Lysosomal alpha-glucosidase; similar with LYAG\_MOUSE  
Px010775.1 -3.0540 6.34E-76 1.89E-74 Putative inorganic phosphate cotransporter  
Px009691.1 -2.4128 3.95E-17 4.40E-16 Lipase 1; similar with LIP1\_DROME



|            |         |           |           |                                                          |
|------------|---------|-----------|-----------|----------------------------------------------------------|
| Px001913.1 | -1.9424 | 2.00E-107 | 7.50E-106 | Gastric triacylglycerol lipase; similar with LIPG_RAT    |
| Px013680.1 | -1.8855 | 4.80E-30  | 7.62E-29  | Sialin; similar with S17A5_HUMAN                         |
| Px012695.1 | -1.8366 | 2.01E-82  | 6.33E-81  | Lipase 1; similar with LIP1_DROME                        |
| Px005804.1 | -1.8351 | 1.46E-67  | 3.90E-66  | Lipase 1; similar with LIP1_DROME                        |
| Px004426.1 | -1.8092 | 9.99E-104 | 3.65E-102 | Niemann-Pick C1 protein; similar with NPC1_MOUSE         |
| Px013556.1 | -1.7544 | 0.00E+00  | 0.00E+00  | Flexible cuticle protein 12; similar with CU12_HYACE     |
| Px003742.1 | -1.6686 | 1.74E-27  | 2.57E-26  | Sphingomyelin phosphodiesterase; similar with ASM_HUMAN  |
| Px005805.1 | -1.6287 | 1.50E-16  | 1.63E-15  | Lipase 1; similar with LIP1_DROME                        |
| Px008080.1 | -1.5900 | 1.25E-08  | 8.47E-08  | Lysosome membrane protein 2; similar with SCRB2_HUMAN    |
| Px013679.1 | -1.5509 | 2.16E-10  | 1.69E-09  | Putative inorganic phosphate cotransporter               |
| Px012829.1 | -1.4307 | 7.16E-96  | 2.47E-94  | Tetraspanin-17; similar with TSN17_RAT                   |
| Px004605.1 | -1.2838 | 2.12E-41  | 4.20E-40  | Sphingomyelin phosphodiesterase; similar with ASM_HUMAN  |
| Px016066.1 | -1.2734 | 1.11E-10  | 8.80E-10  | Lipase member M; similar with LIPM_MOUSE                 |
| Px013678.1 | -1.2380 | 4.66E-21  | 5.85E-20  | Putative inorganic phosphate cotransporter               |
| Px004125.2 | -1.1955 | 2.64E-120 | 1.09E-118 | Sulfatase-modifying factor 1; similar with SUMF1_MOUSE   |
| Px002047.1 | -1.1417 | 3.74E-76  | 1.12E-74  | Uncharacterized family 31 glucosidase KIAA1161           |
| Px011477.2 | -1.1127 | 3.00E-99  | 1.07E-97  | Lipase 1; similar with LIP1_DROME                        |
| Px001079.1 | -1.1085 | 0.00E+00  | 0.00E+00  | Unknown function                                         |
| Px011475.1 | -1.0965 | 2.90E-126 | 1.23E-124 | Lipase 3; similar with LIP3_DROME                        |
| Px011111.1 | -1.0868 | 1.63E-31  | 2.67E-30  | Ecdysteroid-regulated protein; similar with B6A8L2_HELAM |

#### **Involved in metabolic pathways**

|            |        |           |           |                                                                  |
|------------|--------|-----------|-----------|------------------------------------------------------------------|
| Px009455.1 | 4.0104 | 1.36E-04  | 5.61E-04  | Uridylate kinase; similar with UMPK_ARATH                        |
| Px006540.1 | 2.3796 | 2.18E-05  | 1.04E-04  | ACYPI009600 protein; similar with C4WT25_ACYPI                   |
| Px003101.1 | 2.0104 | 6.13E-07  | 3.53E-06  | Tyramine beta-hydroxylase; similar with TBH1_DROME               |
| Px013955.1 | 1.9862 | 1.32E-07  | 8.12E-07  | Neuroigin-1; similar with NLGN1_HUMAN                            |
| Px006993.1 | 1.9490 | 4.43E-06  | 2.32E-05  | Polypeptide N-acetylgalactosaminyltransferase 1                  |
| Px007889.1 | 1.9173 | 7.13E-06  | 3.66E-05  | V-type proton ATPase 116 kDa subunit a isoform 1                 |
| Px007720.1 | 1.7166 | 5.06E-56  | 1.21E-54  | Catalase; similar with CATA_GLARU                                |
| Px015393.1 | 1.7108 | 7.79E-06  | 3.96E-05  | Gag-like protein; similar with Q9BPP9_BOMMO                      |
| Px015148.1 | 1.6885 | 2.11E-05  | 1.01E-04  | ATP synthase subunit beta, mitochondrial; similar with ATPB_RAT  |
| Px009818.1 | 1.6813 | 1.48E-158 | 7.58E-157 | Putative aldehyde oxidase-like protein; similar with ALDOL_ORYSJ |
| Px016786.1 | 1.6161 | 5.93E-07  | 3.42E-06  | Peroxidase; similar with PERO_DROME                              |
| Px004229.1 | 1.5931 | 1.10E-50  | 2.49E-49  | Retrovirus-related Pol polyprotein LINE-1                        |
| Px007722.1 | 1.5425 | 3.70E-39  | 6.99E-38  | Catalase; similar with CATA_PONAB                                |
| Px015080.1 | 1.5382 | 2.00E-23  | 2.70E-22  | Ecdysteroid UDP-glucosyltransferase; similar with UDPE_NPVMB     |
| Px012983.1 | 1.5250 | 9.55E-06  | 4.79E-05  | Folypolyglutamate synthase, mitochondrial                        |
| Px007028.1 | 1.5228 | 0.00E+00  | 0.00E+00  | Arylphorin subunit alpha; similar with ARYA_MANSE                |
| Px012332.1 | 1.4063 | 6.88E-21  | 8.59E-20  | ATP synthase subunit beta, mitochondrial                         |
| Px009277.1 | 1.3870 | 8.25E-50  | 1.84E-48  | Probable aconitate hydratase, mitochondrial                      |
| Px001209.1 | 1.3865 | 0.00E+00  | 0.00E+00  | Catalase; similar with CATA_PIG                                  |
| Px013482.1 | 1.3839 | 6.02E-05  | 2.65E-04  | Exostosin-1; similar with EXT1_DROME                             |
| Px002634.1 | 1.3665 | 2.50E-05  | 1.18E-04  | Beta-1,4-N-acetylgalactosaminyltransferase bre-4                 |
| Px014748.1 | 1.3175 | 1.52E-91  | 5.11E-90  | Unknown function                                                 |
| Px011844.1 | 1.3123 | 8.80E-10  | 6.47E-09  | Adenylate kinase 7; similar with KAD7_MOUSE                      |
| Px002394.3 | 1.3100 | 2.66E-90  | 8.90E-89  | D-beta-hydroxybutyrate dehydrogenase, mitochondrial              |
| Px010889.1 | 1.2841 | 3.14E-12  | 2.76E-11  | LINE-1 reverse transcriptase homolog; similar with LIN1_NYCCO    |
| Px012442.1 | 1.2592 | 3.07E-66  | 8.07E-65  | Peroxidase; similar with PERO_DROME                              |
| Px018009.1 | 1.2456 | 1.71E-07  | 1.04E-06  | Cytosol aminopeptidase; similar with AMPL_HUMAN                  |
| Px007568.1 | 1.2449 | 1.13E-05  | 5.63E-05  | Sesquipedalian-1; similar with SESQ1_MOUSE                       |

|            |         |           |           |                                                                      |
|------------|---------|-----------|-----------|----------------------------------------------------------------------|
| Px005927.1 | 1.1989  | 2.34E-06  | 1.27E-05  | Beta-1,3-galactosyltransferase 5; similar with B3GT5_MOUSE           |
| Px010267.1 | 1.1863  | 2.29E-04  | 9.08E-04  | Inositol polyphosphate 1-phosphatase; similar with INPP_MOUSE        |
| Px013191.1 | 1.1200  | 6.80E-09  | 4.69E-08  | Aromatic-L-amino-acid decarboxylase; similar with DDC_RAT            |
| Px000615.1 | 1.0950  | 2.04E-34  | 3.56E-33  | Retinol dehydrogenase 11; similar with RDH11_HUMAN                   |
| Px011830.5 | 1.0868  | 1.41E-05  | 6.90E-05  | DNA polymerase epsilon catalytic subunit A                           |
| Px012229.1 | 1.0709  | 2.01E-04  | 8.06E-04  | Probable UDP-glucose 4-epimerase; similar with GALE_DROME            |
| Px009343.1 | 1.0610  | 3.15E-06  | 1.68E-05  | NADH-ubiquinone oxidoreductase 75 kDa subunit, mitochondrial         |
| Px006262.1 | 1.0468  | 2.05E-19  | 2.46E-18  | Lipase 3; similar with LIP3_DROME                                    |
| Px006315.2 | 1.0426  | 1.25E-21  | 1.59E-20  | Lysosomal alpha-glucosidase; similar with LYAG_MOUSE                 |
| Px013145.1 | 1.0351  | 2.01E-231 | 1.45E-229 | Cytochrome P450 6B7; similar with CP6B7_HELAM                        |
| Px013390.1 | 1.0237  | 1.15E-05  | 5.72E-05  | NADH dehydrogenase [ubiquinone] iron-sulfur protein 3, mitochondrial |
| Px002247.1 | 1.0224  | 1.35E-34  | 2.37E-33  | ADP-dependent glucokinase; similar with ADPGK_MOUSE                  |
| Px010954.1 | 1.0211  | 1.09E-06  | 6.08E-06  | Probable DNA-directed RNA polymerases I and III subunit RPAC2        |
| Px014253.1 | #####   | 3.43E-14  | 3.37E-13  | Unknown function                                                     |
| Px000337.1 | -5.6413 | 6.62E-147 | 3.17E-145 | Osiris 19; similar with B6DXA8_BOMMO                                 |
| Px000336.1 | -5.1595 | 2.16E-92  | 7.30E-91  | Osiris 20; similar with B6DXA7_BOMMO                                 |
| Px014975.1 | -4.7969 | 6.48E-08  | 4.10E-07  | Alcohol dehydrogenase [NADP+] A; similar with A1A1A_DANRE            |
| Px005494.1 | -4.6043 | 1.32E-59  | 3.26E-58  | Tubulin polyglutamylase TTLL6; similar with TTLL6_MOUSE              |
| Px010126.1 | -4.2842 | 5.01E-37  | 9.15E-36  | DNA-directed RNA polymerase II subunit RPB1                          |
| Px000024.1 | -4.2375 | 2.27E-05  | 1.07E-04  | Cuticular protein CPG4; similar with B2DBL4_9NEOP                    |
| Px010831.1 | -3.6714 | 6.10E-17  | 6.72E-16  | Luciferin 4-monooxygenase; similar with LUCI_PHOPE                   |
| Px016492.1 | -3.3845 | 4.82E-55  | 1.14E-53  | Luciferin 4-monooxygenase; similar with LUCI_LUCCR                   |
| Px003251.1 | -3.2604 | 5.86E-42  | 1.17E-40  | Putative cuticle protein; similar with C0H6E8_BOMMO                  |
| Px015079.1 | -3.1595 | 1.17E-07  | 7.28E-07  | Ecdysteroid UDP-glucosyltransferase; similar with UDPE_NPVSL         |
| Px016235.1 | -3.0771 | 3.82E-10  | 2.90E-09  | 3-oxoacyl-[acyl-carrier-protein] reductase FabG                      |
| Px007180.1 | -2.9490 | 1.26E-24  | 1.76E-23  | Juvenile hormone esterase; similar with ESTJ_HELVI                   |
| Px014796.1 | -2.7969 | 1.80E-13  | 1.70E-12  | Apyrase; similar with APY_AEDAE                                      |
| Px004854.1 | -2.7504 | 3.14E-20  | 3.86E-19  | Ecdysteroid UDP-glucosyltransferase; similar with UDPE_NPVSL         |
| Px008866.1 | -2.7311 | 8.72E-18  | 9.93E-17  | Chorion peroxidase; similar with PERC_DROME                          |
| Px013527.1 | -2.6900 | 3.73E-05  | 1.71E-04  | Carbonyl reductase [NADPH] 1; similar with CBR1_RABIT                |
| Px018069.2 | -2.6785 | 1.96E-29  | 3.05E-28  | 3-ketoacyl-CoA thiolase, mitochondrial; similar with THIM_HUMAN      |
| Px011757.1 | -2.5132 | 1.72E-33  | 2.95E-32  | Esterase FE4; similar with ESTF_MYZPE                                |
| Px002199.1 | -2.4921 | 5.49E-06  | 2.86E-05  | 4-coumarate--CoA ligase-like 5; similar with 4CLL5_ARATH             |
| Px009691.1 | -2.4128 | 3.95E-17  | 4.40E-16  | Lipase 1; similar with LIP1_DROME                                    |
| Px006617.2 | -2.3588 | 1.63E-21  | 2.07E-20  | Chorion peroxidase; similar with PERC_DROME                          |
| Px011987.1 | -2.3364 | 2.05E-16  | 2.21E-15  | Amine oxidase [flavin-containing] B; similar with AOFB_MOUSE         |
| Px004490.1 | -2.2872 | 1.08E-212 | 7.20E-211 | Adenosine deaminase CECR1; similar with CECR1_XENLA                  |
| Px002274.1 | -2.2838 | 8.00E-307 | 7.21E-305 | Phenoloxidase subunit 2; similar with PRP2_BOMMO                     |
| Px003155.2 | -2.2612 | 3.08E-22  | 4.00E-21  | Retrovirus-related Pol polyprotein from transposon 17.6              |
| Px009159.1 | -2.2120 | 2.35E-06  | 1.27E-05  | Alpha-aminoadipic semialdehyde synthase, mitochondrial               |
| Px008598.1 | -2.2120 | 4.51E-08  | 2.90E-07  | Phosphatidylinositol glycan anchor biosynthesis class U protein      |
| Px011550.1 | -2.1807 | 1.46E-17  | 1.65E-16  | Glycerate kinase; similar with GLCTK_RAT                             |
| Px003540.1 | -2.1707 | 6.03E-47  | 1.29E-45  | Hexokinase type 2; similar with HXK2_DROME                           |
| Px016518.1 | -2.0402 | 1.22E-07  | 7.55E-07  | Ribulose-phosphate 3-epimerase; similar with RPE_MOUSE               |
| Px015642.1 | -2.0171 | 5.29E-07  | 3.08E-06  | Estradiol 17-beta-dehydrogenase 8; similar with DHB8_CANFA           |
| Px014217.1 | -1.9896 | 7.35E-20  | 8.93E-19  | Cytochrome P450 6k1; similar with CP6K1_BLAGE                        |
| Px000872.2 | -1.9896 | 8.91E-10  | 6.55E-09  | Ecdysteroid UDP-glucosyltransferase; similar with UDPE_NPVSL         |
| Px012011.2 | -1.9715 | 3.54E-204 | 2.27E-202 | Pancreatic triacylglycerol lipase; similar with LIPP_MYOCO           |
| Px011686.1 | -1.9569 | 3.07E-28  | 4.64E-27  | 5-formyltetrahydrofolate cyclo-ligase                                |
| Px008276.1 | -1.9483 | 1.70E-213 | 1.14E-211 | Membrane alanyl aminopeptidase; similar with AMPM_HELVI              |
| Px001913.1 | -1.9424 | 2.00E-107 | 7.50E-106 | Gastric triacylglycerol lipase; similar with LIPG_RAT                |

|            |         |           |           |                                                                   |
|------------|---------|-----------|-----------|-------------------------------------------------------------------|
| Px003486.1 | -1.9201 | 1.08E-287 | 9.35E-286 | Probable maltase H; similar with MAL2_DROME                       |
| Px005900.1 | -1.9164 | 8.05E-36  | 1.43E-34  | Cytochrome P450 6B2; similar with CP6B2_HELAM                     |
| Px000359.2 | -1.8693 | 2.82E-10  | 2.17E-09  | Alpha-methyl dopa hypersensitive protein                          |
| Px001371.1 | -1.8641 | 1.23E-06  | 6.87E-06  | Aminoacylase-1A; similar with ACY1A_RAT                           |
| Px008278.1 | -1.8417 | 1.19E-27  | 1.77E-26  | Membrane alanyl aminopeptidase; similar with AMPM_MANSE           |
| Px012695.1 | -1.8366 | 2.01E-82  | 6.33E-81  | Lipase 1; similar with LIP1_DROME                                 |
| Px005804.1 | -1.8351 | 1.46E-67  | 3.90E-66  | Lipase 1; similar with LIP1_DROME                                 |
| Px011049.1 | -1.8032 | 1.05E-22  | 1.38E-21  | Acetylcholinesterase; similar with ACES_FELCA                     |
| Px004610.1 | -1.7646 | 2.93E-50  | 6.58E-49  | Sphingosine-1-phosphate lyase; similar with SGPL_DROME            |
| Px016080.1 | -1.7601 | 1.66E-06  | 9.14E-06  | Glucosamine-6-phosphate isomerase; similar with GNPI_AEDAE        |
| Px009077.7 | -1.7541 | 1.06E-244 | 8.14E-243 | ATP-citrate synthase; similar with ACLY_BOVIN                     |
| Px011755.1 | -1.7175 | 1.14E-37  | 2.10E-36  | Antennal esterase CXE4; similar with D3GDL5_SPOLI                 |
| Px002187.1 | -1.7145 | 1.31E-11  | 1.11E-10  | Alpha-amino adipic semialdehyde synthase, mitochondrial           |
| Px002926.1 | -1.6997 | 7.49E-30  | 1.18E-28  | Choline dehydrogenase, mitochondrial; similar with CHDH_HUMAN     |
| Px015078.1 | -1.6900 | 8.07E-07  | 4.58E-06  | Ecdysteroid UDP-glucosyltransferase; similar with UDPE_NPVSL      |
| Px017452.1 | -1.6900 | 1.43E-04  | 5.92E-04  | Putative uncharacterized protein; similar with D6WQR2_TRICA       |
| Px000123.1 | -1.6773 | 1.05E-300 | 9.40E-299 | Putative aldehyde dehydrogenase family 7 member A1 homolog        |
| Px009007.1 | -1.6741 | 4.83E-05  | 2.16E-04  | 4-coumarate--CoA ligase-like 5; similar with 4CLL5_ARATH          |
| Px003742.1 | -1.6686 | 1.74E-27  | 2.57E-26  | Sphingomyelin phosphodiesterase; similar with ASM_HUMAN           |
| Px005805.1 | -1.6287 | 1.50E-16  | 1.63E-15  | Lipase 1; similar with LIP1_DROME                                 |
| Px013509.3 | -1.6243 | 4.97E-06  | 2.60E-05  | Phosphatidylinositol-4-phosphate 5-kinase type-1 gamma            |
| Px014078.1 | -1.6118 | 5.34E-26  | 7.67E-25  | Fructose-bisphosphate aldolase; similar with ALF_DROME            |
| Px000763.1 | -1.5860 | 3.76E-11  | 3.08E-10  | Acetyl-CoA carboxylase; similar with ACAC_CHICK                   |
| Px016709.1 | -1.5845 | 1.40E-23  | 1.90E-22  | Glucosamine-6-phosphate isomerase; similar with GNPI_AEDAE        |
| Px016655.1 | -1.5797 | 5.94E-23  | 7.89E-22  | Luciferin 4-monooxygenase; similar with LUCI_LUCCR                |
| Px013169.1 | -1.5746 | 8.44E-13  | 7.70E-12  | Lactase-phlorizin hydrolase; similar with LPH_HUMAN               |
| Px016493.1 | -1.5635 | 1.34E-30  | 2.15E-29  | Luciferin 4-monooxygenase; similar with LUCI_LUCMI                |
| Px002140.1 | -1.5608 | 5.78E-156 | 2.90E-154 | Alpha-amino adipic semialdehyde synthase, mitochondrial           |
| Px000084.1 | -1.5608 | 5.40E-17  | 5.96E-16  | Cysteine sulfinic acid decarboxylase; similar with CSAD_HUMAN     |
| Px015569.1 | -1.5545 | 1.85E-38  | 3.45E-37  | 3-oxoacyl-[acyl-carrier-protein] reductase FabG                   |
| Px014216.1 | -1.5409 | 2.47E-29  | 3.84E-28  | Cytochrome P450 6B6; similar with CP6B6_HELAM                     |
| Px013958.1 | -1.5363 | 1.75E-141 | 8.12E-140 | Cytochrome P450 6k1; similar with CP6K1_BLAGE                     |
| Px011916.1 | -1.4712 | 3.87E-17  | 4.31E-16  | 3-hydroxyisobutyryl-CoA hydrolase, mitochondrial                  |
| Px003205.1 | -1.4688 | 1.09E-07  | 6.74E-07  | Envelope fusion protein; similar with ENV_NPVL                    |
| Px005799.4 | -1.4526 | 2.86E-08  | 1.87E-07  | Probable 4-coumarate--CoA ligase 3; similar with 4CL3_ORYSJ       |
| Px008322.1 | -1.4354 | 1.34E-06  | 7.40E-06  | Aminoacylase-1A; similar with ACY1A_RAT                           |
| Px004354.1 | -1.4211 | 4.63E-28  | 6.96E-27  | UDP-N-acetylhexosamine pyrophosphorylase-like protein 1           |
| Px009815.1 | -1.4145 | 5.08E-245 | 3.93E-243 | Pyrroline-5-carboxylate reductase; similar with P5CR_SOYBN        |
| Px015448.1 | -1.4118 | 1.12E-05  | 5.59E-05  | Acetyl-CoA carboxylase; similar with ACAC_CHICK                   |
| Px002027.1 | -1.4107 | 1.31E-11  | 1.10E-10  | L-sorbose 1-dehydrogenase; similar with SDH_GLUOX                 |
| Px012806.2 | -1.4027 | 4.47E-17  | 4.96E-16  | Luciferin 4-monooxygenase; similar with LUCI_LUCCR                |
| Px003013.3 | -1.3887 | 5.16E-201 | 3.25E-199 | Lipoyltransferase 1, mitochondrial; similar with LIPT_MOUSE       |
| Px014887.1 | -1.3881 | 2.57E-59  | 6.32E-58  | Dihydropteridine reductase; similar with DHPR_RAT                 |
| Px013730.1 | -1.3842 | 3.22E-26  | 4.64E-25  | Myosinase 1; similar with MYRO1_BREBR                             |
| Px005277.3 | -1.3778 | 0.00E+00  | 0.00E+00  | Lactase-phlorizin hydrolase; similar with LPH_HUMAN               |
| Px002736.1 | -1.3736 | 3.57E-192 | 2.18E-190 | Venom carboxylesterase-6; similar with EST6_APIME                 |
| Px007493.1 | -1.3725 | 1.02E-157 | 5.15E-156 | Delta-1-pyrroline-5-carboxylate synthase; similar with P5CS_PONAB |
| Px015449.1 | -1.3608 | 1.13E-08  | 7.71E-08  | Acetyl-CoA carboxylase 1; similar with ACACA_SHEEP                |
| Px002115.1 | -1.3555 | 1.38E-38  | 2.58E-37  | 5-formyltetrahydrofolate cyclo-ligase; similar with MTHFS_HUMAN   |
| Px012400.1 | -1.3371 | 1.19E-21  | 1.52E-20  | Argininosuccinate lyase; similar with ARLY2_ANAPL                 |
| Px004065.1 | -1.3335 | 3.00E-07  | 1.79E-06  | Mannosyl-oligosaccharide alpha-1,2-mannosidase isoform A          |

|            |         |           |           |                                                                |
|------------|---------|-----------|-----------|----------------------------------------------------------------|
| Px011713.1 | -1.3121 | 1.24E-67  | 3.32E-66  | Fatty acid synthase; similar with FAS_HUMAN                    |
| Px006292.1 | -1.3115 | 1.53E-13  | 1.46E-12  | Ecdysteroid UDP-glucosyltransferase; similar with UDPE_NPVSL   |
| Px011707.1 | -1.3115 | 3.98E-38  | 7.39E-37  | Amidophosphoribosyltransferase; similar with PUR1_DROME        |
| Px000825.3 | -1.3000 | 8.64E-37  | 1.57E-35  | Ferrochelataase, mitochondrial; similar with HEMH_DROME        |
| Px011984.1 | -1.2997 | 6.98E-94  | 2.38E-92  | Ribose-phosphate pyrophosphokinase 1; similar with PRPS1_RAT   |
| Px002735.1 | -1.2993 | 2.03E-97  | 7.10E-96  | Esterase FE4; similar with ESTF_MYZPE                          |
| Px002859.2 | -1.2971 | 3.12E-99  | 1.11E-97  | Bifunctional purine biosynthesis protein PURH                  |
| Px004605.1 | -1.2838 | 2.12E-41  | 4.20E-40  | Sphingomyelin phosphodiesterase; similar with ASM_HUMAN        |
| Px014232.1 | -1.2808 | 1.50E-06  | 8.27E-06  | Pantothenate kinase 2, mitochondrial; similar with PANK2_HUMAN |
| Px012794.1 | -1.2769 | 2.19E-09  | 1.57E-08  | Methylcrotonoyl-CoA carboxylase subunit alpha, mitochondrial   |
| Px016066.1 | -1.2734 | 1.11E-10  | 8.80E-10  | Lipase member M; similar with LIPM_MOUSE                       |
| Px011885.3 | -1.2703 | 2.13E-76  | 6.43E-75  | Bifunctional purine biosynthesis protein PURH                  |
| Px005902.4 | -1.2680 | 1.53E-55  | 3.64E-54  | Cytochrome P450 6B6; similar with CP6B6_HELAM                  |
| Px012677.1 | -1.2571 | 7.62E-05  | 3.30E-04  | Lipase member H-A; similar with LIPHA_XENLA                    |
| Px000765.5 | -1.2565 | 1.62E-21  | 2.05E-20  | Acetyl-CoA carboxylase; similar with ACAC_CHICK                |
| Px000089.1 | -1.2537 | 7.16E-31  | 1.16E-29  | Acetylcholinesterase; similar with ACES_FELCA                  |
| Px001164.1 | -1.2470 | 1.19E-129 | 5.15E-128 | UDP-glucuronosyltransferase; similar with UGT3_PLEPL           |
| Px013937.1 | -1.2420 | 1.18E-05  | 5.88E-05  | 3-ketoacyl-CoA thiolase, mitochondrial                         |
| Px011476.1 | -1.2320 | 1.40E-11  | 1.18E-10  | Lipase 3; similar with LIP3_DROME                              |
| Px012800.1 | -1.2320 | 1.03E-26  | 1.49E-25  | Pyruvate carboxylase 1; similar with PYC1_CAEEL                |
| Px004749.1 | -1.2238 | 0.00E+00  | 0.00E+00  | Lipoprotein lipase; similar with LIPL_CAVPO                    |
| Px006190.1 | -1.2201 | 0.00E+00  | 0.00E+00  | Lipase member H-A; similar with LIPHA_XENLA                    |
| Px016488.1 | -1.2191 | 7.78E-05  | 3.36E-04  | Glucose dehydrogenase [acceptor]; similar with DHGL_DROME      |
| Px004753.1 | -1.2160 | 2.50E-80  | 7.79E-79  | Pancreatic lipase-related protein 2; similar with LIPR2_MYOCO  |
| Px004980.1 | -1.2120 | 1.54E-04  | 6.33E-04  | UMP-CMP kinase; similar with KCY_XENTR                         |
| Px010260.3 | -1.2101 | 1.05E-14  | 1.06E-13  | Alcohol dehydrogenase [NADP+] A; similar with A1A1A_DANRE      |
| Px009776.1 | -1.2078 | 3.55E-07  | 2.10E-06  | Mevalonate kinase; similar with KIME_DICDI                     |
| Px000764.1 | -1.2030 | 2.00E-49  | 4.42E-48  | Acetyl-CoA carboxylase; similar with ACAC_CHICK                |
| Px007878.1 | -1.1969 | 2.78E-39  | 5.29E-38  | 3-hydroxyacyl-CoA dehydrogenase type-2                         |
| Px010678.1 | -1.1851 | 7.84E-05  | 3.39E-04  | Ecdysteroid UDP-glucosyltransferase; similar with UDPE_NPVSL   |
| Px011035.1 | -1.1760 | 5.18E-201 | 3.25E-199 | Ribose-phosphate pyrophosphokinase 2                           |
| Px005884.1 | -1.1728 | 4.40E-98  | 1.54E-96  | Transaldolase; similar with TALDO_CRIGR                        |
| Px003616.1 | -1.1710 | 4.18E-134 | 1.87E-132 | Transaldolase; similar with TALDO_RAT                          |
| Px007863.4 | -1.1641 | 3.18E-109 | 1.21E-107 | 6-phosphogluconate dehydrogenase, decarboxylating              |
| Px017253.1 | -1.1579 | 3.91E-33  | 6.66E-32  | Cytochrome P450 6B2; similar with CP6B2_HELAM                  |
| Px006345.1 | -1.1527 | 6.76E-112 | 2.60E-110 | Pancreatic lipase-related protein 2; similar with LIPR2_MYOCO  |
| Px016079.1 | -1.1519 | 8.64E-06  | 4.36E-05  | Glucosamine-6-phosphate isomerase; similar with GNPI_DROPS     |
| Px016756.1 | -1.1480 | 3.98E-13  | 3.68E-12  | Cytoplasmic aconitate hydratase; similar with ACOC_HUMAN       |
| Px010556.1 | -1.1463 | 0.00E+00  | 0.00E+00  | Probable phosphoserine aminotransferase                        |
| Px009940.2 | -1.1454 | 2.86E-13  | 2.67E-12  | Acetylcholinesterase; similar with ACES_CULPI                  |
| Px002047.1 | -1.1417 | 3.74E-76  | 1.12E-74  | Uncharacterized family 31 glucosidase KIAA1161                 |
| Px016733.1 | -1.1416 | 6.72E-08  | 4.25E-07  | Acyl-CoA synthetase family member 3, mitochondrial             |
| Px009630.1 | -1.1394 | 9.09E-62  | 2.30E-60  | Fatty acid synthase; similar with FAS_CHICK                    |
| Px016278.1 | -1.1364 | 4.19E-07  | 2.46E-06  | Cytoplasmic aconitate hydratase; similar with ACOC_MOUSE       |
| Px011480.1 | -1.1316 | 3.44E-123 | 1.44E-121 | Purine nucleoside phosphorylase; similar with PNPB_BOVIN       |
| Px010509.1 | -1.1311 | 3.30E-11  | 2.72E-10  | Glycerate kinase; similar with GLCTK_RAT                       |
| Px001162.1 | -1.1273 | 1.39E-70  | 3.89E-69  | UDP-glucuronosyltransferase 2B1; similar with UD2B1_RAT        |
| Px002046.1 | -1.1174 | 7.12E-244 | 5.40E-242 | Uncharacterized family 31 glucosidase KIAA1161                 |
| Px012455.1 | -1.1171 | 7.44E-116 | 2.97E-114 | NADP-dependent malic enzyme; similar with MAOX_ANAPL           |
| Px005203.1 | -1.1159 | 3.84E-31  | 6.22E-30  | Glucose-6-phosphate 1-dehydrogenase; similar with G6PD_CERCA   |
| Px011477.2 | -1.1127 | 3.00E-99  | 1.07E-97  | Lipase 1; similar with LIP1_DROME                              |

|            |         |           |           |                                                                     |
|------------|---------|-----------|-----------|---------------------------------------------------------------------|
| Px011791.1 | -1.1123 | 1.16E-291 | 1.01E-289 | Lipase member H; similar with LIPH_XENTR                            |
| Px013315.1 | -1.1099 | 5.18E-256 | 4.15E-254 | Short/branched chain specific acyl-CoA dehydrogenase, mitochondrial |
| Px010660.1 | -1.1027 | 7.41E-19  | 8.78E-18  | Probable general secretion pathway protein D                        |
| Px006668.1 | -1.0988 | 1.89E-26  | 2.75E-25  | Phosphoglucomutase-2; similar with PGM2_HUMAN                       |
| Px011475.1 | -1.0965 | 2.90E-126 | 1.23E-124 | Lipase 3; similar with LIP3_DROME                                   |
| Px011636.4 | -1.0964 | 1.91E-96  | 6.62E-95  | Phosphoribosylformylglycinamide synthase                            |
| Px006816.1 | -1.0920 | 0.00E+00  | 0.00E+00  | 2-oxoisovalerate dehydrogenase subunit alpha, mitochondrial         |
| Px001933.1 | -1.0839 | 3.76E-08  | 2.44E-07  | Myrosinase 1; similar with MYRO1_BREBR                              |
| Px000532.1 | -1.0750 | 2.79E-31  | 4.54E-30  | Hydroxyacid oxidase 1; similar with HAOX1_HUMAN                     |
| Px013202.1 | -1.0671 | 1.48E-27  | 2.20E-26  | UDP-glucuronosyltransferase 2C1; similar with UD2C1_RABIT           |
| Px000644.1 | -1.0662 | 3.37E-06  | 1.79E-05  | Pancreatic triacylglycerol lipase; similar with LIPP_MOUSE          |
| Px000372.1 | -1.0658 | 1.11E-08  | 7.57E-08  | Putative gamma-glutamyltransferase ywrD                             |
| Px017996.1 | -1.0647 | 8.55E-47  | 1.83E-45  | Acetylcholinesterase; similar with ACES_HUMAN                       |
| Px006468.1 | -1.0636 | 1.21E-04  | 5.05E-04  | Adenine phosphoribosyltransferase; similar with APT_DROME           |
| Px016731.1 | -1.0617 | 5.94E-15  | 6.04E-14  | Acyl-CoA synthetase family member 3, mitochondrial                  |
| Px000395.1 | -1.0609 | 0.00E+00  | 0.00E+00  | Alpha-amylase 4N; similar with AM4N_DROAN                           |
| Px006270.1 | -1.0573 | 7.72E-06  | 3.93E-05  | Luciferin 4-monooxygenase; similar with LUCI_PHOPE                  |
| Px011788.2 | -1.0547 | 1.82E-55  | 4.32E-54  | Pancreatic lipase-related protein 2; similar with LIPR2_BOVIN       |
| Px009411.3 | -1.0508 | 1.83E-82  | 5.77E-81  | Trifunctional purine biosynthetic protein adenosine-3               |
| Px014429.1 | -1.0489 | 1.94E-24  | 2.71E-23  | Acetyl-CoA carboxylase; similar with ACAC_CHICK                     |
| Px008848.1 | -1.0387 | 1.30E-48  | 2.85E-47  | Myrosinase 1; similar with MYRO1_BREBR                              |
| Px006643.3 | -1.0372 | 3.20E-28  | 4.84E-27  | Luciferin 4-monooxygenase; similar with LUCI_LUCMI                  |
| Px006720.1 | -1.0369 | 4.84E-05  | 2.17E-04  | Glycerol-3-phosphate acyltransferase 4                              |
| Px012275.1 | -1.0310 | 2.02E-41  | 4.00E-40  | Glucosamine--fructose-6-phosphate aminotransferase [isomerizing] 1  |
| Px002723.1 | -1.0254 | 5.27E-169 | 2.82E-167 | Cytochrome P450 6B7; similar with CP6B7_HELAM                       |
| Px011708.1 | -1.0187 | 1.78E-24  | 2.49E-23  | Amidophosphoribosyltransferase; similar with PUR1_DROME             |
| Px002029.1 | -1.0155 | 2.06E-48  | 4.48E-47  | Oxidoreductase ucpA; similar with UCPA_SALTY                        |
| Px012993.1 | -1.0097 | 3.06E-69  | 8.45E-68  | Multifunctional protein ADE2; similar with PUR6_DROME               |
| Px003352.1 | -1.0082 | 2.58E-07  | 1.55E-06  | Venom carboxylesterase-6; similar with EST6_APIME                   |
| Px011202.1 | -1.0066 | 3.64E-27  | 5.35E-26  | Aromatic-L-amino-acid decarboxylase; similar with DDC_MANSE         |

### Involved in glycerolipid metabolism

|            |         |           |           |                                                            |
|------------|---------|-----------|-----------|------------------------------------------------------------|
| Px007446.1 | 1.3698  | 1.05E-25  | 1.50E-24  | Alpha-N-acetylgalactosaminidase; similar with NAGAB_CHICK  |
| Px006262.1 | 1.0468  | 2.05E-19  | 2.46E-18  | Lipase 3; similar with LIP3_DROME                          |
| Px014975.1 | -4.7969 | 6.48E-08  | 4.10E-07  | Alcohol dehydrogenase [NADP+] A; similar with A1A1A_DANRE  |
| Px007180.1 | -2.9490 | 1.26E-24  | 1.76E-23  | Juvenile hormone esterase; similar with ESTJ_HELVI         |
| Px011757.1 | -2.5132 | 1.72E-33  | 2.95E-32  | Esterase FE4; similar with ESTF_MYZPE                      |
| Px009691.1 | -2.4128 | 3.95E-17  | 4.40E-16  | Lipase 1; similar with LIP1_DROME                          |
| Px011550.1 | -2.1807 | 1.46E-17  | 1.65E-16  | Glycerate kinase; similar with GLCTK_RAT                   |
| Px012011.2 | -1.9715 | 3.54E-204 | 2.27E-202 | Pancreatic triacylglycerol lipase; similar with LIPP_MYOCO |
| Px001913.1 | -1.9424 | 2.00E-107 | 7.50E-106 | Gastric triacylglycerol lipase; similar with LIPG_RAT      |
| Px012695.1 | -1.8366 | 2.01E-82  | 6.33E-81  | Lipase 1; similar with LIP1_DROME                          |
| Px005804.1 | -1.8351 | 1.46E-67  | 3.90E-66  | Lipase 1; similar with LIP1_DROME                          |
| Px011049.1 | -1.8032 | 1.05E-22  | 1.38E-21  | Acetylcholinesterase; similar with ACES_FELCA              |
| Px011755.1 | -1.7175 | 1.14E-37  | 2.10E-36  | Antennal esterase CXE4; similar with D3GDL5_SPOLI          |
| Px000123.1 | -1.6773 | 1.05E-300 | 9.40E-299 | Putative aldehyde dehydrogenase family 7 member A1 homolog |
| Px005805.1 | -1.6287 | 1.50E-16  | 1.63E-15  | Lipase 1; similar with LIP1_DROME                          |
| Px002736.1 | -1.3736 | 3.57E-192 | 2.18E-190 | Venom carboxylesterase-6; similar with EST6_APIME          |
| Px002735.1 | -1.2993 | 2.03E-97  | 7.10E-96  | Esterase FE4; similar with ESTF_MYZPE                      |
| Px016066.1 | -1.2734 | 1.11E-10  | 8.80E-10  | Lipase member M; similar with LIPM_MOUSE                   |
| Px012677.1 | -1.2571 | 7.62E-05  | 3.30E-04  | Lipase member H-A; similar with LIPHA_XENLA                |

|            |         |           |           |                                                                  |
|------------|---------|-----------|-----------|------------------------------------------------------------------|
| Px000089.1 | -1.2537 | 7.16E-31  | 1.16E-29  | Acetylcholinesterase; similar with ACES_FELCA                    |
| Px011476.1 | -1.2320 | 1.40E-11  | 1.18E-10  | Lipase 3; similar with LIP3_DROME                                |
| Px004749.1 | -1.2238 | 0.00E+00  | 0.00E+00  | Lipoprotein lipase; similar with LIPL_CAVPO                      |
| Px006190.1 | -1.2201 | 0.00E+00  | 0.00E+00  | Lipase member H-A; similar with LIPHA_XENLA                      |
| Px004753.1 | -1.2160 | 2.50E-80  | 7.79E-79  | Pancreatic lipase-related protein 2; similar with LIPR2_MYOCO    |
| Px010260.3 | -1.2101 | 1.05E-14  | 1.06E-13  | Alcohol dehydrogenase [NADP+] A; similar with A1A1A_DANRE        |
| Px006345.1 | -1.1527 | 6.76E-112 | 2.60E-110 | Pancreatic lipase-related protein 2; similar with LIPR2_MYOCO    |
| Px009940.2 | -1.1454 | 2.86E-13  | 2.67E-12  | Acetylcholinesterase; similar with ACES_CULPI                    |
| Px010509.1 | -1.1311 | 3.30E-11  | 2.72E-10  | Glycerate kinase; similar with GLCTK_RAT                         |
| Px011477.2 | -1.1127 | 3.00E-99  | 1.07E-97  | Lipase 1; similar with LIP1_DROME                                |
| Px011791.1 | -1.1123 | 1.16E-291 | 1.01E-289 | Lipase member H; similar with LIPH_XENTR                         |
| Px011475.1 | -1.0965 | 2.90E-126 | 1.23E-124 | Lipase 3; similar with LIP3_DROME                                |
| Px000644.1 | -1.0662 | 3.37E-06  | 1.79E-05  | Pancreatic triacylglycerol lipase; similar with LIPP_MOUSE       |
| Px017996.1 | -1.0647 | 8.55E-47  | 1.83E-45  | Acetylcholinesterase; similar with ACES_HUMAN                    |
| Px011788.2 | -1.0547 | 1.82E-55  | 4.32E-54  | Pancreatic lipase-related protein 2; similar with LIPR2_BOVIN    |
| Px006720.1 | -1.0369 | 4.84E-05  | 2.17E-04  | Glycerol-3-phosphate acyltransferase 4; similar with GPAT4_PONAB |
| Px003352.1 | -1.0082 | 2.58E-07  | 1.55E-06  | Venom carboxylesterase-6; similar with EST6_APIME                |

### Involved in starch and sucrose metabolism

|            |         |           |           |                                                                       |
|------------|---------|-----------|-----------|-----------------------------------------------------------------------|
| Px015080.1 | 1.5382  | 2.00E-23  | 2.70E-22  | Ecdysteroid UDP-glucosyltransferase; similar with UDPE_NPVMB          |
| Px006315.2 | 1.0426  | 1.25E-21  | 1.59E-20  | Lysosomal alpha-glucosidase; similar with LYAG_MOUSE                  |
| Px015079.1 | -3.1595 | 1.17E-07  | 7.28E-07  | Ecdysteroid UDP-glucosyltransferase; similar with UDPE_NPVSL          |
| Px004854.1 | -2.7504 | 3.14E-20  | 3.86E-19  | Ecdysteroid UDP-glucosyltransferase; similar with UDPE_NPVSL          |
| Px003540.1 | -2.1707 | 6.03E-47  | 1.29E-45  | Hexokinase type 2; similar with HXK2_DROME                            |
| Px000872.2 | -1.9896 | 8.91E-10  | 6.55E-09  | Ecdysteroid UDP-glucosyltransferase; similar with UDPE_NPVSL          |
| Px003486.1 | -1.9201 | 1.08E-287 | 9.35E-286 | Probable maltase H; similar with MAL2_DROME                           |
| Px015078.1 | -1.6900 | 8.07E-07  | 4.58E-06  | Ecdysteroid UDP-glucosyltransferase; similar with UDPE_NPVSL          |
| Px003205.1 | -1.4688 | 1.09E-07  | 6.74E-07  | Envelope fusion protein; similar with ENV_NPVLD                       |
| Px004726.1 | -1.3861 | 1.31E-17  | 1.48E-16  | Alpha,alpha-trehalose-phosphate synthase [UDP-forming] 56 kDa subunit |
| Px006292.1 | -1.3115 | 1.53E-13  | 1.46E-12  | Ecdysteroid UDP-glucosyltransferase; similar with UDPE_NPVSL          |
| Px001164.1 | -1.2470 | 1.19E-129 | 5.15E-128 | UDP-glucuronosyltransferase; similar with UGT3_PLEPL                  |
| Px002118.1 | -1.2076 | 4.48E-160 | 2.30E-158 | Alpha,alpha-trehalose-phosphate synthase [UDP-forming] A              |
| Px010678.1 | -1.1851 | 7.84E-05  | 3.39E-04  | Ecdysteroid UDP-glucosyltransferase; similar with UDPE_NPVSL          |
| Px002047.1 | -1.1417 | 3.74E-76  | 1.12E-74  | Uncharacterized family 31 glucosidase KIAA1161                        |
| Px001162.1 | -1.1273 | 1.39E-70  | 3.89E-69  | UDP-glucuronosyltransferase 2B1; similar with UD2B1_RAT               |
| Px002046.1 | -1.1174 | 7.12E-244 | 5.40E-242 | Uncharacterized family 31 glucosidase KIAA1161                        |
| Px006668.1 | -1.0988 | 1.89E-26  | 2.75E-25  | Phosphoglucomutase-2; similar with PGM2_HUMAN                         |
| Px013202.1 | -1.0671 | 1.48E-27  | 2.20E-26  | UDP-glucuronosyltransferase 2C1; similar with UD2C1_RABIT             |
| Px000395.1 | -1.0609 | 0.00E+00  | 0.00E+00  | Alpha-amylase 4N; similar with AM4N_DROAN                             |

### Involved in fat digestion and absorption

|            |         |           |           |                                                            |
|------------|---------|-----------|-----------|------------------------------------------------------------|
| Px006262.1 | 1.0468  | 2.05E-19  | 2.46E-18  | Lipase 3; similar with LIP3_DROME                          |
| Px007180.1 | -2.9490 | 1.26E-24  | 1.76E-23  | Juvenile hormone esterase; similar with ESTJ_HELVI         |
| Px011757.1 | -2.5132 | 1.72E-33  | 2.95E-32  | Esterase FE4; similar with ESTF_MYZPE                      |
| Px009691.1 | -2.4128 | 3.95E-17  | 4.40E-16  | Lipase 1; similar with LIP1_DROME                          |
| Px012011.2 | -1.9715 | 3.54E-204 | 2.27E-202 | Pancreatic triacylglycerol lipase; similar with LIPP_MYOCO |
| Px012164.1 | -1.8535 | 4.44E-10  | 3.35E-09  | Protein croquemort; similar with CRQ_DROME                 |
| Px011049.1 | -1.8032 | 1.05E-22  | 1.38E-21  | Acetylcholinesterase; similar with ACES_FELCA              |
| Px011755.1 | -1.7175 | 1.14E-37  | 2.10E-36  | Antennal esterase CXE4; similar with D3GDL5_SPOLI          |
| Px005805.1 | -1.6287 | 1.50E-16  | 1.63E-15  | Lipase 1; similar with LIP1_DROME                          |
| Px008080.1 | -1.5900 | 1.25E-08  | 8.47E-08  | Lysosome membrane protein 2; similar with SCRB2_HUMAN      |

|            |         |           |           |                                                               |
|------------|---------|-----------|-----------|---------------------------------------------------------------|
| Px002736.1 | -1.3736 | 3.57E-192 | 2.18E-190 | Venom carboxylesterase-6; similar with EST6_APIME             |
| Px002735.1 | -1.2993 | 2.03E-97  | 7.10E-96  | Esterase FE4; similar with ESTF_MYZPE                         |
| Px012677.1 | -1.2571 | 7.62E-05  | 3.30E-04  | Lipase member H-A; similar with LIPHA_XENLA                   |
| Px000089.1 | -1.2537 | 7.16E-31  | 1.16E-29  | Acetylcholinesterase; similar with ACES_FELCA                 |
| Px004270.2 | -1.2482 | 1.17E-18  | 1.37E-17  | Microsomal triglyceride transfer protein large subunit        |
| Px006190.1 | -1.2201 | 0.00E+00  | 0.00E+00  | Lipase member H-A; similar with LIPHA_XENLA                   |
| Px004753.1 | -1.2160 | 2.50E-80  | 7.79E-79  | Pancreatic lipase-related protein 2; similar with LIPR2_MYOCO |
| Px006345.1 | -1.1527 | 6.76E-112 | 2.60E-110 | Pancreatic lipase-related protein 2; similar with LIPR2_MYOCO |
| Px009940.2 | -1.1454 | 2.86E-13  | 2.67E-12  | Acetylcholinesterase; similar with ACES_CULPI                 |
| Px016733.1 | -1.1416 | 6.72E-08  | 4.25E-07  | Acyl-CoA synthetase family member 3, mitochondrial            |
| Px011791.1 | -1.1123 | 1.16E-291 | 1.01E-289 | Lipase member H; similar with LIPH_XENTR                      |
| Px000644.1 | -1.0662 | 3.37E-06  | 1.79E-05  | Pancreatic triacylglycerol lipase; similar with LIPP_MOUSE    |
| Px017996.1 | -1.0647 | 8.55E-47  | 1.83E-45  | Acetylcholinesterase; similar with ACES_HUMAN                 |
| Px011788.2 | -1.0547 | 1.82E-55  | 4.32E-54  | Pancreatic lipase-related protein 2; similar with LIPR2_BOVIN |
| Px001510.4 | -1.0333 | 6.73E-37  | 1.23E-35  | Scavenger receptor class B member 1; similar with SCRB1_PIG   |
| Px011529.1 | -1.0272 | 4.23E-66  | 1.11E-64  | Apolipoporphins; similar with APLP_LOCFI                      |
| Px008150.1 | -1.0244 | 6.04E-08  | 3.84E-07  | Scavenger receptor class B member 1; similar with SCRB1_PIG   |
| Px012163.2 | -1.0220 | 6.81E-12  | 5.85E-11  | Protein croquemort; similar with CRQ_DROME                    |
| Px003352.1 | -1.0082 | 2.58E-07  | 1.55E-06  | Venom carboxylesterase-6; similar with EST6_APIME             |

#### **Involved in metabolism of xenobiotics by cytochrome P450**

|            |         |           |           |                                                              |
|------------|---------|-----------|-----------|--------------------------------------------------------------|
| Px015080.1 | 1.5382  | 2.00E-23  | 2.70E-22  | Ecdysteroid UDP-glucosyltransferase; similar with UDPE_NPVMB |
| Px013145.1 | 1.0351  | 2.01E-231 | 1.45E-229 | Cytochrome P450 6B7; similar with CP6B7_HELAM                |
| Px015079.1 | -3.1595 | 1.17E-07  | 7.28E-07  | Ecdysteroid UDP-glucosyltransferase; similar with UDPE_NPVSL |
| Px004854.1 | -2.7504 | 3.14E-20  | 3.86E-19  | Ecdysteroid UDP-glucosyltransferase; similar with UDPE_NPVSL |
| Px013527.1 | -2.6900 | 3.73E-05  | 1.71E-04  | Carbonyl reductase [NADPH] 1; similar with CBR1_RABIT        |
| Px014217.1 | -1.9896 | 7.35E-20  | 8.93E-19  | Cytochrome P450 6k1; similar with CP6K1_BLAGE                |
| Px000872.2 | -1.9896 | 8.91E-10  | 6.55E-09  | Ecdysteroid UDP-glucosyltransferase; similar with UDPE_NPVSL |
| Px005900.1 | -1.9164 | 8.05E-36  | 1.43E-34  | Cytochrome P450 6B2; similar with CP6B2_HELAM                |
| Px015078.1 | -1.6900 | 8.07E-07  | 4.58E-06  | Ecdysteroid UDP-glucosyltransferase; similar with UDPE_NPVSL |
| Px014216.1 | -1.5409 | 2.47E-29  | 3.84E-28  | Cytochrome P450 6B6; similar with CP6B6_HELAM                |
| Px013958.1 | -1.5363 | 1.75E-141 | 8.12E-140 | Cytochrome P450 6k1; similar with CP6K1_BLAGE                |
| Px000790.1 | -1.5164 | 2.95E-29  | 4.57E-28  | Glutathione S-transferase 1; similar with GSTT1_MANSE        |
| Px006292.1 | -1.3115 | 1.53E-13  | 1.46E-12  | Ecdysteroid UDP-glucosyltransferase; similar with UDPE_NPVSL |
| Px005902.4 | -1.2680 | 1.53E-55  | 3.64E-54  | Cytochrome P450 6B6; similar with CP6B6_HELAM                |
| Px006106.1 | -1.2511 | 1.12E-164 | 5.90E-163 | Glutathione S-transferase 1; similar with GSTT1_MANSE        |
| Px001164.1 | -1.2470 | 1.19E-129 | 5.15E-128 | UDP-glucuronosyltransferase; similar with UGT3_PLEPL         |
| Px010678.1 | -1.1851 | 7.84E-05  | 3.39E-04  | Ecdysteroid UDP-glucosyltransferase; similar with UDPE_NPVSL |
| Px017253.1 | -1.1579 | 3.91E-33  | 6.66E-32  | Cytochrome P450 6B2; similar with CP6B2_HELAM                |
| Px001162.1 | -1.1273 | 1.39E-70  | 3.89E-69  | UDP-glucuronosyltransferase 2B1; similar with UD2B1_RAT      |
| Px013202.1 | -1.0671 | 1.48E-27  | 2.20E-26  | UDP-glucuronosyltransferase 2C1; similar with UD2C1_RABIT    |
| Px002723.1 | -1.0254 | 5.27E-169 | 2.82E-167 | Cytochrome P450 6B7; similar with CP6B7_HELAM                |

#### **Involved in linoleic acid metabolism**

|            |         |           |           |                                                    |
|------------|---------|-----------|-----------|----------------------------------------------------|
| Px000615.1 | 1.0950  | 2.04E-34  | 3.56E-33  | Retinol dehydrogenase 11; similar with RDH11_HUMAN |
| Px013145.1 | 1.0351  | 2.01E-231 | 1.45E-229 | Cytochrome P450 6B7; similar with CP6B7_HELAM      |
| Px014217.1 | -1.9896 | 7.35E-20  | 8.93E-19  | Cytochrome P450 6k1; similar with CP6K1_BLAGE      |
| Px005900.1 | -1.9164 | 8.05E-36  | 1.43E-34  | Cytochrome P450 6B2; similar with CP6B2_HELAM      |
| Px014216.1 | -1.5409 | 2.47E-29  | 3.84E-28  | Cytochrome P450 6B6; similar with CP6B6_HELAM      |
| Px013958.1 | -1.5363 | 1.75E-141 | 8.12E-140 | Cytochrome P450 6k1; similar with CP6K1_BLAGE      |
| Px005902.4 | -1.2680 | 1.53E-55  | 3.64E-54  | Cytochrome P450 6B6; similar with CP6B6_HELAM      |

Px017253.1 -1.1579 3.91E-33 6.66E-32 Cytochrome P450 6B2; similar with CP6B2\_HELAM  
 Px002723.1 -1.0254 5.27E-169 2.82E-167 Cytochrome P450 6B7; similar with CP6B7\_HELAM

#### **Involved in PPAR signaling pathway**

Px015380.1 -3.1169 1.43E-65 3.73E-64 Acyl-CoA Delta(11) desaturase; similar with ACO11\_TRINI  
 Px000524.1 -2.3593 6.86E-128 2.93E-126 Putative acyl-CoA-binding protein; similar with ACBP\_HYPDU  
 Px017039.1 -1.7904 0.00E+00 0.00E+00 Putative acyl-CoA-binding protein; similar with ACBP\_HYPDU  
 Px015467.1 -1.6138 4.30E-71 1.21E-69 Acyl-CoA Delta(11) desaturase; similar with ACO11\_TRINI  
 Px012916.1 -1.6002 1.24E-101 4.50E-100 Fatty acid-binding protein 1; similar with FABP1\_MANSE  
 Px008080.1 -1.5900 1.25E-08 8.47E-08 Lysosome membrane protein 2; similar with SCRB2\_HUMAN  
 Px001605.1 -1.5492 7.75E-228 5.50E-226 Putative acyl-CoA-binding protein; similar with ACBP\_HYPDU  
 Px002136.1 -1.3265 3.32E-66 8.72E-65 Acyl-CoA Delta(11) desaturase; similar with ACO11\_TRINI  
 Px013837.1 -1.2989 1.47E-04 6.04E-04 Carnitine O-palmitoyltransferase 1, muscle isoform  
 Px012677.1 -1.2571 7.62E-05 3.30E-04 Lipase member H-A; similar with LIPHA\_XENLA  
 Px004749.1 -1.2238 0.00E+00 0.00E+00 Lipoprotein lipase; similar with LIPL\_CAVPO  
 Px004753.1 -1.2160 2.50E-80 7.79E-79 Pancreatic lipase-related protein 2; similar with LIPR2\_MYOCO  
 Px016733.1 -1.1416 6.72E-08 4.25E-07 Acyl-CoA synthetase family member 3, mitochondrial  
 Px012455.1 -1.1171 7.44E-116 2.97E-114 NADP-dependent malic enzyme; similar with MAOX\_ANAPL

#### **Involved in phenylalanine metabolism**

Px016786.1 1.6161 5.93E-07 3.42E-06 Peroxidase; similar with PERO\_DROME  
 Px013191.1 1.1200 6.80E-09 4.69E-08 Aromatic-L-amino-acid decarboxylase; similar with DDC\_RAT  
 Px010831.1 -3.6714 6.10E-17 6.72E-16 Luciferin 4-monooxygenase; similar with LUCI\_PHOPE  
 Px016492.1 -3.3845 4.82E-55 1.14E-53 Luciferin 4-monooxygenase; similar with LUCI\_LUCCR  
 Px002199.1 -2.4921 5.49E-06 2.86E-05 4-coumarate--CoA ligase-like 5; similar with 4CLL5\_ARATH  
 Px011987.1 -2.3364 2.05E-16 2.21E-15 Amine oxidase [flavin-containing] B; similar with AOFB\_MOUSE  
 Px005763.1 -2.1051 3.50E-10 2.66E-09 Fatty-acid amide hydrolase 2; similar with FAAH2\_HUMAN  
 Px000359.2 -1.8693 2.82E-10 2.17E-09 Alpha-methyl dopa hypersensitive protein  
 Px009007.1 -1.6741 4.83E-05 2.16E-04 4-coumarate--CoA ligase-like 5; similar with 4CLL5\_ARATH  
 Px016655.1 -1.5797 5.94E-23 7.89E-22 Luciferin 4-monooxygenase; similar with LUCI\_LUCCR  
 Px016493.1 -1.5635 1.34E-30 2.15E-29 Luciferin 4-monooxygenase; similar with LUCI\_LUCMI  
 Px005799.4 -1.4526 2.86E-08 1.87E-07 Probable 4-coumarate--CoA ligase 3; similar with 4CL3\_ORYSJ  
 Px012806.2 -1.4027 4.47E-17 4.96E-16 Luciferin 4-monooxygenase; similar with LUCI\_LUCCR  
 Px006643.3 -1.0372 3.20E-28 4.84E-27 Luciferin 4-monooxygenase; similar with LUCI\_LUCMI  
 Px011202.1 -1.0066 3.64E-27 5.35E-26 Aromatic-L-amino-acid decarboxylase; similar with DDC\_MANSE

#### **Involved in retinol metabolism**

Px015080.1 1.5382 2.00E-23 2.70E-22 Ecdysteroid UDP-glucosyltransferase; similar with UDPE\_NPVMB  
 Px000615.1 1.0950 2.04E-34 3.56E-33 Retinol dehydrogenase 11; similar with RDH11\_HUMAN  
 Px013145.1 1.0351 2.01E-231 1.45E-229 Cytochrome P450 6B7; similar with CP6B7\_HELAM  
 Px015079.1 -3.1595 1.17E-07 7.28E-07 Ecdysteroid UDP-glucosyltransferase; similar with UDPE\_NPVSL  
 Px004854.1 -2.7504 3.14E-20 3.86E-19 Ecdysteroid UDP-glucosyltransferase; similar with UDPE\_NPVSL  
 Px014217.1 -1.9896 7.35E-20 8.93E-19 Cytochrome P450 6k1; similar with CP6K1\_BLAGE  
 Px000872.2 -1.9896 8.91E-10 6.55E-09 Ecdysteroid UDP-glucosyltransferase; similar with UDPE\_NPVSL  
 Px005900.1 -1.9164 8.05E-36 1.43E-34 Cytochrome P450 6B2; similar with CP6B2\_HELAM  
 Px015078.1 -1.6900 8.07E-07 4.58E-06 Ecdysteroid UDP-glucosyltransferase; similar with UDPE\_NPVSL  
 Px015569.1 -1.5545 1.85E-38 3.45E-37 3-oxoacyl-[acyl-carrier-protein] reductase FabG  
 Px014216.1 -1.5409 2.47E-29 3.84E-28 Cytochrome P450 6B6; similar with CP6B6\_HELAM  
 Px013958.1 -1.5363 1.75E-141 8.12E-140 Cytochrome P450 6k1; similar with CP6K1\_BLAGE  
 Px006292.1 -1.3115 1.53E-13 1.46E-12 Ecdysteroid UDP-glucosyltransferase; similar with UDPE\_NPVSL  
 Px005902.4 -1.2680 1.53E-55 3.64E-54 Cytochrome P450 6B6; similar with CP6B6\_HELAM



|            |         |           |           |                                                              |
|------------|---------|-----------|-----------|--------------------------------------------------------------|
| Px001164.1 | -1.2470 | 1.19E-129 | 5.15E-128 | UDP-glucuronosyltransferase; similar with UGT3_PLEPL         |
| Px010678.1 | -1.1851 | 7.84E-05  | 3.39E-04  | Ecdysteroid UDP-glucosyltransferase; similar with UDPE_NPVSL |
| Px017253.1 | -1.1579 | 3.91E-33  | 6.66E-32  | Cytochrome P450 6B2; similar with CP6B2_HELAM                |
| Px001162.1 | -1.1273 | 1.39E-70  | 3.89E-69  | UDP-glucuronosyltransferase 2B1; similar with UD2B1_RAT      |
| Px013202.1 | -1.0671 | 1.48E-27  | 2.20E-26  | UDP-glucuronosyltransferase 2C1; similar with UD2C1_RABIT    |
| Px002723.1 | -1.0254 | 5.27E-169 | 2.82E-167 | Cytochrome P450 6B7; similar with CP6B7_HELAM                |
| Px002029.1 | -1.0155 | 2.06E-48  | 4.48E-47  | Oxidoreductase ucpA; similar with UCPA_SALTY                 |

#### **Involved in tyrosine metabolism**

|            |         |           |           |                                                                 |
|------------|---------|-----------|-----------|-----------------------------------------------------------------|
| Px003101.1 | 2.0104  | 6.13E-07  | 3.53E-06  | Tyramine beta-hydroxylase; similar with TBH1_DROME              |
| Px007028.1 | 1.5228  | 0.00E+00  | 0.00E+00  | Arylphorin subunit alpha; similar with ARYA_MANSE               |
| Px012442.1 | 1.2592  | 3.07E-66  | 8.07E-65  | Peroxidase; similar with PERO_DROME                             |
| Px013191.1 | 1.1200  | 6.80E-09  | 4.69E-08  | Aromatic-L-amino-acid decarboxylase; similar with DDC_RAT       |
| Px011809.2 | -3.7266 | 1.89E-09  | 1.36E-08  | Nose resistant to fluoxetine protein 6; similar with NRF6_CAEEL |
| Px008866.1 | -2.7311 | 8.72E-18  | 9.93E-17  | Chorion peroxidase; similar with PERC_DROME                     |
| Px015388.1 | -2.4814 | 1.62E-07  | 9.92E-07  | Nose resistant to fluoxetine protein 6; similar with NRF6_CAEEL |
| Px006617.2 | -2.3588 | 1.63E-21  | 2.07E-20  | Chorion peroxidase; similar with PERC_DROME                     |
| Px011987.1 | -2.3364 | 2.05E-16  | 2.21E-15  | Amine oxidase [flavin-containing] B; similar with AOFB_MOUSE    |
| Px002274.1 | -2.2838 | 8.00E-307 | 7.21E-305 | Phenoloxidase subunit 2; similar with PRP2_BOMMO                |
| Px005418.1 | -2.1595 | 1.73E-05  | 8.37E-05  | Nose resistant to fluoxetine protein 6; similar with NRF6_CAEEL |
| Px005417.1 | -2.1099 | 1.03E-12  | 9.36E-12  | Nose resistant to fluoxetine protein 6; similar with NRF6_CAEEL |
| Px016277.1 | -1.9071 | 1.18E-04  | 4.95E-04  | Nose resistant to fluoxetine protein 6; similar with NRF6_CAEEL |
| Px000359.2 | -1.8693 | 2.82E-10  | 2.17E-09  | Alpha-methyl dopa hypersensitive protein                        |
| Px003528.3 | -1.6441 | 2.99E-08  | 1.95E-07  | Nose resistant to fluoxetine protein 6; similar with NRF6_CAEEL |
| Px011624.1 | -1.3721 | 7.16E-06  | 3.67E-05  | Nose resistant to fluoxetine protein 6; similar with NRF6_CAEEL |
| Px011202.1 | -1.0066 | 3.64E-27  | 5.35E-26  | Aromatic-L-amino-acid decarboxylase; similar with DDC_MANSE     |

#### **Involved in amino sugar and nucleotide sugar metabolism**

|            |         |           |           |                                                                    |
|------------|---------|-----------|-----------|--------------------------------------------------------------------|
| Px017244.1 | 1.8055  | 1.16E-71  | 3.29E-70  | N-acetylneuraminate lyase; similar with NPL_BOVIN                  |
| Px010131.1 | 1.1276  | 2.57E-34  | 4.46E-33  | Peritrophin 1; similar with Q86BV0_9NEOP                           |
| Px012229.1 | 1.0709  | 2.01E-04  | 8.06E-04  | Probable UDP-glucose 4-epimerase; similar with GALE_DROME          |
| Px008062.1 | -4.4584 | 1.02E-145 | 4.81E-144 | Endochitinase; similar with CHIT_MANSE                             |
| Px006322.1 | -3.4490 | 2.12E-05  | 1.01E-04  | Phosphoacetylglucosamine mutase; similar with AGM1_HUMAN           |
| Px017503.2 | -2.4325 | 4.27E-13  | 3.95E-12  | Probable chitinase 2; similar with CHIT2_DROME                     |
| Px003540.1 | -2.1707 | 6.03E-47  | 1.29E-45  | Hexokinase type 2; similar with HXK2_DROME                         |
| Px009279.1 | -1.8850 | 5.69E-71  | 1.60E-69  | Chitotriosidase-1; similar with CHIT1_HUMAN                        |
| Px016080.1 | -1.7601 | 1.66E-06  | 9.14E-06  | Glucosamine-6-phosphate isomerase; similar with GNPI_AEDAE         |
| Px016709.1 | -1.5845 | 1.40E-23  | 1.90E-22  | Glucosamine-6-phosphate isomerase; similar with GNPI_AEDAE         |
| Px004354.1 | -1.4211 | 4.63E-28  | 6.96E-27  | UDP-N-acetylhexosamine pyrophosphorylase-like protein 1            |
| Px005972.1 | -1.3849 | 6.30E-214 | 4.27E-212 | N-acetylneuraminate lyase; similar with NPL_RAT                    |
| Px015646.1 | -1.3432 | 2.76E-08  | 1.81E-07  | Chondroitin proteoglycan-2; similar with CPG2_CAEEL                |
| Px012913.1 | -1.3137 | 2.57E-98  | 9.06E-97  | Chitin synthase 6; similar with CHS6_USTMA                         |
| Px014300.1 | -1.2104 | 1.75E-16  | 1.89E-15  | Chitin deacetylase 4; similar with A8W489_TRICA                    |
| Px016079.1 | -1.1519 | 8.64E-06  | 4.36E-05  | Glucosamine-6-phosphate isomerase; similar with GNPI_DROPS         |
| Px006668.1 | -1.0988 | 1.89E-26  | 2.75E-25  | Phosphoglucomutase-2; similar with PGM2_HUMAN                      |
| Px012275.1 | -1.0310 | 2.02E-41  | 4.00E-40  | Glucosamine--fructose-6-phosphate aminotransferase [isomerizing] 1 |

#### **Involved in ascorbate and aldarate metabolism**

|            |         |          |          |                                                              |
|------------|---------|----------|----------|--------------------------------------------------------------|
| Px015080.1 | 1.5382  | 2.00E-23 | 2.70E-22 | Ecdysteroid UDP-glucosyltransferase; similar with UDPE_NPVMB |
| Px015079.1 | -3.1595 | 1.17E-07 | 7.28E-07 | Ecdysteroid UDP-glucosyltransferase; similar with UDPE_NPVSL |
| Px004854.1 | -2.7504 | 3.14E-20 | 3.86E-19 | Ecdysteroid UDP-glucosyltransferase; similar with UDPE_NPVSL |

|            |         |           |           |                                                              |
|------------|---------|-----------|-----------|--------------------------------------------------------------|
| Px000872.2 | -1.9896 | 8.91E-10  | 6.55E-09  | Ecdysteroid UDP-glucosyltransferase; similar with UDPE_NPVSL |
| Px015078.1 | -1.6900 | 8.07E-07  | 4.58E-06  | Ecdysteroid UDP-glucosyltransferase; similar with UDPE_NPVSL |
| Px000123.1 | -1.6773 | 1.05E-300 | 9.40E-299 | Putative aldehyde dehydrogenase family 7 member A1 homolog   |
| Px006292.1 | -1.3115 | 1.53E-13  | 1.46E-12  | Ecdysteroid UDP-glucosyltransferase; similar with UDPE_NPVSL |
| Px001164.1 | -1.2470 | 1.19E-129 | 5.15E-128 | UDP-glucuronosyltransferase; similar with UGT3_PLEPL         |
| Px010678.1 | -1.1851 | 7.84E-05  | 3.39E-04  | Ecdysteroid UDP-glucosyltransferase; similar with UDPE_NPVSL |
| Px010576.1 | -1.1539 | 2.05E-22  | 2.68E-21  | Inositol oxygenase; similar with MIOX_DANRE                  |
| Px001162.1 | -1.1273 | 1.39E-70  | 3.89E-69  | UDP-glucuronosyltransferase 2B1; similar with UD2B1_RAT      |
| Px013202.1 | -1.0671 | 1.48E-27  | 2.20E-26  | UDP-glucuronosyltransferase 2C1; similar with UD2C1_RABIT    |

#### **Involved in porphyrin and chlorophyll metabolism**

|            |         |           |           |                                                              |
|------------|---------|-----------|-----------|--------------------------------------------------------------|
| Px015080.1 | 1.5382  | 2.00E-23  | 2.70E-22  | Ecdysteroid UDP-glucosyltransferase; similar with UDPE_NPVMB |
| Px015079.1 | -3.1595 | 1.17E-07  | 7.28E-07  | Ecdysteroid UDP-glucosyltransferase; similar with UDPE_NPVSL |
| Px004854.1 | -2.7504 | 3.14E-20  | 3.86E-19  | Ecdysteroid UDP-glucosyltransferase; similar with UDPE_NPVSL |
| Px000872.2 | -1.9896 | 8.91E-10  | 6.55E-09  | Ecdysteroid UDP-glucosyltransferase; similar with UDPE_NPVSL |
| Px015078.1 | -1.6900 | 8.07E-07  | 4.58E-06  | Ecdysteroid UDP-glucosyltransferase; similar with UDPE_NPVSL |
| Px006292.1 | -1.3115 | 1.53E-13  | 1.46E-12  | Ecdysteroid UDP-glucosyltransferase; similar with UDPE_NPVSL |
| Px000825.3 | -1.3000 | 8.64E-37  | 1.57E-35  | Ferrochelatase, mitochondrial; similar with HEMH_DROME       |
| Px001164.1 | -1.2470 | 1.19E-129 | 5.15E-128 | UDP-glucuronosyltransferase; similar with UGT3_PLEPL         |
| Px010678.1 | -1.1851 | 7.84E-05  | 3.39E-04  | Ecdysteroid UDP-glucosyltransferase; similar with UDPE_NPVSL |
| Px012540.1 | -1.1556 | 5.07E-36  | 9.05E-35  | Heme oxygenase 1; similar with HMOX1_HUMAN                   |
| Px001162.1 | -1.1273 | 1.39E-70  | 3.89E-69  | UDP-glucuronosyltransferase 2B1; similar with UD2B1_RAT      |
| Px013202.1 | -1.0671 | 1.48E-27  | 2.20E-26  | UDP-glucuronosyltransferase 2C1; similar with UD2C1_RABIT    |

#### **Involved in glycerophospholipid metabolism**

|            |         |           |           |                                                                  |
|------------|---------|-----------|-----------|------------------------------------------------------------------|
| Px006262.1 | 1.0468  | 2.05E-19  | 2.46E-18  | Lipase 3; similar with LIP3_DROME                                |
| Px011809.2 | -3.7266 | 1.89E-09  | 1.36E-08  | Nose resistant to fluoxetine protein 6; similar with NRF6_CAEEL  |
| Px015388.1 | -2.4814 | 1.62E-07  | 9.92E-07  | Nose resistant to fluoxetine protein 6; similar with NRF6_CAEEL  |
| Px009691.1 | -2.4128 | 3.95E-17  | 4.40E-16  | Lipase 1; similar with LIP1_DROME                                |
| Px005418.1 | -2.1595 | 1.73E-05  | 8.37E-05  | Nose resistant to fluoxetine protein 6; similar with NRF6_CAEEL  |
| Px005417.1 | -2.1099 | 1.03E-12  | 9.36E-12  | Nose resistant to fluoxetine protein 6; similar with NRF6_CAEEL  |
| Px001913.1 | -1.9424 | 2.00E-107 | 7.50E-106 | Gastric triacylglycerol lipase; similar with LIPG_RAT            |
| Px016277.1 | -1.9071 | 1.18E-04  | 4.95E-04  | Nose resistant to fluoxetine protein 6; similar with NRF6_CAEEL  |
| Px012695.1 | -1.8366 | 2.01E-82  | 6.33E-81  | Lipase 1; similar with LIP1_DROME                                |
| Px005804.1 | -1.8351 | 1.46E-67  | 3.90E-66  | Lipase 1; similar with LIP1_DROME                                |
| Px011049.1 | -1.8032 | 1.05E-22  | 1.38E-21  | Acetylcholinesterase; similar with ACES_FELCA                    |
| Px003528.3 | -1.6441 | 2.99E-08  | 1.95E-07  | Nose resistant to fluoxetine protein 6; similar with NRF6_CAEEL  |
| Px005805.1 | -1.6287 | 1.50E-16  | 1.63E-15  | Lipase 1; similar with LIP1_DROME                                |
| Px011624.1 | -1.3721 | 7.16E-06  | 3.67E-05  | Nose resistant to fluoxetine protein 6; similar with NRF6_CAEEL  |
| Px017454.1 | -1.2946 | 1.98E-32  | 3.32E-31  | Liver carboxylesterase; similar with EST1_MESAU                  |
| Px016066.1 | -1.2734 | 1.11E-10  | 8.80E-10  | Lipase member M; similar with LIPM_MOUSE                         |
| Px011476.1 | -1.2320 | 1.40E-11  | 1.18E-10  | Lipase 3; similar with LIP3_DROME                                |
| Px004749.1 | -1.2238 | 0.00E+00  | 0.00E+00  | Lipoprotein lipase; similar with LIPL_CAVPO                      |
| Px004753.1 | -1.2160 | 2.50E-80  | 7.79E-79  | Pancreatic lipase-related protein 2; similar with LIPR2_MYOCO    |
| Px006345.1 | -1.1527 | 6.76E-112 | 2.60E-110 | Pancreatic lipase-related protein 2; similar with LIPR2_MYOCO    |
| Px009940.2 | -1.1454 | 2.86E-13  | 2.67E-12  | Acetylcholinesterase; similar with ACES_CULPI                    |
| Px011477.2 | -1.1127 | 3.00E-99  | 1.07E-97  | Lipase 1; similar with LIP1_DROME                                |
| Px011475.1 | -1.0965 | 2.90E-126 | 1.23E-124 | Lipase 3; similar with LIP3_DROME                                |
| Px011788.2 | -1.0547 | 1.82E-55  | 4.32E-54  | Pancreatic lipase-related protein 2; similar with LIPR2_BOVIN    |
| Px006720.1 | -1.0369 | 4.84E-05  | 2.17E-04  | Glycerol-3-phosphate acyltransferase 4; similar with GPAT4_PONAB |

### Involved in pyruvate metabolism

|            |         |           |           |                                                            |
|------------|---------|-----------|-----------|------------------------------------------------------------|
| Px008696.1 | -5.3497 | 5.87E-297 | 5.20E-295 | Osiris 9; similar with B6DXB0_BOMMO                        |
| Px014975.1 | -4.7969 | 6.48E-08  | 4.10E-07  | Alcohol dehydrogenase [NADP+] A; similar with A1A1A_DANRE  |
| Px008692.2 | -4.4151 | 0.00E+00  | 0.00E+00  | Osiris 9; similar with B6DXB0_BOMMO                        |
| Px008693.1 | -3.2626 | 2.45E-91  | 8.23E-90  | Osiris 9; similar with B6DXB0_BOMMO                        |
| Px008691.1 | -2.9941 | 0.00E+00  | 0.00E+00  | Osiris 9; similar with B6DXB0_BOMMO                        |
| Px000123.1 | -1.6773 | 1.05E-300 | 9.40E-299 | Putative aldehyde dehydrogenase family 7 member A1 homolog |
| Px000763.1 | -1.5860 | 3.76E-11  | 3.08E-10  | Acetyl-CoA carboxylase; similar with ACAC_CHICK            |
| Px015448.1 | -1.4118 | 1.12E-05  | 5.59E-05  | Acetyl-CoA carboxylase; similar with ACAC_CHICK            |
| Px015449.1 | -1.3608 | 1.13E-08  | 7.71E-08  | Acetyl-CoA carboxylase 1; similar with ACACA_SHEEP         |
| Px000765.5 | -1.2565 | 1.62E-21  | 2.05E-20  | Acetyl-CoA carboxylase; similar with ACAC_CHICK            |
| Px012800.1 | -1.2320 | 1.03E-26  | 1.49E-25  | Pyruvate carboxylase 1; similar with PYC1_CAEEL            |
| Px010260.3 | -1.2101 | 1.05E-14  | 1.06E-13  | Alcohol dehydrogenase [NADP+] A; similar with A1A1A_DANRE  |
| Px000764.1 | -1.2030 | 2.00E-49  | 4.42E-48  | Acetyl-CoA carboxylase; similar with ACAC_CHICK            |
| Px012455.1 | -1.1171 | 7.44E-116 | 2.97E-114 | NADP-dependent malic enzyme; similar with MAOX_ANAPL       |
| Px016731.1 | -1.0617 | 5.94E-15  | 6.04E-14  | Acyl-CoA synthetase family member 3, mitochondrial         |
| Px014429.1 | -1.0489 | 1.94E-24  | 2.71E-23  | Acetyl-CoA carboxylase; similar with ACAC_CHICK            |

### Involved in galactose metabolism

|            |         |           |           |                                                           |
|------------|---------|-----------|-----------|-----------------------------------------------------------|
| Px007446.1 | 1.3698  | 1.05E-25  | 1.50E-24  | Alpha-N-acetylgalactosaminidase; similar with NAGAB_CHICK |
| Px002634.1 | 1.3665  | 2.50E-05  | 1.18E-04  | Beta-1,4-N-acetylgalactosaminyltransferase bre-4          |
| Px012229.1 | 1.0709  | 2.01E-04  | 8.06E-04  | Probable UDP-glucose 4-epimerase; similar with GALE_DROME |
| Px006315.2 | 1.0426  | 1.25E-21  | 1.59E-20  | Lysosomal alpha-glucosidase; similar with LYAG_MOUSE      |
| Px014975.1 | -4.7969 | 6.48E-08  | 4.10E-07  | Alcohol dehydrogenase [NADP+] A; similar with A1A1A_DANRE |
| Px003540.1 | -2.1707 | 6.03E-47  | 1.29E-45  | Hexokinase type 2; similar with HXK2_DROME                |
| Px003486.1 | -1.9201 | 1.08E-287 | 9.35E-286 | Probable maltase H; similar with MAL2_DROME               |
| Px013169.1 | -1.5746 | 8.44E-13  | 7.70E-12  | Lactase-phlorizin hydrolase; similar with LPH_HUMAN       |
| Px003205.1 | -1.4688 | 1.09E-07  | 6.74E-07  | Envelope fusion protein; similar with ENV_NPVL            |
| Px013730.1 | -1.3842 | 3.22E-26  | 4.64E-25  | Myrosinase 1; similar with MYRO1_BREBR                    |
| Px005277.3 | -1.3778 | 0.00E+00  | 0.00E+00  | Lactase-phlorizin hydrolase; similar with LPH_HUMAN       |
| Px010260.3 | -1.2101 | 1.05E-14  | 1.06E-13  | Alcohol dehydrogenase [NADP+] A; similar with A1A1A_DANRE |
| Px002047.1 | -1.1417 | 3.74E-76  | 1.12E-74  | Uncharacterized family 31 glucosidase KIAA1161            |
| Px002046.1 | -1.1174 | 7.12E-244 | 5.40E-242 | Uncharacterized family 31 glucosidase KIAA1161            |
| Px006668.1 | -1.0988 | 1.89E-26  | 2.75E-25  | Phosphoglucomutase-2; similar with PGM2_HUMAN             |
| Px001933.1 | -1.0839 | 3.76E-08  | 2.44E-07  | Myrosinase 1; similar with MYRO1_BREBR                    |
| Px008848.1 | -1.0387 | 1.30E-48  | 2.85E-47  | Myrosinase 1; similar with MYRO1_BREBR                    |

### Involved in alpha-Linolenic acid metabolism

|            |         |           |           |                                                               |
|------------|---------|-----------|-----------|---------------------------------------------------------------|
| Px006262.1 | 1.0468  | 2.05E-19  | 2.46E-18  | Lipase 3; similar with LIP3_DROME                             |
| Px009691.1 | -2.4128 | 3.95E-17  | 4.40E-16  | Lipase 1; similar with LIP1_DROME                             |
| Px001913.1 | -1.9424 | 2.00E-107 | 7.50E-106 | Gastric triacylglycerol lipase; similar with LIPG_RAT         |
| Px012695.1 | -1.8366 | 2.01E-82  | 6.33E-81  | Lipase 1; similar with LIP1_DROME                             |
| Px005804.1 | -1.8351 | 1.46E-67  | 3.90E-66  | Lipase 1; similar with LIP1_DROME                             |
| Px005805.1 | -1.6287 | 1.50E-16  | 1.63E-15  | Lipase 1; similar with LIP1_DROME                             |
| Px016066.1 | -1.2734 | 1.11E-10  | 8.80E-10  | Lipase member M; similar with LIPM_MOUSE                      |
| Px011476.1 | -1.2320 | 1.40E-11  | 1.18E-10  | Lipase 3; similar with LIP3_DROME                             |
| Px004749.1 | -1.2238 | 0.00E+00  | 0.00E+00  | Lipoprotein lipase; similar with LIPL_CAVPO                   |
| Px004753.1 | -1.2160 | 2.50E-80  | 7.79E-79  | Pancreatic lipase-related protein 2; similar with LIPR2_MYOCO |
| Px006345.1 | -1.1527 | 6.76E-112 | 2.60E-110 | Pancreatic lipase-related protein 2; similar with LIPR2_MYOCO |
| Px011477.2 | -1.1127 | 3.00E-99  | 1.07E-97  | Lipase 1; similar with LIP1_DROME                             |
| Px011475.1 | -1.0965 | 2.90E-126 | 1.23E-124 | Lipase 3; similar with LIP3_DROME                             |

Px011788.2 -1.0547 1.82E-55 4.32E-54 Pancreatic lipase-related protein 2; similar with LIPR2\_BOVIN

---

**Table G.** Statistically enriched KEGG pathway for specific expressed genes.

| <b>Pathway ID</b>                                            | <b>Description</b>                                    | <b>Total genes</b> | <b>Specific genes</b> | <b>p-value</b> |
|--------------------------------------------------------------|-------------------------------------------------------|--------------------|-----------------------|----------------|
| <b>Specific expressed in infected <i>P. xylostella</i></b>   |                                                       |                    |                       |                |
| ko04745                                                      | Phototransduction - fly                               | 66                 | 9                     | 1.81E-03       |
| ko04080                                                      | Neuroactive ligand-receptor interaction               | 316                | 25                    | 2.10E-03       |
| ko04725                                                      | Cholinergic synapse                                   | 79                 | 9                     | 6.21E-03       |
| ko04723                                                      | Retrograde endocannabinoid signaling                  | 80                 | 9                     | 6.74E-03       |
| ko04730                                                      | Long-term depression                                  | 69                 | 8                     | 8.70E-03       |
| ko04540                                                      | Gap junction                                          | 71                 | 8                     | 1.03E-02       |
| ko04972                                                      | Pancreatic secretion                                  | 341                | 24                    | 1.08E-02       |
| ko04916                                                      | Melanogenesis                                         | 119                | 11                    | 1.24E-02       |
| ko04130                                                      | SNARE interactions in vesicular transport             | 25                 | 4                     | 2.02E-02       |
| ko04610                                                      | Complement and coagulation cascades                   | 57                 | 6                     | 3.35E-02       |
| ko04970                                                      | Salivary secretion                                    | 176                | 13                    | 3.76E-02       |
| ko04724                                                      | Glutamatergic synapse                                 | 107                | 9                     | 3.85E-02       |
| ko04962                                                      | Vasopressin-regulated water reabsorption              | 124                | 10                    | 3.86E-02       |
| ko04914                                                      | Progesterone-mediated oocyte maturation               | 126                | 10                    | 4.24E-02       |
| <b>Specific expressed in uninfected <i>P. xylostella</i></b> |                                                       |                    |                       |                |
| ko04640                                                      | Hematopoietic cell lineage                            | 54                 | 4                     | 1.14E-02       |
| ko00563                                                      | Glycosylphosphatidylinositol(GPI)-anchor biosynthesis | 30                 | 3                     | 1.25E-02       |
| ko00020                                                      | Citrate cycle (TCA cycle)                             | 62                 | 4                     | 1.83E-02       |
| ko04144                                                      | Endocytosis                                           | 237                | 8                     | 4.01E-02       |
| ko03015                                                      | mRNA surveillance pathway                             | 329                | 10                    | 4.27E-02       |
| ko04916                                                      | Melanogenesis                                         | 119                | 5                     | 4.49E-02       |
| ko04726                                                      | Serotonergic synapse                                  | 84                 | 4                     | 4.81E-02       |
| ko04666                                                      | Fc gamma R-mediated phagocytosis                      | 162                | 6                     | 4.92E-02       |

**Table H.** A list of DEGs involved in the detoxification of *P. xylostella* 24, 36 and 48 hpt<sub>I</sub> versus hpt<sub>C</sub>.

| Gene ID    | log <sub>2</sub> R                       | log <sub>2</sub> R                       | Log <sub>2</sub> R                       | Annotation                                   |
|------------|------------------------------------------|------------------------------------------|------------------------------------------|----------------------------------------------|
|            | 24 hpt <sub>I</sub> /24 hpt <sub>C</sub> | 36 hpt <sub>I</sub> /36 hpt <sub>C</sub> | 48 hpt <sub>I</sub> /48 hpt <sub>C</sub> |                                              |
| Px005901.1 |                                          | 1.0179                                   |                                          | cytochrome P450                              |
| Px008537.1 |                                          | 1.3212                                   |                                          | cytochrome P450                              |
| Px013454.1 | -1.0045                                  | 2.0425                                   |                                          | cytochrome P450                              |
| Px004867.1 |                                          |                                          |                                          | cytochrome P450                              |
| Px013145.1 |                                          |                                          |                                          | cytochrome P450                              |
| Px007339.1 |                                          |                                          |                                          | cytochrome P450                              |
| Px009113.1 |                                          |                                          |                                          | Glutathione S-transferase (GST)              |
| Px010078.1 |                                          | 1.1245                                   |                                          | GST                                          |
| Px006481.1 |                                          |                                          |                                          | GST                                          |
| Px006106.1 |                                          | 1.3067                                   |                                          | GST                                          |
| Px000991.1 | 1.3435                                   | 3.2679                                   | 1.7324                                   | Carboxylesterase (COE)                       |
| Px006430.1 |                                          | 2.4038                                   |                                          | COE                                          |
| Px009940.1 |                                          | 3.4221                                   | 1.4584                                   | COE                                          |
| Px002736.1 |                                          | 2.4868                                   |                                          | COE                                          |
| Px002735.1 |                                          | 2.6010                                   |                                          | COE                                          |
| Px011049.1 |                                          | 2.5090                                   | 1.5512                                   | COE                                          |
| Px011683.1 |                                          | 2.9306                                   | 2.4698                                   | COE                                          |
| Px011756.1 |                                          | 2.5480                                   |                                          | COE                                          |
| Px000089.1 |                                          | 2.6887                                   |                                          | COE                                          |
| Px005687.1 |                                          | 2.2408                                   | 1.1173                                   | COE                                          |
| Px000515.1 |                                          | 1.9774                                   | 1.3647                                   | COE                                          |
| Px011757.1 | -1.1422                                  | 1.0401                                   |                                          | (Antennal) COE                               |
| Px011755.1 |                                          | 1.7284                                   |                                          | (Antennal) COE                               |
| Px001164.1 |                                          | 1.1390                                   |                                          | UDP-glucosyltransferase (UGT)                |
| Px000872.1 |                                          | 1.8756                                   |                                          | UGT                                          |
| Px015078.1 | -1.2320                                  |                                          |                                          | UGT                                          |
| Px013203.1 | 1.3285                                   | 1.4517                                   |                                          | UGT                                          |
| Px004854.1 | -1.2931                                  | 2.1011                                   |                                          | UGT                                          |
| Px014884.1 |                                          |                                          |                                          | Aldehyde oxidase (AOX)                       |
| Px001209.1 |                                          |                                          |                                          | Catalase (CAT)                               |
| Px005628.1 |                                          |                                          | -2.5380                                  | CAT                                          |
| Px012442.1 |                                          |                                          |                                          | Peroxidase (POD)                             |
| Px008505.1 | -1.1688                                  | 1.7699                                   | 1.0866                                   | Glucose oxidase (GOX)                        |
| Px004125.1 |                                          | 2.4130                                   |                                          | Sulfatase-modifying factor (SUMF)            |
| Px018104.1 |                                          | 3.5281                                   | 1.2702                                   | Glucosinolate sulphatase (GSS)               |
| Px018105.1 |                                          | 3.5788                                   | 2.0303                                   | GSS                                          |
| Px007687.1 |                                          |                                          | 1.7310                                   | GSS                                          |
| Px006776.1 | -1.3711                                  | 2.0492                                   |                                          | Sodium-independent sulfate anion transporter |
| Px004317.1 |                                          | 2.0159                                   |                                          | Sodium-dependent phosphate transporter       |
| Px004211.1 |                                          | 1.0195                                   |                                          | Sodium-dependent phosphate transporter       |
| Px013910.1 |                                          |                                          |                                          | Organic anion transporter                    |
| Px008906.1 |                                          | 1.1025                                   |                                          | Organic cation transporter                   |

**Table I.** A list of DEGs enriched in the GO terms of *P. xylostella* at 24 hpt<sub>I</sub> versus 24 hpt<sub>C</sub>

| Gene ID           | log <sub>2</sub> R | P-value   | FDR       | Annotation                                                           |
|-------------------|--------------------|-----------|-----------|----------------------------------------------------------------------|
| <b>GO:0005218</b> |                    |           |           |                                                                      |
| Px010453.1        | -1.0959            | 3.64E-05  | 1.29E-04  | Ryanodine receptor 44F; similar with RY44_DROME;                     |
| Px013237.1        | -1.4617            | 5.34E-169 | 2.91E-167 | Ryanodine receptor 44F; similar with RY44_DROME;                     |
| Px007169.1        | -1.6039            | 1.11E-142 | 5.36E-141 | Ryanodine receptor 44F; similar with RY44_DROME;                     |
| Px006829.9        | -2.1487            | 1.74E-16  | 1.63E-15  | Ryanodine receptor 44F; similar with RY44_DROME;                     |
| Px015884.1        | -2.2297            | 3.22E-28  | 4.73E-27  | Ryanodine receptor 44F; similar with RY44_DROME;                     |
| Px004335.2        | -2.8349            | 1.43E-27  | 2.05E-26  | Ryanodine receptor 44F; similar with RY44_DROME;                     |
| <b>GO:0005219</b> |                    |           |           |                                                                      |
| Px010453.1        | -1.0959            | 3.64E-05  | 1.29E-04  | Ryanodine receptor 44F; similar with RY44_DROME;                     |
| Px013237.1        | -1.4617            | 5.34E-169 | 2.91E-167 | Ryanodine receptor 44F; similar with RY44_DROME;                     |
| Px007169.1        | -1.6039            | 1.11E-142 | 5.36E-141 | Ryanodine receptor 44F; similar with RY44_DROME;                     |
| Px006829.9        | -2.1487            | 1.74E-16  | 1.63E-15  | Ryanodine receptor 44F; similar with RY44_DROME;                     |
| Px015884.1        | -2.2297            | 3.22E-28  | 4.73E-27  | Ryanodine receptor 44F; similar with RY44_DROME;                     |
| Px004335.2        | -2.8349            | 1.43E-27  | 2.05E-26  | Ryanodine receptor 44F; similar with RY44_DROME;                     |
| <b>GO:0015085</b> |                    |           |           |                                                                      |
| Px010453.1        | -1.0959            | 3.64E-05  | 1.29E-04  | Ryanodine receptor 44F;                                              |
| Px014591.1        | -1.0980            | 5.54E-10  | 3.30E-09  | Inositol 1,4,5-trisphosphate receptor;                               |
| Px016332.1        | -1.2199            | 0.00E+00  | 0.00E+00  | Calcium-transporting ATPase sarcoplasmic/endoplasmic reticulum type; |
| Px004866.1        | -1.2725            | 1.52E-09  | 8.72E-09  | Inositol 1,4,5-trisphosphate receptor;                               |
| Px003569.1        | -1.3529            | 1.56E-28  | 2.30E-27  | Voltage-dependent calcium channel type D subunit alpha-1;            |
| Px016654.1        | -1.4183            | 1.81E-80  | 5.97E-79  | Ryanodine receptor 44F; similar with RY44_DROME;                     |
| Px003970.1        | -1.4540            | 0.00E+00  | 0.00E+00  | Plasma membrane calcium-transporting ATPase 3;                       |
| Px013237.1        | -1.4617            | 5.34E-169 | 2.91E-167 | Ryanodine receptor 44F; similar with RY44_DROME;                     |
| Px008442.1        | -1.4977            | 2.29E-09  | 1.29E-08  | Sodium leak channel non-selective protein;                           |
| Px007169.1        | -1.6039            | 1.11E-142 | 5.36E-141 | Ryanodine receptor 44F;                                              |
| Px008343.1        | -1.6794            | 3.24E-35  | 5.68E-34  | Voltage-dependent L-type calcium channel subunit beta-2;             |
| Px003969.1        | -1.8898            | 4.45E-12  | 3.12E-11  | Plasma membrane calcium-transporting ATPase 3;                       |
| Px012737.1        | -2.0831            | 3.17E-19  | 3.44E-18  | Voltage-dependent L-type calcium channel subunit beta-2;             |
| Px006829.9        | -2.1487            | 1.74E-16  | 1.63E-15  | Ryanodine receptor 44F; similar with RY44_DROME;                     |
| Px015884.1        | -2.2297            | 3.22E-28  | 4.73E-27  | Ryanodine receptor 44F; similar with RY44_DROME;                     |
| Px015604.1        | -2.3122            | 1.59E-04  | 5.06E-04  | Calcium channel flower; similar with FLOWR_DROWI;                    |
| Px001039.2        | -2.3186            | 5.11E-12  | 3.57E-11  | Voltage-dependent calcium channel type D subunit alpha-1;            |
| Px004335.2        | -2.8349            | 1.43E-27  | 2.05E-26  | Ryanodine receptor 44F; similar with RY44_DROME;                     |
| <b>GO:0005262</b> |                    |           |           |                                                                      |
| Px010453.1        | -1.0959            | 3.64E-05  | 1.29E-04  | Ryanodine receptor 44F; similar with RY44_DROME;                     |
| Px014591.1        | -1.0980            | 5.54E-10  | 3.30E-09  | Inositol 1,4,5-trisphosphate receptor;                               |
| Px004866.1        | -1.2725            | 1.52E-09  | 8.72E-09  | Inositol 1,4,5-trisphosphate receptor;                               |
| Px003569.1        | -1.3529            | 1.56E-28  | 2.30E-27  | Voltage-dependent calcium channel type D subunit alpha-1;            |
| Px016654.1        | -1.4183            | 1.81E-80  | 5.97E-79  | Ryanodine receptor 44F; similar with RY44_DROME;                     |
| Px013237.1        | -1.4617            | 5.34E-169 | 2.91E-167 | Ryanodine receptor 44F; similar with RY44_DROME;                     |
| Px008442.1        | -1.4977            | 2.29E-09  | 1.29E-08  | Sodium leak channel non-selective protein;                           |
| Px007169.1        | -1.6039            | 1.11E-142 | 5.36E-141 | Ryanodine receptor 44F; similar with RY44_DROME;                     |
| Px008343.1        | -1.6794            | 3.24E-35  | 5.68E-34  | Voltage-dependent L-type calcium channel subunit beta-2;             |
| Px012737.1        | -2.0831            | 3.17E-19  | 3.44E-18  | Voltage-dependent L-type calcium channel subunit beta-2;             |
| Px006829.9        | -2.1487            | 1.74E-16  | 1.63E-15  | Ryanodine receptor 44F; similar with RY44_DROME;                     |
| Px015884.1        | -2.2297            | 3.22E-28  | 4.73E-27  | Ryanodine receptor 44F; similar with RY44_DROME;                     |
| Px015604.1        | -2.3122            | 1.59E-04  | 5.06E-04  | Calcium channel flower; similar with FLOWR_DROWI;                    |

Px001039.2 -2.3186 5.11E-12 3.57E-11 Voltage-dependent calcium channel type D subunit alpha-1;  
Px004335.2 -2.8349 1.43E-27 2.05E-26 Ryanodine receptor 44F; similar with RY44 DROME;

---



**Table J.** A list of DEGs enriched in the GO terms of *P. xylostella* at 36 hpt<sub>I</sub> versus 36 hpt<sub>C</sub>

| Gene ID           | log <sub>2</sub> R | P-value   | FDR       | Annotation                                               |
|-------------------|--------------------|-----------|-----------|----------------------------------------------------------|
| <b>GO:0008233</b> |                    |           |           |                                                          |
| Px015905.1        | 13.4712            | 1.77E-71  | 2.63E-70  | Transmembrane protease serine 6;                         |
| Px003000.1        | 12.5364            | 2.28E-42  | 2.43E-41  | Transmembrane protease serine 6;                         |
| Px007620.1        | 10.3950            | 8.15E-10  | 3.63E-09  | Trypsin CFT-1; similar with TRYP_CHOFU;                  |
| Px006453.1        | 10.3391            | 8.15E-10  | 3.63E-09  | Transmembrane protease serine 6;                         |
| Px006069.1        | 10.0136            | 2.26E-06  | 7.79E-06  | Trypsin CFT-1; similar with TRYP_CHOFU;                  |
| Px017505.1        | 9.7974             | 1.71E-04  | 4.81E-04  | Plasma kallikrein; similar with KLKB1_HUMAN;             |
| Px007670.1        | 6.2472             | 5.75E-63  | 7.92E-62  | Proclotting enzyme; similar with PCE_TACTR;              |
| Px016055.1        | 4.5497             | 4.52E-56  | 5.70E-55  | Trypsin, alkaline C; similar with TRYC_MANSE;            |
| Px000995.2        | 4.3915             | 0.00E+00  | 0.00E+00  | Carboxypeptidase A4; similar with CBPA4_HUMAN;           |
| Px005241.1        | 4.3794             | 1.43E-53  | 1.74E-52  | Trypsin CFT-1; similar with TRYP_CHOFU;                  |
| Px015276.1        | 4.0315             | 9.55E-65  | 1.33E-63  | Trypsin CFT-1; similar with TRYP_CHOFU;                  |
| Px005243.1        | 3.9876             | 0.00E+00  | 0.00E+00  | Trypsin, alkaline A; similar with TRYA_MANSE;            |
| Px015277.1        | 3.9698             | 7.98E-158 | 2.09E-156 | Trypsin CFT-1; similar with TRYP_CHOFU;                  |
| Px010313.2        | 3.7896             | 2.43E-106 | 4.78E-105 | Serine proteinase stubble; similar with STUB_DROME;      |
| Px006623.1        | 3.7777             | 1.10E-26  | 9.00E-26  | Transmembrane protease serine 9;                         |
| Px013732.1        | 3.7553             | 4.20E-15  | 2.42E-14  | Proteasome subunit alpha type-7-1;                       |
| Px012813.1        | 3.6622             | 2.98E-06  | 1.02E-05  | Serine proteinase stubble; similar with STUB_DROME;      |
| Px000992.1        | 3.6006             | 0.00E+00  | 0.00E+00  | Carboxypeptidase A1; similar with CBPA1_BOVIN;           |
| Px007617.1        | 3.5958             | 0.00E+00  | 0.00E+00  | Trypsin CFT-1; similar with TRYP_CHOFU;                  |
| Px005765.1        | 3.4325             | 1.33E-62  | 1.82E-61  | Vitellin-degrading protease; similar with VDP_BOMMO;     |
| Px016056.1        | 3.4297             | 0.00E+00  | 0.00E+00  | Trypsin, alkaline A; similar with TRYA_MANSE;            |
| Px008538.1        | 3.4202             | 3.15E-138 | 7.39E-137 | Trypsin, alkaline B; similar with TRYB_MANSE;            |
| Px005657.1        | 3.4122             | 1.95E-23  | 1.46E-22  | Proclotting enzyme; similar with PCE_TACTR;              |
| Px012048.1        | 3.3901             | 4.29E-64  | 5.96E-63  | Chymotrypsin BI; similar with CTRB1_LITVA;               |
| Px007621.1        | 3.3847             | 6.61E-21  | 4.65E-20  | Trypsin CFT-1; similar with TRYP_CHOFU;                  |
| Px008277.1        | 3.3443             | 1.09E-141 | 2.62E-140 | Membrane alanyl aminopeptidase;                          |
| Px010386.1        | 3.1714             | 0.00E+00  | 0.00E+00  | Trypsin CFT-1; similar with TRYP_CHOFU;                  |
| Px015928.1        | 3.1647             | 2.57E-04  | 7.05E-04  | Carboxypeptidase B; similar with CBPB_ASTFL;             |
| Px007619.2        | 3.0951             | 0.00E+00  | 0.00E+00  | Trypsin, alkaline A; similar with TRYA_MANSE;            |
| Px007676.1        | 3.0603             | 2.33E-107 | 4.62E-106 | Chymotrypsin-C; similar with CTRC_HUMAN;                 |
| Px002861.1        | 3.0431             | 0.00E+00  | 0.00E+00  | Trypsin, alkaline C; similar with TRYC_MANSE;            |
| Px007903.1        | 2.9954             | 0.00E+00  | 0.00E+00  | Collagenase; similar with COGS_HYPLI;                    |
| Px015049.1        | 2.9693             | 5.52E-35  | 5.22E-34  | Venom dipeptidyl peptidase 4; similar with VDDP4_VESVU;  |
| Px003479.1        | 2.9314             | 1.50E-17  | 9.44E-17  | Protein rhomboid; similar with RHOM_DROME;               |
| Px015280.1        | 2.9138             | 7.05E-10  | 3.15E-09  | Trypsin CFT-1; similar with TRYP_CHOFU;                  |
| Px000994.1        | 2.8631             | 0.00E+00  | 0.00E+00  | Zinc carboxypeptidase A 1; similar with CBPA1_DROPS;     |
| Px002993.1        | 2.7717             | 0.00E+00  | 0.00E+00  | Zinc metalloproteinase nas-4; similar with NAS4_CAEEL;   |
| Px005373.1        | 2.7565             | 1.52E-39  | 1.56E-38  | Carboxypeptidase B; similar with CBPB_ASTFL;             |
| Px007618.1        | 2.7222             | 1.13E-272 | 4.41E-271 | Trypsin CFT-1; similar with TRYP_CHOFU;                  |
| Px011887.1        | 2.7196             | 0.00E+00  | 0.00E+00  | Trypsin, alkaline C; similar with TRYC_MANSE;            |
| Px009286.1        | 2.7141             | 0.00E+00  | 0.00E+00  | Trypsin, alkaline C; similar with TRYC_MANSE;            |
| Px009784.1        | 2.6561             | 0.00E+00  | 0.00E+00  | Ribosome-binding protein 1; similar with RRBPI_HUMAN;    |
| Px016567.1        | 2.6458             | 1.14E-175 | 3.25E-174 | Matrix metalloproteinase-14; similar with MMP14_RAT;     |
| Px018074.1        | 2.6056             | 3.91E-24  | 2.97E-23  | Chymotrypsin-like elastase family member 2A;             |
| Px009757.1        | 2.5486             | 2.19E-10  | 1.01E-09  | Proteasome subunit beta type-2; similar with PSB2_MOUSE; |
| Px007674.2        | 2.5239             | 0.00E+00  | 0.00E+00  | Collagenase; similar with COGS_HYPLI;                    |
| Px007675.1        | 2.5233             | 0.00E+00  | 0.00E+00  | Collagenase; similar with COGS_HYPLI;                    |
| Px007677.1        | 2.4787             | 0.00E+00  | 0.00E+00  | Trypsin-7; similar with TRY7_ANOGA;                      |
| Px002588.1        | 2.4151             | 4.81E-14  | 2.66E-13  | Trypsin, alkaline C; similar with TRYC_MANSE;            |
| Px010489.1        | 2.4085             | 6.89E-66  | 9.73E-65  | Trypsin, alkaline C; similar with TRYC_MANSE;            |

|            |         |           |           |                                                                    |
|------------|---------|-----------|-----------|--------------------------------------------------------------------|
| Px003467.1 | 2.3876  | 2.10E-18  | 1.36E-17  | Matrix metalloproteinase-14; similar with MMP14_RABIT;             |
| Px009395.1 | 2.3871  | 1.03E-17  | 6.47E-17  | Proclotting enzyme; similar with PCE_TACTR;                        |
| Px007616.1 | 2.3746  | 1.09E-158 | 2.87E-157 | Trypsin CFT-1; similar with TRYP_CHOFU;                            |
| Px001708.1 | 2.3708  | 0.00E+00  | 0.00E+00  | Aminopeptidase N; similar with AMPN_PLUXY;                         |
| Px005242.1 | 2.3668  | 2.59E-19  | 1.73E-18  | Trypsin CFT-1; similar with TRYP_CHOFU;                            |
| Px015275.1 | 2.3286  | 0.00E+00  | 0.00E+00  | Trypsin CFT-1; similar with TRYP_CHOFU;                            |
| Px001705.1 | 2.3213  | 0.00E+00  | 0.00E+00  | Membrane alanyl aminopeptidase;                                    |
| Px006622.3 | 2.2728  | 9.45E-20  | 6.46E-19  | Ovochymase-1; similar with OVCH1_HUMAN;                            |
| Px001990.2 | 2.2289  | 2.92E-104 | 5.69E-103 | Carboxypeptidase B; similar with CBPB_ASTFL;                       |
| Px001633.1 | 2.2212  | 3.10E-80  | 5.00E-79  | Angiotensin-converting enzyme;                                     |
| Px011796.5 | 2.0740  | 1.05E-51  | 1.26E-50  | Putative aminopeptidase W07G4.4;                                   |
| Px001833.1 | 2.0603  | 0.00E+00  | 0.00E+00  | Serine protease easter; similar with EAST_DROME;                   |
| Px002632.1 | 2.0480  | 2.47E-165 | 6.70E-164 | Xaa-Pro dipeptidase; similar with PEPD_HUMAN;                      |
| Px016844.1 | 2.0366  | 3.06E-05  | 9.40E-05  | Proteasome subunit beta type-1; similar with PSB1_RAT;             |
| Px011097.1 | 1.9460  | 2.65E-10  | 1.22E-09  | Serine proteinase stubble; similar with STUB_DROME;                |
| Px003754.1 | 1.9228  | 1.67E-147 | 4.13E-146 | Membrane alanyl aminopeptidase;                                    |
| Px006956.1 | 1.8788  | 1.02E-112 | 2.08E-111 | Xaa-Pro dipeptidase; similar with PEPD_HUMAN;                      |
| Px008406.1 | 1.8639  | 2.77E-08  | 1.10E-07  | Serine proteinase stubble; similar with STUB_DROME;                |
| Px012329.1 | 1.7693  | 5.39E-84  | 8.95E-83  | Serine protease persephone; similar with PSH_DROME;                |
| Px015778.1 | 1.7676  | 5.49E-08  | 2.14E-07  | Sentrin-specific protease 8; similar with SENP8_HUMAN;             |
| Px012643.1 | 1.7650  | 5.67E-95  | 1.02E-93  | Angiotensin-converting enzyme; similar with ACE_MOUSE;             |
| Px003753.1 | 1.7587  | 0.00E+00  | 0.00E+00  | Membrane alanyl aminopeptidase;                                    |
| Px000402.2 | 1.6821  | 5.77E-83  | 9.50E-82  | Serine protease persephone; similar with PSH_DROME;                |
| Px006502.1 | 1.6424  | 1.34E-55  | 1.68E-54  | Calpain-B; similar with CANB_DROME;                                |
| Px009087.2 | 1.6281  | 1.83E-240 | 6.53E-239 | Coagulation factor XII; similar with FA12_CAVPO;                   |
| Px008070.1 | 1.6216  | 3.59E-04  | 9.63E-04  | Peroxisomal leader peptide-processing protease;                    |
| Px009715.1 | 1.5988  | 8.85E-16  | 5.24E-15  | Mitochondrial inner membrane protease subunit 1;                   |
| Px011489.1 | 1.4705  | 1.48E-69  | 2.16E-68  | Gamma-glutamyl hydrolase A; similar with GGHA_DICDI;               |
| Px014831.2 | 1.4467  | 0.00E+00  | 0.00E+00  | Serine proteinase stubble; similar with STUB_DROME;                |
| Px005726.1 | 1.4124  | 1.92E-12  | 9.85E-12  | Xaa-Pro aminopeptidase 1; similar with XPP1_HUMAN;                 |
| Px005747.1 | 1.4025  | 6.57E-16  | 3.92E-15  | Proteasome subunit alpha type-5;                                   |
| Px009568.1 | 1.3992  | 1.23E-04  | 3.53E-04  | Trypsin, alkaline C; similar with TRYC_MANSE;                      |
| Px016171.2 | 1.3471  | 1.79E-54  | 2.21E-53  | Prolyl endopeptidase; similar with PPCE_MOUSE;                     |
| Px003361.1 | 1.3252  | 8.90E-19  | 5.86E-18  | Cysteine protease ATG4D; similar with ATG4D_MOUSE;                 |
| Px008337.1 | 1.2761  | 1.16E-111 | 2.35E-110 | Leishmanolysin-like peptidase; similar with LMLN_DROME;            |
| Px002715.1 | 1.2673  | 4.39E-154 | 1.12E-152 | Cathepsin L; similar with CATL_DROME;                              |
| Px010436.1 | 1.1181  | 3.98E-92  | 7.03E-91  | Venom serine carboxypeptidase; similar with VCP_APIME;             |
| Px011311.1 | 1.1044  | 8.81E-09  | 3.65E-08  | Proteasome subunit beta type-1;                                    |
| Px008596.1 | 1.0870  | 1.05E-14  | 5.94E-14  | Transmembrane protease serine 9;                                   |
| Px016983.3 | 1.0379  | 6.64E-09  | 2.78E-08  | Serine proteinase stubble; similar with STUB_DROME;                |
| Px004984.1 | 1.0033  | 2.67E-04  | 7.30E-04  | Peroxisomal leader peptide-processing protease;                    |
| Px001502.1 | -1.0334 | 1.38E-18  | 9.02E-18  | Ubiquitin carboxyl-terminal hydrolase 2;                           |
| Px013179.1 | -1.1092 | 3.73E-04  | 9.98E-04  | Insulin-degrading enzyme; similar with IDE_HUMAN;                  |
| Px004104.1 | -1.1191 | 3.46E-06  | 1.17E-05  | GH18371; similar with B4JEW4_DROGR;                                |
| Px000827.1 | -1.1679 | 2.17E-07  | 8.16E-07  | Ubiquitin carboxyl-terminal hydrolase 2;                           |
| Px009314.2 | -1.3802 | 1.36E-12  | 7.02E-12  | A disintegrin and metalloproteinase with thrombospondin motifs 16; |
| Px004087.1 | -1.3985 | 1.15E-50  | 1.37E-49  | Signal peptidase complex subunit 2;                                |
| Px000572.1 | -1.4791 | 1.12E-04  | 3.23E-04  | Phosphatidylinositol-binding clathrin assembly protein LAP;        |
| Px002987.1 | -1.5181 | 0.00E+00  | 0.00E+00  | Methionine aminopeptidase 2; similar with AMPM2_BOVIN;             |
| Px016787.1 | -1.6669 | 1.01E-06  | 3.59E-06  | Insulin-degrading enzyme; similar with IDE_HUMAN;                  |
| Px010814.1 | -3.0382 | 1.61E-05  | 5.11E-05  | ADAMTS-like protein 3; similar with ATL3_HUMAN;                    |

**GO:0016787**

|            |         |          |          |                                  |
|------------|---------|----------|----------|----------------------------------|
| Px015905.1 | 13.4712 | 1.77E-71 | 2.63E-70 | Transmembrane protease serine 6; |
|------------|---------|----------|----------|----------------------------------|

|            |         |           |           |                                                       |
|------------|---------|-----------|-----------|-------------------------------------------------------|
| Px003000.1 | 12.5364 | 2.28E-42  | 2.43E-41  | Transmembrane protease serine 6;                      |
| Px015074.1 | 11.6135 | 2.99E-08  | 1.19E-07  | Dynein light chain Tctex-type 1;                      |
| Px009803.1 | 10.8775 | 1.46E-08  | 5.93E-08  | Probable chitinase 2; similar with CHIT2_DROME;       |
| Px012560.1 | 10.5968 | 1.26E-07  | 4.83E-07  | Lipase member H-B; similar with LIPHB_XENLA;          |
| Px007620.1 | 10.3950 | 8.15E-10  | 3.63E-09  | Trypsin CFT-1; similar with TRYP_CHOFU;               |
| Px001433.1 | 10.3916 | 1.08E-11  | 5.35E-11  | Probable chitinase 2; similar with CHIT2_DROME;       |
| Px006453.1 | 10.3391 | 8.15E-10  | 3.63E-09  | Transmembrane protease serine 6;                      |
| Px006069.1 | 10.0136 | 2.26E-06  | 7.79E-06  | Trypsin CFT-1; similar with TRYP_CHOFU;               |
| Px017505.1 | 9.7974  | 1.71E-04  | 4.81E-04  | Plasma kallikrein; similar with KLKB1_HUMAN;          |
| Px014880.1 | 8.9447  | 4.64E-06  | 1.55E-05  | ATP synthase subunit beta, mitochondrial;             |
| Px013802.1 | 8.5527  | 1.46E-08  | 5.93E-08  | Sodium/potassium-transporting ATPase subunit alpha-2; |
| Px016580.1 | 8.3897  | 3.51E-04  | 9.44E-04  | T-complex protein 1 subunit epsilon;                  |
| Px015148.1 | 8.0644  | 1.96E-05  | 6.16E-05  | ATP synthase subunit beta, mitochondrial;             |
| Px015265.1 | 6.8160  | 1.67E-09  | 7.31E-09  | Dynein beta chain, ciliary; similar with DYHC_TRIGR;  |
| Px008062.1 | 6.7684  | 1.28E-182 | 3.76E-181 | Endochitinase; similar with CHIT_MANSE;               |
| Px001804.1 | 6.5119  | 2.83E-51  | 3.39E-50  | Trypsin, alkaline B; similar with TRYB_MANSE;         |
| Px007670.1 | 6.2472  | 5.75E-63  | 7.92E-62  | Proclotting enzyme; similar with PCE_TACTR;           |
| Px015893.1 | 4.9841  | 6.70E-09  | 2.81E-08  | Putative inner dynein arm light chain, axonemal;      |
| Px014882.1 | 4.8506  | 4.25E-162 | 1.13E-160 | Trypsin, alkaline C; similar with TRYC_MANSE;         |
| Px008276.1 | 4.6077  | 0.00E+00  | 0.00E+00  | Membrane alanyl aminopeptidase;                       |
| Px016055.1 | 4.5497  | 4.52E-56  | 5.70E-55  | Trypsin, alkaline C; similar with TRYC_MANSE;         |
| Px002864.1 | 4.5298  | 1.55E-103 | 3.01E-102 | Trypsin, alkaline B; similar with TRYB_MANSE;         |
| Px000995.2 | 4.3915  | 0.00E+00  | 0.00E+00  | Carboxypeptidase A4; similar with CBPA4_HUMAN;        |
| Px005241.1 | 4.3794  | 1.43E-53  | 1.74E-52  | Trypsin CFT-1; similar with TRYP_CHOFU;               |
| Px000084.1 | 4.3183  | 5.99E-51  | 7.13E-50  | Cysteine sulfinic acid decarboxylase;;                |
| Px000291.1 | 4.0996  | 2.97E-16  | 1.79E-15  | Myrosinase 1; similar with MYRO1_BREBR;               |
| Px002586.1 | 4.0373  | 5.30E-58  | 6.84E-57  | Trypsin CFT-1; similar with TRYP_CHOFU;               |
| Px015276.1 | 4.0315  | 9.55E-65  | 1.33E-63  | Trypsin CFT-1; similar with TRYP_CHOFU;               |
| Px005243.1 | 3.9876  | 0.00E+00  | 0.00E+00  | Trypsin, alkaline A; similar with TRYA_MANSE;         |
| Px015277.1 | 3.9698  | 7.98E-158 | 2.09E-156 | Trypsin CFT-1; similar with TRYP_CHOFU;               |
| Px004490.1 | 3.9557  | 0.00E+00  | 0.00E+00  | Adenosine deaminase CECR1;                            |
| Px006518.1 | 3.8846  | 1.12E-13  | 6.06E-13  | Probable protein phosphatase 2C T23F11.1;             |
| Px009202.1 | 3.8846  | 3.51E-04  | 9.44E-04  | Myosin heavy chain, non-muscle;                       |
| Px016657.1 | 3.8498  | 2.94E-10  | 1.35E-09  | Katanin p60 ATPase-containing subunit;                |
| Px010313.2 | 3.7896  | 2.43E-106 | 4.78E-105 | Serine proteinase stubble; similar with STUB_DROME;   |
| Px006623.1 | 3.7777  | 1.10E-26  | 9.00E-26  | Transmembrane protease serine 9;                      |
| Px013732.1 | 3.7553  | 4.20E-15  | 2.42E-14  | Proteasome subunit alpha type-7-1;                    |
| Px012813.1 | 3.6622  | 2.98E-06  | 1.02E-05  | Serine proteinase stubble; similar with STUB_DROME;   |
| Px014201.1 | 3.6008  | 7.33E-11  | 3.48E-10  | Sodium/potassium-transporting ATPase subunit alpha-2; |
| Px000992.1 | 3.6006  | 0.00E+00  | 0.00E+00  | Carboxypeptidase A1; similar with CBPA1_BOVIN;        |
| Px007617.1 | 3.5958  | 0.00E+00  | 0.00E+00  | Trypsin CFT-1; similar with TRYP_CHOFU;               |
| Px002116.1 | 3.5798  | 2.74E-08  | 1.10E-07  | ATP-binding cassette sub-family G member 1;           |
| Px008495.2 | 3.5537  | 1.86E-106 | 3.67E-105 | Peptidoglycan-recognition protein LB;                 |
| Px005765.1 | 3.4325  | 1.33E-62  | 1.82E-61  | Vitellin-degrading protease; similar with VDP_BOMMO;  |
| Px016056.1 | 3.4297  | 0.00E+00  | 0.00E+00  | Trypsin, alkaline A; similar with TRYA_MANSE;         |
| Px008538.1 | 3.4202  | 3.15E-138 | 7.39E-137 | Trypsin, alkaline B; similar with TRYB_MANSE;         |
| Px005657.1 | 3.4122  | 1.95E-23  | 1.46E-22  | Proclotting enzyme; similar with PCE_TACTR;           |
| Px001762.1 | 3.3992  | 3.26E-11  | 1.58E-10  | Sucrose-6-phosphate hydrolase;                        |
| Px012048.1 | 3.3901  | 4.29E-64  | 5.96E-63  | Chymotrypsin BI; similar with CTB1_LITVA;             |
| Px007621.1 | 3.3847  | 6.61E-21  | 4.65E-20  | Trypsin CFT-1; similar with TRYP_CHOFU;               |
| Px017503.2 | 3.3503  | 2.24E-18  | 1.45E-17  | Probable chitinase 2; similar with CHIT2_DROME;       |
| Px008277.1 | 3.3443  | 1.09E-141 | 2.62E-140 | Membrane alanyl aminopeptidase;                       |
| Px007120.2 | 3.3099  | 1.50E-19  | 1.02E-18  | ATP synthase subunit beta, mitochondrial;             |
| Px000993.1 | 3.2755  | 0.00E+00  | 0.00E+00  | Carboxypeptidase A2; similar with CBPA2_RAT;          |

|            |        |           |           |                                                                           |
|------------|--------|-----------|-----------|---------------------------------------------------------------------------|
| Px000991.6 | 3.2679 | 0.00E+00  | 0.00E+00  | Carboxypeptidase O; similar with CBPO_BOVIN;                              |
| Px015279.1 | 3.2472 | 1.79E-18  | 1.17E-17  | Trypsin, alkaline A; similar with TRYA_MANSE;                             |
| Px012568.1 | 3.2398 | 0.00E+00  | 0.00E+00  | Trypsin CFT-1; similar with TRYP_CHOFU;                                   |
| Px010386.1 | 3.1714 | 0.00E+00  | 0.00E+00  | Trypsin CFT-1; similar with TRYP_CHOFU;                                   |
| Px013274.1 | 3.1667 | 4.10E-69  | 5.97E-68  | Ubiquitin carboxyl-terminal hydrolase 7;                                  |
| Px015741.1 | 3.1647 | 2.57E-04  | 7.05E-04  | Endoribonuclease Dicer; similar with DICER_BOVIN;                         |
| Px015928.1 | 3.1647 | 2.57E-04  | 7.05E-04  | Carboxypeptidase B; similar with CBPB_ASTFL;                              |
| Px006580.1 | 3.1217 | 2.62E-07  | 9.75E-07  | Mitochondrial cardiolipin hydrolase;                                      |
| Px007619.2 | 3.0951 | 0.00E+00  | 0.00E+00  | Trypsin, alkaline A; similar with TRYA_MANSE;                             |
| Px005671.1 | 3.0773 | 4.83E-07  | 1.76E-06  | Pyrazinamidase/nicotinamidase;                                            |
| Px007676.1 | 3.0603 | 2.33E-107 | 4.62E-106 | Chymotrypsin-C; similar with CTCR_HUMAN;                                  |
| Px002861.1 | 3.0431 | 0.00E+00  | 0.00E+00  | Trypsin, alkaline C; similar with TRYC_MANSE;                             |
| Px009639.1 | 3.0376 | 0.00E+00  | 0.00E+00  | Trypsin CFT-1; similar with TRYP_CHOFU;                                   |
| Px007903.1 | 2.9954 | 0.00E+00  | 0.00E+00  | Collagenase; similar with COGS_HYPLI;                                     |
| Px005244.1 | 2.9796 | 7.91E-29  | 6.74E-28  | Trypsin CFT-1; similar with TRYP_CHOFU;                                   |
| Px015049.1 | 2.9693 | 5.52E-35  | 5.22E-34  | Venom dipeptidyl peptidase 4;                                             |
| Px005724.3 | 2.9382 | 3.59E-86  | 6.08E-85  | Xaa-Pro aminopeptidase 1; similar with XPP1_MOUSE;                        |
| Px008281.1 | 2.9352 | 2.46E-11  | 1.20E-10  | Kinesin-like protein KIF12; similar with KIF12_MOUSE;                     |
| Px003479.1 | 2.9314 | 1.50E-17  | 9.44E-17  | Protein rhomboid; similar with RHOM_DROME;                                |
| Px011683.2 | 2.9306 | 0.00E+00  | 0.00E+00  | Venom carboxylesterase-6; similar with EST6_APIME;                        |
| Px002784.1 | 2.9253 | 1.81E-07  | 6.86E-07  | Multidrug resistance-associated protein 7;                                |
| Px015280.1 | 2.9138 | 7.05E-10  | 3.15E-09  | Trypsin CFT-1; similar with TRYP_CHOFU;                                   |
| Px009987.1 | 2.8978 | 1.47E-38  | 1.48E-37  | Caspase-1; similar with CASP1_DROME;                                      |
| Px000616.1 | 2.8942 | 0.00E+00  | 0.00E+00  | Tubulin alpha chain; similar with TBA_TORMA;                              |
| Px000994.1 | 2.8631 | 0.00E+00  | 0.00E+00  | Zinc carboxypeptidase A 1; similar with CBPA1_DROPS;                      |
| Px009638.1 | 2.8523 | 0.00E+00  | 0.00E+00  | Trypsin, alkaline B; similar with TRYB_MANSE;                             |
| Px002141.1 | 2.8381 | 6.72E-42  | 7.09E-41  | Probable phospholipid-transporting ATPase IF;                             |
| Px012332.1 | 2.8227 | 3.03E-20  | 2.09E-19  | ATP synthase subunit beta, mitochondrial;                                 |
| Px011608.1 | 2.8142 | 1.67E-04  | 4.72E-04  | Fanconi-associated nuclease 1;                                            |
| Px002587.1 | 2.7903 | 0.00E+00  | 0.00E+00  | Trypsin CFT-1; similar with TRYP_CHOFU;                                   |
| Px002993.1 | 2.7717 | 0.00E+00  | 0.00E+00  | Zinc metalloproteinase nas-4; similar with NAS4_CAEEL;                    |
| Px005373.1 | 2.7565 | 1.52E-39  | 1.56E-38  | Carboxypeptidase B; similar with CBPB_ASTFL;                              |
| Px002047.1 | 2.7527 | 1.74E-261 | 6.60E-260 | Uncharacterized family 31 glucosidase KIAA1161;                           |
| Px016263.3 | 2.7402 | 1.48E-13  | 7.96E-13  | ATP-binding cassette sub-family G member 4;                               |
| Px000107.1 | 2.7335 | 0.00E+00  | 0.00E+00  | Trypsin, alkaline C; similar with TRYC_MANSE;                             |
| Px007618.1 | 2.7222 | 1.13E-272 | 4.41E-271 | Trypsin CFT-1; similar with TRYP_CHOFU;                                   |
| Px011887.1 | 2.7196 | 0.00E+00  | 0.00E+00  | Trypsin, alkaline C; similar with TRYC_MANSE;                             |
| Px009286.1 | 2.7141 | 0.00E+00  | 0.00E+00  | Trypsin, alkaline C; similar with TRYC_MANSE;                             |
| Px013288.1 | 2.7099 | 5.83E-272 | 2.27E-270 | Tubulin beta chain; similar with TBB_PARLI;                               |
| Px013968.1 | 2.6816 | 1.66E-71  | 2.47E-70  | Dual specificity protein phosphatase 19;                                  |
| Px009784.1 | 2.6561 | 0.00E+00  | 0.00E+00  | Ribosome-binding protein 1;                                               |
| Px000119.2 | 2.6517 | 0.00E+00  | 0.00E+00  | Inositol hexakisphosphate and diphosphoinositol-pentakisphosphate kinase; |
| Px016567.1 | 2.6458 | 1.14E-175 | 3.25E-174 | Matrix metalloproteinase-14; similar with MMP14_RAT;                      |
| Px002441.1 | 2.6127 | 4.36E-75  | 6.75E-74  | Trypsin, alkaline B; similar with TRYB_MANSE;                             |
| Px018074.1 | 2.6056 | 3.91E-24  | 2.97E-23  | Chymotrypsin-like elastase family member 2A;                              |
| Px000395.1 | 2.6001 | 0.00E+00  | 0.00E+00  | Alpha-amylase 4N; similar with AM4N_DROAN;                                |
| Px006728.1 | 2.5849 | 0.00E+00  | 0.00E+00  | Sucrose-6-phosphate hydrolase;                                            |
| Px006600.1 | 2.5735 | 7.58E-284 | 3.05E-282 | Acetylcholinesterase; similar with ACES_BOVIN;                            |
| Px011359.1 | 2.5541 | 3.85E-26  | 3.07E-25  | Dynein light chain roadblock-type 1;                                      |
| Px009757.1 | 2.5486 | 2.19E-10  | 1.01E-09  | Proteasome subunit beta type-2;                                           |
| Px005866.1 | 2.5435 | 0.00E+00  | 0.00E+00  | Zinc carboxypeptidase A 1;                                                |
| Px001977.1 | 2.5367 | 1.82E-04  | 5.08E-04  | Tyrosine-protein phosphatase 99A;                                         |
| Px007674.2 | 2.5239 | 0.00E+00  | 0.00E+00  | Collagenase; similar with COGS_HYPLI;                                     |
| Px007675.1 | 2.5233 | 0.00E+00  | 0.00E+00  | Collagenase; similar with COGS_HYPLI;                                     |

|            |        |           |           |                                                                         |
|------------|--------|-----------|-----------|-------------------------------------------------------------------------|
| Px004489.1 | 2.5013 | 7.47E-48  | 8.61E-47  | Adenosine deaminase CECR1;                                              |
| Px009766.1 | 2.4923 | 6.69E-06  | 2.20E-05  | Lysosomal Pro-X carboxypeptidase;                                       |
| Px002046.1 | 2.4907 | 0.00E+00  | 0.00E+00  | Uncharacterized family 31 glucosidase KIAA1161;                         |
| Px007677.1 | 2.4787 | 0.00E+00  | 0.00E+00  | Trypsin-7; similar with TRY7_ANOGA;                                     |
| Px012582.1 | 2.4724 | 2.13E-127 | 4.68E-126 | Collagenase; similar with COGS_HYPLI;                                   |
| Px004163.1 | 2.4696 | 2.57E-07  | 9.61E-07  | Ubiquitin carboxyl-terminal hydrolase 8;                                |
| Px010022.2 | 2.4600 | 2.32E-49  | 2.71E-48  | Cytosolic beta-glucosidase; similar with GBA3_CAVPO;                    |
| Px008848.1 | 2.4433 | 2.05E-168 | 5.68E-167 | Myrosinase 1; similar with MYRO1_BREBR;                                 |
| Px016058.1 | 2.4185 | 0.00E+00  | 0.00E+00  | Trypsin, alkaline C; similar with TRYC_MANSE;                           |
| Px007814.1 | 2.4181 | 0.00E+00  | 0.00E+00  | Multiple inositol polyphosphate phosphatase 1;                          |
| Px002588.1 | 2.4151 | 4.81E-14  | 2.66E-13  | Trypsin, alkaline C; similar with TRYC_MANSE;                           |
| Px010489.1 | 2.4085 | 6.89E-66  | 9.73E-65  | Trypsin, alkaline C; similar with TRYC_MANSE;                           |
| Px002416.1 | 2.4045 | 6.85E-76  | 1.07E-74  | Probable multidrug resistance-associated protein lethA;                 |
| Px009287.1 | 2.4027 | 1.27E-279 | 5.09E-278 | Trypsin CFT-1; similar with TRYP_CHOFU;                                 |
| Px006226.1 | 2.3992 | 1.06E-04  | 3.06E-04  | Calpain-C; similar with CANC_DROME;                                     |
| Px003467.1 | 2.3876 | 2.10E-18  | 1.36E-17  | Matrix metalloproteinase-14; similar with MMP14_RABIT;                  |
| Px009395.1 | 2.3871 | 1.03E-17  | 6.47E-17  | Proclotting enzyme; similar with PCE_TACTR;                             |
| Px003761.3 | 2.3858 | 4.84E-205 | 1.52E-203 | Endoribonuclease Dicer; similar with DICER_BOVIN;                       |
| Px007616.1 | 2.3746 | 1.09E-158 | 2.87E-157 | Trypsin CFT-1; similar with TRYP_CHOFU;                                 |
| Px002209.3 | 2.3727 | 4.22E-16  | 2.54E-15  | Dynein heavy chain 1, axonemal;                                         |
| Px001708.1 | 2.3708 | 0.00E+00  | 0.00E+00  | Aminopeptidase N; similar with AMPN_PLUXY;                              |
| Px005242.1 | 2.3668 | 2.59E-19  | 1.73E-18  | Trypsin CFT-1; similar with TRYP_CHOFU;                                 |
| Px002589.1 | 2.3435 | 3.45E-96  | 6.29E-95  | Trypsin, alkaline A; similar with TRYA_MANSE;                           |
| Px004218.1 | 2.3409 | 0.00E+00  | 0.00E+00  | Sucrose-6-phosphate hydrolase;                                          |
| Px015275.1 | 2.3286 | 0.00E+00  | 0.00E+00  | Trypsin CFT-1; similar with TRYP_CHOFU;                                 |
| Px001761.1 | 2.3229 | 1.01E-228 | 3.51E-227 | Sucrose-6-phosphate hydrolase;                                          |
| Px001705.1 | 2.3213 | 0.00E+00  | 0.00E+00  | Membrane alanyl aminopeptidase;                                         |
| Px005876.1 | 2.3107 | 8.18E-70  | 1.20E-68  | Patatin-like phospholipase domain-containing protein 2;                 |
| Px006622.3 | 2.2728 | 9.45E-20  | 6.46E-19  | Ovochymase-1; similar with OVCH1_HUMAN;                                 |
| Px001275.1 | 2.2595 | 6.17E-09  | 2.59E-08  | Probable multidrug resistance-associated protein lethal;                |
| Px009567.1 | 2.2552 | 3.00E-104 | 5.83E-103 | Trypsin, alkaline B; similar with TRYB_MANSE;                           |
| Px002576.1 | 2.2413 | 7.31E-79  | 1.17E-77  | Leucine-rich repeats and immunoglobulin-like domains protein 2;         |
| Px001990.2 | 2.2289 | 2.92E-104 | 5.69E-103 | Carboxypeptidase B; similar with CBPB_ASTFL;                            |
| Px009566.1 | 2.2251 | 1.29E-259 | 4.84E-258 | Trypsin, alkaline C; similar with TRYC_MANSE;                           |
| Px006265.1 | 2.2241 | 3.46E-05  | 1.06E-04  | Alpha-tocopherol transfer protein-like;                                 |
| Px001633.1 | 2.2212 | 3.10E-80  | 5.00E-79  | Angiotensin-converting enzyme; similar with ACE_PANTR;                  |
| Px007927.1 | 2.2154 | 4.79E-60  | 6.34E-59  | V-type proton ATPase subunit G;                                         |
| Px008913.1 | 2.1926 | 0.00E+00  | 0.00E+00  | Acetylcholinesterase; similar with ACES_CULPI;                          |
| Px001878.1 | 2.1781 | 2.23E-21  | 1.59E-20  | Lysosomal Pro-X carboxypeptidase;                                       |
| Px004946.1 | 2.1753 | 3.57E-18  | 2.30E-17  | ATP synthase subunit gamma, mitochondrial;                              |
| Px011886.1 | 2.1750 | 1.89E-125 | 4.14E-124 | Trypsin CFT-1; similar with TRYP_CHOFU;                                 |
| Px009347.1 | 2.1107 | 3.40E-32  | 3.07E-31  | Protein shuttle craft; similar with STC_DROME;                          |
| Px011501.1 | 2.0881 | 7.26E-17  | 4.47E-16  | ATP synthase subunit beta, mitochondrial;                               |
| Px011796.5 | 2.0740 | 1.05E-51  | 1.26E-50  | Putative aminopeptidase W07G4.4;                                        |
| Px009703.1 | 2.0631 | 0.00E+00  | 0.00E+00  | Beta-1,3-glucan-binding protein;                                        |
| Px016550.6 | 2.0608 | 2.43E-11  | 1.19E-10  | Probable L-asparaginase GA20639;                                        |
| Px001833.1 | 2.0603 | 0.00E+00  | 0.00E+00  | Serine protease easter; similar with EAST_DROME;                        |
| Px002382.1 | 2.0597 | 1.62E-130 | 3.62E-129 | Myosin-VIIa; similar with MYO7A_AEDAE;                                  |
| Px002632.1 | 2.0480 | 2.47E-165 | 6.70E-164 | Xaa-Pro dipeptidase; similar with PEPD_HUMAN;                           |
| Px004167.1 | 2.0469 | 1.15E-06  | 4.06E-06  | Plasma kallikrein; similar with KLKB1_MOUSE;                            |
| Px016844.1 | 2.0366 | 3.06E-05  | 9.40E-05  | Proteasome subunit beta type-1; similar with PSB1_RAT;                  |
| Px012569.1 | 2.0285 | 0.00E+00  | 0.00E+00  | Trypsin, alkaline C; similar with TRYC_MANSE;                           |
| Px004726.1 | 2.0010 | 1.03E-29  | 8.97E-29  | Alpha, alpha-trehalose-phosphate synthase [UDP-forming] 56 kDa subunit; |
| Px005079.1 | 1.9962 | 0.00E+00  | 0.00E+00  | Lactase-phlorizin hydrolase; similar with LPH_HUMAN;                    |

|            |        |           |           |                                                                      |
|------------|--------|-----------|-----------|----------------------------------------------------------------------|
| Px011097.1 | 1.9460 | 2.65E-10  | 1.22E-09  | Serine proteinase stubble;                                           |
| Px001111.1 | 1.9440 | 1.54E-14  | 8.66E-14  | Probable multidrug resistance-associated protein lethal;             |
| Px000116.1 | 1.9398 | 7.72E-10  | 3.45E-09  | Protein phosphatase 1E; similar with PPM1E_RAT;                      |
| Px002889.1 | 1.9297 | 3.44E-08  | 1.36E-07  | Dynein beta chain, ciliary; similar with DYHC_TRIGR;                 |
| Px003754.1 | 1.9228 | 1.67E-147 | 4.13E-146 | Membrane alanyl aminopeptidase;                                      |
| Px017171.1 | 1.9108 | 8.59E-16  | 5.10E-15  | Putative inositol monophosphatase 3;                                 |
| Px012937.2 | 1.8846 | 1.37E-05  | 4.37E-05  | Phospholipase D1; similar with PLD1_HUMAN;                           |
| Px006956.1 | 1.8788 | 1.02E-112 | 2.08E-111 | Xaa-Pro dipeptidase; similar with PEPD_HUMAN;                        |
| Px000394.1 | 1.8666 | 1.72E-210 | 5.53E-209 | Alpha-amylase 4N; similar with AM4N_DROAN;                           |
| Px002866.1 | 1.8658 | 5.28E-09  | 2.23E-08  | Trypsin, alkaline A; similar with TRYA_MANSE;                        |
| Px008406.1 | 1.8639 | 2.77E-08  | 1.10E-07  | Serine proteinase stubble; similar with STUB_DROME;                  |
| Px004577.1 | 1.8549 | 4.19E-18  | 2.69E-17  | Phosphotriesterase-related protein;                                  |
| Px007992.2 | 1.8540 | 1.63E-24  | 1.25E-23  | Multidrug resistance protein homolog 49;                             |
| Px013665.3 | 1.8475 | 2.46E-37  | 2.43E-36  | Collagenase; similar with COGS_HYPLI;                                |
| Px004611.1 | 1.8428 | 1.21E-04  | 3.46E-04  | Katanin p60 ATPase-containing subunit A-like 1;                      |
| Px016270.1 | 1.7997 | 7.53E-11  | 3.57E-10  | Histone deacetylase 3; similar with HDAC3_TETNG;                     |
| Px015779.1 | 1.7984 | 0.00E+00  | 0.00E+00  | Fatty-acid amide hydrolase 2;                                        |
| Px013655.1 | 1.7878 | 3.45E-08  | 1.37E-07  | Chitotriosidase-1; similar with CHIT1_HUMAN;                         |
| Px011697.1 | 1.7841 | 4.24E-28  | 3.56E-27  | Bifunctional methylenetetrahydrofolate dehydrogenase/cyclohydrolase; |
| Px012329.1 | 1.7693 | 5.39E-84  | 8.95E-83  | Serine protease persephone; similar with PSH_DROME;                  |
| Px015778.1 | 1.7676 | 5.49E-08  | 2.14E-07  | Sentrin-specific protease 8; similar with SENP8_HUMAN;               |
| Px012643.1 | 1.7650 | 5.67E-95  | 1.02E-93  | Angiotensin-converting enzyme; similar with ACE_MOUSE;               |
| Px003753.1 | 1.7587 | 0.00E+00  | 0.00E+00  | Membrane alanyl aminopeptidase;                                      |
| Px004725.1 | 1.7553 | 9.24E-06  | 3.01E-05  | ATP-binding cassette sub-family G member 1;                          |
| Px008938.1 | 1.7508 | 1.35E-30  | 1.19E-29  | Carboxypeptidase D; similar with CBPD_DROME;                         |
| Px014955.1 | 1.7471 | 5.65E-27  | 4.64E-26  | ABC transporter G family member 23;                                  |
| Px011231.1 | 1.7453 | 1.76E-27  | 1.46E-26  | Protein unc-50 homolog; similar with UNC50_DROME;                    |
| Px010017.1 | 1.7418 | 0.00E+00  | 0.00E+00  | Carboxypeptidase B; similar with CBPB_ASTFL;                         |
| Px004446.3 | 1.6970 | 2.01E-45  | 2.23E-44  | Copper-transporting ATPase 2;                                        |
| Px005403.1 | 1.6902 | 6.87E-06  | 2.26E-05  | Probable multidrug resistance-associated protein lethal;             |
| Px000402.2 | 1.6821 | 5.77E-83  | 9.50E-82  | Serine protease persephone; similar with PSH_DROME;                  |
| Px007305.1 | 1.6562 | 9.37E-42  | 9.88E-41  | C-1-tetrahydrofolate synthase, cytoplasmic;                          |
| Px003712.1 | 1.6490 | 1.05E-19  | 7.17E-19  | Acetylcholinesterase; similar with ACES_CULPI;                       |
| Px006502.1 | 1.6424 | 1.34E-55  | 1.68E-54  | Calpain-B; similar with CANB_DROME;                                  |
| Px005342.1 | 1.6408 | 3.80E-156 | 9.82E-155 | Collagenase; similar with COGS_HYPLI;                                |
| Px009087.2 | 1.6281 | 1.83E-240 | 6.53E-239 | Coagulation factor XII; similar with FA12_CAVPO;                     |
| Px008070.1 | 1.6216 | 3.59E-04  | 9.63E-04  | Peroxisomal leader peptide-processing protease;                      |
| Px004065.1 | 1.6192 | 1.53E-09  | 6.71E-09  | Mannosyl-oligosaccharide alpha-1,2-mannosidase isoform A;            |
| Px007904.1 | 1.6124 | 0.00E+00  | 0.00E+00  | Collagenase; similar with COGS_HYPLI;                                |
| Px002015.1 | 1.6107 | 7.78E-06  | 2.55E-05  | AGAP008123-PA; similar with Q7Q401_ANOGA;                            |
| Px007111.3 | 1.6050 | 2.44E-116 | 5.04E-115 | ER degradation-enhancing alpha-mannosidase-like 2;                   |
| Px002919.1 | 1.6022 | 2.42E-22  | 1.76E-21  | Putative N-acetylglucosamine-6-phosphate deacetylase;                |
| Px009715.1 | 1.5988 | 8.85E-16  | 5.24E-15  | Mitochondrial inner membrane protease subunit 1;                     |
| Px013162.1 | 1.5740 | 7.41E-151 | 1.88E-149 | Serine protease snake; similar with SNAK_DROME;                      |
| Px017275.1 | 1.5732 | 4.40E-10  | 1.99E-09  | Inositol monophosphatase 3;                                          |
| Px006124.1 | 1.5716 | 2.01E-24  | 1.53E-23  | Tubulin alpha-2/alpha-4 chain; similar with TBA2_PATVU;              |
| Px002826.2 | 1.5627 | 1.01E-05  | 3.28E-05  | CTD small phosphatase-like protein 2;                                |
| Px014172.1 | 1.5367 | 3.01E-07  | 1.11E-06  | Heparanase; similar with HPSE_BOVIN;                                 |
| Px001106.1 | 1.5290 | 1.97E-08  | 7.95E-08  | Protein retinal degeneration B;                                      |
| Px016262.1 | 1.5084 | 3.45E-19  | 2.30E-18  | Cysteine sulfinic acid decarboxylase;                                |
| Px003229.1 | 1.5011 | 1.66E-09  | 7.28E-09  | Dynein heavy chain 5, axonemal;                                      |
| Px005265.1 | 1.4972 | 1.16E-08  | 4.78E-08  | Ubiquitin carboxyl-terminal hydrolase 6;                             |
| Px016677.1 | 1.4862 | 1.49E-136 | 3.44E-135 | ATP-binding cassette sub-family G member 1;                          |
| Px013984.1 | 1.4786 | 1.70E-11  | 8.37E-11  | Dynein heavy chain 8, axonemal;                                      |

|            |        |           |           |                                                        |
|------------|--------|-----------|-----------|--------------------------------------------------------|
| Px002706.1 | 1.4721 | 0.00E+00  | 0.00E+00  | Lysozyme; similar with LYS_TRINI;                      |
| Px017858.1 | 1.4719 | 1.07E-34  | 1.01E-33  | ATP-binding cassette sub-family G member 1;            |
| Px011489.1 | 1.4705 | 1.48E-69  | 2.16E-68  | Gamma-glutamyl hydrolase A;                            |
| Px011338.1 | 1.4635 | 5.55E-12  | 2.79E-11  | GTP cyclohydrolase 1; similar with GCH1_DROME;         |
| Px015886.1 | 1.4619 | 1.21E-04  | 3.45E-04  | ATP-dependent DNA helicase Q5;                         |
| Px000855.1 | 1.4469 | 1.40E-135 | 3.22E-134 | Juvenile hormone epoxide hydrolase;                    |
| Px014831.2 | 1.4467 | 0.00E+00  | 0.00E+00  | Serine proteinase stubble; similar with STUB_DROME;    |
| Px014586.1 | 1.4462 | 1.33E-30  | 1.17E-29  | Tubulointerstitial nephritis antigen;                  |
| Px007510.1 | 1.4398 | 3.94E-10  | 1.80E-09  | Spectrin beta chain; similar with SPTCB_DROME;         |
| Px015740.3 | 1.4224 | 8.84E-08  | 3.41E-07  | Endoribonuclease Dcr-1; similar with DCR1_DROME;       |
| Px008607.1 | 1.4201 | 1.74E-29  | 1.51E-28  | Ras-related protein Rap-2b; similar with RAP2B_RAT;    |
| Px017644.1 | 1.4197 | 3.55E-06  | 1.20E-05  | Dynein heavy chain 10, axonemal;                       |
| Px013053.1 | 1.4168 | 5.05E-81  | 8.20E-80  | Endoribonuclease Dicer; similar with DICER_MOUSE;      |
| Px008806.2 | 1.4150 | 2.28E-44  | 2.49E-43  | Hydroxyacylglutathione hydrolase, mitochondrial;       |
| Px007577.1 | 1.4133 | 8.83E-12  | 4.40E-11  | Protein N-terminal asparagine amidohydrolase;          |
| Px005726.1 | 1.4124 | 1.92E-12  | 9.85E-12  | Xaa-Pro aminopeptidase 1; similar with XPP1_HUMAN;     |
| Px016080.1 | 1.4117 | 3.08E-05  | 9.48E-05  | Glucosamine-6-phosphate isomerase;                     |
| Px008591.1 | 1.4098 | 1.56E-10  | 7.26E-10  | Hexosaminidase D; similar with HEXDC_HUMAN;            |
| Px012191.1 | 1.4028 | 2.38E-208 | 7.61E-207 | Sodium/potassium-transporting ATPase subunit alpha-1;  |
| Px005747.1 | 1.4025 | 6.57E-16  | 3.92E-15  | Proteasome subunit alpha type-5;                       |
| Px003398.1 | 1.3992 | 2.33E-08  | 9.33E-08  | Probable phospholipid-transporting ATPase IA;          |
| Px009568.1 | 1.3992 | 1.23E-04  | 3.53E-04  | Trypsin, alkaline C; similar with TRYC_MANSE;          |
| Px001847.1 | 1.3803 | 1.09E-180 | 3.16E-179 | Aminoacylase-1; similar with ACY1_MOUSE;               |
| Px005341.1 | 1.3783 | 1.92E-45  | 2.13E-44  | Collagenase; similar with COGS_HYPLI;                  |
| Px001370.1 | 1.3780 | 6.09E-19  | 4.04E-18  | Aminoacylase-1; similar with ACY1_MOUSE;               |
| Px013252.1 | 1.3766 | 0.00E+00  | 0.00E+00  | Calexcitin-2; similar with CEX2_CAEEL;                 |
| Px004590.1 | 1.3727 | 8.33E-05  | 2.43E-04  | Dynein heavy chain 7, axonemal; similar with DYH7_RAT; |
| Px000087.2 | 1.3668 | 5.17E-07  | 1.88E-06  | ATP-binding cassette sub-family G member 4;            |
| Px005329.1 | 1.3592 | 4.00E-66  | 5.66E-65  | Protein ETHE1, mitochondrial;                          |
| Px009798.1 | 1.3537 | 1.57E-40  | 1.63E-39  | Aminoacylase-1A; similar with ACY1A_RAT;               |
| Px006663.1 | 1.3501 | 2.50E-38  | 2.52E-37  | Ribonuclease Oy; similar with RNOY_CRAGI;              |
| Px010161.1 | 1.3476 | 3.12E-26  | 2.50E-25  | GTP cyclohydrolase 1; similar with GCH1_DROME;         |
| Px016171.2 | 1.3471 | 1.79E-54  | 2.21E-53  | Prolyl endopeptidase; similar with PPCE_MOUSE;         |
| Px007369.1 | 1.3403 | 4.19E-08  | 1.65E-07  | DNA excision repair protein haywire;                   |
| Px009117.1 | 1.3403 | 1.32E-09  | 5.80E-09  | Phosphotriesterase-related protein;                    |
| Px015923.1 | 1.3371 | 5.16E-07  | 1.88E-06  | OTU domain-containing protein 1;                       |
| Px012027.3 | 1.3347 | 9.75E-93  | 1.73E-91  | Protein 5NUC; similar with 5NTD_LUTLO;                 |
| Px012523.1 | 1.3305 | 6.77E-16  | 4.04E-15  | Ras-related protein Rab-35; similar with RAB35_RAT;    |
| Px003361.1 | 1.3252 | 8.90E-19  | 5.86E-18  | Cysteine protease ATG4D; similar with ATG4D_MOUSE;     |
| Px007906.2 | 1.3236 | 0.00E+00  | 0.00E+00  | Collagenase; similar with COGS_HYPLI;                  |
| Px009982.1 | 1.3211 | 1.20E-43  | 1.30E-42  | 5-oxoprolinase; similar with OPLA_HUMAN;               |
| Px003782.1 | 1.3205 | 7.56E-110 | 1.51E-108 | Carboxypeptidase E; similar with CBPE_LOPAM;           |
| Px009887.1 | 1.3111 | 4.97E-09  | 2.10E-08  | Probable protein phosphatase 2C T23F11.1;              |
| Px016664.1 | 1.3099 | 2.71E-18  | 1.75E-17  | DNA replication complex GINS protein PSF1;             |
| Px008217.3 | 1.3035 | 8.78E-09  | 3.64E-08  | Phosphatidylinositol 4,5-bisphosphate 5-phosphatase A; |
| Px000513.1 | 1.2987 | 1.37E-31  | 1.23E-30  | Teneurin-2; similar with TEN2_MOUSE;                   |
| Px016679.1 | 1.2867 | 1.13E-05  | 3.64E-05  | ATP-binding cassette transporter subfamily G;          |
| Px008337.1 | 1.2761 | 1.16E-111 | 2.35E-110 | Leishmanolysin-like peptidase;                         |
| Px002715.1 | 1.2673 | 4.39E-154 | 1.12E-152 | Cathepsin L; similar with CATL_DROME;                  |
| Px013298.1 | 1.2577 | 3.36E-51  | 4.02E-50  | Serine proteinase-like protein;                        |
| Px001059.1 | 1.2567 | 2.89E-79  | 4.64E-78  | Beta-1,3-glucan-binding protein;                       |
| Px002767.1 | 1.2554 | 0.00E+00  | 0.00E+00  | Spectrin alpha chain; similar with SPTCA_DROME;        |
| Px006054.1 | 1.2358 | 6.60E-273 | 2.59E-271 | Myosinase 1; similar with MYRO1_BREBR;                 |
| Px001277.2 | 1.2325 | 1.00E-06  | 3.55E-06  | Probable phospholipid-transporting ATPase IIB;         |

|            |         |          |          |                                                                           |
|------------|---------|----------|----------|---------------------------------------------------------------------------|
| Px006295.1 | 1.2186  | 2.27E-05 | 7.07E-05 | ATP-dependent RNA helicase DDX18;                                         |
| Px012198.1 | 1.2125  | 2.46E-68 | 3.54E-67 | Fatty acid synthase; similar with FAS_RAT;                                |
| Px004810.1 | 1.2046  | 7.06E-09 | 2.95E-08 | ADP-ribosylation factor-like protein 2;                                   |
| Px011015.1 | 1.1970  | 2.82E-07 | 1.05E-06 | NAD-dependent deacetylase sirtuin-5;                                      |
| Px001933.1 | 1.1912  | 1.41E-09 | 6.20E-09 | Myosinase 1; similar with MYRO1_BREBR;                                    |
| Px005839.1 | 1.1906  | 1.80E-18 | 1.17E-17 | Mannosyl-oligosaccharide alpha-1,2-mannosidase isoform A;                 |
| Px008946.1 | 1.1905  | 9.69E-78 | 1.54E-76 | Dynein heavy chain 7, axonemal;                                           |
| Px005376.1 | 1.1799  | 4.53E-08 | 1.78E-07 | Chitotriosidase-1; similar with CHIT1_HUMAN;                              |
| Px000499.1 | 1.1782  | 3.06E-54 | 3.76E-53 | Inositol hexakisphosphate and diphosphoinositol-pentakisphosphate kinase; |
| Px008144.2 | 1.1768  | 3.02E-08 | 1.20E-07 | Serine/threonine-protein kinase/endoribonuclease ire-1;                   |
| Px015447.4 | 1.1577  | 9.03E-08 | 3.48E-07 | Probable multidrug resistance-associated protein lethal;                  |
| Px009700.1 | 1.1567  | 6.53E-07 | 2.36E-06 | Phosphotriesterase-related protein;                                       |
| Px000966.1 | 1.1548  | 2.65E-18 | 1.71E-17 | Omega-amidase NIT2; similar with NIT2_BOVIN;                              |
| Px009523.1 | 1.1532  | 3.53E-05 | 1.08E-04 | N(4)-(Beta-N-acetylglucosaminy)-L-asparaginase;                           |
| Px017788.1 | 1.1517  | 2.14E-54 | 2.63E-53 | Serine protease snake; similar with SNAK_DROME;                           |
| Px010099.1 | 1.1453  | 2.76E-19 | 1.85E-18 | Phospholipase D1; similar with PLD1_RAT;                                  |
| Px016675.1 | 1.1203  | 5.63E-11 | 2.69E-10 | ATP-binding cassette sub-family G member 1;                               |
| Px010436.1 | 1.1181  | 3.98E-92 | 7.03E-91 | Venom serine carboxypeptidase; similar with VCP_APIME;                    |
| Px011311.1 | 1.1044  | 8.81E-09 | 3.65E-08 | Proteasome subunit beta type-1;                                           |
| Px003316.1 | 1.0981  | 0.00E+00 | 0.00E+00 | C-1-tetrahydrofolate synthase, cytoplasmic;                               |
| Px016926.1 | 1.0912  | 1.86E-15 | 1.08E-14 | Ubiquitin carboxyl-terminal hydrolase 20;                                 |
| Px008596.1 | 1.0870  | 1.05E-14 | 5.94E-14 | Transmembrane protease serine 9;                                          |
| Px005110.3 | 1.0773  | 2.59E-04 | 7.09E-04 | ABC transporter G family member 23;                                       |
| Px009393.2 | 1.0773  | 2.59E-04 | 7.09E-04 | Guanine deaminase; similar with GUAD_PONAB;                               |
| Px007185.1 | 1.0652  | 1.08E-11 | 5.33E-11 | ATP-binding cassette sub-family G member 4;                               |
| Px013543.1 | 1.0629  | 1.37E-18 | 8.94E-18 | Matrix metalloproteinase-25                                               |
| Px007850.1 | 1.0586  | 5.47E-08 | 2.14E-07 | Dynein heavy chain 2, axonemal;                                           |
| Px015503.1 | 1.0510  | 1.25E-10 | 5.86E-10 | Histone deacetylase 4; similar with HDAC4_MOUSE;                          |
| Px002232.1 | 1.0403  | 8.42E-08 | 3.25E-07 | Spectrin alpha chain; similar with SPTCA_DROME;                           |
| Px016983.3 | 1.0379  | 6.64E-09 | 2.78E-08 | Serine proteinase stubble; similar with STUB_DROME;                       |
| Px013730.1 | 1.0378  | 8.17E-18 | 5.18E-17 | Myosinase 1; similar with MYRO1_BREBR;                                    |
| Px008659.1 | 1.0347  | 2.76E-08 | 1.10E-07 | Tyrosine-protein phosphatase non-receptor type 23;                        |
| Px006391.1 | 1.0276  | 4.24E-21 | 3.00E-20 | ATP-binding cassette sub-family B member 6, mitochondrial;                |
| Px010631.1 | 1.0225  | 2.51E-26 | 2.02E-25 | Sphingomyelin phosphodiesterase;                                          |
| Px004326.1 | 1.0176  | 3.65E-04 | 9.79E-04 | PI-PLC X domain-containing protein 3;                                     |
| Px004984.1 | 1.0033  | 2.67E-04 | 7.30E-04 | Peroxisomal leader peptide-processing protease;                           |
| Px012297.1 | 1.0024  | 1.28E-14 | 7.21E-14 | ABC transporter G family member 20;                                       |
| Px002093.2 | 1.0006  | 1.18E-05 | 3.78E-05 | Ras-like protein 1; similar with RAS1_DROYA;                              |
| Px002896.2 | -1.0039 | 5.09E-96 | 9.24E-95 | Recombination repair protein 1; similar with RRP1_DROME;                  |
| Px014740.1 | -1.0140 | 7.74E-60 | 1.02E-58 | Probable ATP-dependent RNA helicase DDX27;                                |
| Px009226.1 | -1.0167 | 9.86E-10 | 4.37E-09 | DNA replication licensing factor MCM4;                                    |
| Px002786.1 | -1.0167 | 2.80E-85 | 4.70E-84 | Elongation factor Tu, mitochondrial;                                      |
| Px008828.1 | -1.0322 | 1.20E-16 | 7.32E-16 | Uncharacterized protein C2orf79 homolog;                                  |
| Px001502.1 | -1.0334 | 1.38E-18 | 9.02E-18 | Ubiquitin carboxyl-terminal hydrolase 2;                                  |
| Px014608.2 | -1.0993 | 1.84E-38 | 1.86E-37 | AGAP011281-PA; similar with Q7QHP0_ANOGA;                                 |
| Px013179.1 | -1.1092 | 3.73E-04 | 9.98E-04 | Insulin-degrading enzyme; similar with IDE_HUMAN;                         |
| Px004104.1 | -1.1191 | 3.46E-06 | 1.17E-05 | GH18371; similar with B4JEW4_DROGR;                                       |
| Px015490.1 | -1.1584 | 5.68E-45 | 6.25E-44 | Probable ATP-dependent RNA helicase DDX52;                                |
| Px000827.1 | -1.1679 | 2.17E-07 | 8.16E-07 | Ubiquitin carboxyl-terminal hydrolase 2;                                  |
| Px017914.1 | -1.1872 | 0.00E+00 | 0.00E+00 | Paramyosin, long form; similar with MYSP1_DROME;                          |
| Px002758.1 | -1.2096 | 1.96E-07 | 7.39E-07 | RNA polymerase II subunit B1 CTD phosphatase Rpap2;                       |
| Px017913.1 | -1.2473 | 0.00E+00 | 0.00E+00 | Paramyosin, short form; similar with MYSP2_DROME;                         |
| Px007815.1 | -1.2476 | 0.00E+00 | 0.00E+00 | Myosin heavy chain, muscle;                                               |
| Px012158.1 | -1.2615 | 1.63E-10 | 7.54E-10 | Alpha-N-acetylgalactosaminidase;                                          |



|            |         |           |           |                                                                      |
|------------|---------|-----------|-----------|----------------------------------------------------------------------|
| Px016541.1 | -1.2656 | 6.55E-07  | 2.37E-06  | Elongation factor Tu, mitochondrial;                                 |
| Px002640.1 | -1.2858 | 0.00E+00  | 0.00E+00  | Alpha-actinin, sarcomeric; similar with ACTN_DROME;                  |
| Px012129.1 | -1.2949 | 1.78E-33  | 1.64E-32  | Lysosomal Pro-X carboxypeptidase;                                    |
| Px015632.1 | -1.3238 | 2.97E-07  | 1.10E-06  | Flap endonuclease 1; similar with FEN1_DROAN;                        |
| Px009149.1 | -1.3366 | 4.40E-70  | 6.46E-69  | 116 kDa U5 small nuclear ribonucleoprotein component;                |
| Px008876.1 | -1.3446 | 1.07E-09  | 4.74E-09  | Tubulin beta-4 chain; similar with TBB4_CAEEL;                       |
| Px010423.1 | -1.3483 | 1.94E-09  | 8.45E-09  | G/T mismatch-specific thymine DNA glycosylase;                       |
| Px017176.1 | -1.3522 | 4.34E-23  | 3.21E-22  | Probable ATP-dependent RNA helicase kurz;                            |
| Px010023.2 | -1.3680 | 1.39E-22  | 1.02E-21  | ATP-dependent RNA helicase DDX24;                                    |
| Px009314.2 | -1.3802 | 1.36E-12  | 7.02E-12  | A disintegrin and metalloproteinase with thrombospondin motifs 16;   |
| Px008352.1 | -1.3967 | 7.24E-17  | 4.46E-16  | SOX domain-containing protein dichaeete;                             |
| Px004087.1 | -1.3985 | 1.15E-50  | 1.37E-49  | Signal peptidase complex subunit 2;                                  |
| Px009337.1 | -1.4082 | 8.00E-05  | 2.35E-04  | M-phase inducer phosphatase;                                         |
| Px006766.1 | -1.4330 | 1.04E-119 | 2.20E-118 | ATP-binding cassette sub-family F member 1;                          |
| Px011795.1 | -1.4417 | 5.27E-29  | 4.51E-28  | RuvB-like helicase 2; similar with RUVB2_DROPS;                      |
| Px000037.1 | -1.4737 | 2.19E-29  | 1.89E-28  | DNA replication licensing factor Mcm5;                               |
| Px000572.1 | -1.4791 | 1.12E-04  | 3.23E-04  | Phosphatidylinositol-binding clathrin assembly protein LAP;          |
| Px016332.1 | -1.5166 | 0.00E+00  | 0.00E+00  | Calcium-transporting ATPase sarcoplasmic/endoplasmic reticulum type; |
| Px002987.1 | -1.5181 | 0.00E+00  | 0.00E+00  | Methionine aminopeptidase 2;                                         |
| Px010951.2 | -1.5366 | 3.53E-143 | 8.64E-142 | Lysosomal alpha-mannosidase; similar with MA2B1_CAVPO;               |
| Px013405.1 | -1.5636 | 1.01E-18  | 6.66E-18  | CAP isoform A; similar with C9DTM4_BOMMO;                            |
| Px016787.1 | -1.6669 | 1.01E-06  | 3.59E-06  | Insulin-degrading enzyme; similar with IDE_HUMAN;                    |
| Px003941.1 | -1.7142 | 4.69E-05  | 1.42E-04  | Probable phospholipid-transporting ATPase IA;                        |
| Px014610.1 | -1.7464 | 1.84E-20  | 1.28E-19  | Tubulin beta-2 chain; similar with TBB2_HOMAM;                       |
| Px011896.1 | -2.2353 | 0.00E+00  | 0.00E+00  | PAB-dependent poly(A)-specific ribonuclease subunit 2;               |
| Px012510.1 | -2.2884 | 1.67E-09  | 7.30E-09  | N-glycosylase/DNA lyase; similar with OGG1_DROME;                    |
| Px009429.3 | -2.5772 | 1.39E-110 | 2.81E-109 | ATP-dependent RNA helicase DDX24;                                    |
| Px017404.1 | -2.6008 | 9.07E-06  | 2.95E-05  | Fidgetin-like protein 1; similar with FIGL1_XENLA;                   |
| Px012212.1 | -2.8769 | 4.13E-06  | 1.39E-05  | Multidrug resistance protein homolog 49;                             |
| Px010814.1 | -3.0382 | 1.61E-05  | 5.11E-05  | ADAMTS-like protein 3; similar with ATL3_HUMAN;                      |
| Px012074.1 | #####   | 3.46E-04  | 9.33E-04  | Acylphosphatase-2; similar with ACYP2_ANAPL;                         |

**GO:0003824**

|            |         |          |          |                                                                                 |
|------------|---------|----------|----------|---------------------------------------------------------------------------------|
| Px015905.1 | 13.4712 | 1.77E-71 | 2.63E-70 | Transmembrane protease serine 6;                                                |
| Px003000.1 | 12.5364 | 2.28E-42 | 2.43E-41 | Transmembrane protease serine 6;                                                |
| Px015074.1 | 11.6135 | 2.99E-08 | 1.19E-07 | Dynein light chain Tctex-type 1;                                                |
| Px003417.1 | 11.0707 | 4.48E-16 | 2.69E-15 | Beta-1,3-galactosyltransferase 5;                                               |
| Px012802.1 | 10.9217 | 9.55E-06 | 3.10E-05 | GH16830; similar with B4IWX8_DROGR;                                             |
| Px009803.1 | 10.8775 | 1.46E-08 | 5.93E-08 | Probable chitinase 2; similar with CHIT2_DROME;                                 |
| Px008374.1 | 10.7904 | 2.99E-08 | 1.19E-07 | Phosphatidylinositol-4,5-bisphosphate 3-kinase catalytic subunit delta isoform; |
| Px012560.1 | 10.5968 | 1.26E-07 | 4.83E-07 | Lipase member H-B; similar with LIPHB_XENLA;                                    |
| Px009423.1 | 10.3964 | 3.44E-09 | 1.47E-08 | Putative uncharacterized protein;                                               |
| Px007620.1 | 10.3950 | 8.15E-10 | 3.63E-09 | Trypsin CFT-1; similar with TRYP_CHOFU;                                         |
| Px001433.1 | 10.3916 | 1.08E-11 | 5.35E-11 | Probable chitinase 2; similar with CHIT2_DROME;                                 |
| Px006453.1 | 10.3391 | 8.15E-10 | 3.63E-09 | Transmembrane protease serine 6;                                                |
| Px006069.1 | 10.0136 | 2.26E-06 | 7.79E-06 | Trypsin CFT-1; similar with TRYP_CHOFU;                                         |
| Px009935.1 | 9.9490  | 3.51E-04 | 9.43E-04 | Cytochrome P450 6d3; similar with CP6D3_MUSDO;                                  |
| Px011676.1 | 9.9119  | 4.04E-05 | 1.22E-04 | Alpha-aminoacidic semialdehyde synthase, mitochondrial;                         |
| Px017505.1 | 9.7974  | 1.71E-04 | 4.81E-04 | Plasma kallikrein; similar with KLKB1_HUMAN;                                    |
| Px002969.1 | 9.6359  | 1.96E-05 | 6.16E-05 | Adenylate kinase isoenzyme 1; similar with KAD1_RAT;                            |
| Px008029.1 | 9.1359  | 8.30E-05 | 2.43E-04 | cAMP-dependent protein kinase catalytic subunit alpha;                          |
| Px014880.1 | 8.9447  | 4.64E-06 | 1.55E-05 | ATP synthase subunit beta, mitochondrial;                                       |
| Px013802.1 | 8.5527  | 1.46E-08 | 5.93E-08 | Sodium/potassium-transporting ATPase subunit alpha-2;                           |
| Px016580.1 | 8.3897  | 3.51E-04 | 9.44E-04 | T-complex protein 1 subunit epsilon;                                            |

|            |        |           |           |                                                                       |
|------------|--------|-----------|-----------|-----------------------------------------------------------------------|
| Px015148.1 | 8.0644 | 1.96E-05  | 6.16E-05  | ATP synthase subunit beta, mitochondrial;                             |
| Px015265.1 | 6.8160 | 1.67E-09  | 7.31E-09  | Dynein beta chain, ciliary; similar with DYHC_TRIGR;                  |
| Px008062.1 | 6.7684 | 1.28E-182 | 3.76E-181 | Endochitinase; similar with CHIT_MANSE;                               |
| Px008830.1 | 6.6433 | 1.43E-111 | 2.90E-110 | Trypsin, alkaline C; similar with TRYC_MANSE;                         |
| Px001804.1 | 6.5119 | 2.83E-51  | 3.39E-50  | Trypsin, alkaline B; similar with TRYB_MANSE;                         |
| Px007670.1 | 6.2472 | 5.75E-63  | 7.92E-62  | Proclotting enzyme; similar with PCE_TACTR;                           |
| Px010971.1 | 5.2472 | 1.05E-10  | 4.92E-10  | Trypsin CFT-1; similar with TRYP_CHOFU;                               |
| Px015893.1 | 4.9841 | 6.70E-09  | 2.81E-08  | Putative inner dynein arm light chain, axonemal;                      |
| Px014882.1 | 4.8506 | 4.25E-162 | 1.13E-160 | Trypsin, alkaline C; similar with TRYC_MANSE;                         |
| Px015921.1 | 4.7402 | 1.00E-39  | 1.03E-38  | Putative uncharacterized protein;                                     |
| Px008276.1 | 4.6077 | 0.00E+00  | 0.00E+00  | Membrane alanyl aminopeptidase;                                       |
| Px016055.1 | 4.5497 | 4.52E-56  | 5.70E-55  | Trypsin, alkaline C; similar with TRYC_MANSE;                         |
| Px002864.1 | 4.5298 | 1.55E-103 | 3.01E-102 | Trypsin, alkaline B; similar with TRYB_MANSE;                         |
| Px000995.2 | 4.3915 | 0.00E+00  | 0.00E+00  | Carboxypeptidase A4; similar with CBPA4_HUMAN;                        |
| Px005241.1 | 4.3794 | 1.43E-53  | 1.74E-52  | Trypsin CFT-1; similar with TRYP_CHOFU;                               |
| Px005268.1 | 4.3252 | 1.24E-05  | 3.97E-05  | Glucose dehydrogenase [acceptor];                                     |
| Px000084.1 | 4.3183 | 5.99E-51  | 7.13E-50  | Cysteine sulfinic acid decarboxylase;                                 |
| Px016053.1 | 4.2124 | 5.01E-59  | 6.53E-58  | Trypsin; similar with TRYP_PHACE;                                     |
| Px000702.1 | 4.1858 | 2.08E-17  | 1.30E-16  | NADH dehydrogenase [ubiquinone] iron-sulfur protein 2, mitochondrial; |
| Px009637.1 | 4.1028 | 1.35E-27  | 1.13E-26  | Trypsin CFT-1; similar with TRYP_CHOFU;                               |
| Px000291.1 | 4.0996 | 2.97E-16  | 1.79E-15  | Myrosinase 1; similar with MYRO1_BREBR;                               |
| Px002586.1 | 4.0373 | 5.30E-58  | 6.84E-57  | Trypsin CFT-1; similar with TRYP_CHOFU;                               |
| Px013377.1 | 4.0330 | 2.06E-219 | 6.86E-218 | Trypsin; similar with TRYP_PHACE;                                     |
| Px015276.1 | 4.0315 | 9.55E-65  | 1.33E-63  | Trypsin CFT-1; similar with TRYP_CHOFU;                               |
| Px000359.2 | 4.0159 | 3.40E-22  | 2.47E-21  | Alpha-methyl dopa hypersensitive protein;                             |
| Px005243.1 | 3.9876 | 0.00E+00  | 0.00E+00  | Trypsin, alkaline A; similar with TRYA_MANSE;                         |
| Px015277.1 | 3.9698 | 7.98E-158 | 2.09E-156 | Trypsin CFT-1; similar with TRYP_CHOFU;                               |
| Px004490.1 | 3.9557 | 0.00E+00  | 0.00E+00  | Adenosine deaminase CECR1;                                            |
| Px014859.2 | 3.9352 | 1.13E-07  | 4.34E-07  | Uridine phosphorylase 1; similar with UPP1_MOUSE;                     |
| Px012913.1 | 3.8855 | 0.00E+00  | 0.00E+00  | Chitin synthase 6; similar with CHS6_USTMA;                           |
| Px006518.1 | 3.8846 | 1.12E-13  | 6.06E-13  | Probable protein phosphatase 2C T23F11.1;                             |
| Px009202.1 | 3.8846 | 3.51E-04  | 9.44E-04  | Myosin heavy chain, non-muscle;                                       |
| Px016657.1 | 3.8498 | 2.94E-10  | 1.35E-09  | Katanin p60 ATPase-containing subunit;                                |
| Px009019.1 | 3.7997 | 1.15E-15  | 6.76E-15  | Uridine phosphorylase 1; similar with UPP1_MOUSE;                     |
| Px010313.2 | 3.7896 | 2.43E-106 | 4.78E-105 | Serine proteinase stubble; similar with STUB_DROME;                   |
| Px006571.1 | 3.7885 | 0.00E+00  | 0.00E+00  | Trypsin, alkaline B; similar with TRYB_MANSE;                         |
| Px006623.1 | 3.7777 | 1.10E-26  | 9.00E-26  | Transmembrane protease serine 9;                                      |
| Px009254.3 | 3.7703 | 2.83E-43  | 3.04E-42  | Cyclin-dependent kinase-like 2;                                       |
| Px013732.1 | 3.7553 | 4.20E-15  | 2.42E-14  | Proteasome subunit alpha type-7-1;                                    |
| Px009370.2 | 3.7497 | 2.91E-12  | 1.48E-11  | Prostaglandin reductase 1; similar with PTGR1_BOVIN;                  |
| Px002634.1 | 3.7211 | 1.56E-06  | 5.44E-06  | Beta-1,4-N-acetylgalactosaminyltransferase bre-4;                     |
| Px008031.1 | 3.6920 | 1.06E-11  | 5.27E-11  | cAMP-dependent protein kinase catalytic subunit alpha;                |
| Px012045.3 | 3.6672 | 2.30E-186 | 6.84E-185 | Glucose dehydrogenase [acceptor];                                     |
| Px012813.1 | 3.6622 | 2.98E-06  | 1.02E-05  | Serine proteinase stubble; similar with STUB_DROME;                   |
| Px016942.1 | 3.6242 | 1.71E-40  | 1.77E-39  | NADH dehydrogenase [ubiquinone] 1 beta subcomplex subunit 9;          |
| Px014201.1 | 3.6008 | 7.33E-11  | 3.48E-10  | Sodium/potassium-transporting ATPase subunit alpha-2;                 |
| Px000992.1 | 3.6006 | 0.00E+00  | 0.00E+00  | Carboxypeptidase A1; similar with CBPA1_BOVIN;                        |
| Px000114.1 | 3.5971 | 6.55E-42  | 6.92E-41  | Sulfotransferase 1C4; similar with ST1C4_HUMAN;                       |
| Px007617.1 | 3.5958 | 0.00E+00  | 0.00E+00  | Trypsin CFT-1; similar with TRYP_CHOFU;                               |
| Px011202.1 | 3.5882 | 8.25E-143 | 2.01E-141 | Aromatic-L-amino-acid decarboxylase;                                  |
| Px002116.1 | 3.5798 | 2.74E-08  | 1.10E-07  | ATP-binding cassette sub-family G member 1;                           |
| Px008495.2 | 3.5537 | 1.86E-106 | 3.67E-105 | Peptidoglycan-recognition protein LB;                                 |
| Px008783.1 | 3.5367 | 1.08E-05  | 3.49E-05  | Long-chain fatty acid transport protein 1;                            |
| Px006572.1 | 3.4867 | 0.00E+00  | 0.00E+00  | Trypsin; similar with TRYP_PHACE;                                     |

|            |        |           |           |                                                                       |
|------------|--------|-----------|-----------|-----------------------------------------------------------------------|
| Px003371.1 | 3.4542 | 6.30E-39  | 6.39E-38  | NADH dehydrogenase [ubiquinone] 1 alpha subcomplex subunit 8;         |
| Px005765.1 | 3.4325 | 1.33E-62  | 1.82E-61  | Vitellin-degrading protease;                                          |
| Px016056.1 | 3.4297 | 0.00E+00  | 0.00E+00  | Trypsin, alkaline A; similar with TRYA_MANSE;                         |
| Px008538.1 | 3.4202 | 3.15E-138 | 7.39E-137 | Trypsin, alkaline B; similar with TRYB_MANSE;                         |
| Px005657.1 | 3.4122 | 1.95E-23  | 1.46E-22  | Proclotting enzyme; similar with PCE_TACTR;                           |
| Px013214.1 | 3.3992 | 3.25E-13  | 1.73E-12  | Peroxisomal N(1)-acetyl-spermine/spermidine oxidase;                  |
| Px001762.1 | 3.3992 | 3.26E-11  | 1.58E-10  | Sucrose-6-phosphate hydrolase;                                        |
| Px012048.1 | 3.3901 | 4.29E-64  | 5.96E-63  | Chymotrypsin BI; similar with CTRB1_LITVA;                            |
| Px007621.1 | 3.3847 | 6.61E-21  | 4.65E-20  | Trypsin CFT-1; similar with TRYP_CHOFU;                               |
| Px006617.2 | 3.3534 | 1.05E-31  | 9.40E-31  | Chorion peroxidase; similar with PERC_DROME;                          |
| Px017503.2 | 3.3503 | 2.24E-18  | 1.45E-17  | Probable chitinase 2; similar with CHIT2_DROME;                       |
| Px008277.1 | 3.3443 | 1.09E-141 | 2.62E-140 | Membrane alanyl aminopeptidase;                                       |
| Px007120.2 | 3.3099 | 1.50E-19  | 1.02E-18  | ATP synthase subunit beta, mitochondrial;                             |
| Px000993.1 | 3.2755 | 0.00E+00  | 0.00E+00  | Carboxypeptidase A2; similar with CBPA2_RAT;                          |
| Px000991.6 | 3.2679 | 0.00E+00  | 0.00E+00  | Carboxypeptidase O; similar with CBPO_BOVIN;                          |
| Px006485.1 | 3.2472 | 1.38E-04  | 3.92E-04  | Activin receptor type-1; similar with ACVR1_MOUSE;                    |
| Px013989.1 | 3.2472 | 4.09E-08  | 1.62E-07  | NADH dehydrogenase [ubiquinone] flavoprotein 2, mitochondrial;        |
| Px015279.1 | 3.2472 | 1.79E-18  | 1.17E-17  | Trypsin, alkaline A; similar with TRYA_MANSE;                         |
| Px004168.1 | 3.2472 | 2.59E-13  | 1.38E-12  | Plasma kallikrein; similar with KLKB1_HUMAN;                          |
| Px012568.1 | 3.2398 | 0.00E+00  | 0.00E+00  | Trypsin CFT-1; similar with TRYP_CHOFU;                               |
| Px007471.1 | 3.2141 | 3.12E-82  | 5.11E-81  | Pyruvate kinase; similar with KPYK_DROME;                             |
| Px013918.1 | 3.2126 | 0.00E+00  | 0.00E+00  | Putative uncharacterized protein;                                     |
| Px005513.1 | 3.1816 | 1.98E-25  | 1.56E-24  | Polypeptide N-acetylgalactosaminyltransferase 1;                      |
| Px010386.1 | 3.1714 | 0.00E+00  | 0.00E+00  | Trypsin CFT-1; similar with TRYP_CHOFU;                               |
| Px013274.1 | 3.1667 | 4.10E-69  | 5.97E-68  | Ubiquitin carboxyl-terminal hydrolase 7;                              |
| Px015741.1 | 3.1647 | 2.57E-04  | 7.05E-04  | Endoribonuclease Dicer; similar with DICER_BOVIN;                     |
| Px015928.1 | 3.1647 | 2.57E-04  | 7.05E-04  | Carboxypeptidase B; similar with CBPB_ASTFL;                          |
| Px009262.1 | 3.1647 | 2.57E-04  | 7.05E-04  | Slowpoke-binding protein; similar with SLOB_DROME;                    |
| Px013999.1 | 3.1647 | 1.41E-07  | 5.38E-07  | GL23714; similar with B4G658_DROPE;                                   |
| Px001081.1 | 3.1539 | 0.00E+00  | 0.00E+00  | Unknown function                                                      |
| Px016054.1 | 3.1536 | 3.24E-37  | 3.20E-36  | Trypsin; similar with TRYP_PHACE;                                     |
| Px006580.1 | 3.1217 | 2.62E-07  | 9.75E-07  | Mitochondrial cardiolipin hydrolase;                                  |
| Px007619.2 | 3.0951 | 0.00E+00  | 0.00E+00  | Trypsin, alkaline A; similar with TRYA_MANSE;                         |
| Px005368.1 | 3.0773 | 1.61E-47  | 1.85E-46  | Malate dehydrogenase 2, mitochondrial;                                |
| Px005671.1 | 3.0773 | 4.83E-07  | 1.76E-06  | Pyrazinamidase/nicotinamidase; similar with PNCA_ECOLI;               |
| Px007676.1 | 3.0603 | 2.33E-107 | 4.62E-106 | Chymotrypsin-C; similar with CTRC_HUMAN;                              |
| Px002861.1 | 3.0431 | 0.00E+00  | 0.00E+00  | Trypsin, alkaline C; similar with TRYC_MANSE;                         |
| Px009639.1 | 3.0376 | 0.00E+00  | 0.00E+00  | Trypsin CFT-1; similar with TRYP_CHOFU;                               |
| Px007903.1 | 2.9954 | 0.00E+00  | 0.00E+00  | Collagenase; similar with COGS_HYPLI;                                 |
| Px005244.1 | 2.9796 | 7.91E-29  | 6.74E-28  | Trypsin CFT-1; similar with TRYP_CHOFU;                               |
| Px015049.1 | 2.9693 | 5.52E-35  | 5.22E-34  | Venom dipeptidyl peptidase 4;                                         |
| Px004698.1 | 2.9517 | 1.27E-16  | 7.77E-16  | NADH dehydrogenase [ubiquinone] iron-sulfur protein 8, mitochondrial; |
| Px005724.3 | 2.9382 | 3.59E-86  | 6.08E-85  | Xaa-Pro aminopeptidase 1; similar with XPP1_MOUSE;                    |
| Px003660.1 | 2.9352 | 2.46E-11  | 1.20E-10  | NADH dehydrogenase [ubiquinone] iron-sulfur protein 7, mitochondrial; |
| Px008281.1 | 2.9352 | 2.46E-11  | 1.20E-10  | Kinesin-like protein KIF12; similar with KIF12_MOUSE;                 |
| Px003479.1 | 2.9314 | 1.50E-17  | 9.44E-17  | Protein rhomboid; similar with RHOM_DROME;                            |
| Px011683.2 | 2.9306 | 0.00E+00  | 0.00E+00  | Venom carboxylesterase-6; similar with EST6_APIME;                    |
| Px002784.1 | 2.9253 | 1.81E-07  | 6.86E-07  | Multidrug resistance-associated protein 7;                            |
| Px015280.1 | 2.9138 | 7.05E-10  | 3.15E-09  | Trypsin CFT-1; similar with TRYP_CHOFU;                               |
| Px009987.1 | 2.8978 | 1.47E-38  | 1.48E-37  | Caspase-1; similar with CASP1_DROME;                                  |
| Px006570.1 | 2.8972 | 0.00E+00  | 0.00E+00  | Trypsin, alkaline B; similar with TRYB_MANSE;                         |
| Px000616.1 | 2.8942 | 0.00E+00  | 0.00E+00  | Tubulin alpha chain; similar with TBA_TORMA;                          |
| Px000994.1 | 2.8631 | 0.00E+00  | 0.00E+00  | Zinc carboxypeptidase A 1; similar with CBPA1_DROPS;                  |
| Px009638.1 | 2.8523 | 0.00E+00  | 0.00E+00  | Trypsin, alkaline B; similar with TRYB_MANSE;                         |

|            |        |           |           |                                                                           |
|------------|--------|-----------|-----------|---------------------------------------------------------------------------|
| Px002141.1 | 2.8381 | 6.72E-42  | 7.09E-41  | Probable phospholipid-transporting ATPase IF;                             |
| Px008030.1 | 2.8370 | 3.71E-26  | 2.97E-25  | cAMP-dependent protein kinase catalytic subunit;                          |
| Px012332.1 | 2.8227 | 3.03E-20  | 2.09E-19  | ATP synthase subunit beta, mitochondrial;                                 |
| Px011608.1 | 2.8142 | 1.67E-04  | 4.72E-04  | Fanconi-associated nuclease 1; similar with FAN1_DANRE;                   |
| Px016752.1 | 2.8120 | 1.98E-36  | 1.92E-35  | Glutamate dehydrogenase 2, mitochondrial;                                 |
| Px013778.1 | 2.8072 | 0.00E+00  | 0.00E+00  | Chitin synthase 3; similar with CHS3_USTMA;                               |
| Px002587.1 | 2.7903 | 0.00E+00  | 0.00E+00  | Trypsin CFT-1; similar with TRYP_CHOFU;                                   |
| Px011553.1 | 2.7787 | 9.89E-243 | 3.55E-241 | cGMP-dependent protein kinase, isozyme 1;                                 |
| Px002993.1 | 2.7717 | 0.00E+00  | 0.00E+00  | Zinc metalloproteinase nas-4; similar with NAS4_CAEEL;                    |
| Px015388.1 | 2.7618 | 1.35E-08  | 5.50E-08  | Nose resistant to fluoxetine protein 6;                                   |
| Px005373.1 | 2.7565 | 1.52E-39  | 1.56E-38  | Carboxypeptidase B; similar with CBPB_ASTFL;                              |
| Px002047.1 | 2.7527 | 1.74E-261 | 6.60E-260 | Uncharacterized family 31 glucosidase KIAA1161;                           |
| Px016235.1 | 2.7497 | 1.52E-09  | 6.70E-09  | 3-oxoacyl-[acyl-carrier-protein] reductase FabG;                          |
| Px002926.1 | 2.7459 | 2.44E-55  | 3.05E-54  | Choline dehydrogenase, mitochondrial;                                     |
| Px016263.3 | 2.7402 | 1.48E-13  | 7.96E-13  | ATP-binding cassette sub-family G member 4;                               |
| Px000107.1 | 2.7335 | 0.00E+00  | 0.00E+00  | Trypsin, alkaline C; similar with TRYC_MANSE;                             |
| Px001079.1 | 2.7320 | 0.00E+00  | 0.00E+00  | Unknown function                                                          |
| Px007618.1 | 2.7222 | 1.13E-272 | 4.41E-271 | Trypsin CFT-1; similar with TRYP_CHOFU;                                   |
| Px011887.1 | 2.7196 | 0.00E+00  | 0.00E+00  | Trypsin, alkaline C; similar with TRYC_MANSE;                             |
| Px002980.1 | 2.7147 | 3.10E-10  | 1.42E-09  | Putative deoxyribose-phosphate aldolase;                                  |
| Px009286.1 | 2.7141 | 0.00E+00  | 0.00E+00  | Trypsin, alkaline C; similar with TRYC_MANSE;                             |
| Px002274.1 | 2.7121 | 0.00E+00  | 0.00E+00  | Phenoloxidase subunit 2; similar with PRP2_BOMMO;                         |
| Px013288.1 | 2.7099 | 5.83E-272 | 2.27E-270 | Tubulin beta chain; similar with TBB_PARLI;                               |
| Px005936.2 | 2.7085 | 3.12E-86  | 5.29E-85  | Trypsin, alkaline C; similar with TRYC_MANSE;                             |
| Px013968.1 | 2.6816 | 1.66E-71  | 2.47E-70  | Dual specificity protein phosphatase 19;                                  |
| Px006228.1 | 2.6731 | 3.87E-22  | 2.80E-21  | Beta-1,3-galactosyltransferase 5;                                         |
| Px002865.1 | 2.6726 | 0.00E+00  | 0.00E+00  | Trypsin 5G1; similar with TRY5_AEDAE;                                     |
| Px009784.1 | 2.6561 | 0.00E+00  | 0.00E+00  | Ribosome-binding protein 1;                                               |
| Px000119.2 | 2.6517 | 0.00E+00  | 0.00E+00  | Inositol hexakisphosphate and diphosphoinositol-pentakisphosphate kinase; |
| Px016567.1 | 2.6458 | 1.14E-175 | 3.25E-174 | Matrix metalloproteinase-14;                                              |
| Px004610.1 | 2.6440 | 7.63E-86  | 1.29E-84  | Sphingosine-1-phosphate lyase;                                            |
| Px006940.2 | 2.6353 | 0.00E+00  | 0.00E+00  | Cytosolic beta-glucosidase; similar with GBA3_CAVPO;                      |
| Px002441.1 | 2.6127 | 4.36E-75  | 6.75E-74  | Trypsin, alkaline B; similar with TRYB_MANSE;                             |
| Px018074.1 | 2.6056 | 3.91E-24  | 2.97E-23  | Chymotrypsin-like elastase family member 2A;                              |
| Px000395.1 | 2.6001 | 0.00E+00  | 0.00E+00  | Alpha-amylase 4N; similar with AM4N_DROAN;                                |
| Px006728.1 | 2.5849 | 0.00E+00  | 0.00E+00  | Sucrose-6-phosphate hydrolase;                                            |
| Px006600.1 | 2.5735 | 7.58E-284 | 3.05E-282 | Acetylcholinesterase; similar with ACES_BOVIN;                            |
| Px011889.1 | 2.5691 | 1.52E-21  | 1.09E-20  | Achelase-1; similar with ACH1_LONAC;                                      |
| Px017228.1 | 2.5584 | 2.52E-11  | 1.23E-10  | Facilitated trehalose transporter Tret1;                                  |
| Px011359.1 | 2.5541 | 3.85E-26  | 3.07E-25  | Dynein light chain roadblock-type 1;                                      |
| Px009757.1 | 2.5486 | 2.19E-10  | 1.01E-09  | Proteasome subunit beta type-2; similar with PSB2_MOUSE;                  |
| Px006305.1 | 2.5477 | 4.59E-69  | 6.67E-68  | E3 ubiquitin-protein ligase SINA-like 2;                                  |
| Px011283.1 | 2.5473 | 9.94E-62  | 1.34E-60  | Alpha N-terminal protein methyltransferase 1A;                            |
| Px005866.1 | 2.5435 | 0.00E+00  | 0.00E+00  | Zinc carboxypeptidase A 1;                                                |
| Px005277.3 | 2.5372 | 0.00E+00  | 0.00E+00  | Lactase-phlorizin hydrolase; similar with LPH_HUMAN;                      |
| Px001977.1 | 2.5367 | 1.82E-04  | 5.08E-04  | Tyrosine-protein phosphatase 99A;                                         |
| Px003486.1 | 2.5359 | 0.00E+00  | 0.00E+00  | Probable maltase H; similar with MAL2_DROME;                              |
| Px005199.1 | 2.5327 | 1.44E-159 | 3.81E-158 | Long-chain fatty acid transport protein 4;                                |
| Px014883.1 | 2.5298 | 7.38E-32  | 6.64E-31  | Ecdysteroid UDP-glucosyltransferase;                                      |
| Px005820.1 | 2.5294 | 1.10E-144 | 2.70E-143 | Glutaminy-peptide cyclotransferase;                                       |
| Px014887.1 | 2.5258 | 3.34E-136 | 7.70E-135 | Dihydropteridine reductase; similar with DHPR_RAT;                        |
| Px007674.2 | 2.5239 | 0.00E+00  | 0.00E+00  | Collagenase; similar with COGS_HYPLI;                                     |
| Px007675.1 | 2.5233 | 0.00E+00  | 0.00E+00  | Collagenase; similar with COGS_HYPLI;                                     |
| Px004489.1 | 2.5013 | 7.47E-48  | 8.61E-47  | Adenosine deaminase CECR1;                                                |

|            |        |           |           |                                                                       |
|------------|--------|-----------|-----------|-----------------------------------------------------------------------|
| Px009766.1 | 2.4923 | 6.69E-06  | 2.20E-05  | Lysosomal Pro-X carboxypeptidase;                                     |
| Px002046.1 | 2.4907 | 0.00E+00  | 0.00E+00  | Uncharacterized family 31 glucosidase KIAA1161;                       |
| Px007677.1 | 2.4787 | 0.00E+00  | 0.00E+00  | Trypsin-7; similar with TRY7_ANOGA;                                   |
| Px013884.1 | 2.4758 | 5.37E-18  | 3.43E-17  | Probable cytochrome P450 9f2;                                         |
| Px012582.1 | 2.4724 | 2.13E-127 | 4.68E-126 | Collagenase; similar with COGS_HYPLI;                                 |
| Px007691.1 | 2.4696 | 3.21E-04  | 8.67E-04  | Polypeptide N-acetylgalactosaminyltransferase 1;                      |
| Px004163.1 | 2.4696 | 2.57E-07  | 9.61E-07  | Ubiquitin carboxyl-terminal hydrolase 8;                              |
| Px015266.1 | 2.4663 | 4.55E-17  | 2.83E-16  | Glutathione S-transferase omega-1;                                    |
| Px001785.1 | 2.4629 | 2.00E-24  | 1.53E-23  | Gamma-glutamyltranspeptidase 1; similar with GGT1_PIG;                |
| Px010022.2 | 2.4600 | 2.32E-49  | 2.71E-48  | Cytosolic beta-glucosidase; similar with GBA3_CAVPO;                  |
| Px014181.2 | 2.4517 | 2.43E-111 | 4.92E-110 | Aldose 1-epimerase; similar with GALM_PIG;                            |
| Px008848.1 | 2.4433 | 2.05E-168 | 5.68E-167 | Myrosinase 1; similar with MYRO1_BREBR;                               |
| Px014981.1 | 2.4259 | 0.00E+00  | 0.00E+00  | Cytochrome P450 9e2; similar with CP9E2_BLAGE;                        |
| Px011894.1 | 2.4252 | 3.52E-09  | 1.50E-08  | Fatty-acid amide hydrolase 2; similar with FAAH2_HUMAN;               |
| Px016058.1 | 2.4185 | 0.00E+00  | 0.00E+00  | Trypsin, alkaline C; similar with TRYC_MANSE;                         |
| Px007814.1 | 2.4181 | 0.00E+00  | 0.00E+00  | Multiple inositol polyphosphate phosphatase 1;                        |
| Px002588.1 | 2.4151 | 4.81E-14  | 2.66E-13  | Trypsin, alkaline C; similar with TRYC_MANSE;                         |
| Px002118.1 | 2.4143 | 0.00E+00  | 0.00E+00  | Alpha,alpha-trehalose-phosphate synthase [UDP-forming] A;             |
| Px010489.1 | 2.4085 | 6.89E-66  | 9.73E-65  | Trypsin, alkaline C; similar with TRYC_MANSE;                         |
| Px002416.1 | 2.4045 | 6.85E-76  | 1.07E-74  | Probable multidrug resistance-associated protein lethal;              |
| Px009287.1 | 2.4027 | 1.27E-279 | 5.09E-278 | Trypsin CFT-1; similar with TRYP_CHOFU;                               |
| Px000111.1 | 2.3992 | 3.43E-15  | 1.98E-14  | Unknown function                                                      |
| Px001189.1 | 2.3992 | 3.96E-06  | 1.33E-05  | Phospholipase D3; similar with PLD3_XENLA;                            |
| Px006226.1 | 2.3992 | 1.06E-04  | 3.06E-04  | Calpain-C; similar with CANC_DROME;                                   |
| Px003467.1 | 2.3876 | 2.10E-18  | 1.36E-17  | Matrix metalloproteinase-14; similar with MMP14_RABIT;                |
| Px009395.1 | 2.3871 | 1.03E-17  | 6.47E-17  | Proclotting enzyme; similar with PCE_TACTR;                           |
| Px003761.3 | 2.3858 | 4.84E-205 | 1.52E-203 | Endoribonuclease Dicer; similar with DICER_BOVIN;                     |
| Px007764.1 | 2.3822 | 1.77E-173 | 4.99E-172 | Cytochrome c oxidase subunit 6A1, mitochondrial;                      |
| Px007616.1 | 2.3746 | 1.09E-158 | 2.87E-157 | Trypsin CFT-1; similar with TRYP_CHOFU;                               |
| Px013390.1 | 2.3727 | 1.05E-08  | 4.33E-08  | NADH dehydrogenase [ubiquinone] iron-sulfur protein 3, mitochondrial; |
| Px002209.3 | 2.3727 | 4.22E-16  | 2.54E-15  | Dynein heavy chain 1, axonemal; similar with DYH1_RAT;                |
| Px001708.1 | 2.3708 | 0.00E+00  | 0.00E+00  | Aminopeptidase N; similar with AMPN_PLUXY;                            |
| Px005242.1 | 2.3668 | 2.59E-19  | 1.73E-18  | Trypsin CFT-1; similar with TRYP_CHOFU;                               |
| Px004327.1 | 2.3658 | 1.41E-24  | 1.08E-23  | Glyceraldehyde-3-phosphate dehydrogenase 2;                           |
| Px004752.1 | 2.3527 | 0.00E+00  | 0.00E+00  | Pancreatic lipase-related protein 2;                                  |
| Px003335.1 | 2.3461 | 5.65E-140 | 1.34E-138 | Testis-specific serine/threonine-protein kinase 1;                    |
| Px002589.1 | 2.3435 | 3.45E-96  | 6.29E-95  | Trypsin, alkaline A; similar with TRYA_MANSE;                         |
| Px004218.1 | 2.3409 | 0.00E+00  | 0.00E+00  | Sucrose-6-phosphate hydrolase;                                        |
| Px015275.1 | 2.3286 | 0.00E+00  | 0.00E+00  | Trypsin CFT-1; similar with TRYP_CHOFU;                               |
| Px001761.1 | 2.3229 | 1.01E-228 | 3.51E-227 | Sucrose-6-phosphate hydrolase;                                        |
| Px015898.1 | 2.3215 | 0.00E+00  | 0.00E+00  | Putative farnesoic acid O-methyl transferase;                         |
| Px001705.1 | 2.3213 | 0.00E+00  | 0.00E+00  | Membrane alanyl aminopeptidase;                                       |
| Px005876.1 | 2.3107 | 8.18E-70  | 1.20E-68  | Patatin-like phospholipase domain-containing protein 2;               |
| Px007688.3 | 2.3038 | 8.95E-17  | 5.49E-16  | Molybdenum cofactor sulfurase;                                        |
| Px015631.1 | 2.2963 | 1.88E-38  | 1.89E-37  | Glutathione S-transferase 1; similar with GSTT1_MUSDO;                |
| Px009642.2 | 2.2874 | 7.41E-37  | 7.24E-36  | Unknown function                                                      |
| Px011160.1 | 2.2730 | 0.00E+00  | 0.00E+00  | Lactase-phlorizin hydrolase; similar with LPH_HUMAN;                  |
| Px006622.3 | 2.2728 | 9.45E-20  | 6.46E-19  | Ovochymase-1; similar with OVCH1_HUMAN;                               |
| Px007331.1 | 2.2718 | 1.93E-58  | 2.49E-57  | Ovarian-specific serine/threonine-protein kinase Lok;                 |
| Px001275.1 | 2.2595 | 6.17E-09  | 2.59E-08  | Probable multidrug resistance-associated protein lethal;              |
| Px002795.1 | 2.2574 | 1.02E-55  | 1.28E-54  | Laccase-4; similar with LAC4_TRAVE;                                   |
| Px009567.1 | 2.2552 | 3.00E-104 | 5.83E-103 | Trypsin, alkaline B; similar with TRYB_MANSE;                         |
| Px005211.1 | 2.2472 | 4.52E-07  | 1.65E-06  | Tyrocidine synthase 3; similar with TYCC_BREPA;                       |
| Px008810.1 | 2.2431 | 1.22E-23  | 9.18E-23  | Probable tubulin polyglutamylase TTL1;                                |

|            |        |           |           |                                                                         |
|------------|--------|-----------|-----------|-------------------------------------------------------------------------|
| Px002576.1 | 2.2413 | 7.31E-79  | 1.17E-77  | Leucine-rich repeats and immunoglobulin-like domains protein 2;         |
| Px007360.3 | 2.2294 | 2.18E-223 | 7.44E-222 | 3-phosphoinositide-dependent protein kinase 1;                          |
| Px001990.2 | 2.2289 | 2.92E-104 | 5.69E-103 | Carboxypeptidase B; similar with CBPB_ASTFL;                            |
| Px009566.1 | 2.2251 | 1.29E-259 | 4.84E-258 | Trypsin, alkaline C; similar with TRYC_MANSE;                           |
| Px006265.1 | 2.2241 | 3.46E-05  | 1.06E-04  | Alpha-tocopherol transfer protein-like;                                 |
| Px001633.1 | 2.2212 | 3.10E-80  | 5.00E-79  | Angiotensin-converting enzyme;                                          |
| Px007927.1 | 2.2154 | 4.79E-60  | 6.34E-59  | V-type proton ATPase subunit G;                                         |
| Px010612.1 | 2.1991 | 5.97E-76  | 9.32E-75  | Serine/arginine repetitive matrix protein 5;                            |
| Px008913.1 | 2.1926 | 0.00E+00  | 0.00E+00  | Acetylcholinesterase; similar with ACES_CULPI;                          |
| Px000771.1 | 2.1857 | 1.04E-117 | 2.18E-116 | Trypsin CFT-1; similar with TRYP_CHOFU;                                 |
| Px001878.1 | 2.1781 | 2.23E-21  | 1.59E-20  | Lysosomal Pro-X carboxypeptidase;                                       |
| Px004946.1 | 2.1753 | 3.57E-18  | 2.30E-17  | ATP synthase subunit gamma, mitochondrial;                              |
| Px011886.1 | 2.1750 | 1.89E-125 | 4.14E-124 | Trypsin CFT-1; similar with TRYP_CHOFU;                                 |
| Px006319.1 | 2.1734 | 2.37E-82  | 3.89E-81  | Retinol dehydrogenase 11; similar with RDH11_HUMAN;                     |
| Px018023.1 | 2.1708 | 1.08E-51  | 1.30E-50  | Adenylate kinase isoenzyme 1;                                           |
| Px016488.1 | 2.1647 | 1.18E-09  | 5.22E-09  | Glucose dehydrogenase [acceptor];                                       |
| Px010816.1 | 2.1582 | 5.02E-08  | 1.97E-07  | E3 ubiquitin-protein ligase MARCH2; ;                                   |
| Px008152.2 | 2.1559 | 5.44E-31  | 4.83E-30  | Alpha-1,6-mannosyl-glycoprotein 2-beta-N-acetylglucosaminyltransferase; |
| Px002652.1 | 2.1520 | 2.76E-25  | 2.16E-24  | Aryl hydrocarbon receptor; similar with AHR_MUSSP;                      |
| Px010079.1 | 2.1426 | 1.30E-95  | 2.36E-94  | Glutamine synthetase 1, mitochondrial;                                  |
| Px005902.4 | 2.1318 | 2.80E-119 | 5.89E-118 | Cytochrome P450 6B6; similar with CP6B6_HELAM;                          |
| Px003273.1 | 2.1129 | 6.40E-16  | 3.82E-15  | Pancreatic lipase-related protein 2;                                    |
| Px009347.1 | 2.1107 | 3.40E-32  | 3.07E-31  | Protein shuttle craft; similar with STC_DROME;                          |
| Px008811.1 | 2.1078 | 3.17E-18  | 2.04E-17  | Probable tubulin polyglutamylase TLL1;                                  |
| Px004854.1 | 2.1011 | 1.06E-15  | 6.27E-15  | Ecdysteroid UDP-glucosyltransferase;                                    |
| Px011567.1 | 2.0952 | 7.54E-11  | 3.57E-10  | Glucose dehydrogenase [acceptor];                                       |
| Px011501.1 | 2.0881 | 7.26E-17  | 4.47E-16  | ATP synthase subunit beta, mitochondrial;                               |
| Px010067.1 | 2.0773 | 6.13E-06  | 2.03E-05  | Glutamine-rich protein 2; similar with E2A5X5_9HYME;                    |
| Px002188.1 | 2.0773 | 1.67E-04  | 4.71E-04  | Optomotor-blind protein; similar with OMB_DROME;                        |
| Px011796.5 | 2.0740 | 1.05E-51  | 1.26E-50  | Putative aminopeptidase W07G4.4;                                        |
| Px009703.1 | 2.0631 | 0.00E+00  | 0.00E+00  | Beta-1,3-glucan-binding protein;                                        |
| Px004200.1 | 2.0610 | 1.11E-81  | 1.81E-80  | Putative phosphatidate phosphatase;                                     |
| Px016550.6 | 2.0608 | 2.43E-11  | 1.19E-10  | Probable L-asparaginase GA20639;                                        |
| Px001833.1 | 2.0603 | 0.00E+00  | 0.00E+00  | Serine protease easter; similar with EAST_DROME;                        |
| Px002382.1 | 2.0597 | 1.62E-130 | 3.62E-129 | Myosin-VIIa; similar with MYO7A_AEDAE;                                  |
| Px006500.1 | 2.0492 | 9.92E-42  | 1.05E-40  | Peroxisomal acyl-coenzyme A oxidase 3;                                  |
| Px007402.1 | 2.0481 | 1.63E-12  | 8.38E-12  | Dephospho-CoA kinase domain-containing protein;                         |
| Px002632.1 | 2.0480 | 2.47E-165 | 6.70E-164 | Xaa-Pro dipeptidase; similar with PEPD_HUMAN;                           |
| Px011307.1 | 2.0469 | 2.97E-33  | 2.74E-32  | Poly(A) polymerase gamma;                                               |
| Px004167.1 | 2.0469 | 1.15E-06  | 4.06E-06  | Plasma kallikrein; similar with KLKB1_MOUSE;                            |
| Px006763.1 | 2.0407 | 1.02E-05  | 3.30E-05  | Peroxisomal acyl-coenzyme A oxidase 3;                                  |
| Px016844.1 | 2.0366 | 3.06E-05  | 9.40E-05  | Proteasome subunit beta type-1; similar with PSB1_RAT;                  |
| Px002985.1 | 2.0315 | 9.20E-05  | 2.68E-04  | Uncharacterized protein YJR142W; similar with YJ9J_YEAST;               |
| Px011034.1 | 2.0305 | 3.34E-62  | 4.54E-61  | Lysosomal alpha-glucosidase; similar with LYAG_PONAB;                   |
| Px011280.1 | 2.0291 | 2.23E-60  | 2.97E-59  | 4-coumarate--CoA ligase 1; similar with 4CL1_TOBAC;                     |
| Px012569.1 | 2.0285 | 0.00E+00  | 0.00E+00  | Trypsin, alkaline C; similar with TRYC_MANSE;                           |
| Px010481.1 | 2.0283 | 7.38E-08  | 2.86E-07  | Tctex1 domain-containing protein 3;                                     |
| Px015936.1 | 2.0166 | 0.00E+00  | 0.00E+00  | Putative uncharacterized protein;                                       |
| Px009283.1 | 2.0101 | 5.66E-06  | 1.88E-05  | Decaprenyl-diphosphate synthase subunit 1;                              |
| Px004726.1 | 2.0010 | 1.03E-29  | 8.97E-29  | Alpha, alpha-trehalose-phosphate synthase [UDP-forming] 56 kDa subunit; |
| Px005079.1 | 1.9962 | 0.00E+00  | 0.00E+00  | Lactase-phlorizin hydrolase; similar with LPH_HUMAN;                    |
| Px001161.1 | 1.9925 | 6.56E-100 | 1.24E-98  | Superoxide dismutase [Cu-Zn];                                           |
| Px013789.1 | 1.9877 | 3.65E-89  | 6.34E-88  | L-threonine 3-dehydrogenase;                                            |
| Px012400.1 | 1.9673 | 6.21E-38  | 6.19E-37  | Argininosuccinate lyase; similar with ARLY2_ANAPL;                      |

|            |        |           |           |                                                                          |
|------------|--------|-----------|-----------|--------------------------------------------------------------------------|
| Px012570.1 | 1.9654 | 0.00E+00  | 0.00E+00  | Trypsin CFT-1; similar with TRYP_CHOFU;                                  |
| Px006403.1 | 1.9489 | 1.14E-19  | 7.74E-19  | Prostaglandin reductase 1; similar with PTGR1_BOVIN;                     |
| Px003725.1 | 1.9489 | 6.60E-74  | 1.01E-72  | Interleukin-1 receptor-associated kinase 4;                              |
| Px011097.1 | 1.9460 | 2.65E-10  | 1.22E-09  | Serine proteinase stubble; similar with STUB_DROME;                      |
| Px001111.1 | 1.9440 | 1.54E-14  | 8.66E-14  | Probable multidrug resistance-associated protein lethal;                 |
| Px000116.1 | 1.9398 | 7.72E-10  | 3.45E-09  | Protein phosphatase 1E; similar with PPM1E_RAT;                          |
| Px007071.1 | 1.9352 | 2.52E-04  | 6.90E-04  | Histone-lysine N-methyltransferase Suv4-20;                              |
| Px006941.1 | 1.9351 | 4.59E-121 | 9.83E-120 | Myrosinase 1; similar with MYRO1_BREBR;                                  |
| Px008153.1 | 1.9344 | 1.29E-24  | 9.93E-24  | Alpha-1,6-mannosyl-glycoprotein 2-beta-N-acetylglucosaminyltransferase;  |
| Px002889.1 | 1.9297 | 3.44E-08  | 1.36E-07  | Dynein beta chain, ciliary; similar with DYHC_TRIGR;                     |
| Px004751.1 | 1.9293 | 0.00E+00  | 0.00E+00  | Pancreatic triacylglycerol lipase;                                       |
| Px002827.2 | 1.9253 | 4.57E-05  | 1.38E-04  | Leucine-rich repeat serine/threonine-protein kinase 1;                   |
| Px015380.1 | 1.9245 | 1.43E-39  | 1.47E-38  | Acyl-CoA Delta(11) desaturase; similar with ACO11_TRINI;                 |
| Px003754.1 | 1.9228 | 1.67E-147 | 4.13E-146 | Membrane alanyl aminopeptidase;                                          |
| Px017171.1 | 1.9108 | 8.59E-16  | 5.10E-15  | Putative inositol monophosphatase 3;                                     |
| Px014216.1 | 1.9094 | 1.32E-40  | 1.38E-39  | Cytochrome P450 6B6; similar with CP6B6_HELAM;                           |
| Px012937.2 | 1.8846 | 1.37E-05  | 4.37E-05  | Phospholipase D1; similar with PLD1_HUMAN;                               |
| Px006956.1 | 1.8788 | 1.02E-112 | 2.08E-111 | Xaa-Pro dipeptidase; similar with PEPD_HUMAN;                            |
| Px000872.2 | 1.8756 | 1.82E-09  | 7.93E-09  | Ecdysteroid UDP-glucosyltransferase;                                     |
| Px000394.1 | 1.8666 | 1.72E-210 | 5.53E-209 | Alpha-amylase 4N; similar with AM4N_DROAN;                               |
| Px002866.1 | 1.8658 | 5.28E-09  | 2.23E-08  | Trypsin, alkaline A; similar with TRYA_MANSE;                            |
| Px008406.1 | 1.8639 | 2.77E-08  | 1.10E-07  | Serine proteinase stubble; similar with STUB_DROME;                      |
| Px004577.1 | 1.8549 | 4.19E-18  | 2.69E-17  | Phosphotriesterase-related protein;                                      |
| Px007992.2 | 1.8540 | 1.63E-24  | 1.25E-23  | Multidrug resistance protein homolog 49;                                 |
| Px013665.3 | 1.8475 | 2.46E-37  | 2.43E-36  | Collagenase; similar with COGS_HYPLI;                                    |
| Px016835.1 | 1.8438 | 7.68E-29  | 6.55E-28  | Inositol polyphosphate multikinase;                                      |
| Px004611.1 | 1.8428 | 1.21E-04  | 3.46E-04  | Katanin p60 ATPase-containing subunit A-like 1;                          |
| Px009920.1 | 1.8428 | 8.21E-15  | 4.67E-14  | Branched-chain-amino-acid aminotransferase, mitochondrial;               |
| Px005763.1 | 1.8391 | 4.70E-09  | 1.99E-08  | Fatty-acid amide hydrolase 2;                                            |
| Px005124.5 | 1.8306 | 2.07E-24  | 1.58E-23  | Transposon Ty3-I Gag-Pol polyprotein;                                    |
| Px000647.3 | 1.8232 | 6.21E-280 | 2.49E-278 | UDP-glucuronosyltransferase 2B7;                                         |
| Px010831.1 | 1.8205 | 7.51E-09  | 3.13E-08  | Luciferin 4-monooxygenase; similar with LUCI_PHOPE;                      |
| Px017172.1 | 1.8142 | 5.10E-12  | 2.56E-11  | Serine palmitoyltransferase 1;                                           |
| Px002968.1 | 1.8131 | 5.34E-41  | 5.58E-40  | Adenylate kinase isoenzyme 1;                                            |
| Px007409.1 | 1.8110 | 8.48E-30  | 7.38E-29  | Succinate dehydrogenase [ubiquinone] iron-sulfur subunit, mitochondrial; |
| Px009194.1 | 1.8005 | 8.55E-179 | 2.46E-177 | Dihydropteridine reductase;                                              |
| Px016270.1 | 1.7997 | 7.53E-11  | 3.57E-10  | Histone deacetylase 3; similar with HDAC3_TETNG;                         |
| Px015779.1 | 1.7984 | 0.00E+00  | 0.00E+00  | Fatty-acid amide hydrolase 2;                                            |
| Px008457.1 | 1.7972 | 1.09E-06  | 3.86E-06  | Carbohydrate sulfotransferase 13;                                        |
| Px003540.1 | 1.7898 | 3.78E-38  | 3.78E-37  | Hexokinase type 2; similar with HXK2_DROME;                              |
| Px013655.1 | 1.7878 | 3.45E-08  | 1.37E-07  | Chitotriosidase-1; similar with CHIT1_HUMAN;                             |
| Px004684.1 | 1.7858 | 0.00E+00  | 0.00E+00  | Tyrosine 3-monooxygenase; similar with TY3H_DROME;                       |
| Px014984.1 | 1.7851 | 2.81E-15  | 1.63E-14  | Cytochrome P450; similar with B5TVL6_PLUXY;                              |
| Px011697.1 | 1.7841 | 4.24E-28  | 3.56E-27  | Bifunctional methylenetetrahydrofolate dehydrogenase/cyclohydrolase;     |
| Px008505.1 | 1.7699 | 2.97E-27  | 2.45E-26  | Glucose dehydrogenase [acceptor];                                        |
| Px012329.1 | 1.7693 | 5.39E-84  | 8.95E-83  | Serine protease persephone; similar with PSH_DROME;                      |
| Px002295.1 | 1.7684 | 0.00E+00  | 0.00E+00  | Pancreatic lipase-related protein 2;                                     |
| Px015778.1 | 1.7676 | 5.49E-08  | 2.14E-07  | Sentrin-specific protease 8; similar with SENP8_HUMAN;                   |
| Px012643.1 | 1.7650 | 5.67E-95  | 1.02E-93  | Angiotensin-converting enzyme;                                           |
| Px015449.1 | 1.7626 | 1.93E-12  | 9.88E-12  | Acetyl-CoA carboxylase 1; similar with ACACA_SHEEP;                      |
| Px000123.1 | 1.7598 | 0.00E+00  | 0.00E+00  | Putative aldehyde dehydrogenase family 7 member A1 homolog;              |
| Px003753.1 | 1.7587 | 0.00E+00  | 0.00E+00  | Membrane alanyl aminopeptidase;                                          |
| Px004725.1 | 1.7553 | 9.24E-06  | 3.01E-05  | ATP-binding cassette sub-family G member 1;                              |
| Px017680.3 | 1.7524 | 1.24E-28  | 1.06E-27  | CaiB/baiF CoA-transferase family protein C7orf10 homolog;                |

|            |        |           |           |                                                                         |
|------------|--------|-----------|-----------|-------------------------------------------------------------------------|
| Px008938.1 | 1.7508 | 1.35E-30  | 1.19E-29  | Carboxypeptidase D; similar with CBPD_DROME;                            |
| Px014955.1 | 1.7471 | 5.65E-27  | 4.64E-26  | ABC transporter G family member 23;                                     |
| Px011231.1 | 1.7453 | 1.76E-27  | 1.46E-26  | Protein unc-50 homolog; similar with UNC50_DROME;                       |
| Px014078.1 | 1.7425 | 5.92E-30  | 5.19E-29  | Fructose-bisphosphate aldolase; similar with ALF_DROME;                 |
| Px010017.1 | 1.7418 | 0.00E+00  | 0.00E+00  | Carboxypeptidase B; similar with CBPB_ASTFL;                            |
| Px009015.1 | 1.7327 | 5.76E-172 | 1.61E-170 | Testis-specific serine/threonine-protein kinase 4;                      |
| Px000957.1 | 1.7245 | 2.09E-58  | 2.70E-57  | Putative lipoyltransferase 2, mitochondrial;                            |
| Px009343.1 | 1.7147 | 2.39E-06  | 8.20E-06  | NADH-ubiquinone oxidoreductase 75 kDa subunit, mitochondrial;           |
| Px000844.1 | 1.7136 | 3.72E-14  | 2.07E-13  | Ribosomal protein S6 kinase delta-1;                                    |
| Px011320.1 | 1.7053 | 2.69E-04  | 7.34E-04  | Cytochrome b-c1 complex subunit Rieske, mitochondrial;                  |
| Px015730.1 | 1.7021 | 0.00E+00  | 0.00E+00  | Apolipoporphins; similar with APLP_MANSE;                               |
| Px004446.3 | 1.6970 | 2.01E-45  | 2.23E-44  | Copper-transporting ATPase 2; similar with ATP7B_MOUSE;                 |
| Px005689.1 | 1.6962 | 5.99E-09  | 2.52E-08  | Peptidylglycine alpha-hydroxylating monooxygenase;                      |
| Px005403.1 | 1.6902 | 6.87E-06  | 2.26E-05  | Probable multidrug resistance-associated protein lethal;                |
| Px001113.1 | 1.6873 | 1.59E-11  | 7.83E-11  | Ecdysteroid UDP-glucosyltransferase;                                    |
| Px000402.2 | 1.6821 | 5.77E-83  | 9.50E-82  | Serine protease persephone; similar with PSH_DROME;                     |
| Px008154.1 | 1.6773 | 3.06E-26  | 2.46E-25  | Alpha-1,6-mannosyl-glycoprotein 2-beta-N-acetylglucosaminyltransferase; |
| Px007305.1 | 1.6562 | 9.37E-42  | 9.88E-41  | C-1-tetrahydrofolate synthase, cytoplasmic;                             |
| Px003771.1 | 1.6556 | 6.82E-20  | 4.67E-19  | ATP synthase subunit s, mitochondrial;                                  |
| Px004798.2 | 1.6515 | 1.57E-68  | 2.27E-67  | Malate dehydrogenase, mitochondrial;                                    |
| Px003712.1 | 1.6490 | 1.05E-19  | 7.17E-19  | Acetylcholinesterase; similar with ACES_CULPI;                          |
| Px006502.1 | 1.6424 | 1.34E-55  | 1.68E-54  | Calpain-B; similar with CANB_DROME;                                     |
| Px005342.1 | 1.6408 | 3.80E-156 | 9.82E-155 | Collagenase; similar with COGS_HYPLI;                                   |
| Px009087.2 | 1.6281 | 1.83E-240 | 6.53E-239 | Coagulation factor XII; similar with FA12_CAVPO;                        |
| Px008070.1 | 1.6216 | 3.59E-04  | 9.63E-04  | Peroxisomal leader peptide-processing protease;                         |
| Px004065.1 | 1.6192 | 1.53E-09  | 6.71E-09  | Mannosyl-oligosaccharide alpha-1,2-mannosidase isoform A;               |
| Px007904.1 | 1.6124 | 0.00E+00  | 0.00E+00  | Collagenase; similar with COGS_HYPLI;                                   |
| Px002015.1 | 1.6107 | 7.78E-06  | 2.55E-05  | AGAP008123-PA; similar with Q7Q401_ANOGA;                               |
| Px016278.1 | 1.6052 | 1.76E-11  | 8.64E-11  | Cytoplasmic aconitate hydratase;                                        |
| Px007111.3 | 1.6050 | 2.44E-116 | 5.04E-115 | ER degradation-enhancing alpha-mannosidase-like 2;                      |
| Px002919.1 | 1.6022 | 2.42E-22  | 1.76E-21  | Putative N-acetylglucosamine-6-phosphate deacetylase;                   |
| Px009715.1 | 1.5988 | 8.85E-16  | 5.24E-15  | Mitochondrial inner membrane protease subunit 1;                        |
| Px013783.3 | 1.5951 | 1.97E-06  | 6.85E-06  | Methyltransferase-like protein 14 homolog;                              |
| Px004643.1 | 1.5882 | 6.58E-06  | 2.17E-05  | Cytochrome P450 6B6; similar with CP6B6_HELAM;                          |
| Px000132.1 | 1.5866 | 3.04E-79  | 4.87E-78  | FGGY carbohydrate kinase domain-containing protein;                     |
| Px011340.1 | 1.5860 | 0.00E+00  | 0.00E+00  | Non-specific lipid-transfer protein;                                    |
| Px005490.1 | 1.5819 | 5.31E-62  | 7.19E-61  | Inhibitor of nuclear factor kappa-B kinase subunit beta;                |
| Px016731.1 | 1.5768 | 2.81E-27  | 2.33E-26  | Acyl-CoA synthetase family member 3, mitochondrial;                     |
| Px015306.1 | 1.5761 | 1.08E-11  | 5.34E-11  | 1,2-dihydroxy-3-keto-5-methylthiopentene dioxygenase;                   |
| Px013162.1 | 1.5740 | 7.41E-151 | 1.88E-149 | Serine protease snake; similar with SNAK_DROME;                         |
| Px017275.1 | 1.5732 | 4.40E-10  | 1.99E-09  | Inositol monophosphatase 3;                                             |
| Px006124.1 | 1.5716 | 2.01E-24  | 1.53E-23  | Tubulin alpha-2/alpha-4 chain;                                          |
| Px001531.1 | 1.5708 | 7.84E-60  | 1.04E-58  | Probable peroxisomal acyl-coenzyme A oxidase 1;                         |
| Px016564.1 | 1.5653 | 3.09E-27  | 2.55E-26  | Hydroxyacyl-coenzyme A dehydrogenase, mitochondrial;                    |
| Px002826.2 | 1.5627 | 1.01E-05  | 3.28E-05  | CTD small phosphatase-like protein 2;                                   |
| Px008540.1 | 1.5543 | 2.19E-09  | 9.49E-09  | Unknown function                                                        |
| Px005340.1 | 1.5499 | 1.24E-139 | 2.94E-138 | Collagenase; similar with COGS_HYPLI;                                   |
| Px012743.1 | 1.5433 | 6.47E-14  | 3.55E-13  | Probable dolichol-phosphate mannosyltransferase;                        |
| Px014172.1 | 1.5367 | 3.01E-07  | 1.11E-06  | Heparanase; similar with HPSE_BOVIN;                                    |
| Px010498.1 | 1.5315 | 2.77E-59  | 3.62E-58  | Fumarylacetoacetate hydrolase domain-containing protein 2               |
| Px001106.1 | 1.5290 | 1.97E-08  | 7.95E-08  | Protein retinal degeneration B;                                         |
| Px010148.3 | 1.5270 | 0.00E+00  | 0.00E+00  | Putative uncharacterized protein;                                       |
| Px003277.1 | 1.5220 | 5.21E-05  | 1.56E-04  | Dual specificity tyrosine-phosphorylation-regulated kinase 2;           |
| Px013958.1 | 1.5211 | 6.83E-145 | 1.68E-143 | Cytochrome P450 6k1; similar with CP6K1_BLAGE;                          |



|            |        |           |           |                                                       |
|------------|--------|-----------|-----------|-------------------------------------------------------|
| Px007047.2 | 1.5134 | 9.55E-05  | 2.77E-04  | Probable peroxisomal acyl-coenzyme A oxidase 1;       |
| Px016262.1 | 1.5084 | 3.45E-19  | 2.30E-18  | Cysteine sulfinic acid decarboxylase;                 |
| Px008849.1 | 1.5018 | 7.18E-50  | 8.45E-49  | Myosinase 1; similar with MYRO1_BREBR;                |
| Px003229.1 | 1.5011 | 1.66E-09  | 7.28E-09  | Dynein heavy chain 5, axonemal;                       |
| Px005265.1 | 1.4972 | 1.16E-08  | 4.78E-08  | Ubiquitin carboxyl-terminal hydrolase 6;              |
| Px006995.1 | 1.4923 | 7.94E-05  | 2.33E-04  | Polypeptide N-acetylgalactosaminyltransferase 1;      |
| Px016677.1 | 1.4862 | 1.49E-136 | 3.44E-135 | ATP-binding cassette sub-family G member 1;           |
| Px004945.1 | 1.4848 | 1.39E-157 | 3.62E-156 | Protein henna; similar with PH4H_DROME;               |
| Px011686.1 | 1.4813 | 2.69E-20  | 1.86E-19  | 5-formyltetrahydrofolate cyclo-ligase;                |
| Px013984.1 | 1.4786 | 1.70E-11  | 8.37E-11  | Dynein heavy chain 8, axonemal; s                     |
| Px003016.1 | 1.4735 | 1.08E-46  | 1.22E-45  | Tyrosine-protein kinase HTK16;                        |
| Px013714.1 | 1.4732 | 6.59E-05  | 1.95E-04  | Putative serine/threonine-protein kinase C05D10.2;    |
| Px002706.1 | 1.4721 | 0.00E+00  | 0.00E+00  | Lysozyme; similar with LYS_TRINI;                     |
| Px017858.1 | 1.4719 | 1.07E-34  | 1.01E-33  | ATP-binding cassette sub-family G member 1;           |
| Px011489.1 | 1.4705 | 1.48E-69  | 2.16E-68  | Gamma-glutamyl hydrolase A;                           |
| Px005954.1 | 1.4684 | 8.08E-13  | 4.22E-12  | UDP-glucose:glycoprotein glucosyltransferase;         |
| Px011338.1 | 1.4635 | 5.55E-12  | 2.79E-11  | GTP cyclohydrolase 1; similar with GCH1_DROME;        |
| Px014982.1 | 1.4635 | 0.00E+00  | 0.00E+00  | Probable cytochrome P450 9f2;                         |
| Px000965.1 | 1.4634 | 3.13E-36  | 3.03E-35  | D-amino-acid oxidase 2;                               |
| Px015886.1 | 1.4619 | 1.21E-04  | 3.45E-04  | ATP-dependent DNA helicase Q5;                        |
| Px013203.1 | 1.4517 | 2.86E-06  | 9.77E-06  | UDP-glucuronosyltransferase 2B2;                      |
| Px000855.1 | 1.4469 | 1.40E-135 | 3.22E-134 | Juvenile hormone epoxide hydrolase;                   |
| Px014831.2 | 1.4467 | 0.00E+00  | 0.00E+00  | Serine proteinase stubble; similar with STUB_DROME;   |
| Px014586.1 | 1.4462 | 1.33E-30  | 1.17E-29  | Tubulointerstitial nephritis antigen;                 |
| Px007510.1 | 1.4398 | 3.94E-10  | 1.80E-09  | Spectrin beta chain; similar with SPTCB_DROME;        |
| Px001349.1 | 1.4343 | 2.79E-14  | 1.56E-13  | Myosin-IIIa; similar with MYO3A_HUMAN;                |
| Px015740.3 | 1.4224 | 8.84E-08  | 3.41E-07  | Endoribonuclease Dcr-1; similar with DCR1_DROME;      |
| Px008607.1 | 1.4201 | 1.74E-29  | 1.51E-28  | Ras-related protein Rap-2b; similar with RAP2B_RAT;   |
| Px017644.1 | 1.4197 | 3.55E-06  | 1.20E-05  | Dynein heavy chain 10, axonemal;                      |
| Px013053.1 | 1.4168 | 5.05E-81  | 8.20E-80  | Endoribonuclease Dicer; similar with DICER_MOUSE;     |
| Px010627.1 | 1.4167 | 1.53E-153 | 3.89E-152 | Wing disc-specific protein;                           |
| Px008806.2 | 1.4150 | 2.28E-44  | 2.49E-43  | Hydroxyacylglutathione hydrolase, mitochondrial;      |
| Px007577.1 | 1.4133 | 8.83E-12  | 4.40E-11  | Protein N-terminal asparagine amidohydrolase;         |
| Px009011.1 | 1.4129 | 6.79E-05  | 2.01E-04  | Tyrosine-protein kinase hopscotch;                    |
| Px005726.1 | 1.4124 | 1.92E-12  | 9.85E-12  | Xaa-Pro aminopeptidase 1; similar with XPP1_HUMAN;    |
| Px016080.1 | 1.4117 | 3.08E-05  | 9.48E-05  | Glucosamine-6-phosphate isomerase;                    |
| Px011844.1 | 1.4117 | 3.08E-05  | 9.48E-05  | Adenylate kinase 7; similar with KAD7_MOUSE;          |
| Px011611.1 | 1.4113 | 0.00E+00  | 0.00E+00  | Probable enoyl-CoA hydratase, mitochondrial;          |
| Px016914.1 | 1.4109 | 6.83E-63  | 9.40E-62  | Sarcoplasmic calcium-binding protein;                 |
| Px008591.1 | 1.4098 | 1.56E-10  | 7.26E-10  | Hexosaminidase D; similar with HEXDC_HUMAN;           |
| Px006720.1 | 1.4070 | 1.32E-07  | 5.02E-07  | Glycerol-3-phosphate acyltransferase 4;               |
| Px013538.1 | 1.4047 | 8.56E-19  | 5.64E-18  | 2-oxoglutarate dehydrogenase, mitochondrial;          |
| Px012191.1 | 1.4028 | 2.38E-208 | 7.61E-207 | Sodium/potassium-transporting ATPase subunit alpha-1; |
| Px005747.1 | 1.4025 | 6.57E-16  | 3.92E-15  | Proteasome subunit alpha type-5;                      |
| Px003398.1 | 1.3992 | 2.33E-08  | 9.33E-08  | Probable phospholipid-transporting ATPase IA;         |
| Px009568.1 | 1.3992 | 1.23E-04  | 3.53E-04  | Trypsin, alkaline C; similar with TRYC_MANSE;         |
| Px017669.1 | 1.3964 | 2.24E-18  | 1.45E-17  | 2-hydroxyacyl-CoA lyase 1;                            |
| Px001847.1 | 1.3803 | 1.09E-180 | 3.16E-179 | Aminoacylase-1; similar with ACY1_MOUSE;              |
| Px005341.1 | 1.3783 | 1.92E-45  | 2.13E-44  | Collagenase; similar with COGS_HYPLI;                 |
| Px001370.1 | 1.3780 | 6.09E-19  | 4.04E-18  | Aminoacylase-1; similar with ACY1_MOUSE;              |
| Px013252.1 | 1.3766 | 0.00E+00  | 0.00E+00  | Calexcitin-2; similar with CEX2_CAEEL;                |
| Px004590.1 | 1.3727 | 8.33E-05  | 2.43E-04  | Dynein heavy chain 7, axonemal;                       |
| Px000087.2 | 1.3668 | 5.17E-07  | 1.88E-06  | ATP-binding cassette sub-family G member 4;           |
| Px009062.1 | 1.3641 | 3.11E-05  | 9.55E-05  | Probable cytochrome P450 304a1;                       |

|            |        |           |           |                                                                          |
|------------|--------|-----------|-----------|--------------------------------------------------------------------------|
| Px005329.1 | 1.3592 | 4.00E-66  | 5.66E-65  | Protein ETHE1, mitochondrial;                                            |
| Px012976.1 | 1.3549 | 1.30E-32  | 1.19E-31  | Sulfiredoxin-1; similar with SRXN1_MOUSE;                                |
| Px009798.1 | 1.3537 | 1.57E-40  | 1.63E-39  | Aminoacylase-1A; similar with ACY1A_RAT;                                 |
| Px000146.1 | 1.3503 | 5.61E-05  | 1.68E-04  | Adenylate cyclase type 9; similar with ADCY9_HUMAN;                      |
| Px006663.1 | 1.3501 | 2.50E-38  | 2.52E-37  | Ribonuclease Oy; similar with RNOY_CRAGI;                                |
| Px010161.1 | 1.3476 | 3.12E-26  | 2.50E-25  | GTP cyclohydrolase 1; similar with GCH1_DROME;                           |
| Px016171.2 | 1.3471 | 1.79E-54  | 2.21E-53  | Prolyl endopeptidase; similar with PPCE_MOUSE;                           |
| Px012630.1 | 1.3430 | 4.20E-41  | 4.40E-40  | Tribbles homolog 2; similar with TRIB2_MOUSE;                            |
| Px007369.1 | 1.3403 | 4.19E-08  | 1.65E-07  | DNA excision repair protein haywire;                                     |
| Px009117.1 | 1.3403 | 1.32E-09  | 5.80E-09  | Phosphotriesterase-related protein;                                      |
| Px000763.1 | 1.3380 | 2.84E-09  | 1.22E-08  | Acetyl-CoA carboxylase;                                                  |
| Px015923.1 | 1.3371 | 5.16E-07  | 1.88E-06  | OTU domain-containing protein 1;                                         |
| Px012027.3 | 1.3347 | 9.75E-93  | 1.73E-91  | Protein 5NUC; similar with 5NTD_LUTLO;                                   |
| Px008602.1 | 1.3331 | 2.87E-11  | 1.39E-10  | RING-box protein 2; similar with RBX2_HUMAN;                             |
| Px012523.1 | 1.3305 | 6.77E-16  | 4.04E-15  | Ras-related protein Rab-35; similar with RAB35_RAT;                      |
| Px001200.1 | 1.3269 | 1.44E-72  | 2.17E-71  | Electron transfer flavoprotein-ubiquinone oxidoreductase, mitochondrial; |
| Px003361.1 | 1.3252 | 8.90E-19  | 5.86E-18  | Cysteine protease ATG4D;                                                 |
| Px009776.1 | 1.3252 | 2.34E-08  | 9.36E-08  | Mevalonate kinase; similar with KIME_DICDI;                              |
| Px007906.2 | 1.3236 | 0.00E+00  | 0.00E+00  | Collagenase; similar with COGS_HYPLI;                                    |
| Px009982.1 | 1.3211 | 1.20E-43  | 1.30E-42  | 5-oxoprolinase; similar with OPLA_HUMAN;                                 |
| Px005295.1 | 1.3205 | 1.92E-08  | 7.76E-08  | Tyrosine-protein kinase Src64B;                                          |
| Px003782.1 | 1.3205 | 7.56E-110 | 1.51E-108 | Carboxypeptidase E; similar with CBPE_LOPAM;                             |
| Px009887.1 | 1.3111 | 4.97E-09  | 2.10E-08  | Probable protein phosphatase 2C T23F11.1;                                |
| Px016664.1 | 1.3099 | 2.71E-18  | 1.75E-17  | DNA replication complex GINS protein PSF1;                               |
| Px004571.1 | 1.3081 | 2.26E-185 | 6.68E-184 | Aldose reductase; similar with ALDR_BOVIN;                               |
| Px003168.1 | 1.3070 | 0.00E+00  | 0.00E+00  | Soma ferritin; similar with FRIS_LYMST;                                  |
| Px006106.1 | 1.3067 | 6.05E-183 | 1.77E-181 | Glutathione S-transferase 1;                                             |
| Px016456.1 | 1.3048 | 0.00E+00  | 0.00E+00  | Lambda-crystallin homolog;                                               |
| Px008217.3 | 1.3035 | 8.78E-09  | 3.64E-08  | Phosphatidylinositol 4,5-bisphosphate 5-phosphatase A;                   |
| Px000513.1 | 1.2987 | 1.37E-31  | 1.23E-30  | Teneurin-2; similar with TEN2_MOUSE;                                     |
| Px003149.1 | 1.2980 | 7.04E-19  | 4.66E-18  | SET domain-containing protein 4; similar with SETD4_MOUSE;               |
| Px016666.1 | 1.2974 | 6.21E-14  | 3.41E-13  | Sphingosine-1-phosphate phosphatase 1;                                   |
| Px011025.3 | 1.2894 | 1.82E-122 | 3.93E-121 | Protein yellow; similar with YELL_DROYA;                                 |
| Px004607.1 | 1.2880 | 1.91E-13  | 1.02E-12  | NEDD8-activating enzyme E1 catalytic subunit;                            |
| Px016679.1 | 1.2867 | 1.13E-05  | 3.64E-05  | ATP-binding cassette transporter subfamily G;                            |
| Px015448.1 | 1.2854 | 3.01E-05  | 9.28E-05  | Acetyl-CoA carboxylase; similar with ACAC_CHICK;                         |
| Px016834.1 | 1.2833 | 2.58E-98  | 4.76E-97  | Probable 3-hydroxyacyl-CoA dehydrogenase B0272.3;                        |
| Px008337.1 | 1.2761 | 1.16E-111 | 2.35E-110 | Leishmanolysin-like peptidase;                                           |
| Px016733.1 | 1.2758 | 1.82E-09  | 7.92E-09  | Acyl-CoA synthetase family member 3, mitochondrial;                      |
| Px006848.1 | 1.2745 | 1.88E-14  | 1.05E-13  | UDP-glucose 6-dehydrogenase;                                             |
| Px006311.1 | 1.2734 | 4.37E-18  | 2.80E-17  | Chorion peroxidase; similar with PERC_ANOGA;                             |
| Px001795.1 | 1.2730 | 9.10E-17  | 5.57E-16  | Ribosomal protein S6 kinase alpha-3;                                     |
| Px002115.1 | 1.2726 | 1.76E-36  | 1.71E-35  | 5-formyltetrahydrofolate cyclo-ligase;                                   |
| Px003167.1 | 1.2675 | 3.51E-157 | 9.10E-156 | Ferritin subunit; similar with FRI_AEDAE;                                |
| Px002715.1 | 1.2673 | 4.39E-154 | 1.12E-152 | Cathepsin L; similar with CATL_DROME;                                    |
| Px013837.1 | 1.2663 | 1.45E-04  | 4.10E-04  | Carnitine O-palmitoyltransferase 1, muscle isoform;                      |
| Px015426.1 | 1.2649 | 4.69E-13  | 2.48E-12  | MAP kinase-activated protein kinase 2;                                   |
| Px003365.1 | 1.2639 | 2.20E-57  | 2.82E-56  | Luciferin 4-monooxygenase; similar with LUCI_PHOPE;                      |
| Px000372.1 | 1.2617 | 2.59E-11  | 1.26E-10  | Putative gamma-glutamyltransferase ywrd;                                 |
| Px008334.1 | 1.2586 | 3.79E-49  | 4.42E-48  | Putative uncharacterized protein GLEAN_14945;                            |
| Px013298.1 | 1.2577 | 3.36E-51  | 4.02E-50  | Serine proteinase-like protein;                                          |
| Px001059.1 | 1.2567 | 2.89E-79  | 4.64E-78  | Beta-1,3-glucan-binding protein;                                         |
| Px002767.1 | 1.2554 | 0.00E+00  | 0.00E+00  | Spectrin alpha chain; similar with SPTCA_DROME;                          |
| Px010934.1 | 1.2536 | 9.95E-36  | 9.54E-35  | Vascular endothelial growth factor receptor 1;                           |

|            |        |           |           |                                                                           |
|------------|--------|-----------|-----------|---------------------------------------------------------------------------|
| Px013936.1 | 1.2531 | 1.39E-28  | 1.18E-27  | 3-ketoacyl-CoA thiolase, mitochondrial;                                   |
| Px003788.1 | 1.2526 | 4.81E-57  | 6.14E-56  | D-2-hydroxyglutarate dehydrogenase, mitochondrial;                        |
| Px007466.2 | 1.2506 | 2.64E-07  | 9.84E-07  | Glucose dehydrogenase [acceptor];                                         |
| Px010271.1 | 1.2456 | 5.38E-14  | 2.96E-13  | 2-acylglycerol O-acyltransferase 1;                                       |
| Px012993.1 | 1.2368 | 4.80E-99  | 8.92E-98  | Multifunctional protein ADE2;                                             |
| Px006054.1 | 1.2358 | 6.60E-273 | 2.59E-271 | Myrosinase 1; similar with MYRO1_BREBR;                                   |
| Px001277.2 | 1.2325 | 1.00E-06  | 3.55E-06  | Probable phospholipid-transporting ATPase IIB;                            |
| Px012877.1 | 1.2309 | 5.17E-17  | 3.21E-16  | Inositol oxygenase; similar with MIOX_DANRE;                              |
| Px006295.1 | 1.2186 | 2.27E-05  | 7.07E-05  | ATP-dependent RNA helicase DDX18;                                         |
| Px017253.1 | 1.2169 | 4.53E-37  | 4.47E-36  | Cytochrome P450 6B2; similar with CP6B2_HELAM;                            |
| Px011707.1 | 1.2143 | 2.86E-35  | 2.71E-34  | Amidophosphoribosyltransferase;                                           |
| Px007055.2 | 1.2138 | 3.00E-67  | 4.29E-66  | Branched-chain-amino-acid aminotransferase, cytosolic;                    |
| Px011620.2 | 1.2137 | 5.39E-29  | 4.60E-28  | Flavin-containing monooxygenase FMO GS-OX3;                               |
| Px012198.1 | 1.2125 | 2.46E-68  | 3.54E-67  | Fatty acid synthase; similar with FAS_RAT;                                |
| Px011286.1 | 1.2119 | 8.71E-219 | 2.89E-217 | Glutaryl-CoA dehydrogenase, mitochondrial;                                |
| Px008312.1 | 1.2097 | 2.46E-04  | 6.74E-04  | Serine/threonine-protein kinase PAK 3;                                    |
| Px002733.2 | 1.2093 | 0.00E+00  | 0.00E+00  | Aldehyde dehydrogenase, dimeric NADP-preferring;                          |
| Px002532.1 | 1.2056 | 1.34E-124 | 2.93E-123 | Peroxidasin; similar with PXDN_DROME;                                     |
| Px004810.1 | 1.2046 | 7.06E-09  | 2.95E-08  | ADP-ribosylation factor-like protein 2;                                   |
| Px011015.1 | 1.1970 | 2.82E-07  | 1.05E-06  | NAD-dependent deacetylase sirtuin-5;                                      |
| Px000039.1 | 1.1965 | 1.40E-231 | 4.93E-230 | UDP-glucuronosyltransferase 1-8;                                          |
| Px011499.2 | 1.1964 | 1.89E-18  | 1.23E-17  | Serine protease persephone; similar with PSH_DROME;                       |
| Px003013.3 | 1.1926 | 3.26E-165 | 8.82E-164 | Lipoyltransferase 1, mitochondrial;                                       |
| Px001933.1 | 1.1912 | 1.41E-09  | 6.20E-09  | Myrosinase 1; similar with MYRO1_BREBR;                                   |
| Px005839.1 | 1.1906 | 1.80E-18  | 1.17E-17  | Mannosyl-oligosaccharide alpha-1,2-mannosidase isoform A;                 |
| Px008946.1 | 1.1905 | 9.69E-78  | 1.54E-76  | Dynein heavy chain 7, axonemal;                                           |
| Px010887.1 | 1.1902 | 3.16E-21  | 2.24E-20  | Phosphoenolpyruvate carboxykinase [GTP];                                  |
| Px001894.8 | 1.1880 | 5.51E-25  | 4.27E-24  | Ethanolamine-phosphate cytidyltransferase;                                |
| Px009877.1 | 1.1833 | 6.80E-08  | 2.64E-07  | Ferrochelatase, mitochondrial; similar with HEMH_DROME;                   |
| Px000954.1 | 1.1823 | 1.17E-74  | 1.80E-73  | Succinyl-CoA ligase [GDP-forming] subunit beta, mitochondrial;            |
| Px005376.1 | 1.1799 | 4.53E-08  | 1.78E-07  | Chitotriosidase-1; similar with CHIT1_HUMAN;                              |
| Px000499.1 | 1.1782 | 3.06E-54  | 3.76E-53  | Inositol hexakisphosphate and diphosphoinositol-pentakisphosphate kinase; |
| Px008144.2 | 1.1768 | 3.02E-08  | 1.20E-07  | Serine/threonine-protein kinase/endoribonuclease ire-1;                   |
| Px007318.5 | 1.1744 | 5.94E-10  | 2.67E-09  | Serine/threonine-protein kinase 3;                                        |
| Px001224.1 | 1.1741 | 3.07E-05  | 9.43E-05  | Maleylacetoacetate isomerase;                                             |
| Px001380.1 | 1.1712 | 9.90E-20  | 6.75E-19  | Serine/threonine-protein kinase PAK 1;                                    |
| Px009624.5 | 1.1652 | 5.53E-155 | 1.42E-153 | Peroxisomal multifunctional enzyme type 2;                                |
| Px012423.1 | 1.1613 | 1.21E-06  | 4.25E-06  | TNF receptor-associated factor 6;                                         |
| Px006643.3 | 1.1605 | 8.63E-35  | 8.15E-34  | Luciferin 4-monooxygenase; similar with LUC1_LUCMI;                       |
| Px012467.1 | 1.1592 | 1.77E-09  | 7.71E-09  | GTP:AMP phosphotransferase, mitochondrial;                                |
| Px013246.1 | 1.1587 | 3.16E-98  | 5.83E-97  | Dehydrogenase/reductase SDR family member 4;                              |
| Px015447.4 | 1.1577 | 9.03E-08  | 3.48E-07  | Probable multidrug resistance-associated protein lethal;                  |
| Px000720.1 | 1.1574 | 2.24E-12  | 1.15E-11  | Galactokinase; similar with GALK1_HUMAN;                                  |
| Px009700.1 | 1.1567 | 6.53E-07  | 2.36E-06  | Phosphotriesterase-related protein;                                       |
| Px000966.1 | 1.1548 | 2.65E-18  | 1.71E-17  | Omega-amidase NIT2; similar with NIT2_BOVIN;                              |
| Px009523.1 | 1.1532 | 3.53E-05  | 1.08E-04  | N(4)-(Beta-N-acetylglucosaminyl)-L-asparaginase;                          |
| Px012044.1 | 1.1527 | 1.58E-22  | 1.16E-21  | Acyl-CoA synthetase family member 2, mitochondrial;                       |
| Px017788.1 | 1.1517 | 2.14E-54  | 2.63E-53  | Serine protease snake; similar with SNAK_DROME;                           |
| Px008985.1 | 1.1502 | 4.44E-26  | 3.54E-25  | Ubiquitin-conjugating enzyme E2 J1;                                       |
| Px015896.1 | 1.1494 | 3.63E-206 | 1.14E-204 | Glutathione S-transferase 1-1;                                            |
| Px015683.1 | 1.1458 | 8.18E-148 | 2.04E-146 | Protein yellow; similar with YELL_DROYA;                                  |
| Px010099.1 | 1.1453 | 2.76E-19  | 1.85E-18  | Phospholipase D1; similar with PLD1_RAT;                                  |
| Px016486.3 | 1.1425 | 1.12E-86  | 1.92E-85  | Glucose dehydrogenase [acceptor];                                         |
| Px012019.1 | 1.1399 | 6.88E-14  | 3.77E-13  | Protein ariadne-1 homolog; similar with ARI1_HUMAN;                       |

|            |        |           |           |                                                                       |
|------------|--------|-----------|-----------|-----------------------------------------------------------------------|
| Px001164.1 | 1.1390 | 6.83E-117 | 1.42E-115 | UDP-glucuronosyltransferase;                                          |
| Px007988.1 | 1.1338 | 2.66E-16  | 1.61E-15  | WD repeat-containing protein 48 homolog;                              |
| Px009675.1 | 1.1334 | 1.86E-96  | 3.40E-95  | UDP-glucuronosyltransferase 1-2;                                      |
| Px015496.1 | 1.1317 | 1.05E-11  | 5.23E-11  | Protein-S-isoprenylcysteine O-methyltransferase;                      |
| Px013533.1 | 1.1291 | 1.77E-09  | 7.71E-09  | Tetratricopeptide repeat protein 30A;                                 |
| Px010078.3 | 1.1245 | 3.16E-85  | 5.30E-84  | Glutathione S-transferase 1; similar with GSTT1_MANSE;                |
| Px016675.1 | 1.1203 | 5.63E-11  | 2.69E-10  | ATP-binding cassette sub-family G member 1;                           |
| Px015376.1 | 1.1200 | 1.05E-146 | 2.61E-145 | Phosphoenolpyruvate carboxykinase [GTP];                              |
| Px002044.1 | 1.1191 | 1.32E-04  | 3.76E-04  | Phosphatidylinositol 3-kinase catalytic subunit type 3;               |
| Px010436.1 | 1.1181 | 3.98E-92  | 7.03E-91  | Venom serine carboxypeptidase;                                        |
| Px002601.1 | 1.1167 | 9.50E-97  | 1.74E-95  | Probable pterin-4-alpha-carbinolamine dehydratase;                    |
| Px007883.1 | 1.1153 | 4.95E-21  | 3.49E-20  | Probable medium-chain specific acyl-CoA dehydrogenase, mitochondrial; |
| Px005413.1 | 1.1117 | 2.64E-198 | 8.16E-197 | Protein lethal(2)essential for life;                                  |
| Px000042.3 | 1.1085 | 4.45E-27  | 3.66E-26  | Alcohol dehydrogenase [NADP+];                                        |
| Px016883.1 | 1.1047 | 3.11E-06  | 1.06E-05  | Mitogen-activated protein kinase kinase kinase kinase 3;              |
| Px011311.1 | 1.1044 | 8.81E-09  | 3.65E-08  | Proteasome subunit beta type-1;                                       |
| Px003316.1 | 1.0981 | 0.00E+00  | 0.00E+00  | C-1-tetrahydrofolate synthase, cytoplasmic;                           |
| Px016926.1 | 1.0912 | 1.86E-15  | 1.08E-14  | Ubiquitin carboxyl-terminal hydrolase 20;                             |
| Px004968.1 | 1.0900 | 1.23E-11  | 6.07E-11  | RNA 3'-terminal phosphate cyclase;                                    |
| Px008244.2 | 1.0882 | 5.98E-89  | 1.04E-87  | Sialic acid synthase; similar with SIAS_HUMAN;                        |
| Px008596.1 | 1.0870 | 1.05E-14  | 5.94E-14  | Transmembrane protease serine 9;                                      |
| Px013663.1 | 1.0859 | 8.76E-97  | 1.60E-95  | Aldehyde dehydrogenase family 1 member L1;                            |
| Px009265.1 | 1.0812 | 1.04E-17  | 6.55E-17  | Sepiapterin reductase; similar with SPRE_XENTR;                       |
| Px005900.1 | 1.0773 | 1.30E-16  | 7.94E-16  | Cytochrome P450 6B2; similar with CP6B2_HELAM;                        |
| Px016558.1 | 1.0773 | 3.20E-04  | 8.66E-04  | Putative glycerol kinase 5; similar with GLPK5_DANRE;                 |
| Px005110.3 | 1.0773 | 2.59E-04  | 7.09E-04  | ABC transporter G family member 23;                                   |
| Px008898.1 | 1.0773 | 3.98E-06  | 1.34E-05  | Serine/threonine-protein kinase GA29083;                              |
| Px009393.2 | 1.0773 | 2.59E-04  | 7.09E-04  | Guanine deaminase; similar with GUAD_PONAB;                           |
| Px001888.1 | 1.0743 | 2.09E-65  | 2.94E-64  | N-acetyltransferase 15; similar with NAT15_MOUSE;                     |
| Px000764.1 | 1.0743 | 4.55E-43  | 4.88E-42  | Acetyl-CoA carboxylase; similar with ACAC_CHICK;                      |
| Px003029.1 | 1.0715 | 3.95E-23  | 2.93E-22  | Insulin receptor; similar with INSR_XENLA;                            |
| Px000678.1 | 1.0709 | 3.30E-234 | 1.17E-232 | Thioredoxin, mitochondrial; similar with THIOM_RAT;                   |
| Px007394.2 | 1.0691 | 1.25E-39  | 1.29E-38  | Peroxidasin homolog; similar with PXDN_MOUSE;                         |
| Px007185.1 | 1.0652 | 1.08E-11  | 5.33E-11  | ATP-binding cassette sub-family G member 4;                           |
| Px006816.1 | 1.0638 | 0.00E+00  | 0.00E+00  | 2-oxoisovalerate dehydrogenase subunit alpha, mitochondrial;          |
| Px013543.1 | 1.0629 | 1.37E-18  | 8.94E-18  | Matrix metalloproteinase-25;                                          |
| Px004811.1 | 1.0625 | 9.30E-10  | 4.13E-09  | Calcium-independent protein kinase C;                                 |
| Px011285.1 | 1.0624 | 2.26E-250 | 8.22E-249 | UDP-glucuronosyltransferase 2B4;                                      |
| Px000825.3 | 1.0612 | 4.33E-28  | 3.63E-27  | Ferrochelatase, mitochondrial;                                        |
| Px007850.1 | 1.0586 | 5.47E-08  | 2.14E-07  | Dynein heavy chain 2, axonemal;                                       |
| Px010576.1 | 1.0580 | 2.09E-20  | 1.44E-19  | Inositol oxygenase; similar with MIOX_DANRE;                          |
| Px013239.1 | 1.0562 | 3.46E-07  | 1.28E-06  | Putative glycerol kinase 3;                                           |
| Px003609.1 | 1.0559 | 4.25E-07  | 1.56E-06  | Guanylate cyclase 32E; similar with GCY3E_DROME;                      |
| Px016756.1 | 1.0544 | 4.92E-12  | 2.48E-11  | Cytoplasmic aconitate hydratase;                                      |
| Px005951.1 | 1.0534 | 7.33E-57  | 9.34E-56  | Phospholipid hydroperoxide glutathione peroxidase, mitochondrial;     |
| Px015503.1 | 1.0510 | 1.25E-10  | 5.86E-10  | Histone deacetylase 4; similar with HDAC4_MOUSE;                      |
| Px012100.1 | 1.0492 | 1.15E-05  | 3.71E-05  | Stromal cell-derived factor 2; similar with SDF2_HUMAN;               |
| Px000351.3 | 1.0490 | 3.50E-79  | 5.60E-78  | Chitin synthase 8; similar with CHS8_USTMA;                           |
| Px005198.1 | 1.0445 | 2.21E-21  | 1.58E-20  | Long-chain fatty acid transport protein 4;                            |
| Px012834.1 | 1.0441 | 9.14E-32  | 8.21E-31  | Phosphopantothenate--cysteine ligase;                                 |
| Px002232.1 | 1.0403 | 8.42E-08  | 3.25E-07  | Spectrin alpha chain; similar with SPTCA_DROME;                       |
| Px010797.1 | 1.0393 | 1.27E-07  | 4.84E-07  | Epidermal retinol dehydrogenase 2;                                    |
| Px011708.1 | 1.0393 | 3.52E-26  | 2.82E-25  | Amidophosphoribosyltransferase;                                       |
| Px016062.1 | 1.0391 | 1.04E-10  | 4.90E-10  | Prostamide/prostaglandin F synthase; similar with PGFS_RAT;           |

|            |         |           |           |                                                                    |
|------------|---------|-----------|-----------|--------------------------------------------------------------------|
| Px007493.1 | 1.0389  | 5.06E-106 | 9.92E-105 | Delta-1-pyrroline-5-carboxylate synthase;                          |
| Px016651.3 | 1.0381  | 6.93E-06  | 2.28E-05  | Polypeptide N-acetylgalactosaminyltransferase 5;                   |
| Px016983.3 | 1.0379  | 6.64E-09  | 2.78E-08  | Serine proteinase stubble; similar with STUB_DROME;                |
| Px013730.1 | 1.0378  | 8.17E-18  | 5.18E-17  | Myrosinase 1; similar with MYRO1_BREBR;                            |
| Px004354.1 | 1.0356  | 2.73E-18  | 1.76E-17  | UDP-N-acetylhexosamine pyrophosphorylase-like protein 1;           |
| Px008096.1 | 1.0350  | 1.59E-05  | 5.03E-05  | TNF receptor-associated factor 6-B;                                |
| Px008659.1 | 1.0347  | 2.76E-08  | 1.10E-07  | Tyrosine-protein phosphatase non-receptor type 23;                 |
| Px016791.1 | 1.0335  | 1.04E-22  | 7.66E-22  | Inositol oxygenase; similar with MIOX_DANRE;                       |
| Px006391.1 | 1.0276  | 4.24E-21  | 3.00E-20  | ATP-binding cassette sub-family B member 6, mitochondrial;         |
| Px003748.1 | 1.0252  | 1.80E-24  | 1.37E-23  | Sphingosine-1-phosphate lyase; similar with SGPL_DROME;            |
| Px010631.1 | 1.0225  | 2.51E-26  | 2.02E-25  | Sphingomyelin phosphodiesterase;                                   |
| Px008837.1 | 1.0217  | 1.55E-94  | 2.77E-93  | Long-chain-fatty-acid--CoA ligase ACSBG2;                          |
| Px010263.1 | 1.0192  | 2.96E-04  | 8.05E-04  | Probable methylmalonate-semialdehyde dehydrogenase, mitochondrial; |
| Px008871.1 | 1.0184  | 8.47E-17  | 5.20E-16  | Beta-1,3-galactosyltransferase brn;                                |
| Px015217.1 | 1.0179  | 5.90E-29  | 5.04E-28  | 4-aminobutyrate aminotransferase, mitochondrial;                   |
| Px005901.1 | 1.0179  | 5.85E-11  | 2.79E-10  | Cytochrome P450 6B4; similar with CP6B4_PAPGL;                     |
| Px004326.1 | 1.0176  | 3.65E-04  | 9.79E-04  | PI-PLC X domain-containing protein 3;                              |
| Px012551.1 | 1.0171  | 6.11E-09  | 2.57E-08  | Uncharacterized protein R102.4; similar with YF64_CAEEL;           |
| Px014822.1 | 1.0107  | 6.18E-81  | 1.00E-79  | 3-ketoacyl-CoA thiolase, mitochondrial;                            |
| Px013693.1 | 1.0094  | 5.72E-08  | 2.23E-07  | Aldehyde oxidase; similar with ADO_HUMAN;                          |
| Px003215.1 | 1.0078  | 3.27E-10  | 1.49E-09  | N-acetyllactosaminide beta-1,3-N-acetylglucosaminyltransferase;    |
| Px004243.3 | 1.0071  | 7.75E-78  | 1.23E-76  | Ferritin subunit; similar with FRI_AEDAE;                          |
| Px015882.1 | 1.0071  | 2.32E-110 | 4.67E-109 | Alcohol dehydrogenase [NADP+] A;                                   |
| Px010660.1 | 1.0065  | 4.71E-17  | 2.92E-16  | Probable general secretion pathway protein D;                      |
| Px009169.1 | 1.0057  | 5.15E-06  | 1.71E-05  | Myrosinase 1; similar with MYRO1_BREBR;                            |
| Px004984.1 | 1.0033  | 2.67E-04  | 7.30E-04  | Peroxisomal leader peptide-processing protease;                    |
| Px012297.1 | 1.0024  | 1.28E-14  | 7.21E-14  | ABC transporter G family member 20;                                |
| Px013169.1 | 1.0023  | 2.92E-07  | 1.09E-06  | Lactase-phlorizin hydrolase; similar with LPH_HUMAN;               |
| Px002093.2 | 1.0006  | 1.18E-05  | 3.78E-05  | Ras-like protein 1; similar with RAS1_DROYA;                       |
| Px014199.1 | -1.0020 | 3.63E-06  | 1.23E-05  | Serine/threonine-protein kinase atr;                               |
| Px002896.2 | -1.0039 | 5.09E-96  | 9.24E-95  | Recombination repair protein 1;                                    |
| Px012716.1 | -1.0128 | 4.03E-70  | 5.92E-69  | Proline dehydrogenase 1, mitochondrial;                            |
| Px014740.1 | -1.0140 | 7.74E-60  | 1.02E-58  | Probable ATP-dependent RNA helicase DDX27;                         |
| Px006855.1 | -1.0156 | 1.75E-131 | 3.94E-130 | STE20-like serine/threonine-protein kinase;                        |
| Px009226.1 | -1.0167 | 9.86E-10  | 4.37E-09  | DNA replication licensing factor MCM4;                             |
| Px002786.1 | -1.0167 | 2.80E-85  | 4.70E-84  | Elongation factor Tu, mitochondrial;                               |
| Px013606.1 | -1.0228 | 0.00E+00  | 0.00E+00  | Unknown function                                                   |
| Px014827.2 | -1.0240 | 2.30E-10  | 1.06E-09  | Interleukin enhancer-binding factor 2 homolog;                     |
| Px016098.1 | -1.0241 | 8.54E-10  | 3.80E-09  | Phytanoyl-CoA dioxygenase, peroxisomal;                            |
| Px003169.3 | -1.0251 | 2.29E-69  | 3.34E-68  | Probable lysine-specific demethylase 4B;                           |
| Px004110.1 | -1.0281 | 8.36E-07  | 2.99E-06  | Aldose reductase; similar with ALDR_RABIT;                         |
| Px008828.1 | -1.0322 | 1.20E-16  | 7.32E-16  | Uncharacterized protein C2orf79 homolog;                           |
| Px011056.1 | -1.0324 | 1.65E-139 | 3.92E-138 | rRNA 2'-O-methyltransferase fibrillarlin;                          |
| Px001502.1 | -1.0334 | 1.38E-18  | 9.02E-18  | Ubiquitin carboxyl-terminal hydrolase 2;                           |
| Px018067.1 | -1.0346 | 8.35E-101 | 1.58E-99  | Twitchin; similar with UNC22_CAEEL;                                |
| Px013971.1 | -1.0481 | 0.00E+00  | 0.00E+00  | Twitchin; similar with UNC22_CAEEL;                                |
| Px009682.1 | -1.0521 | 0.00E+00  | 0.00E+00  | Cytochrome c oxidase subunit 6A1, mitochondrial;                   |
| Px012460.1 | -1.0566 | 1.78E-04  | 5.00E-04  | E3 ubiquitin-protein ligase hyd; similar with HYD_DROME;           |
| Px010334.1 | -1.0697 | 2.71E-144 | 6.64E-143 | 46 kDa FK506-binding nuclear protein;                              |
| Px013049.2 | -1.0857 | 1.18E-05  | 3.79E-05  | Uncharacterized aarF domain-containing protein kinase 1;           |
| Px000929.1 | -1.0927 | 2.38E-04  | 6.54E-04  | Octopamine receptor beta-2R; similar with OCTB2_DROME;             |
| Px016931.1 | -1.0939 | 3.25E-26  | 2.60E-25  | Methyltransferase-like protein 6;                                  |
| Px014608.2 | -1.0993 | 1.84E-38  | 1.86E-37  | AGAP011281-PA; similar with Q7QHP0_ANOGA;                          |
| Px013792.1 | -1.1047 | 6.26E-31  | 5.54E-30  | Thrombospondin type-1 domain-containing protein 7A;                |

|            |         |           |           |                                                                                  |
|------------|---------|-----------|-----------|----------------------------------------------------------------------------------|
| Px013179.1 | -1.1092 | 3.73E-04  | 9.98E-04  | Insulin-degrading enzyme; similar with IDE_HUMAN;                                |
| Px012461.1 | -1.1191 | 1.86E-13  | 9.95E-13  | Lethal(2)neighbour of tid protein;                                               |
| Px004104.1 | -1.1191 | 3.46E-06  | 1.17E-05  | GH18371; similar with B4JEW4_DROGR;                                              |
| Px010245.2 | -1.1234 | 1.68E-45  | 1.88E-44  | Probable small nuclear ribonucleoprotein G;                                      |
| Px010417.1 | -1.1283 | 8.94E-13  | 4.66E-12  | Lysine-specific demethylase 5B;                                                  |
| Px006411.1 | -1.1419 | 6.89E-15  | 3.93E-14  | UDP-N-acetylglucosamine-peptide N-acetylglucosaminyltransferase 110 kDa subunit; |
| Px002001.1 | -1.1422 | 3.10E-161 | 8.27E-160 | Peptidyl-prolyl cis-trans isomerase-like 4;                                      |
| Px010954.1 | -1.1513 | 1.34E-08  | 5.50E-08  | Probable DNA-directed RNA polymerases I and III subunit RPAC2;                   |
| Px015490.1 | -1.1584 | 5.68E-45  | 6.25E-44  | Probable ATP-dependent RNA helicase DDX52;                                       |
| Px002394.3 | -1.1661 | 5.87E-70  | 8.60E-69  | D-beta-hydroxybutyrate dehydrogenase, mitochondrial;                             |
| Px000827.1 | -1.1679 | 2.17E-07  | 8.16E-07  | Ubiquitin carboxyl-terminal hydrolase 2;                                         |
| Px017914.1 | -1.1872 | 0.00E+00  | 0.00E+00  | Paramyosin, long form; similar with MYSP1_DROME;                                 |
| Px000295.3 | -1.1899 | 1.60E-274 | 6.33E-273 | Halomucin; similar with HMU_HALWD;                                               |
| Px008486.1 | -1.1907 | 3.74E-24  | 2.84E-23  | Pre-mRNA-processing factor 19;                                                   |
| Px005700.2 | -1.1982 | 9.41E-21  | 6.58E-20  | Serine/threonine-protein kinase SBK1;                                            |
| Px003971.1 | -1.2004 | 2.05E-216 | 6.76E-215 | Unknown function                                                                 |
| Px012350.1 | -1.2045 | 5.28E-49  | 6.14E-48  | Ribonucleoside-diphosphate reductase large subunit;                              |
| Px012661.1 | -1.2046 | 8.66E-13  | 4.51E-12  | cAMP-dependent protein kinase type II regulatory subunit;                        |
| Px014783.1 | -1.2077 | 6.81E-102 | 1.30E-100 | Histone-lysine N-methyltransferase SETD1B;                                       |
| Px002758.1 | -1.2096 | 1.96E-07  | 7.39E-07  | RNA polymerase II subunit B1 CTD phosphatase Rpap2;                              |
| Px007614.2 | -1.2127 | 9.33E-98  | 1.72E-96  | Muscle M-line assembly protein unc-89;                                           |
| Px013191.1 | -1.2294 | 5.69E-11  | 2.72E-10  | Aromatic-L-amino-acid decarboxylase;                                             |
| Px003102.1 | -1.2302 | 1.72E-11  | 8.46E-11  | tRNA (uracil-5-)-methyltransferase homolog A;                                    |
| Px017913.1 | -1.2473 | 0.00E+00  | 0.00E+00  | Paramyosin, short form; similar with MYSP2_DROME;                                |
| Px007815.1 | -1.2476 | 0.00E+00  | 0.00E+00  | Myosin heavy chain, muscle;                                                      |
| Px009182.1 | -1.2505 | 0.00E+00  | 0.00E+00  | Seryl-tRNA synthetase, cytoplasmic;                                              |
| Px012158.1 | -1.2615 | 1.63E-10  | 7.54E-10  | Alpha-N-acetylgalactosaminidase;                                                 |
| Px016541.1 | -1.2656 | 6.55E-07  | 2.37E-06  | Elongation factor Tu, mitochondrial;                                             |
| Px002640.1 | -1.2858 | 0.00E+00  | 0.00E+00  | Alpha-actinin, sarcomeric; similar with ACTN_DROME;                              |
| Px012129.1 | -1.2949 | 1.78E-33  | 1.64E-32  | Lysosomal Pro-X carboxypeptidase;                                                |
| Px015632.1 | -1.3238 | 2.97E-07  | 1.10E-06  | Flap endonuclease 1; similar with FEN1_DROAN;                                    |
| Px009149.1 | -1.3366 | 4.40E-70  | 6.46E-69  | 116 kDa U5 small nuclear ribonucleoprotein component;                            |
| Px008876.1 | -1.3446 | 1.07E-09  | 4.74E-09  | Tubulin beta-4 chain; similar with TBB4_CAEEL;                                   |
| Px010423.1 | -1.3483 | 1.94E-09  | 8.45E-09  | G/T mismatch-specific thymine DNA glycosylase;                                   |
| Px017176.1 | -1.3522 | 4.34E-23  | 3.21E-22  | Probable ATP-dependent RNA helicase kurz;                                        |
| Px010023.2 | -1.3680 | 1.39E-22  | 1.02E-21  | ATP-dependent RNA helicase DDX24;                                                |
| Px000852.1 | -1.3773 | 7.86E-06  | 2.57E-05  | Probable phytanoyl-CoA dioxygenase;                                              |
| Px009314.2 | -1.3802 | 1.36E-12  | 7.02E-12  | A disintegrin and metalloproteinase with thrombospondin motifs 16;               |
| Px010117.1 | -1.3859 | 3.21E-207 | 1.02E-205 | Asparagine synthetase [glutamine-hydrolyzing];                                   |
| Px005941.1 | -1.3879 | 3.50E-09  | 1.50E-08  | UDP-N-acetylglucosamine 1-carboxyvinyltransferase 2;                             |
| Px008352.1 | -1.3967 | 7.24E-17  | 4.46E-16  | SOX domain-containing protein dichaete;                                          |
| Px004087.1 | -1.3985 | 1.15E-50  | 1.37E-49  | Signal peptidase complex subunit 2;                                              |
| Px009337.1 | -1.4082 | 8.00E-05  | 2.35E-04  | M-phase inducer phosphatase; similar with MPIP_DROME;                            |
| Px014167.1 | -1.4107 | 0.00E+00  | 0.00E+00  | Titin; similar with TITIN_DROME;                                                 |
| Px001501.4 | -1.4245 | 9.22E-22  | 6.65E-21  | Ubiquitin carboxyl-terminal hydrolase;                                           |
| Px013713.2 | -1.4278 | 1.06E-42  | 1.13E-41  | GMP reductase 1; similar with GMPR1_MOUSE;                                       |
| Px006766.1 | -1.4330 | 1.04E-119 | 2.20E-118 | ATP-binding cassette sub-family F member 1;                                      |
| Px011795.1 | -1.4417 | 5.27E-29  | 4.51E-28  | RuvB-like helicase 2; similar with RUVB2_DROPS;                                  |
| Px017708.4 | -1.4493 | 1.01E-40  | 1.05E-39  | Long-chain-fatty-acid--CoA ligase 1;                                             |
| Px009474.1 | -1.4691 | 0.00E+00  | 0.00E+00  | H/ACA ribonucleoprotein complex subunit 4;                                       |
| Px000037.1 | -1.4737 | 2.19E-29  | 1.89E-28  | DNA replication licensing factor Mcm5;                                           |
| Px005468.1 | -1.4753 | 3.05E-04  | 8.27E-04  | Alpha,alpha-trehalose-phosphate synthase [UDP-forming];                          |
| Px000572.1 | -1.4791 | 1.12E-04  | 3.23E-04  | Phosphatidylinositol-binding clathrin assembly protein LAP;                      |
| Px009530.1 | -1.5142 | 5.85E-17  | 3.61E-16  | DNA polymerase eta; similar with POLH_HUMAN;                                     |

|            |         |           |           |                                                                      |
|------------|---------|-----------|-----------|----------------------------------------------------------------------|
| Px016332.1 | -1.5166 | 0.00E+00  | 0.00E+00  | Calcium-transporting ATPase sarcoplasmic/endoplasmic reticulum type; |
| Px002987.1 | -1.5181 | 0.00E+00  | 0.00E+00  | Methionine aminopeptidase 2;                                         |
| Px015198.2 | -1.5238 | 2.14E-20  | 1.48E-19  | NADH dehydrogenase [ubiquinone] 1 alpha subcomplex subunit 8;        |
| Px013969.3 | -1.5363 | 0.00E+00  | 0.00E+00  | Twitchin; similar with UNC22_CAEEL;                                  |
| Px010951.2 | -1.5366 | 3.53E-143 | 8.64E-142 | Lysosomal alpha-mannosidase;                                         |
| Px014636.1 | -1.5417 | 2.28E-04  | 6.26E-04  | Trypsin-1; similar with TRY1_ANOGA;                                  |
| Px013405.1 | -1.5636 | 1.01E-18  | 6.66E-18  | CAP isoform A; similar with C9DTM4_BOMMO;                            |
| Px002580.1 | -1.6232 | 2.48E-05  | 7.70E-05  | Kinase suppressor of Ras 2; similar with KSR2_HUMAN;                 |
| Px011825.1 | -1.6306 | 5.34E-09  | 2.25E-08  | Glucose dehydrogenase [acceptor];                                    |
| Px004483.1 | -1.6597 | 9.63E-08  | 3.71E-07  | N-alpha-acetyltransferase 20, NatB catalytic subunit;                |
| Px016787.1 | -1.6669 | 1.01E-06  | 3.59E-06  | Insulin-degrading enzyme; similar with IDE_HUMAN;                    |
| Px009430.1 | -1.6972 | 1.08E-06  | 3.83E-06  | Histone-arginine methyltransferase CARMER;                           |
| Px016603.1 | -1.7020 | 0.00E+00  | 0.00E+00  | Muscle M-line assembly protein unc-89;                               |
| Px003941.1 | -1.7142 | 4.69E-05  | 1.42E-04  | Probable phospholipid-transporting ATPase IA;                        |
| Px014610.1 | -1.7464 | 1.84E-20  | 1.28E-19  | Tubulin beta-2 chain; similar with TBB2_HOMAM;                       |
| Px001595.1 | -1.7505 | 2.87E-215 | 9.40E-214 | Peptidyl-prolyl cis-trans isomerase 1;                               |
| Px015524.1 | -1.7807 | 3.80E-14  | 2.11E-13  | Cyclin-dependent kinase 12;                                          |
| Px007377.1 | -1.9772 | 8.53E-07  | 3.05E-06  | Glucose 1-dehydrogenase 1; similar with DHG1_BACME;                  |
| Px002199.1 | -2.0641 | 1.94E-17  | 1.22E-16  | 4-coumarate--CoA ligase-like 5;                                      |
| Px013590.1 | -2.0927 | 3.30E-08  | 1.31E-07  | Protein arginine N-methyltransferase 3;                              |
| Px009473.1 | -2.1154 | 2.05E-08  | 8.25E-08  | DNA-directed RNA polymerases I, II, and III subunit RPABC3;          |
| Px011896.1 | -2.2353 | 0.00E+00  | 0.00E+00  | PAB-dependent poly(A)-specific ribonuclease subunit 2;               |
| Px012510.1 | -2.2884 | 1.67E-09  | 7.30E-09  | N-glycosylase/DNA lyase; similar with OGG1_DROME;                    |
| Px015353.2 | -2.4729 | 9.32E-07  | 3.32E-06  | Fibroblast growth factor receptor 3;                                 |
| Px009429.3 | -2.5772 | 1.39E-110 | 2.81E-109 | ATP-dependent RNA helicase DDX24;                                    |
| Px017404.1 | -2.6008 | 9.07E-06  | 2.95E-05  | Fidgetin-like protein 1; similar with FIGL1_XENLA;                   |
| Px012212.1 | -2.8769 | 4.13E-06  | 1.39E-05  | Multidrug resistance protein homolog 49;                             |
| Px010814.1 | -3.0382 | 1.61E-05  | 5.11E-05  | ADAMTS-like protein 3; similar with ATL3_HUMAN;                      |
| Px000980.1 | -3.3822 | 3.42E-05  | 1.05E-04  | Catalase; similar with CATA_PONAB;                                   |
| Px003126.1 | -3.3822 | 3.42E-05  | 1.05E-04  | Adenylate cyclase type 3; similar with ADCY3_MOUSE;                  |
| Px017388.1 | -8.2367 | 1.78E-04  | 4.99E-04  | Neither inactivation nor afterpotential protein G;                   |
| Px012074.1 | #####   | 3.46E-04  | 9.33E-04  | Acylphosphatase-2; similar with ACYP2_ANAPL;                         |

**GO:0008236**

|            |         |           |           |                                                     |
|------------|---------|-----------|-----------|-----------------------------------------------------|
| Px015905.1 | 13.4712 | 1.77E-71  | 2.63E-70  | Transmembrane protease serine 6;                    |
| Px003000.1 | 12.5364 | 2.28E-42  | 2.43E-41  | Transmembrane protease serine 6;                    |
| Px006453.1 | 10.3391 | 8.15E-10  | 3.63E-09  | Transmembrane protease serine 6;                    |
| Px017505.1 | 9.7974  | 1.71E-04  | 4.81E-04  | Plasma kallikrein; similar with KLKB1_HUMAN;        |
| Px007670.1 | 6.2472  | 5.75E-63  | 7.92E-62  | Proclotting enzyme; similar with PCE_TACTR;         |
| Px005241.1 | 4.3794  | 1.43E-53  | 1.74E-52  | Trypsin CFT-1; similar with TRYP_CHOFU;             |
| Px005243.1 | 3.9876  | 0.00E+00  | 0.00E+00  | Trypsin, alkaline A; similar with TRYA_MANSE;       |
| Px015277.1 | 3.9698  | 7.98E-158 | 2.09E-156 | Trypsin CFT-1; similar with TRYP_CHOFU;             |
| Px010313.2 | 3.7896  | 2.43E-106 | 4.78E-105 | Serine proteinase stubble; similar with STUB_DROME; |
| Px006623.1 | 3.7777  | 1.10E-26  | 9.00E-26  | Transmembrane protease serine 9;                    |
| Px012813.1 | 3.6622  | 2.98E-06  | 1.02E-05  | Serine proteinase stubble; similar with STUB_DROME; |
| Px008538.1 | 3.4202  | 3.15E-138 | 7.39E-137 | Trypsin, alkaline B; similar with TRYB_MANSE;       |
| Px005657.1 | 3.4122  | 1.95E-23  | 1.46E-22  | Proclotting enzyme; similar with PCE_TACTR;         |
| Px007621.1 | 3.3847  | 6.61E-21  | 4.65E-20  | Trypsin CFT-1; similar with TRYP_CHOFU;             |
| Px007619.2 | 3.0951  | 0.00E+00  | 0.00E+00  | Trypsin, alkaline A; similar with TRYA_MANSE;       |
| Px003479.1 | 2.9314  | 1.50E-17  | 9.44E-17  | Protein rhomboid; similar with RHOM_DROME;          |
| Px015280.1 | 2.9138  | 7.05E-10  | 3.15E-09  | Trypsin CFT-1; similar with TRYP_CHOFU;             |
| Px007618.1 | 2.7222  | 1.13E-272 | 4.41E-271 | Trypsin CFT-1; similar with TRYP_CHOFU;             |
| Px007674.2 | 2.5239  | 0.00E+00  | 0.00E+00  | Collagenase; similar with COGS_HYPLI;               |
| Px007675.1 | 2.5233  | 0.00E+00  | 0.00E+00  | Collagenase; similar with COGS_HYPLI;               |

|            |        |           |           |                                                     |
|------------|--------|-----------|-----------|-----------------------------------------------------|
| Px010489.1 | 2.4085 | 6.89E-66  | 9.73E-65  | Trypsin, alkaline C; similar with TRYC_MANSE;       |
| Px009395.1 | 2.3871 | 1.03E-17  | 6.47E-17  | Proclotting enzyme; similar with PCE_TACTR;         |
| Px007616.1 | 2.3746 | 1.09E-158 | 2.87E-157 | Trypsin CFT-1; similar with TRYP_CHOFU;             |
| Px015275.1 | 2.3286 | 0.00E+00  | 0.00E+00  | Trypsin CFT-1; similar with TRYP_CHOFU;             |
| Px006622.3 | 2.2728 | 9.45E-20  | 6.46E-19  | Ovochymase-1; similar with OVCH1_HUMAN;             |
| Px011796.5 | 2.0740 | 1.05E-51  | 1.26E-50  | Putative aminopeptidase W07G4.4;                    |
| Px001833.1 | 2.0603 | 0.00E+00  | 0.00E+00  | Serine protease easter; similar with EAST_DROME;    |
| Px011097.1 | 1.9460 | 2.65E-10  | 1.22E-09  | Serine proteinase stubble; similar with STUB_DROME; |
| Px008406.1 | 1.8639 | 2.77E-08  | 1.10E-07  | Serine proteinase stubble; similar with STUB_DROME; |
| Px009715.1 | 1.5988 | 8.85E-16  | 5.24E-15  | Mitochondrial inner membrane protease subunit 1;    |
| Px016171.2 | 1.3471 | 1.79E-54  | 2.21E-53  | Prolyl endopeptidase; similar with PPCE_MOUSE;      |
| Px008596.1 | 1.0870 | 1.05E-14  | 5.94E-14  | Transmembrane protease serine 9;                    |
| Px016983.3 | 1.0379 | 6.64E-09  | 2.78E-08  | Serine proteinase stubble; similar with STUB_DROME; |

**GO:0017171**

|            |         |           |           |                                                     |
|------------|---------|-----------|-----------|-----------------------------------------------------|
| Px015905.1 | 13.4712 | 1.77E-71  | 2.63E-70  | Transmembrane protease serine 6;                    |
| Px003000.1 | 12.5364 | 2.28E-42  | 2.43E-41  | Transmembrane protease serine 6;                    |
| Px006453.1 | 10.3391 | 8.15E-10  | 3.63E-09  | Transmembrane protease serine 6;                    |
| Px017505.1 | 9.7974  | 1.71E-04  | 4.81E-04  | Plasma kallikrein; similar with KLKB1_HUMAN;        |
| Px007670.1 | 6.2472  | 5.75E-63  | 7.92E-62  | Proclotting enzyme; similar with PCE_TACTR;         |
| Px005241.1 | 4.3794  | 1.43E-53  | 1.74E-52  | Trypsin CFT-1; similar with TRYP_CHOFU;             |
| Px005243.1 | 3.9876  | 0.00E+00  | 0.00E+00  | Trypsin, alkaline A; similar with TRYA_MANSE;       |
| Px015277.1 | 3.9698  | 7.98E-158 | 2.09E-156 | Trypsin CFT-1; similar with TRYP_CHOFU;             |
| Px010313.2 | 3.7896  | 2.43E-106 | 4.78E-105 | Serine proteinase stubble; similar with STUB_DROME; |
| Px006623.1 | 3.7777  | 1.10E-26  | 9.00E-26  | Transmembrane protease serine 9;                    |
| Px012813.1 | 3.6622  | 2.98E-06  | 1.02E-05  | Serine proteinase stubble; similar with STUB_DROME; |
| Px008538.1 | 3.4202  | 3.15E-138 | 7.39E-137 | Trypsin, alkaline B; similar with TRYB_MANSE;       |
| Px005657.1 | 3.4122  | 1.95E-23  | 1.46E-22  | Proclotting enzyme; similar with PCE_TACTR;         |
| Px007621.1 | 3.3847  | 6.61E-21  | 4.65E-20  | Trypsin CFT-1; similar with TRYP_CHOFU;             |
| Px007619.2 | 3.0951  | 0.00E+00  | 0.00E+00  | Trypsin, alkaline A; similar with TRYA_MANSE;       |
| Px003479.1 | 2.9314  | 1.50E-17  | 9.44E-17  | Protein rhomboid; similar with RHOM_DROME;          |
| Px015280.1 | 2.9138  | 7.05E-10  | 3.15E-09  | Trypsin CFT-1; similar with TRYP_CHOFU;             |
| Px007618.1 | 2.7222  | 1.13E-272 | 4.41E-271 | Trypsin CFT-1; similar with TRYP_CHOFU;             |
| Px007674.2 | 2.5239  | 0.00E+00  | 0.00E+00  | Collagenase; similar with COGS_HYPLI;               |
| Px007675.1 | 2.5233  | 0.00E+00  | 0.00E+00  | Collagenase; similar with COGS_HYPLI;               |
| Px010489.1 | 2.4085  | 6.89E-66  | 9.73E-65  | Trypsin, alkaline C; similar with TRYC_MANSE;       |
| Px009395.1 | 2.3871  | 1.03E-17  | 6.47E-17  | Proclotting enzyme; similar with PCE_TACTR;         |
| Px007616.1 | 2.3746  | 1.09E-158 | 2.87E-157 | Trypsin CFT-1; similar with TRYP_CHOFU;             |
| Px015275.1 | 2.3286  | 0.00E+00  | 0.00E+00  | Trypsin CFT-1; similar with TRYP_CHOFU;             |
| Px006622.3 | 2.2728  | 9.45E-20  | 6.46E-19  | Ovochymase-1; similar with OVCH1_HUMAN;             |
| Px011796.5 | 2.0740  | 1.05E-51  | 1.26E-50  | Putative aminopeptidase W07G4.4;                    |
| Px001833.1 | 2.0603  | 0.00E+00  | 0.00E+00  | Serine protease easter; similar with EAST_DROME;    |
| Px011097.1 | 1.9460  | 2.65E-10  | 1.22E-09  | Serine proteinase stubble; similar with STUB_DROME; |
| Px008406.1 | 1.8639  | 2.77E-08  | 1.10E-07  | Serine proteinase stubble; similar with STUB_DROME; |
| Px009715.1 | 1.5988  | 8.85E-16  | 5.24E-15  | Mitochondrial inner membrane protease subunit 1;    |
| Px016171.2 | 1.3471  | 1.79E-54  | 2.21E-53  | Prolyl endopeptidase; similar with PPCE_MOUSE;      |
| Px008596.1 | 1.0870  | 1.05E-14  | 5.94E-14  | Transmembrane protease serine 9;                    |
| Px016983.3 | 1.0379  | 6.64E-09  | 2.78E-08  | Serine proteinase stubble; similar with STUB_DROME; |

**GO:0070011**

|            |         |          |          |                                              |
|------------|---------|----------|----------|----------------------------------------------|
| Px015905.1 | 13.4712 | 1.77E-71 | 2.63E-70 | Transmembrane protease serine 6;             |
| Px003000.1 | 12.5364 | 2.28E-42 | 2.43E-41 | Transmembrane protease serine 6;             |
| Px006453.1 | 10.3391 | 8.15E-10 | 3.63E-09 | Transmembrane protease serine 6;             |
| Px017505.1 | 9.7974  | 1.71E-04 | 4.81E-04 | Plasma kallikrein; similar with KLKB1_HUMAN; |



|            |        |           |           |                                                         |
|------------|--------|-----------|-----------|---------------------------------------------------------|
| Px007670.1 | 6.2472 | 5.75E-63  | 7.92E-62  | Proclotting enzyme; similar with PCE_TACTR;             |
| Px000995.2 | 4.3915 | 0.00E+00  | 0.00E+00  | Carboxypeptidase A4; similar with CBPA4_HUMAN;          |
| Px005241.1 | 4.3794 | 1.43E-53  | 1.74E-52  | Trypsin CFT-1; similar with TRYP_CHOFU;                 |
| Px005243.1 | 3.9876 | 0.00E+00  | 0.00E+00  | Trypsin, alkaline A; similar with TRYA_MANSE;           |
| Px015277.1 | 3.9698 | 7.98E-158 | 2.09E-156 | Trypsin CFT-1; similar with TRYP_CHOFU;                 |
| Px010313.2 | 3.7896 | 2.43E-106 | 4.78E-105 | Serine proteinase stubble; similar with STUB_DROME;     |
| Px006623.1 | 3.7777 | 1.10E-26  | 9.00E-26  | Transmembrane protease serine 9;                        |
| Px013732.1 | 3.7553 | 4.20E-15  | 2.42E-14  | Proteasome subunit alpha type-7-1;                      |
| Px012813.1 | 3.6622 | 2.98E-06  | 1.02E-05  | Serine proteinase stubble; similar with STUB_DROME;     |
| Px000992.1 | 3.6006 | 0.00E+00  | 0.00E+00  | Carboxypeptidase A1; similar with CBPA1_BOVIN;          |
| Px008538.1 | 3.4202 | 3.15E-138 | 7.39E-137 | Trypsin, alkaline B; similar with TRYB_MANSE;           |
| Px005657.1 | 3.4122 | 1.95E-23  | 1.46E-22  | Proclotting enzyme; similar with PCE_TACTR;             |
| Px007621.1 | 3.3847 | 6.61E-21  | 4.65E-20  | Trypsin CFT-1; similar with TRYP_CHOFU;                 |
| Px008277.1 | 3.3443 | 1.09E-141 | 2.62E-140 | Membrane alanyl aminopeptidase;                         |
| Px015928.1 | 3.1647 | 2.57E-04  | 7.05E-04  | Carboxypeptidase B; similar with CBPB_ASTFL;            |
| Px007619.2 | 3.0951 | 0.00E+00  | 0.00E+00  | Trypsin, alkaline A; similar with TRYA_MANSE;           |
| Px015049.1 | 2.9693 | 5.52E-35  | 5.22E-34  | Venom dipeptidyl peptidase 4; similar with VDDP4_VESVU; |
| Px003479.1 | 2.9314 | 1.50E-17  | 9.44E-17  | Protein rhomboid; similar with RHOM_DROME;              |
| Px015280.1 | 2.9138 | 7.05E-10  | 3.15E-09  | Trypsin CFT-1; similar with TRYP_CHOFU;                 |
| Px000994.1 | 2.8631 | 0.00E+00  | 0.00E+00  | Zinc carboxypeptidase A 1; similar with CBPA1_DROPS;    |
| Px002993.1 | 2.7717 | 0.00E+00  | 0.00E+00  | Zinc metalloproteinase nas-4; similar with NAS4_CAEEL;  |
| Px005373.1 | 2.7565 | 1.52E-39  | 1.56E-38  | Carboxypeptidase B; similar with CBPB_ASTFL;            |
| Px007618.1 | 2.7222 | 1.13E-272 | 4.41E-271 | Trypsin CFT-1; similar with TRYP_CHOFU;                 |
| Px016567.1 | 2.6458 | 1.14E-175 | 3.25E-174 | Matrix metalloproteinase-14; similar with MMP14_RAT;    |
| Px007674.2 | 2.5239 | 0.00E+00  | 0.00E+00  | Collagenase; similar with COGS_HYPLI;                   |
| Px007675.1 | 2.5233 | 0.00E+00  | 0.00E+00  | Collagenase; similar with COGS_HYPLI;                   |
| Px010489.1 | 2.4085 | 6.89E-66  | 9.73E-65  | Trypsin, alkaline C; similar with TRYC_MANSE;           |
| Px003467.1 | 2.3876 | 2.10E-18  | 1.36E-17  | Matrix metalloproteinase-14; similar with MMP14_RABIT;  |
| Px009395.1 | 2.3871 | 1.03E-17  | 6.47E-17  | Proclotting enzyme; similar with PCE_TACTR;             |
| Px007616.1 | 2.3746 | 1.09E-158 | 2.87E-157 | Trypsin CFT-1; similar with TRYP_CHOFU;                 |
| Px001708.1 | 2.3708 | 0.00E+00  | 0.00E+00  | Aminopeptidase N; similar with AMPN_PLUXY;              |
| Px015275.1 | 2.3286 | 0.00E+00  | 0.00E+00  | Trypsin CFT-1; similar with TRYP_CHOFU;                 |
| Px001705.1 | 2.3213 | 0.00E+00  | 0.00E+00  | Membrane alanyl aminopeptidase;                         |
| Px006622.3 | 2.2728 | 9.45E-20  | 6.46E-19  | Ovochymase-1; similar with OVCH1_HUMAN;                 |
| Px001990.2 | 2.2289 | 2.92E-104 | 5.69E-103 | Carboxypeptidase B; similar with CBPB_ASTFL;            |
| Px001633.1 | 2.2212 | 3.10E-80  | 5.00E-79  | Angiotensin-converting enzyme;                          |
| Px011796.5 | 2.0740 | 1.05E-51  | 1.26E-50  | Putative aminopeptidase W07G4.4;                        |
| Px001833.1 | 2.0603 | 0.00E+00  | 0.00E+00  | Serine protease easter; similar with EAST_DROME;        |
| Px002632.1 | 2.0480 | 2.47E-165 | 6.70E-164 | Xaa-Pro dipeptidase; similar with PEPD_HUMAN;           |
| Px011097.1 | 1.9460 | 2.65E-10  | 1.22E-09  | Serine proteinase stubble; similar with STUB_DROME;     |
| Px003754.1 | 1.9228 | 1.67E-147 | 4.13E-146 | Membrane alanyl aminopeptidase;                         |
| Px006956.1 | 1.8788 | 1.02E-112 | 2.08E-111 | Xaa-Pro dipeptidase; similar with PEPD_HUMAN;           |
| Px008406.1 | 1.8639 | 2.77E-08  | 1.10E-07  | Serine proteinase stubble; similar with STUB_DROME;     |
| Px015778.1 | 1.7676 | 5.49E-08  | 2.14E-07  | Sentrin-specific protease 8; similar with SENP8_HUMAN;  |
| Px012643.1 | 1.7650 | 5.67E-95  | 1.02E-93  | Angiotensin-converting enzyme; similar with ACE_MOUSE;  |
| Px003753.1 | 1.7587 | 0.00E+00  | 0.00E+00  | Membrane alanyl aminopeptidase;                         |
| Px006502.1 | 1.6424 | 1.34E-55  | 1.68E-54  | Calpain-B; similar with CANB_DROME;                     |
| Px009715.1 | 1.5988 | 8.85E-16  | 5.24E-15  | Mitochondrial inner membrane protease subunit 1;        |
| Px011489.1 | 1.4705 | 1.48E-69  | 2.16E-68  | Gamma-glutamyl hydrolase A; similar with GGHA_DICDI;    |
| Px005726.1 | 1.4124 | 1.92E-12  | 9.85E-12  | Xaa-Pro aminopeptidase 1;                               |
| Px005747.1 | 1.4025 | 6.57E-16  | 3.92E-15  | Proteasome subunit alpha type-5;                        |
| Px016171.2 | 1.3471 | 1.79E-54  | 2.21E-53  | Prolyl endopeptidase; similar with PPCE_MOUSE;          |
| Px008337.1 | 1.2761 | 1.16E-111 | 2.35E-110 | Leishmanolysin-like peptidase;                          |
| Px002715.1 | 1.2673 | 4.39E-154 | 1.12E-152 | Cathepsin L; similar with CATL_DROME;                   |

|            |         |          |          |                                                             |
|------------|---------|----------|----------|-------------------------------------------------------------|
| Px010436.1 | 1.1181  | 3.98E-92 | 7.03E-91 | Venom serine carboxypeptidase; similar with VCP_APIME;      |
| Px008596.1 | 1.0870  | 1.05E-14 | 5.94E-14 | Transmembrane protease serine 9;                            |
| Px016983.3 | 1.0379  | 6.64E-09 | 2.78E-08 | Serine proteinase stubble; similar with STUB_DROME;         |
| Px001502.1 | -1.0334 | 1.38E-18 | 9.02E-18 | Ubiquitin carboxyl-terminal hydrolase 2;                    |
| Px013179.1 | -1.1092 | 3.73E-04 | 9.98E-04 | Insulin-degrading enzyme; similar with IDE_HUMAN;           |
| Px000827.1 | -1.1679 | 2.17E-07 | 8.16E-07 | Ubiquitin carboxyl-terminal hydrolase 2;                    |
| Px000572.1 | -1.4791 | 1.12E-04 | 3.23E-04 | Phosphatidylinositol-binding clathrin assembly protein LAP; |
| Px002987.1 | -1.5181 | 0.00E+00 | 0.00E+00 | Methionine aminopeptidase 2;                                |
| Px016787.1 | -1.6669 | 1.01E-06 | 3.59E-06 | Insulin-degrading enzyme; similar with IDE_HUMAN;           |
| Px010814.1 | -3.0382 | 1.61E-05 | 5.11E-05 | ADAMTS-like protein 3; similar with ATL3_HUMAN;             |

---

**Table K.** GO enrichment analysis of *B. bassiana* genes at 24 hpt<sub>1</sub>.

| GO ID                     | Gene numbers | P-value  | FDR      | GO term                                             |
|---------------------------|--------------|----------|----------|-----------------------------------------------------|
| <b>Cellular component</b> |              |          |          |                                                     |
| GO:0005622                | 469          | 2.85E-20 | 3.90E-17 | intracellular                                       |
| GO:0044424                | 455          | 2.79E-19 | 1.91E-16 | intracellular part                                  |
| GO:0005623                | 539          | 2.59E-18 | 8.87E-16 | cell                                                |
| GO:0044464                | 539          | 2.59E-18 | 8.87E-16 | cell part                                           |
| GO:0032991                | 198          | 3.64E-14 | 7.24E-12 | macromolecular complex                              |
| GO:0005575                | 677          | 6.79E-14 | 1.16E-11 | cellular_component                                  |
| GO:0030529                | 101          | 2.24E-13 | 3.41E-11 | ribonucleoprotein complex                           |
| GO:0043229                | 260          | 1.44E-07 | 8.56E-06 | intracellular organelle                             |
| GO:0043226                | 261          | 1.78E-07 | 9.50E-06 | organelle                                           |
| GO:0043227                | 224          | 4.03E-07 | 1.58E-05 | membrane-bounded organelle                          |
| GO:0043231                | 210          | 9.37E-07 | 3.56E-05 | intracellular membrane-bounded organelle            |
| GO:0044446                | 99           | 7.36E-06 | 2.65E-04 | intracellular organelle part                        |
| GO:0043234                | 85           | 5.58E-05 | 1.82E-03 | protein complex                                     |
| GO:0044422                | 104          | 1.79E-04 | 5.44E-03 | organelle part                                      |
| GO:0044444                | 72           | 7.71E-04 | 2.25E-02 | cytoplasmic part                                    |
| GO:0005737                | 72           | 1.06E-03 | 3.02E-02 | cytoplasm                                           |
| GO:0000502                | 13           | 1.36E-03 | 3.79E-02 | proteasome complex                                  |
| GO:0005839                | 7            | 4.01E-03 | 7.73E-02 | proteasome core complex                             |
| GO:0098588                | 15           | 5.88E-03 | 1.09E-01 | bounding membrane of organelle                      |
| GO:0019866                | 34           | 6.04E-03 | 1.10E-01 | organelle inner membrane                            |
| GO:0044432                | 8            | 8.82E-03 | 1.46E-01 | endoplasmic reticulum part                          |
| <b>Molecular Function</b> |              |          |          |                                                     |
| GO:0005198                | 70           | 2.06E-14 | 5.64E-12 | structural molecule activity                        |
| GO:0000166                | 276          | 1.39E-09 | 1.59E-07 | nucleotide binding                                  |
| GO:1901265                | 276          | 1.39E-09 | 1.59E-07 | nucleoside phosphate binding                        |
| GO:0036094                | 283          | 2.10E-09 | 2.05E-07 | small molecule binding                              |
| GO:0032559                | 157          | 5.35E-08 | 3.74E-06 | adenyl ribonucleotide binding                       |
| GO:0030554                | 157          | 7.63E-08 | 4.97E-06 | adenyl nucleotide binding                           |
| GO:0097159                | 357          | 1.80E-07 | 9.50E-06 | organic cyclic compound binding                     |
| GO:0097367                | 190          | 1.99E-07 | 9.68E-06 | carbohydrate derivative binding                     |
| GO:0032553                | 188          | 2.05E-07 | 9.68E-06 | ribonucleotide binding                              |
| GO:0032555                | 188          | 2.05E-07 | 9.68E-06 | purine ribonucleotide binding                       |
| GO:1901363                | 356          | 2.20E-07 | 1.00E-05 | heterocyclic compound binding                       |
| GO:0017076                | 188          | 2.76E-07 | 1.11E-05 | purine nucleotide binding                           |
| GO:0008135                | 27           | 7.42E-04 | 2.21E-02 | translation factor activity, nucleic acid binding   |
| GO:0016209                | 10           | 1.87E-03 | 4.87E-02 | antioxidant activity                                |
| GO:0016879                | 24           | 2.38E-03 | 5.35E-02 | ligase activity, forming carbon-nitrogen bonds      |
| GO:0004601                | 7            | 3.23E-03 | 6.69E-02 | peroxidase activity                                 |
| GO:0016684                | 7            | 3.23E-03 | 6.69E-02 | oxidoreductase activity                             |
| GO:0022890                | 16           | 4.92E-03 | 9.23E-02 | inorganic cation transmembrane transporter activity |
| GO:0016831                | 8            | 7.18E-03 | 1.26E-01 | carboxy-lyase activity                              |
| GO:0004175                | 26           | 7.88E-03 | 1.35E-01 | endopeptidase activity                              |
| GO:0016861                | 8            | 8.91E-03 | 1.46E-01 | intramolecular oxidoreductase activity              |
| GO:0003723                | 30           | 9.36E-03 | 1.46E-01 | RNA binding                                         |
| <b>Biological process</b> |              |          |          |                                                     |
| GO:0071704                | 559          | 3.70E-14 | 7.24E-12 | organic substance metabolic process                 |
| GO:0008152                | 788          | 2.48E-11 | 3.39E-09 | metabolic process                                   |
| GO:0044237                | 484          | 1.63E-09 | 1.72E-07 | cellular metabolic process                          |

|            |      |          |          |                                                          |
|------------|------|----------|----------|----------------------------------------------------------|
| GO:0044710 | 248  | 4.62E-09 | 4.09E-07 | single-organism metabolic process                        |
| GO:0008150 | 1052 | 4.78E-09 | 4.09E-07 | biological_process                                       |
| GO:0010467 | 213  | 6.40E-09 | 5.15E-07 | gene expression                                          |
| GO:0019538 | 174  | 4.04E-08 | 3.08E-06 | protein metabolic process                                |
| GO:0043170 | 358  | 5.46E-08 | 3.74E-06 | macromolecule metabolic process                          |
| GO:0044281 | 186  | 8.94E-08 | 5.56E-06 | small molecule metabolic process                         |
| GO:0044267 | 146  | 1.62E-07 | 9.25E-06 | cellular protein metabolic process                       |
| GO:0009987 | 575  | 2.28E-07 | 1.01E-05 | cellular process                                         |
| GO:0044238 | 452  | 2.41E-07 | 1.03E-05 | primary metabolic process                                |
| GO:0044763 | 277  | 2.76E-07 | 1.11E-05 | single-organism cellular process                         |
| GO:0044699 | 334  | 1.97E-06 | 7.31E-05 | single-organism process                                  |
| GO:0006412 | 56   | 1.30E-05 | 4.56E-04 | translation                                              |
| GO:0006082 | 104  | 4.21E-05 | 1.44E-03 | organic acid metabolic process                           |
| GO:0043436 | 103  | 5.59E-05 | 1.82E-03 | oxoacid metabolic process                                |
| GO:1901564 | 118  | 9.09E-05 | 2.89E-03 | organonitrogen compound metabolic process                |
| GO:0019752 | 100  | 1.42E-04 | 4.43E-03 | carboxylic acid metabolic process                        |
| GO:0006006 | 17   | 1.56E-03 | 4.26E-02 | glucose metabolic process                                |
| GO:0009167 | 16   | 1.88E-03 | 4.87E-02 | purine ribonucleoside monophosphate metabolic process    |
| GO:0009168 | 16   | 1.88E-03 | 4.87E-02 | purine ribonucleoside monophosphate biosynthetic process |
| GO:0006520 | 77   | 2.05E-03 | 5.05E-02 | cellular amino acid metabolic process                    |
| GO:0006007 | 15   | 2.14E-03 | 5.05E-02 | glucose catabolic process                                |
| GO:0019320 | 15   | 2.14E-03 | 5.05E-02 | hexose catabolic process                                 |
| GO:0044724 | 15   | 2.14E-03 | 5.05E-02 | single-organism carbohydrate catabolic process           |
| GO:0046365 | 15   | 2.14E-03 | 5.05E-02 | monosaccharide catabolic process                         |
| GO:0055086 | 58   | 2.33E-03 | 5.35E-02 | nucleobase-containing small molecule metabolic process   |
| GO:0009056 | 62   | 2.38E-03 | 5.35E-02 | catabolic process                                        |
| GO:0006091 | 28   | 2.71E-03 | 5.98E-02 | generation of precursor metabolites and energy           |
| GO:0044723 | 31   | 2.80E-03 | 6.09E-02 | single-organism carbohydrate metabolic process           |
| GO:0044712 | 39   | 2.88E-03 | 6.15E-02 | single-organism catabolic process                        |
| GO:0044260 | 237  | 3.28E-03 | 6.70E-02 | cellular macromolecule metabolic process                 |
| GO:0044085 | 26   | 3.33E-03 | 6.71E-02 | cellular component biogenesis                            |
| GO:0019318 | 21   | 3.45E-03 | 6.84E-02 | hexose metabolic process                                 |
| GO:0005996 | 22   | 4.00E-03 | 7.73E-02 | monosaccharide metabolic process                         |
| GO:1901575 | 58   | 4.21E-03 | 8.01E-02 | organic substance catabolic process                      |
| GO:0022613 | 22   | 6.25E-03 | 1.13E-01 | ribonucleoprotein complex biogenesis                     |
| GO:0009199 | 34   | 7.00E-03 | 1.24E-01 | ribonucleoside triphosphate metabolic process            |
| GO:0009141 | 35   | 7.57E-03 | 1.31E-01 | nucleoside triphosphate metabolic process                |
| GO:0009126 | 16   | 9.18E-03 | 1.46E-01 | purine nucleoside monophosphate metabolic process        |
| GO:0009127 | 16   | 9.18E-03 | 1.46E-01 | purine nucleoside monophosphate biosynthetic process     |
| GO:0009156 | 16   | 9.19E-03 | 1.46E-01 | ribonucleoside monophosphate biosynthetic process        |
| GO:0009161 | 16   | 9.19E-03 | 1.46E-01 | ribonucleoside monophosphate metabolic process           |
| GO:0009201 | 12   | 9.35E-03 | 1.46E-01 | ribonucleoside triphosphate biosynthetic process         |
| GO:0009144 | 33   | 9.67E-03 | 1.47E-01 | purine nucleoside triphosphate metabolic process         |
| GO:0009205 | 33   | 9.67E-03 | 1.47E-01 | purine ribonucleoside triphosphate metabolic process     |
| GO:0019637 | 58   | 9.83E-03 | 1.48E-01 | organophosphate metabolic process                        |

**Table L.** GO enrichment analysis of *B. bassiana* genes at 36 hpt<sub>1</sub>.

| GO ID                     | Gene numbers | P-value  | FDR      | GO term                                           |
|---------------------------|--------------|----------|----------|---------------------------------------------------|
| <b>Cellular component</b> |              |          |          |                                                   |
| GO:0005622                | 544          | 4.72E-29 | 6.46E-26 | intracellular                                     |
| GO:0044424                | 526          | 6.60E-27 | 4.52E-24 | intracellular part                                |
| GO:0005623                | 618          | 7.15E-24 | 2.45E-21 | cell                                              |
| GO:0044464                | 618          | 7.15E-24 | 2.45E-21 | cell part                                         |
| GO:0005575                | 785          | 2.45E-20 | 6.71E-18 | cellular_component                                |
| GO:0032991                | 230          | 3.28E-20 | 7.49E-18 | macromolecular complex                            |
| GO:0030529                | 113          | 2.49E-16 | 4.86E-14 | ribonucleoprotein complex                         |
| GO:0043226                | 300          | 1.49E-09 | 1.36E-07 | organelle                                         |
| GO:0043229                | 297          | 3.30E-09 | 2.66E-07 | intracellular organelle                           |
| GO:0043227                | 256          | 1.13E-08 | 7.35E-07 | membrane-bounded organelle                        |
| GO:0043231                | 241          | 1.88E-08 | 1.17E-06 | intracellular membrane-bounded organelle          |
| GO:0043234                | 101          | 1.15E-07 | 6.55E-06 | protein complex                                   |
| GO:0044422                | 125          | 1.84E-07 | 8.67E-06 | organelle part                                    |
| GO:0005737                | 89           | 6.61E-07 | 2.66E-05 | cytoplasm                                         |
| GO:0044446                | 112          | 7.49E-07 | 2.93E-05 | intracellular organelle part                      |
| GO:0044444                | 88           | 9.78E-07 | 3.72E-05 | cytoplasmic part                                  |
| GO:0031090                | 73           | 1.06E-04 | 2.60E-03 | organelle membrane                                |
| GO:0031967                | 54           | 2.80E-04 | 5.71E-03 | organelle envelope                                |
| GO:0031975                | 54           | 2.80E-04 | 5.71E-03 | envelope                                          |
| GO:0030659                | 10           | 1.14E-03 | 1.86E-02 | cytoplasmic vesicle membrane                      |
| GO:0044433                | 10           | 1.14E-03 | 1.86E-02 | cytoplasmic vesicle part                          |
| GO:0019866                | 39           | 1.56E-03 | 2.45E-02 | organelle inner membrane                          |
| GO:0030662                | 9            | 1.94E-03 | 3.01E-02 | coated vesicle membrane                           |
| GO:0044429                | 32           | 1.97E-03 | 3.02E-02 | mitochondrial part                                |
| GO:0005739                | 38           | 2.31E-03 | 3.47E-02 | mitochondrion                                     |
| GO:0012506                | 11           | 3.61E-03 | 4.90E-02 | vesicle membrane                                  |
| GO:0005634                | 22           | 4.49E-03 | 5.90E-02 | nucleus                                           |
| GO:0000502                | 13           | 6.17E-03 | 7.75E-02 | proteasome complex                                |
| GO:0016469                | 20           | 6.39E-03 | 7.95E-02 | proton-transporting two-sector ATPase complex     |
| GO:0030135                | 10           | 6.47E-03 | 7.98E-02 | coated vesicle                                    |
| GO:0044455                | 8            | 8.54E-03 | 1.02E-01 | mitochondrial membrane part                       |
| <b>Molecular Function</b> |              |          |          |                                                   |
| GO:0005198                | 73           | 2.92E-13 | 3.64E-11 | structural molecule activity                      |
| GO:0097367                | 212          | 9.17E-08 | 5.46E-06 | carbohydrate derivative binding                   |
| GO:0032559                | 172          | 1.23E-07 | 6.73E-06 | adenyl ribonucleotide binding                     |
| GO:0032553                | 209          | 1.47E-07 | 7.47E-06 | ribonucleotide binding                            |
| GO:0032555                | 209          | 1.47E-07 | 7.47E-06 | purine ribonucleotide binding                     |
| GO:0030554                | 172          | 1.82E-07 | 8.67E-06 | adenyl nucleotide binding                         |
| GO:0017076                | 209          | 2.08E-07 | 9.49E-06 | purine nucleotide binding                         |
| GO:0003723                | 41           | 5.32E-07 | 2.28E-05 | RNA binding                                       |
| GO:0008135                | 33           | 2.66E-06 | 9.60E-05 | translation factor activity, nucleic acid binding |
| GO:0036094                | 300          | 5.41E-06 | 1.90E-04 | small molecule binding                            |
| GO:0000166                | 289          | 1.98E-05 | 6.31E-04 | nucleotide binding                                |
| GO:1901265                | 289          | 1.98E-05 | 6.31E-04 | nucleoside phosphate binding                      |
| GO:0097159                | 386          | 1.02E-04 | 2.53E-03 | organic cyclic compound binding                   |
| GO:1901363                | 385          | 1.16E-04 | 2.79E-03 | heterocyclic compound binding                     |
| GO:0016836                | 14           | 5.58E-04 | 1.00E-02 | hydro-lyase activity                              |
| GO:0016651                | 12           | 2.55E-03 | 3.72E-02 | oxidoreductase activity, acting on NAD(P)H        |
| GO:0005515                | 43           | 2.88E-03 | 4.11E-02 | protein binding                                   |

|                           |      |          |          |                                                            |
|---------------------------|------|----------|----------|------------------------------------------------------------|
| GO:0003954                | 9    | 3.13E-03 | 4.32E-02 | NADH dehydrogenase activity                                |
| <b>Biological process</b> |      |          |          |                                                            |
| GO:0071704                | 629  | 3.20E-15 | 5.47E-13 | organic substance metabolic process                        |
| GO:0043170                | 427  | 2.80E-14 | 4.26E-12 | macromolecule metabolic process                            |
| GO:0010467                | 252  | 4.72E-14 | 6.46E-12 | gene expression                                            |
| GO:0019538                | 206  | 1.12E-12 | 1.27E-10 | protein metabolic process                                  |
| GO:0044267                | 173  | 1.23E-11 | 1.29E-09 | cellular protein metabolic process                         |
| GO:0044237                | 548  | 1.07E-10 | 1.05E-08 | cellular metabolic process                                 |
| GO:0008152                | 876  | 2.56E-09 | 2.19E-07 | metabolic process                                          |
| GO:0008150                | 1191 | 5.20E-09 | 3.96E-07 | biological_process                                         |
| GO:0009987                | 657  | 6.44E-09 | 4.64E-07 | cellular process                                           |
| GO:0006412                | 67   | 7.89E-09 | 5.40E-07 | translation                                                |
| GO:0044238                | 506  | 4.07E-07 | 1.80E-05 | primary metabolic process                                  |
| GO:0044710                | 266  | 6.14E-07 | 2.55E-05 | single-organism metabolic process                          |
| GO:0006091                | 36   | 1.36E-06 | 5.04E-05 | generation of precursor metabolites and energy             |
| GO:0044260                | 282  | 9.63E-06 | 3.29E-04 | cellular macromolecule metabolic process                   |
| GO:0044281                | 198  | 1.58E-05 | 5.27E-04 | small molecule metabolic process                           |
| GO:0044265                | 22   | 2.27E-05 | 7.06E-04 | cellular macromolecule catabolic process                   |
| GO:0019941                | 19   | 2.69E-05 | 7.53E-04 | modification-dependent protein catabolic process           |
| GO:0030163                | 19   | 2.69E-05 | 7.53E-04 | protein catabolic process                                  |
| GO:0043632                | 19   | 2.69E-05 | 7.53E-04 | modification-dependent macromolecule catabolic process     |
| GO:0044257                | 19   | 2.69E-05 | 7.53E-04 | cellular protein catabolic process                         |
| GO:0051603                | 19   | 2.69E-05 | 7.53E-04 | proteolysis involved in cellular protein catabolic process |
| GO:0009056                | 74   | 4.66E-05 | 1.27E-03 | catabolic process                                          |
| GO:1901575                | 70   | 6.49E-05 | 1.74E-03 | organic substance catabolic process                        |
| GO:0071840                | 65   | 7.05E-05 | 1.85E-03 | cellular component organization or biogenesis              |
| GO:0033036                | 46   | 8.02E-05 | 2.07E-03 | macromolecule localization                                 |
| GO:0044763                | 298  | 8.81E-05 | 2.23E-03 | single-organism cellular process                           |
| GO:0022613                | 27   | 1.22E-04 | 2.87E-03 | ribonucleoprotein complex biogenesis                       |
| GO:0044085                | 31   | 1.33E-04 | 3.08E-03 | cellular component biogenesis                              |
| GO:0006508                | 24   | 1.49E-04 | 3.41E-03 | proteolysis                                                |
| GO:0043436                | 112  | 1.69E-04 | 3.79E-03 | oxoacid metabolic process                                  |
| GO:0006418                | 30   | 1.74E-04 | 3.84E-03 | tRNA aminoacylation for protein translation                |
| GO:0019752                | 110  | 2.06E-04 | 4.48E-03 | carboxylic acid metabolic process                          |
| GO:0006082                | 112  | 2.45E-04 | 5.24E-03 | organic acid metabolic process                             |
| GO:0009057                | 30   | 2.72E-04 | 5.71E-03 | macromolecule catabolic process                            |
| GO:0043038                | 30   | 3.98E-04 | 7.89E-03 | amino acid activation                                      |
| GO:0043039                | 30   | 3.98E-04 | 7.89E-03 | tRNA aminoacylation                                        |
| GO:0044699                | 361  | 4.21E-04 | 8.23E-03 | single-organism process                                    |
| GO:0016485                | 24   | 4.33E-04 | 8.23E-03 | protein processing                                         |
| GO:0051604                | 24   | 4.33E-04 | 8.23E-03 | protein maturation                                         |
| GO:0008104                | 40   | 4.75E-04 | 8.68E-03 | protein localization                                       |
| GO:0015031                | 40   | 4.75E-04 | 8.68E-03 | protein transport                                          |
| GO:0045184                | 40   | 4.75E-04 | 8.68E-03 | establishment of protein localization                      |
| GO:0007010                | 11   | 7.68E-04 | 1.37E-02 | cytoskeleton organization                                  |
| GO:0006520                | 87   | 8.10E-04 | 1.42E-02 | cellular amino acid metabolic process                      |
| GO:0044249                | 162  | 9.23E-04 | 1.60E-02 | cellular biosynthetic process                              |
| GO:0044248                | 49   | 1.02E-03 | 1.75E-02 | cellular catabolic process                                 |
| GO:1901576                | 162  | 1.12E-03 | 1.86E-02 | organic substance biosynthetic process                     |
| GO:0009058                | 167  | 1.14E-03 | 1.86E-02 | biosynthetic process                                       |
| GO:0034660                | 39   | 1.35E-03 | 2.17E-02 | ncRNA metabolic process                                    |
| GO:0043933                | 19   | 1.41E-03 | 2.24E-02 | macromolecular complex subunit organization                |
| GO:0006006                | 18   | 2.22E-03 | 3.38E-02 | glucose metabolic process                                  |

|            |     |          |          |                                                     |
|------------|-----|----------|----------|-----------------------------------------------------|
| GO:0051128 | 9   | 2.37E-03 | 3.52E-02 | regulation of cellular component organization       |
| GO:0044723 | 34  | 2.50E-03 | 3.69E-02 | single-organism carbohydrate metabolic process      |
| GO:0019318 | 23  | 2.59E-03 | 3.74E-02 | hexose metabolic process                            |
| GO:0055114 | 20  | 2.95E-03 | 4.16E-02 | oxidation-reduction process                         |
| GO:1901564 | 124 | 3.03E-03 | 4.24E-02 | organonitrogen compound metabolic process           |
| GO:0005996 | 24  | 3.54E-03 | 4.85E-02 | monosaccharide metabolic process                    |
| GO:0071822 | 17  | 3.66E-03 | 4.91E-02 | protein complex subunit organization                |
| GO:0015980 | 17  | 4.38E-03 | 5.83E-02 | energy derivation by oxidation of organic compounds |
| GO:0006399 | 35  | 5.37E-03 | 6.99E-02 | tRNA metabolic process                              |
| GO:0030029 | 8   | 5.47E-03 | 6.99E-02 | actin filament-based process                        |
| GO:0030036 | 8   | 5.47E-03 | 6.99E-02 | actin cytoskeleton organization                     |
| GO:1901137 | 19  | 5.72E-03 | 7.24E-02 | carbohydrate derivative biosynthetic process        |
| GO:0042254 | 18  | 7.08E-03 | 8.65E-02 | ribosome biogenesis                                 |
| GO:1902589 | 12  | 7.84E-03 | 9.50E-02 | single-organism organelle organization              |
| GO:0045333 | 14  | 8.15E-03 | 9.78E-02 | cellular respiration                                |
| GO:0033043 | 7   | 9.72E-03 | 1.13E-01 | regulation of organelle organization                |

---

**Table M.** GO enrichment analysis of *B. bassiana* genes at 48 hpt<sub>i</sub>.

| GO ID                     | Gene numbers | P-value  | FDR      | GO term                                            |
|---------------------------|--------------|----------|----------|----------------------------------------------------|
| <b>Cellular component</b> |              |          |          |                                                    |
| GO:0005622                | 660          | 2.22E-31 | 3.04E-28 | intracellular                                      |
| GO:0044424                | 640          | 1.51E-29 | 1.03E-26 | intracellular part                                 |
| GO:0005623                | 762          | 1.90E-26 | 6.50E-24 | cell                                               |
| GO:0044464                | 762          | 1.90E-26 | 6.50E-24 | cell part                                          |
| GO:0032991                | 270          | 5.89E-23 | 1.61E-20 | macromolecular complex                             |
| GO:0005575                | 984          | 1.06E-22 | 2.42E-20 | cellular_component                                 |
| GO:0030529                | 125          | 3.45E-16 | 5.91E-14 | ribonucleoprotein complex                          |
| GO:0043226                | 381          | 1.41E-13 | 2.14E-11 | organelle                                          |
| GO:0043229                | 378          | 2.83E-13 | 3.87E-11 | intracellular organelle                            |
| GO:0043227                | 322          | 2.56E-11 | 2.34E-09 | membrane-bounded organelle                         |
| GO:0043231                | 302          | 1.00E-10 | 8.09E-09 | intracellular membrane-bounded organelle           |
| GO:0043234                | 124          | 4.87E-10 | 3.33E-08 | protein complex                                    |
| GO:0044444                | 103          | 2.58E-06 | 1.07E-04 | cytoplasmic part                                   |
| GO:0044422                | 146          | 3.27E-06 | 1.18E-04 | organelle part                                     |
| GO:0005737                | 103          | 5.83E-06 | 1.95E-04 | cytoplasm                                          |
| GO:0044446                | 129          | 3.88E-05 | 1.13E-03 | intracellular organelle part                       |
| GO:0031090                | 88           | 4.98E-05 | 1.42E-03 | organelle membrane                                 |
| GO:0031967                | 63           | 5.74E-04 | 1.31E-02 | organelle envelope                                 |
| GO:0031975                | 63           | 5.74E-04 | 1.31E-02 | envelope                                           |
| GO:0019866                | 46           | 1.40E-03 | 2.77E-02 | organelle inner membrane                           |
| GO:0005739                | 45           | 1.86E-03 | 3.44E-02 | mitochondrion                                      |
| GO:0012505                | 32           | 2.44E-03 | 4.27E-02 | endomembrane system                                |
| GO:0043228                | 64           | 7.48E-03 | 1.08E-01 | non-membrane-bounded organelle                     |
| GO:0043232                | 64           | 7.48E-03 | 1.08E-01 | intracellular non-membrane-bounded organelle       |
| GO:0044429                | 36           | 8.44E-03 | 1.19E-01 | mitochondrial part                                 |
| <b>Molecular Function</b> |              |          |          |                                                    |
| GO:0005198                | 78           | 9.21E-12 | 9.70E-10 | structural molecule activity                       |
| GO:0097159                | 514          | 1.16E-09 | 6.90E-08 | organic cyclic compound binding                    |
| GO:1901363                | 513          | 1.34E-09 | 7.63E-08 | heterocyclic compound binding                      |
| GO:0036094                | 388          | 2.69E-08 | 1.42E-06 | small molecule binding                             |
| GO:0000166                | 374          | 1.27E-07 | 5.45E-06 | nucleotide binding                                 |
| GO:1901265                | 374          | 1.27E-07 | 5.45E-06 | nucleoside phosphate binding                       |
| GO:0097367                | 257          | 2.82E-06 | 1.08E-04 | carbohydrate derivative binding                    |
| GO:0030554                | 207          | 5.69E-06 | 1.95E-04 | adenyl nucleotide binding                          |
| GO:0017076                | 254          | 7.39E-06 | 2.41E-04 | purine nucleotide binding                          |
| GO:0032559                | 206          | 1.03E-05 | 3.15E-04 | adenyl ribonucleotide binding                      |
| GO:0032553                | 253          | 1.04E-05 | 3.15E-04 | ribonucleotide binding                             |
| GO:0032555                | 253          | 1.04E-05 | 3.15E-04 | purine ribonucleotide binding                      |
| GO:0003723                | 43           | 2.43E-04 | 6.29E-03 | RNA binding                                        |
| GO:0016757                | 32           | 5.26E-04 | 1.24E-02 | transferase activity, transferring glycosyl groups |
| GO:0016616                | 23           | 6.65E-04 | 1.49E-02 | oxidoreductase activity                            |
| GO:0003676                | 169          | 1.02E-03 | 2.14E-02 | nucleic acid binding                               |
| GO:0008135                | 34           | 1.10E-03 | 2.28E-02 | translation factor activity, nucleic acid binding  |
| GO:0016879                | 31           | 1.14E-03 | 2.33E-02 | ligase activity, forming carbon-nitrogen bonds     |
| GO:0016614                | 31           | 2.39E-03 | 4.25E-02 | oxidoreductase activity                            |
| GO:0016651                | 13           | 5.85E-03 | 8.90E-02 | oxidoreductase activity, acting on NAD(P)H         |
| GO:0008168                | 21           | 6.09E-03 | 9.06E-02 | methyltransferase activity                         |
| <b>Biological process</b> |              |          |          |                                                    |



|            |      |          |          |                                                        |
|------------|------|----------|----------|--------------------------------------------------------|
| GO:0071704 | 799  | 2.40E-19 | 4.69E-17 | organic substance metabolic process                    |
| GO:0044710 | 352  | 1.51E-12 | 1.88E-10 | single-organism metabolic process                      |
| GO:0044237 | 695  | 5.98E-12 | 6.82E-10 | cellular metabolic process                             |
| GO:0009987 | 847  | 1.36E-11 | 1.33E-09 | cellular process                                       |
| GO:0044763 | 400  | 1.00E-10 | 8.09E-09 | single-organism cellular process                       |
| GO:0043170 | 512  | 1.40E-10 | 1.06E-08 | macromolecule metabolic process                        |
| GO:0044699 | 488  | 3.90E-10 | 2.81E-08 | single-organism process                                |
| GO:0019538 | 241  | 5.27E-10 | 3.37E-08 | protein metabolic process                              |
| GO:0044238 | 658  | 5.41E-10 | 3.37E-08 | primary metabolic process                              |
| GO:0010467 | 289  | 2.34E-09 | 1.28E-07 | gene expression                                        |
| GO:0008150 | 1530 | 3.98E-08 | 2.02E-06 | biological_process                                     |
| GO:0008152 | 1112 | 5.12E-08 | 2.49E-06 | metabolic process                                      |
| GO:0044281 | 255  | 5.28E-08 | 2.49E-06 | small molecule metabolic process                       |
| GO:0044267 | 198  | 5.47E-08 | 2.50E-06 | cellular protein metabolic process                     |
| GO:0006082 | 145  | 2.85E-06 | 1.08E-04 | organic acid metabolic process                         |
| GO:0019752 | 142  | 2.90E-06 | 1.08E-04 | carboxylic acid metabolic process                      |
| GO:1901564 | 166  | 2.91E-06 | 1.08E-04 | organonitrogen compound metabolic process              |
| GO:0043436 | 144  | 3.46E-06 | 1.22E-04 | oxoacid metabolic process                              |
| GO:0006520 | 113  | 1.24E-05 | 3.70E-04 | cellular amino acid metabolic process                  |
| GO:0006412 | 71   | 6.41E-05 | 1.79E-03 | translation                                            |
| GO:0008104 | 48   | 1.78E-04 | 4.69E-03 | protein localization                                   |
| GO:0015031 | 48   | 1.78E-04 | 4.69E-03 | protein transport                                      |
| GO:0045184 | 48   | 1.78E-04 | 4.69E-03 | establishment of protein localization                  |
| GO:0033036 | 53   | 3.06E-04 | 7.76E-03 | macromolecule localization                             |
| GO:0022613 | 30   | 4.14E-04 | 1.03E-02 | ribonucleoprotein complex biogenesis                   |
| GO:0006793 | 115  | 4.50E-04 | 1.10E-02 | phosphorus metabolic process                           |
| GO:0071840 | 75   | 5.25E-04 | 1.24E-02 | cellular component organization or biogenesis          |
| GO:0006091 | 37   | 6.78E-04 | 1.50E-02 | generation of precursor metabolites and energy         |
| GO:0006796 | 112  | 7.88E-04 | 1.71E-02 | phosphate-containing compound metabolic process        |
| GO:0044711 | 64   | 1.00E-03 | 2.14E-02 | single-organism biosynthetic process                   |
| GO:1901566 | 57   | 1.28E-03 | 2.57E-02 | organonitrogen compound biosynthetic process           |
| GO:0006006 | 21   | 1.42E-03 | 2.77E-02 | glucose metabolic process                              |
| GO:0005996 | 29   | 1.49E-03 | 2.88E-02 | monosaccharide metabolic process                       |
| GO:0044085 | 34   | 1.51E-03 | 2.88E-02 | cellular component biogenesis                          |
| GO:0055086 | 79   | 1.64E-03 | 3.08E-02 | nucleobase-containing small molecule metabolic process |
| GO:0044260 | 342  | 1.93E-03 | 3.53E-02 | cellular macromolecule metabolic process               |
| GO:0044723 | 41   | 2.25E-03 | 4.05E-02 | single-organism carbohydrate metabolic process         |
| GO:0006807 | 360  | 2.46E-03 | 4.27E-02 | nitrogen compound metabolic process                    |
| GO:0019318 | 27   | 2.81E-03 | 4.81E-02 | hexose metabolic process                               |
| GO:0044712 | 52   | 3.12E-03 | 5.27E-02 | single-organism catabolic process                      |
| GO:0034660 | 46   | 3.24E-03 | 5.40E-02 | ncRNA metabolic process                                |
| GO:1901605 | 46   | 3.28E-03 | 5.40E-02 | alpha-amino acid metabolic process                     |
| GO:0006007 | 18   | 4.37E-03 | 6.87E-02 | glucose catabolic process                              |
| GO:0019320 | 18   | 4.37E-03 | 6.87E-02 | hexose catabolic process                               |
| GO:0044724 | 18   | 4.37E-03 | 6.87E-02 | single-organism carbohydrate catabolic process         |
| GO:0046365 | 18   | 4.37E-03 | 6.87E-02 | monosaccharide catabolic process                       |
| GO:0019637 | 81   | 5.12E-03 | 7.96E-02 | organophosphate metabolic process                      |
| GO:0006753 | 73   | 5.19E-03 | 7.99E-02 | nucleoside phosphate metabolic process                 |
| GO:1901137 | 22   | 5.94E-03 | 8.93E-02 | carbohydrate derivative biosynthetic process           |
| GO:0042254 | 21   | 7.09E-03 | 1.04E-01 | ribosome biogenesis                                    |
| GO:0006399 | 42   | 8.31E-03 | 1.19E-01 | tRNA metabolic process                                 |
| GO:1901576 | 199  | 8.66E-03 | 1.21E-01 | organic substance biosynthetic process                 |
| GO:0065008 | 21   | 8.80E-03 | 1.22E-01 | regulation of biological quality                       |
| GO:0009058 | 205  | 9.78E-03 | 1.34E-01 | biosynthetic process                                   |

GO:0044249 198 9.90E-03 1.34E-01 cellular biosynthetic process

---

**Table N.** Putative *B. bassiana* secretion proteins continuous expressed during infection.

| Gene ID   | RPKM                |                     |                     | Annotation                                     |
|-----------|---------------------|---------------------|---------------------|------------------------------------------------|
|           | 24 hpt <sub>I</sub> | 36 hpt <sub>I</sub> | 48 hpt <sub>I</sub> |                                                |
| BBA_08898 |                     | 0.3741              | 0.5024              | Peptidase cysteine/serine, trypsin             |
| BBA_10053 | 0.2493              | 0.0226              | 0.0228              | NIMA-interacting protein TinC                  |
| BBA_07199 | 1.3754              | 0.4406              | 0.8137              | peptidyl-prolyl cis-trans isomerase B          |
| BBA_02046 |                     | 0.0734              | 0.1849              | nucleotide exchange factor SIL1                |
| BBA_00520 | 0.3607              | 0.1801              | 0.1979              | heterokaryon incompatibility protein Het-C     |
| BBA_07851 |                     | 0.1627              | 0.4778              | hypothetical protein BBA_07851                 |
| BBA_02025 | 0.2452              | 0.0159              | 0.3042              | glycoside hydrolase family 31                  |
| BBA_03905 | 0.6326              | 0.7810              | 1.4114              | hsp70-like protein                             |
| BBA_05172 |                     | 0.0865              | 0.1161              | glycosyl hydrolase family 47                   |
| BBA_08491 | 2.0279              | 0.0969              | 0.1301              | GEgh16 protein                                 |
| BBA_01337 | 0.2395              |                     | 0.2190              | hypothetical protein BBA_01337                 |
| BBA_06454 |                     | 0.0404              | 0.2442              | glycosyltransferase family 17                  |
| BBA_04983 | 0.0431              | 0.0392              |                     | Heterokaryon incompatibility Het-C             |
| BBA_03039 |                     | 0.0769              | 0.4131              | flavin containing amine oxidoreductase         |
| BBA_09468 | 0.0640              |                     | 0.0488              | WSC domain-containing protein                  |
| BBA_06777 | 0.1111              | 0.0504              | 0.2031              | nuclease S1                                    |
| BBA_04223 |                     | 0.0529              | 0.0533              | gamma-glutamyltranspeptidase                   |
| BBA_08434 |                     | 0.1046              | 0.1054              | lipase class 2                                 |
| BBA_06623 | 0.1344              | 0.0610              | 0.2150              | disulfide isomerase                            |
| BBA_06290 | 0.0669              | 0.0304              |                     | amidohydrolase-like protein                    |
| BBA_10292 | 1.3236              | 0.3433              | 1.0373              | cytochrome c oxidase assembly factor           |
| BBA_00303 | 0.6472              | 0.0452              | 0.2276              | endoglucanase, putative                        |
| BBA_00564 |                     | 0.0931              | 0.0938              | hypothetical protein BBA_00564                 |
| BBA_08504 |                     | 0.7236              | 0.2429              | hypothetical protein BBA_08504                 |
| BBA_08440 |                     | 0.1872              | 0.4525              | Molecular chaperone, heat shock protein, Hsp40 |
| BBA_08183 | 0.0570              | 0.0259              | 0.2086              | laccase 2                                      |
| BBA_01026 | 0.0471              | 0.0856              |                     | hypothetical protein BBA_01026                 |
| BBA_04314 | 0.0223              |                     | 0.0817              | alpha-N-acetylglucosaminidase, putative        |
| BBA_06203 | 0.5704              |                     | 0.7823              | hypothetical protein BBA_06203                 |
| BBA_03834 | 0.1530              |                     | 0.0699              | glycosyl hydrolase family 16                   |
| BBA_00968 | 0.5724              |                     | 0.5233              | hypothetical protein BBA_00968                 |
| BBA_01346 | 1.2539              | 0.5391              | 0.3620              | hypothetical protein BBA_01346                 |
| BBA_02865 |                     | 0.0459              | 0.0462              | serine carboxypeptidase                        |
| BBA_02608 | 0.9755              | 0.5535              | 0.3345              | biotrophy-associated secreted protein 2        |
| BBA_07659 | 0.4418              |                     | 1.0649              | sulphydryl oxidase                             |
| BBA_07690 | 0.1580              | 0.2869              | 0.1445              | hypothetical protein BBA_07690                 |
| BBA_05303 | 0.2343              | 0.1063              |                     | subtilase-like protein                         |
| BBA_00039 | 1.3571              | 1.2319              | 0.4963              | hypothetical protein BBA_00039                 |
| BBA_07333 | 1.8698              | 1.4548              | 2.6865              | hypothetical protein BBA_07333                 |
| BBA_03440 | 0.4808              | 0.4364              |                     | hypothetical protein BBA_03440                 |
| BBA_06599 | 8.2690              | 5.9259              | 8.7542              | hydrophobin-like protein                       |
| BBA_05017 | 0.6708              | 0.1853              | 0.0800              | amidase-like protein                           |
| BBA_06201 |                     | 0.5875              | 0.2959              | hypothetical protein BBA_06201                 |
| BBA_01227 |                     | 0.1222              | 0.3693              | hypothetical protein BBA_01227                 |
| BBA_06224 | 1.3764              | 0.1209              | 1.0555              | ice nucleation protein                         |
| BBA_04972 | 0.1355              | 0.0492              |                     | eukaryotic aspartyl protease                   |
| BBA_07277 | 0.0562              | 0.0510              |                     | hypothetical protein BBA_07277                 |
| BBA_00736 | 0.4808              | 1.3093              | 0.7327              | hypothetical protein BBA_00736                 |
| BBA_02068 | 0.2770              | 0.0419              | 0.0633              | calcineurin-like phosphoesterase               |
| BBA_05746 |                     | 0.0583              | 0.0587              | FAD binding domain protein                     |

|           |         |        |        |                                                            |
|-----------|---------|--------|--------|------------------------------------------------------------|
| BBA_04066 |         | 0.0248 | 0.0249 | PLC-like phosphodiesterase                                 |
| BBA_01335 | 0.0713  | 0.1942 |        | GPI anchored glycoprotein, putative                        |
| BBA_06564 | 1.9083  | 0.7874 | 0.6345 | hypothetical protein BBA_06564                             |
| BBA_02374 | 0.1062  |        | 0.0485 | metalloprotease-like protein                               |
| BBA_10203 | 0.2134  | 0.1937 | 0.4181 | brefeldin A resistance protein                             |
| BBA_02148 | 0.9297  | 0.7596 | 0.8501 | hypothetical protein BBA_02148                             |
| BBA_08623 | 0.3205  |        | 0.4396 | hypothetical protein BBA_08623                             |
| BBA_06297 | 0.2057  | 0.1120 | 0.0376 | chitinase-like protein                                     |
| BBA_00080 | 0.3825  | 0.1736 | 0.6120 | hypothetical protein BBA_00080                             |
| BBA_10055 | 0.3418  | 0.0955 | 0.0481 | putative hexosaminidase                                    |
| BBA_07560 | 1.0825  | 0.1787 | 0.1800 | hypothetical protein BBA_07560                             |
| BBA_06589 | 0.1623  | 0.2947 |        | 5'/3'-nucleotidase SurE                                    |
| BBA_08723 | 0.7317  | 0.1107 | 0.1115 | Epl1 protein                                               |
| BBA_08695 |         | 0.0335 | 1.6852 | serin endopeptidase                                        |
| BBA_09070 | 0.3698  | 0.5036 | 1.3526 | hypothetical protein BBA_09070                             |
| BBA_04526 | 0.0792  | 0.0359 |        | cellulase-like protein                                     |
| BBA_08224 | 2.8347  | 2.6140 | 1.0285 | hypothetical protein BBA_08224                             |
| BBA_02727 |         | 0.0382 | 0.0769 | Chymotrypsin-like protein                                  |
| BBA_09296 |         | 0.1328 | 0.4014 | hypothetical protein BBA_09296                             |
| BBA_01690 |         | 0.2777 | 0.2797 | phosphatidylinositol/phosphatidylglycerol transfer protein |
| BBA_02781 | 5.4593  | 2.2990 | 1.3379 | WSC domain-containing protein                              |
| BBA_09728 | 0.6350  | 1.8014 | 3.2659 | hypothetical protein BBA_09728                             |
| BBA_01324 |         | 0.7767 | 3.3902 | hypothetical protein BBA_01324                             |
| BBA_08022 | 0.4315  | 0.3314 | 1.0622 | protein disulfide isomerase                                |
| BBA_07494 | 0.0166  |        | 0.1212 | SPX domain-containing protein                              |
| BBA_02121 | 8.1336  | 3.1824 | 1.6668 | hypothetical protein BBA_02121                             |
| BBA_02631 | 0.3914  | 1.4210 | 0.2684 | hypothetical protein BBA_02631                             |
| BBA_07874 |         | 0.0460 | 0.0464 | endoplasmic Reticulum Oxidoreductin 1                      |
| BBA_07427 | 0.6556  | 1.9838 |        | hypothetical protein BBA_07427                             |
| BBA_10272 |         | 0.0519 | 0.0732 | UDP-glucose:glycoprotein glucosyltransferase               |
| BBA_04722 | 0.0557  | 0.0506 |        | hypothetical protein BBA_04722                             |
| BBA_07048 | 0.3506  | 0.5304 | 0.4274 | hypothetical protein BBA_07048                             |
| BBA_00745 | 0.3629  | 0.2882 | 0.5391 | disulfide-isomerase erp38                                  |
| BBA_05929 | 0.1265  | 0.0766 | 0.1542 | WSC domain-containing protein                              |
| BBA_09033 | 0.2550  | 0.8101 | 2.2147 | hypothetical protein BBA_09033                             |
| BBA_02095 | 0.4674  |        | 0.4274 | hypothetical protein BBA_02095                             |
| BBA_04446 | 0.2524  |        | 0.4616 | PCI domain-containing protein                              |
| BBA_02230 |         | 0.0422 | 0.0213 | chitinase-like protein                                     |
| BBA_08789 | 0.8121  | 0.3276 | 0.3300 | phosphorylcholine phosphatase                              |
| BBA_06292 | 0.0774  |        | 0.1415 | subtilase-like protein                                     |
| BBA_02999 | 1.2020  | 0.7794 | 0.4710 | hydrophobin-like protein                                   |
| BBA_07148 |         | 0.1736 | 0.1748 | hypothetical protein BBA_07148                             |
| BBA_01712 |         | 0.0491 | 0.8905 | hypothetical protein BBA_01712                             |
| BBA_07293 | 2.2724  | 1.0035 | 0.4492 | hypothetical protein BBA_07293                             |
| BBA_00246 | 0.2019  | 0.8554 | 0.1846 | cutinase-like protein                                      |
| BBA_02446 | 0.1654  | 0.0375 | 0.3024 | ice nucleation protein                                     |
| BBA_09760 | 0.1689  | 0.1342 | 0.3282 | Catalase-peroxidase                                        |
| BBA_05552 |         | 0.0832 | 0.0838 | glycosyltransferase                                        |
| BBA_02206 | 0.1096  |        | 0.0501 | carboxypeptidase S1                                        |
| BBA_06720 | 2.0005  | 1.4955 |        | hypothetical protein BBA_06720                             |
| BBA_09155 | 3.1346  | 0.7488 | 0.3017 | hypothetical protein BBA_09155                             |
| BBA_07501 |         | 0.3433 | 0.6915 | hypothetical protein BBA_07501                             |
| BBA_03268 | 0.2003  |        | 0.3663 | hypothetical protein BBA_03268                             |
| BBA_08776 | 14.8951 | 4.6446 | 1.5594 | hypothetical protein BBA_08776                             |

|           |         |         |         |                                               |
|-----------|---------|---------|---------|-----------------------------------------------|
| BBA_09878 | 0.1809  | 0.3285  | 0.3309  | hypothetical protein BBA_09878                |
| BBA_10020 |         | 0.0589  | 0.1482  | DnaJ domain-containing protein                |
| BBA_03898 | 0.7212  | 0.5456  | 0.7693  | small secreted protein                        |
| BBA_02140 | 0.1150  | 0.1392  |         | hypothetical protein BBA_02140                |
| BBA_05894 | 0.0663  |         | 0.0606  | eukaryotic aspartyl protease                  |
| BBA_06527 | 0.3473  | 0.1146  |         | feruloyl esterase B precursor                 |
| BBA_10328 | 0.6339  |         | 0.1054  | hypothetical protein BBA_10328                |
| BBA_04700 | 0.6350  | 0.1441  | 0.8709  | hypothetical protein BBA_04700                |
| BBA_08078 | 0.1923  | 0.2619  | 0.0879  | hypothetical protein BBA_08078                |
| BBA_04640 | 1.2886  | 0.9977  | 1.0743  | glucanosyltransferase-like protein            |
| BBA_08080 | 0.2047  |         | 0.0374  | hypothetical protein BBA_08080                |
| BBA_06650 | 0.0694  | 0.0945  |         | putative aspartic endopeptidase               |
| BBA_07745 | 0.0982  | 0.1783  | 1.0776  | Glycoside hydrolase, catalytic core           |
| BBA_00386 | 1.2945  | 0.6409  | 0.9684  | FKBP-type peptidyl-prolyl cis-trans isomerase |
| BBA_05577 | 0.2329  | 0.3171  | 0.3194  | SCP-like extracellular protein                |
| BBA_09501 |         | 0.0471  | 0.0950  | subtilisin-like protease PR1F                 |
| BBA_05436 | 1.3794  | 1.3356  | 0.2522  | hypothetical protein BBA_05436                |
| BBA_00698 |         | 0.0887  | 0.2680  | restless-like transposase                     |
| BBA_08214 | 0.0839  | 0.0762  |         | cell wall glucanosyltransferase Mwg1          |
| BBA_08602 | 0.3983  |         | 0.3642  | LysM domain-containing protein                |
| BBA_05281 | 0.8742  | 0.7935  | 0.1998  | hypothetical protein BBA_05281                |
| BBA_08573 | 2.2653  | 0.5141  | 0.2219  | extracellular serine-rich protein             |
| BBA_07600 | 0.5048  |         | 0.1539  | hypothetical protein BBA_07600                |
| BBA_10113 | 0.1784  | 0.2699  |         | surface antigen                               |
| BBA_02352 | 19.4091 | 12.2767 | 23.9760 | hypothetical protein BBA_02352                |
| BBA_05808 | 0.1261  | 0.2288  | 0.5186  | cell wall protein                             |
| BBA_05264 | 2.0653  | 1.2498  | 0.2098  | chitinase-like protein                        |
| BBA_01553 | 0.1972  | 0.1193  |         | hypothetical protein BBA_01553                |
| BBA_00943 | 1.2995  | 0.4718  | 0.6535  | hypothetical protein BBA_00943                |
| BBA_07943 | 0.0813  | 0.1476  |         | glycerophosphoryl diester phosphodiesterase   |
| BBA_07637 |         | 0.3917  | 0.1973  | hypothetical protein BBA_07637                |
| BBA_03015 | 0.1237  | 0.7862  | 0.7919  | class I hydrophobin                           |
| BBA_05879 | 0.0545  | 0.0494  |         | aorsin-like protein                           |
| BBA_09685 | 0.4308  | 0.6778  | 0.3413  | metalloprotease-like protein                  |
| BBA_08600 |         | 0.0310  | 0.2497  | 1,3-beta-glucanosyltransferase gel2           |
| BBA_02379 |         | 0.3990  | 1.0334  | adhesin protein Mad2                          |
| BBA_02602 | 2.6097  | 0.4084  | 2.0570  | cell wall protein                             |
| BBA_03207 | 0.0619  | 0.0281  |         | amidase-like protein                          |
| BBA_02045 | 0.3357  | 0.7238  | 0.5755  | exo-beta-1,3-glucanase, putative              |
| BBA_07227 | 0.0668  |         | 0.0611  | malate dehydrogenase                          |
| BBA_08200 | 0.0768  | 0.0698  | 0.7026  | p24 protein, involved in membrane trafficking |
| BBA_05689 | 2.1472  | 0.3173  | 0.9588  | extracellular dioxygenase                     |
| BBA_08480 | 0.1463  | 0.2657  | 1.4048  | hypothetical protein BBA_08480                |
| BBA_06750 | 1.9633  | 2.2913  | 1.5386  | hypothetical protein BBA_06750                |
| BBA_03016 |         | 0.0736  | 0.1112  | peptidase family protein                      |
| BBA_05283 | 0.0870  |         | 0.0795  | peptidase family M28                          |
| BBA_04710 | 0.2475  | 1.0109  | 0.7919  | Mmc protein                                   |
| BBA_09621 | 0.1088  | 0.0593  | 0.0796  | glycosyl hydrolase, putative                  |
| BBA_09427 | 0.1594  | 0.2025  | 0.1166  | serine carboxypeptidase                       |
| BBA_07648 | 1.1144  | 0.8093  | 0.1019  | hypothetical protein BBA_07648                |
| BBA_04098 | 0.1451  | 0.3951  | 0.1326  | hypothetical protein BBA_04098                |
| BBA_06139 | 0.0389  |         | 0.2132  | GPI anchored protein                          |
| BBA_09500 |         | 0.0915  | 0.2073  | cuticle-degrading serine protease             |
| BBA_02548 | 0.0495  | 0.0899  | 0.0905  | twin-arginine translocation pathway signal    |

|           |        |        |        |                                                   |
|-----------|--------|--------|--------|---------------------------------------------------|
| BBA_01466 | 0.0648 | 0.1177 | 0.2372 | beta-glucosidase                                  |
| BBA_09280 | 3.2475 | 1.7420 | 0.4049 | hypothetical protein BBA_09280                    |
| BBA_04521 |        | 0.1107 | 0.1115 | hypothetical protein BBA_04521                    |
| BBA_08621 |        | 0.1538 | 0.1033 | Axe2-like protein                                 |
| BBA_05603 | 0.0230 |        | 0.0841 | Catalase-like domain, heme-dependent              |
| BBA_00766 | 0.1310 | 0.2378 |        | ribonuclease Trv, RNase Trv                       |
| BBA_01529 | 0.1167 | 0.1059 | 0.2667 | prenylcysteine oxidase                            |
| BBA_05615 | 1.0090 | 0.5909 | 0.2381 | metalloprotease-like protein                      |
| BBA_08498 | 0.1325 |        | 0.0606 | endonuclease/exonuclease/phosphatase family       |
| BBA_03412 | 1.3166 | 0.5976 | 0.3010 | putative cell wall glycoprotein                   |
| BBA_01910 | 0.5636 |        | 0.5153 | hypothetical protein BBA_01910                    |
| BBA_02309 | 0.1717 |        | 0.1570 | serine proteinase inhibitor IA-2                  |
| BBA_08416 |        | 0.0604 | 0.0304 | peptidase family M28                              |
| BBA_02852 | 0.1242 | 0.0282 | 0.0568 | penicillin-binding protein                        |
| BBA_01658 | 0.2293 | 0.2497 | 0.2515 | CAS1-like protein                                 |
| BBA_09242 | 1.0684 | 0.3233 | 1.3025 | ecm33-like protein                                |
| BBA_09422 | 0.1691 | 0.1535 |        | hypothetical protein BBA_09422                    |
| BBA_07621 | 0.4476 | 0.0813 | 0.0818 | hypothetical protein BBA_07621                    |
| BBA_08791 | 0.0793 | 0.0480 | 0.0242 | alkaline serine protease AorO                     |
| BBA_01654 | 0.0709 | 0.1286 | 0.0324 | oxalate decarboxylase family bicupin              |
| BBA_10058 | 0.0524 | 0.0476 | 0.5752 | hypothetical protein BBA_10058                    |
| BBA_08030 | 0.1923 | 0.1746 | 0.5275 | hypothetical protein BBA_08030                    |
| BBA_00702 | 0.1222 | 0.1663 | 0.8936 | lipase, putative                                  |
| BBA_00850 |        | 0.0266 | 0.1072 | putative SERINE-TYPE CARBOXYPEPTIDASE F PRECURSOR |
| BBA_07009 | 0.4518 | 0.4101 | 0.7228 | alkaline foam protein B precursor                 |
| BBA_07997 | 0.9466 | 0.2387 |        | hypothetical protein BBA_07997                    |
| BBA_02239 | 0.6390 | 0.0967 | 0.0779 | eukaryotic aspartyl protease                      |
| BBA_03990 | 0.1683 | 0.4583 | 0.9539 | beta-1,3-glucanosyltransferase                    |
| BBA_02529 | 2.6571 | 1.7866 | 2.1595 | DNase1 protein                                    |
| BBA_03668 | 0.1169 | 0.2122 | 0.6945 | hypothetical protein BBA_03668                    |
| BBA_09144 | 0.3060 | 0.2777 | 0.5595 | GPI anchored protein, putative                    |
| BBA_07623 | 0.0500 | 0.1362 | 0.2743 | trehalase-like protein                            |
| BBA_02459 |        | 0.3070 | 0.1546 | hypothetical protein BBA_02459                    |
| BBA_06776 | 0.0687 | 0.1247 |        | hypothetical protein BBA_06776                    |
| BBA_07249 | 0.0310 | 0.1409 |        | ECM14-like protein                                |
| BBA_04792 | 1.7126 | 0.7435 |        | hypothetical protein BBA_04792                    |
| BBA_07358 |        | 0.2869 | 0.2889 | hypothetical protein BBA_07358                    |
| BBA_05770 |        | 0.0505 | 0.1400 | serine/threonine kinase IREI                      |
| BBA_09173 | 9.8164 | 3.1824 | 1.2822 | hypothetical protein BBA_09173                    |
| BBA_08970 | 1.8889 | 1.8705 | 2.6690 | hypothetical protein BBA_08970                    |
| BBA_01020 | 0.3970 | 0.0832 | 0.2234 | glucosidase II beta subunit-like protein          |
| BBA_01743 | 1.3932 | 0.7987 | 1.0392 | glucan 1,3-beta-glucosidase                       |
| BBA_08863 | 2.2263 | 1.7237 | 0.1796 | metalloprotease 1                                 |
| BBA_02001 | 0.3725 | 0.2766 | 0.4334 | WSC domain-containing protein                     |
| BBA_09753 | 0.6233 | 0.3772 |        | hypothetical protein BBA_09753                    |
| BBA_10330 | 0.0390 |        | 0.3562 | septation protein SUN4                            |
| BBA_08433 | 0.1291 | 1.2502 | 0.3542 | quercetin 2,3-dioxygenase                         |
| BBA_07674 |        | 0.0477 | 0.0480 | Peptidase S33, tripeptidyl-peptidase              |
| BBA_10249 |        | 0.0391 | 0.1379 | kynurenine 3-monooxygenase                        |
| BBA_02780 |        | 0.3250 | 0.4092 | hypothetical protein BBA_02780                    |
| BBA_01863 | 0.9349 | 0.0943 | 0.8548 | hypothetical protein BBA_01863                    |
| BBA_02361 | 0.5296 | 0.5875 | 0.8608 | FMN-binding split barrel-related protein          |
| BBA_07594 | 0.4888 | 0.1268 | 1.0853 | hypothetical protein BBA_07594                    |
| BBA_09671 |        | 0.1490 | 0.1501 | hypothetical protein BBA_09671                    |

|           |        |        |        |                                                         |
|-----------|--------|--------|--------|---------------------------------------------------------|
| BBA_08402 |        | 0.0298 | 0.0902 | monooxygenase-like protein                              |
| BBA_06749 | 0.7496 | 0.4083 | 0.1371 | chitinase 18-11                                         |
| BBA_04424 |        | 0.0455 | 0.0458 | hypothetical protein BBA_04424                          |
| BBA_04903 | 0.3211 | 0.0583 |        | rasp f 7 allergen                                       |
| BBA_01961 | 0.0712 | 0.0646 |        | hypothetical protein BBA_01961                          |
| BBA_04753 | 0.0287 | 0.2082 | 0.8912 | Concanavalin A-like lectin/glucanase                    |
| BBA_06706 | 0.0835 |        | 0.0764 | Chitin-binding, domain 3                                |
| BBA_02312 | 0.1590 | 0.2165 | 0.0969 | eukaryotic aspartyl protease                            |
| BBA_08015 | 0.1307 | 0.0949 |        | protein phosphatase type 1 complex subunit Hex2/Reg1    |
| BBA_02532 | 0.1580 | 0.0717 |        | S-layer protein                                         |
| BBA_02290 | 0.1137 |        | 0.0693 | eukaryotic aspartyl protease                            |
| BBA_07868 | 0.3580 |        | 0.2455 | hypothetical protein BBA_07868                          |
| BBA_02253 | 0.1215 | 0.1103 |        | cation efflux family protein                            |
| BBA_05906 | 0.8931 | 0.1280 |        | serine-threonine rich protein                           |
| BBA_08497 | 0.0581 | 0.0528 | 0.0531 | Glycoside hydrolase, family 20                          |
| BBA_00325 | 1.0409 |        | 0.6345 | ribosomal protein L36                                   |
| BBA_07620 |        | 0.1057 | 0.1065 | polysaccharide deacetylase                              |
| BBA_07256 |        | 0.0339 | 0.0682 | secretory pathway protein Sec39                         |
| BBA_03717 | 0.4286 | 0.0819 | 0.1031 | beta-1,3-glucanase precursor                            |
| BBA_01022 | 0.0533 | 0.0242 |        | WSC domain-containing protein                           |
| BBA_00307 | 0.7928 | 0.0654 | 0.4283 | Protein of unknown function DUF2401, secretory          |
| BBA_03167 | 1.5776 | 0.3472 | 1.8796 | glycosyl hydrolase 53 domain-containing protein         |
| BBA_08492 | 0.5832 | 0.0756 |        | extracellular serine-rich protein                       |
| BBA_05976 | 0.2732 | 0.0248 |        | Peptidase S33, tripeptidyl-peptidase                    |
| BBA_05194 |        | 0.0680 | 0.0228 | molybdenum cofactor synthesis domain-containing protein |
| BBA_07920 |        | 0.0298 | 0.0902 | Zinc finger CCCH type domain containing protein         |
| BBA_08283 | 2.0948 | 1.0775 | 1.4684 | hypothetical protein BBA_08283                          |
| BBA_06304 |        | 0.0800 | 0.0806 | lipocalin-like domain-containing protein                |
| BBA_04181 | 0.0508 |        | 0.0930 | S1/P1 nuclease                                          |
| BBA_03246 | 0.9935 |        | 0.2271 | cell wall protein                                       |
| BBA_01048 |        | 0.0844 | 0.2550 | oxidoreductase domain-containing protein                |
| BBA_07645 |        | 0.1501 | 0.3402 | exopolyphosphatase-like protein                         |
| BBA_02925 |        | 0.1535 | 0.5412 | peptidase family M28                                    |

---
